# Supplementary material for: The Anion Impact on Dimensionality of Cadmium(II) Complexes with Nicotinamide
Source: MDPI journal article supplement (doi:10.3390/chemistry5020092), 2023-06-01

---

The following ALERTS were generated. Each ALERT has the format

**test-name\_ALERT\_alert-type\_alert-level.**

Click on the hyperlinks for more details of the test.

---

### Alert level C

|                   |                                                  |              |
|-------------------|--------------------------------------------------|--------------|
| PLAT053_ALERT_1_C | Minimum Crystal Dimension Missing (or Error) ... | Please Check |
| PLAT054_ALERT_1_C | Medium Crystal Dimension Missing (or Error) ...  | Please Check |
| PLAT055_ALERT_1_C | Maximum Crystal Dimension Missing (or Error) ... | Please Check |
| PLAT094_ALERT_2_C | Ratio of Maximum / Minimum Residual Density .... | 2.95 Report  |
| PLAT232_ALERT_2_C | Hirshfeld Test Diff (M-X) Cd1 --O6 .             | 6.3 s.u.     |
| PLAT242_ALERT_2_C | Low 'MainMol' Ueq as Compared to Neighbors of    | Cd1 Check    |
| PLAT260_ALERT_2_C | Large Average Ueq of Residue Including Cl2       | 0.132 Check  |
| PLAT314_ALERT_2_C | Small Angle for H2O: Metal-O6 -H26O .            | 63.34 Degree |
| PLAT420_ALERT_2_C | D-H Bond Without Acceptor N4 --H14N .            | Please Check |

---

### Alert level G

|                   |                                                               |             |
|-------------------|---------------------------------------------------------------|-------------|
| PLAT002_ALERT_2_G | Number of Distance or Angle Restraints on AtSite              | 21 Note     |
| PLAT172_ALERT_4_G | The CIF-Embedded .res File Contains DFIX Records              | 14 Report   |
| PLAT173_ALERT_4_G | The CIF-Embedded .res File Contains DANG Records              | 3 Report    |
| PLAT244_ALERT_4_G | Low 'Solvent' Ueq as Compared to Neighbors of                 | Cl1 Check   |
| PLAT244_ALERT_4_G | Low 'Solvent' Ueq as Compared to Neighbors of                 | Cl2 Check   |
| PLAT303_ALERT_2_G | Full Occupancy Atom H26O with # Connections                   | 2.00 Check  |
| PLAT790_ALERT_4_G | Centre of Gravity not Within Unit Cell: Resd. #<br>C6 H6 N2 O | 2 Note      |
| PLAT790_ALERT_4_G | Centre of Gravity not Within Unit Cell: Resd. #<br>Cl O4      | 3 Note      |
| PLAT794_ALERT_5_G | Tentative Bond Valency for Cd1 (II) .                         | 2.31 Info   |
| PLAT860_ALERT_3_G | Number of Least-Squares Restraints .....                      | 17 Note     |
| PLAT883_ALERT_1_G | No Info/Value for _atom_sites_solution_primary .              | Please Do ! |
| PLAT941_ALERT_3_G | Average HKL Measurement Multiplicity .....                    | 2.2 Low     |
| PLAT967_ALERT_5_G | Note: Two-Theta Cutoff Value in Embedded .res ..              | 50.0 Degree |

---

0 **ALERT level A** = Most likely a serious problem - resolve or explain  
0 **ALERT level B** = A potentially serious problem, consider carefully  
9 **ALERT level C** = Check. Ensure it is not caused by an omission or oversight  
13 **ALERT level G** = General information/check it is not something unexpected

4 ALERT type 1 CIF construction/syntax error, inconsistent or missing data  
8 ALERT type 2 Indicator that the structure model may be wrong or deficient  
2 ALERT type 3 Indicator that the structure quality may be low  
6 ALERT type 4 Improvement, methodology, query or suggestion  
2 ALERT type 5 Informative message, check

---

## Validation response form

Please find below a validation response form (VRF) that can be filled in and pasted into your CIF.

# start Validation Reply Form

\_vrf\_PLAT053\_3

;

PROBLEM: Minimum Crystal Dimension Missing (or Error) ... Please Check

```

RESPONSE: ...
;
_vrf_PLAT054_3
;
PROBLEM: Medium Crystal Dimension Missing (or Error) ... Please Check
RESPONSE: ...
;
_vrf_PLAT055_3
;
PROBLEM: Maximum Crystal Dimension Missing (or Error) ... Please Check
RESPONSE: ...
;
_vrf_PLAT094_3
;
PROBLEM: Ratio of Maximum / Minimum Residual Density .... 2.95 Report
RESPONSE: ...
;
_vrf_PLAT232_3
;
PROBLEM: Hirshfeld Test Diff (M-X) Cd1 --O6 . 6.3 s.u.
RESPONSE: ...
;
_vrf_PLAT242_3
;
PROBLEM: Low 'MainMol' Ueq as Compared to Neighbors of Cd1 Check
RESPONSE: ...
;
_vrf_PLAT260_3
;
PROBLEM: Large Average Ueq of Residue Including C12 0.132 Check
RESPONSE: ...
;
_vrf_PLAT314_3
;
PROBLEM: Small Angle for H2O: Metal-O6 -H260 . 63.34 Degree
RESPONSE: ...
;
_vrf_PLAT420_3
;
PROBLEM: D-H Bond Without Acceptor N4 --H14N . Please Check
RESPONSE: ...
;
# end Validation Reply Form

```

---

It is advisable to attempt to resolve as many as possible of the alerts in all categories. Often the minor alerts point to easily fixed oversights, errors and omissions in your CIF or refinement strategy, so attention to these fine details can be worthwhile. In order to resolve some of the more serious problems it may be necessary to carry out additional measurements or structure refinements. However, the purpose of your study may justify the reported deviations and the more serious of these should normally be commented upon in the discussion or experimental section of a paper or in the "special\_details" fields of the CIF. checkCIF was carefully designed to identify outliers and unusual parameters, but every test has its limitations and alerts that are not important in a particular case may appear. Conversely, the absence of alerts does not guarantee there are no aspects of the results needing attention. It is up to the individual to critically assess their own results and, if necessary, seek expert advice.

### **Publication of your CIF in IUCr journals**

A basic structural check has been run on your CIF. These basic checks will be run on all CIFs submitted for publication in IUCr journals (*Acta Crystallographica*, *Journal of Applied Crystallography*, *Journal of Synchrotron Radiation*); however, if you intend to submit to *Acta Crystallographica Section C* or *E* or *IUCrData*, you should make sure that full publication checks are run on the final version of your CIF prior to submission.

### **Publication of your CIF in other journals**

Please refer to the *Notes for Authors* of the relevant journal for any special instructions relating to CIF submission.

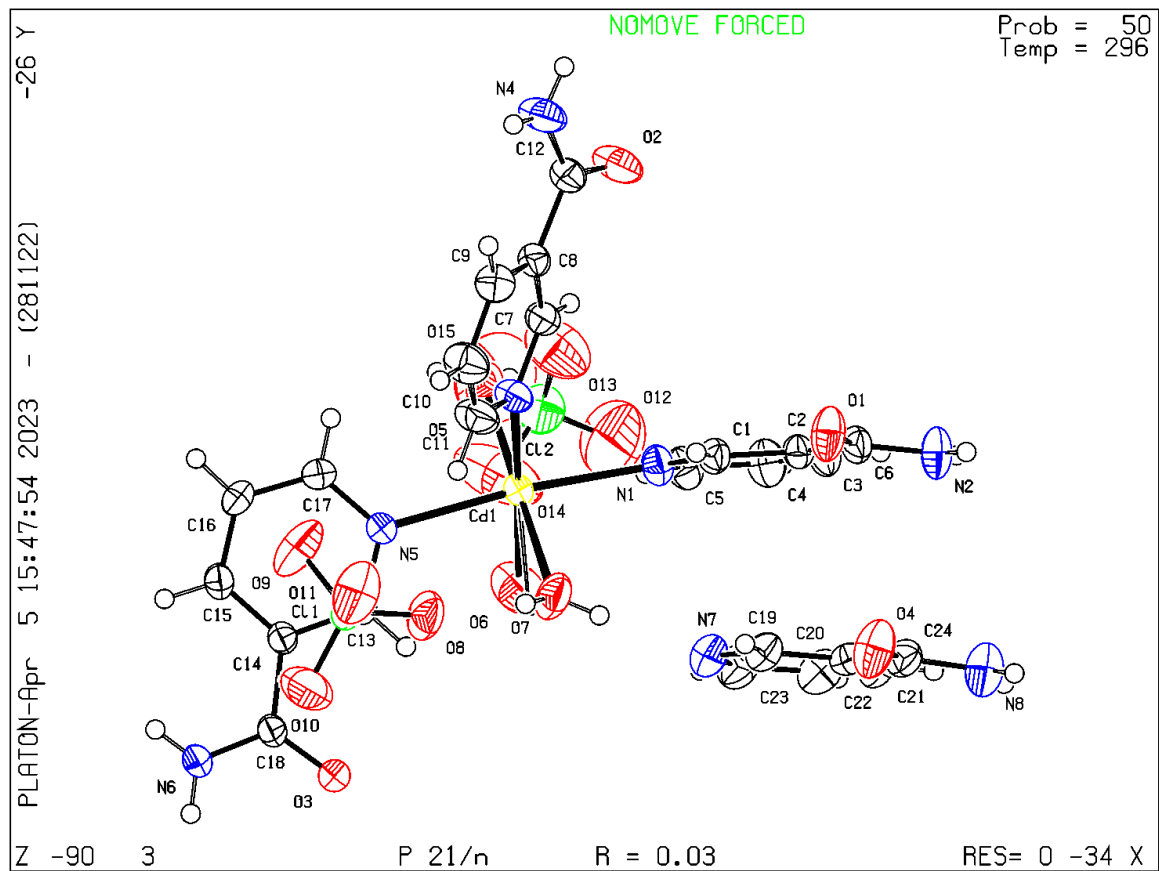

Supplement: s1 [file s1 › 3-checkcif.pdf]
