# Supplementary material for: The Anion Impact on Dimensionality of Cadmium(II) Complexes with Nicotinamide
Source: MDPI journal article supplement (doi:10.3390/chemistry5020092), 2023-06-01
Supplement: s1 [file s1]

Archive with 7 entries (7 files):
- 1-checkcif.pdf
- 1.cif
- 2-checkcif.pdf
- 2.cif
- 3-checkcif.pdf
- 3.cif
- supplementary materials.pdf
