# Supplementary material for: The Anion Impact on Dimensionality of Cadmium(II) Complexes with Nicotinamide
Source: MDPI journal article supplement (doi:10.3390/chemistry5020092), 2023-06-01
Supplement: s1 [file s1 › 1.cif]

 
data_1
 
_audit_creation_method            SHELXL-97
_chemical_name_systematic
;
 ?
;
_chemical_name_common             ?
_chemical_melting_point           ?
_chemical_formula_moiety          ?
_chemical_formula_sum
 'C32 H36 Cd2 N8 O12'
_chemical_formula_weight          949.51
 
loop_
 _atom_type_symbol
 _atom_type_description
 _atom_type_scat_dispersion_real
 _atom_type_scat_dispersion_imag
 _atom_type_scat_source
 'C'  'C'   0.0033   0.0016
 'International Tables Vol C Tables 4.2.6.8 and 6.1.1.4'
 'H'  'H'   0.0000   0.0000
 'International Tables Vol C Tables 4.2.6.8 and 6.1.1.4'
 'Cd'  'Cd'  -0.8075   1.2024
 'International Tables Vol C Tables 4.2.6.8 and 6.1.1.4'
 'N'  'N'   0.0061   0.0033
 'International Tables Vol C Tables 4.2.6.8 and 6.1.1.4'
 'O'  'O'   0.0106   0.0060
 'International Tables Vol C Tables 4.2.6.8 and 6.1.1.4'
 
_symmetry_cell_setting            monoclinic
_symmetry_space_group_name_H-M    'P 21/n'
 
loop_
 _symmetry_equiv_pos_as_xyz
 'x, y, z'
 '-x+1/2, y+1/2, -z+1/2'
 '-x, -y, -z'
 'x-1/2, -y-1/2, z-1/2'
 
_cell_length_a                    11.2351(2)
_cell_length_b                    14.8801(2)
_cell_length_c                    12.5650(3)
_cell_angle_alpha                 90.00
_cell_angle_beta                  103.108(2)
_cell_angle_gamma                 90.00
_cell_volume                      2045.88(7)
_cell_formula_units_Z             2
_cell_measurement_temperature     296(2)
_cell_measurement_reflns_used     8672
_cell_measurement_theta_min       4.1254
_cell_measurement_theta_max       33.0245
 
_exptl_crystal_description        prism
_exptl_crystal_colour             colourless
_exptl_crystal_size_max           ?
_exptl_crystal_size_mid           ?
_exptl_crystal_size_min           ?
_exptl_crystal_density_meas       ?
_exptl_crystal_density_diffrn     1.541
_exptl_crystal_density_method     'not measured'
_exptl_crystal_F_000              952
_exptl_absorpt_coefficient_mu     1.104
_exptl_absorpt_correction_type    multi-scan
_exptl_absorpt_correction_T_min   0.74532
_exptl_absorpt_correction_T_max   1.00000
_exptl_absorpt_process_details    
;
CrysAlisPro, Oxford Diffraction Ltd.,
Version 1.171.33.55 (release 05-01-2010 CrysAlis171 .NET)
(compiled Jan  5 2010,16:28:46)
Empirical absorption correction using spherical harmonics,
 implemented in SCALE3 ABSPACK scaling algorithm.
;
 
_exptl_special_details
;
 ?
;
 
_diffrn_ambient_temperature       296(2)
_diffrn_radiation_wavelength      0.71073
_diffrn_radiation_type            MoK\a
_diffrn_radiation_source          'fine-focus sealed tube'
_diffrn_radiation_monochromator   graphite
_diffrn_measurement_device_type   
'Oxford Diffraction Xcalibur2 diffractometer with Sapphire 3 CCD detector'
_diffrn_measurement_method        ?
_diffrn_detector_area_resol_mean  ?
_diffrn_standards_number          ?
_diffrn_standards_interval_count  ?
_diffrn_standards_interval_time   ?
_diffrn_standards_decay_%         ?
_diffrn_reflns_number             39756
_diffrn_reflns_av_R_equivalents   0.0174
_diffrn_reflns_av_sigmaI/netI     0.0111
_diffrn_reflns_limit_h_min        -15
_diffrn_reflns_limit_h_max        15
_diffrn_reflns_limit_k_min        -20
_diffrn_reflns_limit_k_max        20
_diffrn_reflns_limit_l_min        -17
_diffrn_reflns_limit_l_max        17
_diffrn_reflns_theta_min          4.31
_diffrn_reflns_theta_max          30.00
_reflns_number_total              5961
_reflns_number_gt                 5105
_reflns_threshold_expression      >2sigma(I)
 
_computing_data_collection        ?
_computing_cell_refinement        ?
_computing_data_reduction         ?
_computing_structure_solution     ?
_computing_structure_refinement   'SHELXL-97 (Sheldrick, 1997)'
_computing_molecular_graphics     ?
_computing_publication_material   ?
 
_refine_special_details
;
 Refinement of F^2^ against ALL reflections.  The weighted R-factor wR and
 goodness of fit S are based on F^2^, conventional R-factors R are based
 on F, with F set to zero for negative F^2^. The threshold expression of
 F^2^ > 2sigma(F^2^) is used only for calculating R-factors(gt) etc. and is
 not relevant to the choice of reflections for refinement.  R-factors based
 on F^2^ are statistically about twice as large as those based on F, and R-
 factors based on ALL data will be even larger.
;
 
_refine_ls_structure_factor_coef  Fsqd
_refine_ls_matrix_type            full
_refine_ls_weighting_scheme       calc
_refine_ls_weighting_details
 'calc w=1/[\s^2^(Fo^2^)+(0.1113P)^2^+2.1053P] where P=(Fo^2^+2Fc^2^)/3'
_atom_sites_solution_primary      direct
_atom_sites_solution_secondary    difmap
_atom_sites_solution_hydrogens    geom
_refine_ls_hydrogen_treatment     mixed
_refine_ls_extinction_method      none
_refine_ls_extinction_coef        ?
_refine_ls_number_reflns          5961
_refine_ls_number_parameters      260
_refine_ls_number_restraints      4
_refine_ls_R_factor_all           0.0549
_refine_ls_R_factor_gt            0.0485
_refine_ls_wR_factor_ref          0.1714
_refine_ls_wR_factor_gt           0.1667
_refine_ls_goodness_of_fit_ref    1.084
_refine_ls_restrained_S_all       1.084
_refine_ls_shift/su_max           0.049
_refine_ls_shift/su_mean          0.001
 
loop_
 _atom_site_label
 _atom_site_type_symbol
 _atom_site_fract_x
 _atom_site_fract_y
 _atom_site_fract_z
 _atom_site_U_iso_or_equiv
 _atom_site_adp_type
 _atom_site_occupancy
 _atom_site_symmetry_multiplicity
 _atom_site_calc_flag
 _atom_site_refinement_flags
 _atom_site_disorder_assembly
 _atom_site_disorder_group
Cd1 Cd 0.49454(2) 0.975354(15) 0.15374(2) 0.03951(12) Uani 1 1 d . . .
O1 O 0.4452(3) 0.59614(19) 0.1122(3) 0.0560(8) Uani 1 1 d . . .
O2 O 0.5051(3) 1.3578(2) 0.1489(3) 0.0618(10) Uani 1 1 d . . .
O3 O 0.4475(3) 0.9135(2) 0.3216(3) 0.0509(7) Uani 1 1 d . . .
O4 O 0.6192(3) 0.9856(2) 0.3318(3) 0.0557(7) Uani 1 1 d . . .
O5 O 0.6077(6) 1.0567(4) 0.0590(8) 0.155(4) Uani 1 1 d . . .
O6 O 0.3143(3) 0.8968(3) 0.0711(3) 0.0653(8) Uani 1 1 d . . .
N1 N 0.6078(3) 0.84606(18) 0.1348(3) 0.0396(6) Uani 1 1 d . . .
N2 N 0.6225(3) 0.52308(19) 0.1189(4) 0.0493(8) Uani 1 1 d D . .
N3 N 0.3808(3) 1.10214(19) 0.1695(3) 0.0401(6) Uani 1 1 d . . .
N4 N 0.3214(3) 1.4212(2) 0.1441(4) 0.0508(8) Uani 1 1 d D . .
C1 C 0.5580(3) 0.7640(2) 0.1279(3) 0.0371(6) Uani 1 1 d . . .
H1 H 0.4758 0.7589 0.1290 0.045 Uiso 1 1 calc R . .
C2 C 0.6234(3) 0.6857(2) 0.1191(3) 0.0346(6) Uani 1 1 d . . .
C3 C 0.7455(3) 0.6942(2) 0.1174(3) 0.0428(7) Uani 1 1 d . . .
H3 H 0.7917 0.6435 0.1108 0.051 Uiso 1 1 calc R . .
C4 C 0.7981(3) 0.7783(3) 0.1257(4) 0.0493(9) Uani 1 1 d . . .
H4 H 0.8803 0.7853 0.1254 0.059 Uiso 1 1 calc R . .
C5 C 0.7260(4) 0.8523(2) 0.1344(4) 0.0466(8) Uani 1 1 d . . .
H5 H 0.7618 0.9090 0.1403 0.056 Uiso 1 1 calc R . .
C6 C 0.5573(3) 0.5976(2) 0.1159(3) 0.0384(7) Uani 1 1 d . . .
C7 C 0.4165(3) 1.1863(2) 0.1587(3) 0.0386(7) Uani 1 1 d . . .
H7 H 0.4911 1.1956 0.1400 0.046 Uiso 1 1 calc R . .
C8 C 0.3482(3) 1.2607(2) 0.1740(3) 0.0366(6) Uani 1 1 d . . .
C9 C 0.2386(5) 1.2464(3) 0.2035(5) 0.0641(13) Uani 1 1 d . . .
H9 H 0.1902 1.2946 0.2147 0.077 Uiso 1 1 calc R . .
C10 C 0.2021(5) 1.1597(3) 0.2160(7) 0.081(2) Uani 1 1 d . . .
H10 H 0.1297 1.1484 0.2377 0.098 Uiso 1 1 calc R . .
C11 C 0.2743(4) 1.0898(3) 0.1960(5) 0.0590(12) Uani 1 1 d . . .
H11 H 0.2472 1.0313 0.2014 0.071 Uiso 1 1 calc R . .
C12 C 0.3981(3) 1.3513(2) 0.1554(3) 0.0420(7) Uani 1 1 d . . .
C13 C 0.5516(4) 0.9364(2) 0.3741(3) 0.0450(8) Uani 1 1 d . . .
C15 C 0.3177(4) 0.8970(3) -0.0260(4) 0.0557(10) Uani 1 1 d . . .
C14 C 0.5993(7) 0.9028(5) 0.4882(5) 0.0814(17) Uani 1 1 d . . .
H14A H 0.6797 0.9265 0.5165 0.122 Uiso 1 1 calc R . .
H14B H 0.6028 0.8383 0.4876 0.122 Uiso 1 1 calc R . .
H14C H 0.5459 0.9219 0.5336 0.122 Uiso 1 1 calc R . .
C16 C 0.2355(10) 0.8342(9) -0.0992(9) 0.159(5) Uani 1 1 d . . .
H16A H 0.1839 0.8042 -0.0591 0.239 Uiso 1 1 calc R . .
H16B H 0.2834 0.7906 -0.1273 0.239 Uiso 1 1 calc R . .
H16C H 0.1859 0.8671 -0.1588 0.239 Uiso 1 1 calc R . .
H12N H 0.594(4) 0.4693(18) 0.125(4) 0.044(12) Uiso 1 1 d D . .
H22N H 0.670(7) 0.522(6) 0.074(6) 0.12(3) Uiso 1 1 d D . .
H24N H 0.245(2) 1.415(4) 0.144(5) 0.059(15) Uiso 1 1 d D . .
H14N H 0.302(13) 1.466(5) 0.098(8) 0.17(5) Uiso 1 1 d D . .
 
loop_
 _atom_site_aniso_label
 _atom_site_aniso_U_11
 _atom_site_aniso_U_22
 _atom_site_aniso_U_33
 _atom_site_aniso_U_23
 _atom_site_aniso_U_13
 _atom_site_aniso_U_12
Cd1 0.04498(18) 0.02343(15) 0.05547(19) 0.00152(8) 0.02256(12) 0.00233(8)
O1 0.0401(13) 0.0333(12) 0.099(2) -0.0077(14) 0.0260(15) -0.0010(10)
O2 0.0481(16) 0.0305(14) 0.110(3) 0.0032(14) 0.0257(18) -0.0002(10)
O3 0.0446(14) 0.0492(15) 0.0582(16) -0.0008(12) 0.0102(12) -0.0137(12)
O4 0.0394(14) 0.0491(16) 0.078(2) -0.0105(14) 0.0129(14) -0.0103(11)
O5 0.143(5) 0.076(3) 0.302(10) 0.097(5) 0.169(6) 0.046(3)
O6 0.0614(19) 0.066(2) 0.067(2) -0.0131(16) 0.0102(16) -0.0013(16)
N1 0.0407(14) 0.0247(12) 0.0563(17) -0.0014(11) 0.0169(12) 0.0011(10)
N2 0.0391(16) 0.0265(14) 0.085(3) -0.0037(13) 0.0190(16) 0.0007(10)
N3 0.0449(15) 0.0248(12) 0.0556(17) 0.0051(11) 0.0218(13) 0.0031(10)
N4 0.0488(17) 0.0264(13) 0.081(2) 0.0012(14) 0.0221(17) 0.0069(12)
C1 0.0352(14) 0.0261(13) 0.0521(18) 0.0016(12) 0.0141(13) 0.0027(11)
C2 0.0351(14) 0.0249(13) 0.0446(16) -0.0008(11) 0.0105(12) 0.0015(11)
C3 0.0367(16) 0.0312(15) 0.062(2) -0.0034(14) 0.0144(15) 0.0064(12)
C4 0.0352(16) 0.0380(18) 0.077(3) -0.0021(17) 0.0182(17) -0.0033(14)
C5 0.0445(18) 0.0295(15) 0.068(2) -0.0041(15) 0.0176(17) -0.0059(13)
C6 0.0362(15) 0.0260(13) 0.0554(19) -0.0042(13) 0.0153(14) -0.0017(11)
C7 0.0379(15) 0.0269(14) 0.0550(19) 0.0017(13) 0.0187(14) 0.0034(11)
C8 0.0404(15) 0.0245(13) 0.0475(17) 0.0019(12) 0.0156(13) 0.0061(11)
C9 0.067(3) 0.0355(18) 0.107(4) 0.013(2) 0.055(3) 0.0162(18)
C10 0.075(3) 0.040(2) 0.156(6) 0.019(3) 0.081(4) 0.010(2)
C11 0.058(2) 0.0318(17) 0.100(4) 0.0156(19) 0.047(2) 0.0043(16)
C12 0.0430(17) 0.0242(13) 0.060(2) 0.0001(13) 0.0152(15) 0.0033(12)
C13 0.0470(19) 0.0340(17) 0.054(2) -0.0076(14) 0.0114(15) 0.0003(14)
C15 0.047(2) 0.045(2) 0.081(3) 0.014(2) 0.026(2) 0.0016(16)
C14 0.098(4) 0.081(4) 0.059(3) 0.000(3) 0.004(3) 0.015(3)
C16 0.136(8) 0.217(13) 0.111(7) -0.088(8) -0.001(6) -0.030(8)
 
_geom_special_details
;
 All esds (except the esd in the dihedral angle between two l.s. planes)
 are estimated using the full covariance matrix.  The cell esds are taken
 into account individually in the estimation of esds in distances, angles
 and torsion angles; correlations between esds in cell parameters are only
 used when they are defined by crystal symmetry.  An approximate (isotropic)
 treatment of cell esds is used for estimating esds involving l.s. planes.
;
 
loop_
 _geom_bond_atom_site_label_1
 _geom_bond_atom_site_label_2
 _geom_bond_distance
 _geom_bond_site_symmetry_2
 _geom_bond_publ_flag
Cd1 O5 2.277(4) . ?
Cd1 N3 2.312(3) . ?
Cd1 N1 2.348(3) . ?
Cd1 O4 2.360(4) . ?
Cd1 O6 2.365(4) . ?
Cd1 O3 2.465(3) . ?
Cd1 C13 2.758(4) . ?
O1 C6 1.250(4) . ?
O2 C12 1.228(5) . ?
O3 C13 1.253(5) . ?
O4 C13 1.256(5) . ?
O5 C15 1.228(6) 3_675 ?
O6 C15 1.229(6) . ?
N1 C5 1.333(5) . ?
N1 C1 1.338(4) . ?
N2 C6 1.325(4) . ?
N3 C11 1.325(5) . ?
N3 C7 1.331(4) . ?
N4 C12 1.338(4) . ?
C1 C2 1.394(4) . ?
C2 C3 1.383(5) . ?
C2 C6 1.503(4) . ?
C3 C4 1.379(5) . ?
C4 C5 1.385(5) . ?
C7 C8 1.386(4) . ?
C8 C9 1.381(5) . ?
C8 C12 1.499(5) . ?
C9 C10 1.373(6) . ?
C10 C11 1.377(6) . ?
C13 C14 1.499(7) . ?
C15 O5 1.228(6) 3_675 ?
C15 C16 1.478(10) . ?
 
loop_
 _geom_angle_atom_site_label_1
 _geom_angle_atom_site_label_2
 _geom_angle_atom_site_label_3
 _geom_angle
 _geom_angle_site_symmetry_1
 _geom_angle_site_symmetry_3
 _geom_angle_publ_flag
O5 Cd1 N3 89.78(14) . . ?
O5 Cd1 N1 90.15(14) . . ?
N3 Cd1 N1 178.99(12) . . ?
O5 Cd1 O4 100.3(3) . . ?
N3 Cd1 O4 95.00(12) . . ?
N1 Cd1 O4 86.00(11) . . ?
O5 Cd1 O6 123.9(3) . . ?
N3 Cd1 O6 90.33(12) . . ?
N1 Cd1 O6 88.87(12) . . ?
O4 Cd1 O6 135.50(13) . . ?
O5 Cd1 O3 154.0(3) . . ?
N3 Cd1 O3 90.09(11) . . ?
N1 Cd1 O3 90.41(11) . . ?
O4 Cd1 O3 53.81(10) . . ?
O6 Cd1 O3 82.11(12) . . ?
O5 Cd1 C13 127.3(3) . . ?
N3 Cd1 C13 95.32(11) . . ?
N1 Cd1 C13 85.52(11) . . ?
O4 Cd1 C13 27.00(12) . . ?
O6 Cd1 C13 108.54(13) . . ?
O3 Cd1 C13 27.02(11) . . ?
C13 O3 Cd1 89.6(3) . . ?
C13 O4 Cd1 94.4(2) . . ?
C15 O5 Cd1 168.5(8) 3_675 . ?
C15 O6 Cd1 102.6(3) . . ?
C5 N1 C1 117.8(3) . . ?
C5 N1 Cd1 120.4(2) . . ?
C1 N1 Cd1 121.7(2) . . ?
C11 N3 C7 117.8(3) . . ?
C11 N3 Cd1 117.1(2) . . ?
C7 N3 Cd1 125.0(2) . . ?
N1 C1 C2 123.2(3) . . ?
C3 C2 C1 117.9(3) . . ?
C3 C2 C6 124.4(3) . . ?
C1 C2 C6 117.7(3) . . ?
C4 C3 C2 119.4(3) . . ?
C3 C4 C5 118.6(3) . . ?
N1 C5 C4 123.1(3) . . ?
O1 C6 N2 122.2(3) . . ?
O1 C6 C2 120.2(3) . . ?
N2 C6 C2 117.6(3) . . ?
N3 C7 C8 123.2(3) . . ?
C9 C8 C7 118.0(3) . . ?
C9 C8 C12 124.7(3) . . ?
C7 C8 C12 117.3(3) . . ?
C10 C9 C8 118.9(4) . . ?
C9 C10 C11 119.1(4) . . ?
N3 C11 C10 122.9(4) . . ?
O2 C12 N4 123.3(3) . . ?
O2 C12 C8 119.2(3) . . ?
N4 C12 C8 117.5(3) . . ?
O3 C13 O4 121.2(4) . . ?
O3 C13 C14 120.1(5) . . ?
O4 C13 C14 118.7(4) . . ?
O3 C13 Cd1 63.4(2) . . ?
O4 C13 Cd1 58.6(2) . . ?
C14 C13 Cd1 169.1(4) . . ?
O5 C15 O6 120.9(7) 3_675 . ?
O5 C15 C16 121.5(8) 3_675 . ?
O6 C15 C16 117.4(6) . . ?
 
_diffrn_measured_fraction_theta_max    0.997
_diffrn_reflns_theta_full              30.00
_diffrn_measured_fraction_theta_full   0.997
_refine_diff_density_max    3.141
_refine_diff_density_min   -0.876
_refine_diff_density_rms    0.148
