# Supplementary material for: The Anion Impact on Dimensionality of Cadmium(II) Complexes with Nicotinamide
Source: MDPI journal article supplement (doi:10.3390/chemistry5020092), 2023-06-01
Supplement: s1 [file s1 › 2.cif]

 
data_2
 
_audit_creation_method            SHELXL-97
_chemical_name_systematic
;
 ?
;
_chemical_name_common             ?
_chemical_melting_point           ?
_chemical_formula_moiety          ?
_chemical_formula_sum
 'C24 H24 Cd Cl2 N8 O12'
_chemical_formula_weight          799.81
 
loop_
 _atom_type_symbol
 _atom_type_description
 _atom_type_scat_dispersion_real
 _atom_type_scat_dispersion_imag
 _atom_type_scat_source
 'C'  'C'   0.0033   0.0016
 'International Tables Vol C Tables 4.2.6.8 and 6.1.1.4'
 'H'  'H'   0.0000   0.0000
 'International Tables Vol C Tables 4.2.6.8 and 6.1.1.4'
 'Cd'  'Cd'  -0.8075   1.2024
 'International Tables Vol C Tables 4.2.6.8 and 6.1.1.4'
 'Cl'  'Cl'   0.1484   0.1585
 'International Tables Vol C Tables 4.2.6.8 and 6.1.1.4'
 'N'  'N'   0.0061   0.0033
 'International Tables Vol C Tables 4.2.6.8 and 6.1.1.4'
 'O'  'O'   0.0106   0.0060
 'International Tables Vol C Tables 4.2.6.8 and 6.1.1.4'
 
_symmetry_cell_setting            monoclinic
_symmetry_space_group_name_H-M    'P 21/c'
 
loop_
 _symmetry_equiv_pos_as_xyz
 'x, y, z'
 '-x, y+1/2, -z+1/2'
 '-x, -y, -z'
 'x, -y-1/2, z-1/2'
 
_cell_length_a                    7.55240(10)
_cell_length_b                    12.9826(2)
_cell_length_c                    16.0880(2)
_cell_angle_alpha                 90.00
_cell_angle_beta                  92.2960(10)
_cell_angle_gamma                 90.00
_cell_volume                      1576.16(4)
_cell_formula_units_Z             2
_cell_measurement_temperature     296(2)
_cell_measurement_reflns_used     10253
_cell_measurement_theta_min       4.1023
_cell_measurement_theta_max       33.9721
 
_exptl_crystal_description        prism
_exptl_crystal_colour             colourless
_exptl_crystal_size_max           ?
_exptl_crystal_size_mid           ?
_exptl_crystal_size_min           ?
_exptl_crystal_density_meas       ?
_exptl_crystal_density_diffrn     1.685
_exptl_crystal_density_method     'not measured'
_exptl_crystal_F_000              804
_exptl_absorpt_coefficient_mu     0.936
_exptl_absorpt_correction_type    multi-scan
_exptl_absorpt_correction_T_min   0.72190
_exptl_absorpt_correction_T_max   1.00000
_exptl_absorpt_process_details    
;
CrysAlisPro, Oxford Diffraction Ltd.,
Version 1.171.33.55 (release 05-01-2010 CrysAlis171 .NET)
(compiled Jan  5 2010,16:28:46)
Empirical absorption correction using spherical harmonics,
 implemented in SCALE3 ABSPACK scaling algorithm.
; 
_exptl_special_details
;
 ?
;
 
_diffrn_ambient_temperature       296(2)
_diffrn_radiation_wavelength      0.71073
_diffrn_radiation_type            MoK\a
_diffrn_radiation_source          'fine-focus sealed tube'
_diffrn_radiation_monochromator   graphite
_diffrn_measurement_device_type   
'Oxford Diffraction Xcalibur2 diffractometer with Sapphire 3 CCD detector'
_diffrn_measurement_method        ?
_diffrn_detector_area_resol_mean  ?
_diffrn_standards_number          ?
_diffrn_standards_interval_count  ?
_diffrn_standards_interval_time   ?
_diffrn_standards_decay_%         ?
_diffrn_reflns_number             18345
_diffrn_reflns_av_R_equivalents   0.0200
_diffrn_reflns_av_sigmaI/netI     0.0194
_diffrn_reflns_limit_h_min        -10
_diffrn_reflns_limit_h_max        10
_diffrn_reflns_limit_k_min        -18
_diffrn_reflns_limit_k_max        18
_diffrn_reflns_limit_l_min        -22
_diffrn_reflns_limit_l_max        22
_diffrn_reflns_theta_min          3.78
_diffrn_reflns_theta_max          30.00
_reflns_number_total              4599
_reflns_number_gt                 3767
_reflns_threshold_expression      >2sigma(I)
 
_computing_data_collection        ?
_computing_cell_refinement        ?
_computing_data_reduction         ?
_computing_structure_solution     ?
_computing_structure_refinement   'SHELXL-97 (Sheldrick, 1997)'
_computing_molecular_graphics     ?
_computing_publication_material   ?
 
_refine_special_details
;
 Refinement of F^2^ against ALL reflections.  The weighted R-factor wR and
 goodness of fit S are based on F^2^, conventional R-factors R are based
 on F, with F set to zero for negative F^2^. The threshold expression of
 F^2^ > 2sigma(F^2^) is used only for calculating R-factors(gt) etc. and is
 not relevant to the choice of reflections for refinement.  R-factors based
 on F^2^ are statistically about twice as large as those based on F, and R-
 factors based on ALL data will be even larger.
;
 
_refine_ls_structure_factor_coef  Fsqd
_refine_ls_matrix_type            full
_refine_ls_weighting_scheme       calc
_refine_ls_weighting_details
 'calc w=1/[\s^2^(Fo^2^)+(0.0521P)^2^+0.8088P] where P=(Fo^2^+2Fc^2^)/3'
_atom_sites_solution_primary      direct
_atom_sites_solution_secondary    difmap
_atom_sites_solution_hydrogens    geom
_refine_ls_hydrogen_treatment     mixed
_refine_ls_extinction_method      none
_refine_ls_extinction_coef        ?
_refine_ls_number_reflns          4599
_refine_ls_number_parameters      230
_refine_ls_number_restraints      0
_refine_ls_R_factor_all           0.0457
_refine_ls_R_factor_gt            0.0331
_refine_ls_wR_factor_ref          0.0956
_refine_ls_wR_factor_gt           0.0918
_refine_ls_goodness_of_fit_ref    1.076
_refine_ls_restrained_S_all       1.076
_refine_ls_shift/su_max           0.000
_refine_ls_shift/su_mean          0.000
 
loop_
 _atom_site_label
 _atom_site_type_symbol
 _atom_site_fract_x
 _atom_site_fract_y
 _atom_site_fract_z
 _atom_site_U_iso_or_equiv
 _atom_site_adp_type
 _atom_site_occupancy
 _atom_site_symmetry_multiplicity
 _atom_site_calc_flag
 _atom_site_refinement_flags
 _atom_site_disorder_assembly
 _atom_site_disorder_group
Cd1 Cd 0.5000 0.0000 0.0000 0.03079(8) Uani 1 2 d S . .
Cl1 Cl 0.28407(9) -0.13706(5) 0.26948(4) 0.04906(16) Uani 1 1 d . . .
O1 O 0.7538(2) 0.02658(15) 0.08429(10) 0.0427(4) Uani 1 1 d . . .
O2 O 0.1447(4) -0.4612(2) 0.09293(15) 0.0942(11) Uani 1 1 d . . .
O3 O 0.2865(3) -0.21375(16) 0.33352(13) 0.0617(5) Uani 1 1 d . . .
O4 O 0.1708(5) -0.1683(3) 0.20071(16) 0.0989(10) Uani 1 1 d . . .
O5 O 0.2156(7) -0.0449(3) 0.2999(2) 0.1278(15) Uani 1 1 d . . .
O6 O 0.4522(4) -0.1205(3) 0.2399(3) 0.1412(16) Uani 1 1 d . . .
N1 N 0.3027(2) 0.06578(14) 0.09598(11) 0.0322(4) Uani 1 1 d . . .
N2 N 0.7600(3) 0.0209(2) 0.22456(14) 0.0458(5) Uani 1 1 d . . .
N3 N 0.4980(3) -0.17268(16) 0.04129(12) 0.0395(4) Uani 1 1 d . . .
N4 N 0.0840(4) -0.3749(2) -0.02586(17) 0.0733(9) Uani 1 1 d . . .
C1 C 0.1338(3) 0.03565(17) 0.10001(12) 0.0283(4) Uani 1 1 d . . .
H1 H 0.0931 -0.0169 0.0649 0.034 Uiso 1 1 calc R . .
C2 C 0.0170(2) 0.07919(15) 0.15413(12) 0.0274(4) Uani 1 1 d . . .
C3 C 0.0763(3) 0.15872(18) 0.20555(14) 0.0378(5) Uani 1 1 d . . .
H3 H 0.0019 0.1886 0.2434 0.045 Uiso 1 1 calc R . .
C4 C 0.2480(3) 0.1923(2) 0.19908(16) 0.0451(6) Uani 1 1 d . . .
H4 H 0.2901 0.2473 0.2312 0.054 Uiso 1 1 calc R . .
C5 C 0.3568(3) 0.14413(19) 0.14494(15) 0.0402(5) Uani 1 1 d . . .
H5 H 0.4732 0.1668 0.1421 0.048 Uiso 1 1 calc R . .
C6 C 0.8320(3) 0.04019(18) 0.15287(13) 0.0302(4) Uani 1 1 d . . .
C7 C 0.3522(3) -0.23053(19) 0.03246(14) 0.0402(5) Uani 1 1 d . . .
H7 H 0.2485 -0.1999 0.0114 0.048 Uiso 1 1 calc R . .
C8 C 0.3483(4) -0.3340(2) 0.05322(15) 0.0467(6) Uani 1 1 d . . .
C9 C 0.5042(4) -0.3796(2) 0.08397(19) 0.0583(7) Uani 1 1 d . . .
H9 H 0.5051 -0.4483 0.1002 0.070 Uiso 1 1 calc R . .
C10 C 0.6571(4) -0.3219(3) 0.0901(2) 0.0604(7) Uani 1 1 d . . .
H10 H 0.7640 -0.3517 0.1077 0.073 Uiso 1 1 calc R . .
C11 C 0.6484(4) -0.2191(2) 0.06944(17) 0.0502(6) Uani 1 1 d . . .
H11 H 0.7511 -0.1798 0.0752 0.060 Uiso 1 1 calc R . .
C12 C 0.1828(5) -0.3954(2) 0.04152(17) 0.0604(8) Uani 1 1 d . . .
H22N H 0.820(5) 0.038(3) 0.273(2) 0.059(9) Uiso 1 1 d . . .
H12N H 0.657(5) -0.004(2) 0.227(2) 0.053(10) Uiso 1 1 d . . .
H14N H 0.140(5) -0.347(3) -0.067(2) 0.083(12) Uiso 1 1 d . . .
H24N H -0.015(6) -0.417(3) -0.045(2) 0.084(12) Uiso 1 1 d . . .
 
loop_
 _atom_site_aniso_label
 _atom_site_aniso_U_11
 _atom_site_aniso_U_22
 _atom_site_aniso_U_33
 _atom_site_aniso_U_23
 _atom_site_aniso_U_13
 _atom_site_aniso_U_12
Cd1 0.01905(10) 0.03886(13) 0.03445(12) -0.00259(8) 0.00085(7) -0.00651(8)
Cl1 0.0470(3) 0.0433(3) 0.0572(4) 0.0096(3) 0.0065(3) -0.0002(3)
O1 0.0252(7) 0.0679(11) 0.0345(8) -0.0074(7) -0.0043(6) -0.0095(7)
O2 0.125(2) 0.0990(18) 0.0568(13) 0.0305(14) -0.0215(14) -0.0783(19)
O3 0.0689(13) 0.0533(12) 0.0631(13) 0.0172(10) 0.0065(10) 0.0172(10)
O4 0.133(3) 0.096(2) 0.0655(16) 0.0197(14) -0.0145(16) -0.0433(19)
O5 0.225(5) 0.0729(19) 0.086(2) 0.0087(16) 0.001(2) 0.066(3)
O6 0.0641(18) 0.183(4) 0.178(4) 0.080(3) 0.020(2) -0.029(2)
N1 0.0227(7) 0.0403(9) 0.0335(8) -0.0024(7) 0.0010(6) -0.0053(7)
N2 0.0331(10) 0.0694(15) 0.0350(10) 0.0014(9) 0.0035(8) -0.0089(10)
N3 0.0382(10) 0.0415(10) 0.0388(10) 0.0035(8) 0.0033(8) -0.0092(8)
N4 0.085(2) 0.082(2) 0.0507(14) 0.0170(13) -0.0121(14) -0.0502(17)
C1 0.0256(9) 0.0316(9) 0.0275(9) -0.0032(7) -0.0004(7) -0.0041(7)
C2 0.0221(8) 0.0331(10) 0.0267(8) -0.0008(7) -0.0027(6) -0.0004(7)
C3 0.0322(10) 0.0411(12) 0.0397(11) -0.0125(9) -0.0027(8) 0.0022(9)
C4 0.0388(12) 0.0448(13) 0.0513(14) -0.0180(11) -0.0045(10) -0.0109(10)
C5 0.0280(10) 0.0482(13) 0.0441(12) -0.0056(10) -0.0019(8) -0.0128(9)
C6 0.0211(8) 0.0370(10) 0.0325(10) -0.0038(8) 0.0007(7) 0.0001(8)
C7 0.0397(11) 0.0455(12) 0.0355(11) 0.0015(9) 0.0022(9) -0.0118(10)
C8 0.0576(15) 0.0461(13) 0.0363(12) 0.0018(10) 0.0020(10) -0.0192(12)
C9 0.078(2) 0.0426(14) 0.0539(16) 0.0075(12) -0.0047(14) -0.0084(14)
C10 0.0602(17) 0.0570(17) 0.0633(17) 0.0116(14) -0.0057(14) 0.0041(14)
C11 0.0431(13) 0.0524(15) 0.0547(15) 0.0066(12) -0.0031(11) -0.0076(11)
C12 0.077(2) 0.0612(17) 0.0423(13) 0.0065(12) -0.0029(13) -0.0357(16)
 
_geom_special_details
;
 All esds (except the esd in the dihedral angle between two l.s. planes)
 are estimated using the full covariance matrix.  The cell esds are taken
 into account individually in the estimation of esds in distances, angles
 and torsion angles; correlations between esds in cell parameters are only
 used when they are defined by crystal symmetry.  An approximate (isotropic)
 treatment of cell esds is used for estimating esds involving l.s. planes.
;
 
loop_
 _geom_bond_atom_site_label_1
 _geom_bond_atom_site_label_2
 _geom_bond_distance
 _geom_bond_site_symmetry_2
 _geom_bond_publ_flag
Cd1 O1 2.3287(15) . ?
Cd1 O1 2.3287(15) 3_655 ?
Cd1 N3 2.338(2) 3_655 ?
Cd1 N3 2.338(2) . ?
Cd1 N1 2.3493(17) . ?
Cd1 N1 2.3493(17) 3_655 ?
Cl1 O6 1.391(3) . ?
Cl1 O5 1.399(3) . ?
Cl1 O4 1.430(3) . ?
Cl1 O3 1.432(2) . ?
O1 C6 1.243(3) . ?
O2 C12 1.232(3) . ?
N1 C1 1.338(2) . ?
N1 C5 1.340(3) . ?
N2 C6 1.319(3) . ?
N2 H22N 0.92(4) . ?
N2 H12N 0.85(4) . ?
N3 C7 1.336(3) . ?
N3 C11 1.348(3) . ?
N4 C12 1.318(4) . ?
N4 H14N 0.87(4) . ?
N4 H24N 0.96(4) . ?
C1 C2 1.385(3) . ?
C1 H1 0.9300 . ?
C2 C3 1.386(3) . ?
C2 C6 1.486(3) 1_455 ?
C3 C4 1.376(3) . ?
C3 H3 0.9300 . ?
C4 C5 1.372(3) . ?
C4 H4 0.9300 . ?
C5 H5 0.9300 . ?
C6 C2 1.486(3) 1_655 ?
C7 C8 1.384(4) . ?
C7 H7 0.9300 . ?
C8 C9 1.391(4) . ?
C8 C12 1.488(4) . ?
C9 C10 1.377(4) . ?
C9 H9 0.9300 . ?
C10 C11 1.376(4) . ?
C10 H10 0.9300 . ?
C11 H11 0.9300 . ?
 
loop_
 _geom_angle_atom_site_label_1
 _geom_angle_atom_site_label_2
 _geom_angle_atom_site_label_3
 _geom_angle
 _geom_angle_site_symmetry_1
 _geom_angle_site_symmetry_3
 _geom_angle_publ_flag
O1 Cd1 O1 180.00(11) . 3_655 ?
O1 Cd1 N3 90.50(7) . 3_655 ?
O1 Cd1 N3 89.50(7) 3_655 3_655 ?
O1 Cd1 N3 89.50(7) . . ?
O1 Cd1 N3 90.50(7) 3_655 . ?
N3 Cd1 N3 180.0 3_655 . ?
O1 Cd1 N1 95.30(6) . . ?
O1 Cd1 N1 84.70(6) 3_655 . ?
N3 Cd1 N1 81.36(7) 3_655 . ?
N3 Cd1 N1 98.64(7) . . ?
O1 Cd1 N1 84.70(6) . 3_655 ?
O1 Cd1 N1 95.30(6) 3_655 3_655 ?
N3 Cd1 N1 98.64(7) 3_655 3_655 ?
N3 Cd1 N1 81.36(7) . 3_655 ?
N1 Cd1 N1 180.00(10) . 3_655 ?
O6 Cl1 O5 110.0(3) . . ?
O6 Cl1 O4 107.7(2) . . ?
O5 Cl1 O4 107.2(2) . . ?
O6 Cl1 O3 111.62(19) . . ?
O5 Cl1 O3 109.69(17) . . ?
O4 Cl1 O3 110.46(15) . . ?
C6 O1 Cd1 152.69(15) . . ?
C1 N1 C5 117.55(18) . . ?
C1 N1 Cd1 123.82(14) . . ?
C5 N1 Cd1 118.38(14) . . ?
C6 N2 H22N 119(2) . . ?
C6 N2 H12N 122(3) . . ?
H22N N2 H12N 119(3) . . ?
C7 N3 C11 117.7(2) . . ?
C7 N3 Cd1 121.58(17) . . ?
C11 N3 Cd1 120.60(16) . . ?
C12 N4 H14N 115(3) . . ?
C12 N4 H24N 124(2) . . ?
H14N N4 H24N 113(3) . . ?
N1 C1 C2 122.93(19) . . ?
N1 C1 H1 118.5 . . ?
C2 C1 H1 118.5 . . ?
C1 C2 C3 118.75(18) . . ?
C1 C2 C6 118.36(18) . 1_455 ?
C3 C2 C6 122.87(18) . 1_455 ?
C4 C3 C2 118.3(2) . . ?
C4 C3 H3 120.9 . . ?
C2 C3 H3 120.9 . . ?
C5 C4 C3 119.6(2) . . ?
C5 C4 H4 120.2 . . ?
C3 C4 H4 120.2 . . ?
N1 C5 C4 122.8(2) . . ?
N1 C5 H5 118.6 . . ?
C4 C5 H5 118.6 . . ?
O1 C6 N2 123.5(2) . . ?
O1 C6 C2 118.27(18) . 1_655 ?
N2 C6 C2 118.25(19) . 1_655 ?
N3 C7 C8 123.0(2) . . ?
N3 C7 H7 118.5 . . ?
C8 C7 H7 118.5 . . ?
C7 C8 C9 118.2(2) . . ?
C7 C8 C12 121.0(3) . . ?
C9 C8 C12 120.8(3) . . ?
C10 C9 C8 119.3(3) . . ?
C10 C9 H9 120.4 . . ?
C8 C9 H9 120.4 . . ?
C11 C10 C9 118.6(3) . . ?
C11 C10 H10 120.7 . . ?
C9 C10 H10 120.7 . . ?
N3 C11 C10 123.1(3) . . ?
N3 C11 H11 118.4 . . ?
C10 C11 H11 118.4 . . ?
O2 C12 N4 123.5(3) . . ?
O2 C12 C8 120.3(3) . . ?
N4 C12 C8 116.2(2) . . ?
 
loop_
 _geom_torsion_atom_site_label_1
 _geom_torsion_atom_site_label_2
 _geom_torsion_atom_site_label_3
 _geom_torsion_atom_site_label_4
 _geom_torsion
 _geom_torsion_site_symmetry_1
 _geom_torsion_site_symmetry_2
 _geom_torsion_site_symmetry_3
 _geom_torsion_site_symmetry_4
 _geom_torsion_publ_flag
N3 Cd1 O1 C6 102.6(4) 3_655 . . . ?
N3 Cd1 O1 C6 -77.4(4) . . . . ?
N1 Cd1 O1 C6 21.2(4) . . . . ?
N1 Cd1 O1 C6 -158.8(4) 3_655 . . . ?
O1 Cd1 N1 C1 -151.57(17) . . . . ?
O1 Cd1 N1 C1 28.43(17) 3_655 . . . ?
N3 Cd1 N1 C1 118.73(18) 3_655 . . . ?
N3 Cd1 N1 C1 -61.27(18) . . . . ?
O1 Cd1 N1 C5 34.35(18) . . . . ?
O1 Cd1 N1 C5 -145.65(18) 3_655 . . . ?
N3 Cd1 N1 C5 -55.35(17) 3_655 . . . ?
N3 Cd1 N1 C5 124.65(17) . . . . ?
O1 Cd1 N3 C7 161.00(18) . . . . ?
O1 Cd1 N3 C7 -19.00(18) 3_655 . . . ?
N1 Cd1 N3 C7 65.72(18) . . . . ?
N1 Cd1 N3 C7 -114.28(18) 3_655 . . . ?
O1 Cd1 N3 C11 -23.8(2) . . . . ?
O1 Cd1 N3 C11 156.2(2) 3_655 . . . ?
N1 Cd1 N3 C11 -119.06(19) . . . . ?
N1 Cd1 N3 C11 60.94(19) 3_655 . . . ?
C5 N1 C1 C2 -2.4(3) . . . . ?
Cd1 N1 C1 C2 -176.52(15) . . . . ?
N1 C1 C2 C3 1.1(3) . . . . ?
N1 C1 C2 C6 179.56(19) . . . 1_455 ?
C1 C2 C3 C4 1.4(3) . . . . ?
C6 C2 C3 C4 -177.0(2) 1_455 . . . ?
C2 C3 C4 C5 -2.5(4) . . . . ?
C1 N1 C5 C4 1.2(4) . . . . ?
Cd1 N1 C5 C4 175.6(2) . . . . ?
C3 C4 C5 N1 1.3(4) . . . . ?
Cd1 O1 C6 N2 16.2(5) . . . . ?
Cd1 O1 C6 C2 -164.5(3) . . . 1_655 ?
C11 N3 C7 C8 2.0(4) . . . . ?
Cd1 N3 C7 C8 177.39(18) . . . . ?
N3 C7 C8 C9 -0.6(4) . . . . ?
N3 C7 C8 C12 -179.5(2) . . . . ?
C7 C8 C9 C10 -2.2(4) . . . . ?
C12 C8 C9 C10 176.7(3) . . . . ?
C8 C9 C10 C11 3.3(5) . . . . ?
C7 N3 C11 C10 -0.8(4) . . . . ?
Cd1 N3 C11 C10 -176.2(2) . . . . ?
C9 C10 C11 N3 -1.9(5) . . . . ?
C7 C8 C12 O2 -142.0(4) . . . . ?
C9 C8 C12 O2 39.1(5) . . . . ?
C7 C8 C12 N4 38.3(4) . . . . ?
C9 C8 C12 N4 -140.6(3) . . . . ?

_diffrn_measured_fraction_theta_max    0.998
_diffrn_reflns_theta_full              30.00
_diffrn_measured_fraction_theta_full   0.998
_refine_diff_density_max    0.813
_refine_diff_density_min   -0.591
_refine_diff_density_rms    0.069
