# Supplementary material for: The Anion Impact on Dimensionality of Cadmium(II) Complexes with Nicotinamide
Source: MDPI journal article supplement (doi:10.3390/chemistry5020092), 2023-06-01
Supplement: s1 [file s1 › 3.cif]

 
data_3
 
_audit_creation_method            'SHELXL-2018/3'
_shelx_SHELXL_version_number      '2018/3'
_chemical_name_systematic         ?
_chemical_name_common             ?
_chemical_melting_point           ?
_chemical_formula_moiety          ?
_chemical_formula_sum
 'C24 H30 Cd Cl2 N8 O15' 
_chemical_formula_weight          853.86

loop_
 _atom_type_symbol
 _atom_type_description
 _atom_type_scat_dispersion_real
 _atom_type_scat_dispersion_imag
 _atom_type_scat_source
 'C'  'C'   0.0033   0.0016
 'International Tables Vol C Tables 4.2.6.8 and 6.1.1.4'
 'H'  'H'   0.0000   0.0000
 'International Tables Vol C Tables 4.2.6.8 and 6.1.1.4'
 'Cd'  'Cd'  -0.8075   1.2024
 'International Tables Vol C Tables 4.2.6.8 and 6.1.1.4'
 'N'  'N'   0.0061   0.0033
 'International Tables Vol C Tables 4.2.6.8 and 6.1.1.4'
 'O'  'O'   0.0106   0.0060
 'International Tables Vol C Tables 4.2.6.8 and 6.1.1.4'
 'Cl'  'Cl'   0.1484   0.1585
 'International Tables Vol C Tables 4.2.6.8 and 6.1.1.4'
 
_space_group_crystal_system       monoclinic
_space_group_IT_number            14
_space_group_name_H-M_alt         'P 21/n'
_space_group_name_Hall            '-P 2yn'
 
_shelx_space_group_comment
;
The symmetry employed for this shelxl refinement is uniquely defined
by the following loop, which should always be used as a source of
symmetry information in preference to the above space-group names.
They are only intended as comments.
;
 
loop_
 _space_group_symop_operation_xyz
 'x, y, z'
 '-x+1/2, y+1/2, -z+1/2'
 '-x, -y, -z'
 'x-1/2, -y-1/2, z-1/2'
 
_cell_length_a                    7.4629(2)
_cell_length_b                    24.0425(6)
_cell_length_c                    18.6052(4)
_cell_angle_alpha                 90
_cell_angle_beta                  92.373(2)
_cell_angle_gamma                 90
_cell_volume                      3335.41(14)
_cell_formula_units_Z             4
_cell_measurement_temperature     296(2)
_cell_measurement_reflns_used     9074
_cell_measurement_theta_min       4.2632
_cell_measurement_theta_max       33.0544
 
_exptl_crystal_description        prism
_exptl_crystal_colour             colourless
_exptl_crystal_density_meas       ?
_exptl_crystal_density_method     ?
_exptl_crystal_density_diffrn     1.700          
_exptl_crystal_F_000              1728
_exptl_transmission_factor_min    ?
_exptl_transmission_factor_max    ?
_exptl_crystal_size_max           ?
_exptl_crystal_size_mid           ?
_exptl_crystal_size_min           ?
_exptl_absorpt_coefficient_mu     0.896
_shelx_estimated_absorpt_T_min    ?
_shelx_estimated_absorpt_T_max    ?
_exptl_absorpt_correction_type    multi-scan
_exptl_absorpt_correction_T_min   0.84186
_exptl_absorpt_correction_T_max   1.00000
_exptl_absorpt_process_details    
;
CrysAlisPro, Oxford Diffraction Ltd.,
Version 1.171.33.55 (release 05-01-2010 CrysAlis171 .NET)
(compiled Jan  5 2010,16:28:46)
Empirical absorption correction using spherical harmonics,
 implemented in SCALE3 ABSPACK scaling algorithm.
;
_exptl_absorpt_special_details    ?
_diffrn_ambient_temperature       296(2)
_diffrn_radiation_wavelength      0.71073
_diffrn_radiation_type            MoK\a
_diffrn_source                    ?
_diffrn_measurement_device_type   
'Oxford Diffraction Xcalibur2 diffractometer with Sapphire 3 CCD detector'
_diffrn_measurement_method        ?
_diffrn_detector_area_resol_mean  ?
_diffrn_reflns_number             13003
_diffrn_reflns_av_unetI/netI      0.0289
_diffrn_reflns_av_R_equivalents   0.0174
_diffrn_reflns_limit_h_min        -8
_diffrn_reflns_limit_h_max        8
_diffrn_reflns_limit_k_min        -28
_diffrn_reflns_limit_k_max        18
_diffrn_reflns_limit_l_min        -18
_diffrn_reflns_limit_l_max        22
_diffrn_reflns_theta_min          4.272
_diffrn_reflns_theta_max          24.998
_diffrn_reflns_theta_full         24.998
_diffrn_measured_fraction_theta_max   0.995
_diffrn_measured_fraction_theta_full  0.995
_diffrn_reflns_Laue_measured_fraction_max    0.995
_diffrn_reflns_Laue_measured_fraction_full   0.995
_diffrn_reflns_point_group_measured_fraction_max   0.995
_diffrn_reflns_point_group_measured_fraction_full  0.995
_reflns_number_total              5834
_reflns_number_gt                 4760
_reflns_threshold_expression      'I > 2\s(I)'
_reflns_Friedel_coverage          0.000
_reflns_Friedel_fraction_max      .
_reflns_Friedel_fraction_full     .
 
_reflns_special_details
;
 Reflections were merged by SHELXL according to the crystal
 class for the calculation of statistics and refinement.
 
 _reflns_Friedel_fraction is defined as the number of unique
 Friedel pairs measured divided by the number that would be
 possible theoretically, ignoring centric projections and
 systematic absences.
;
 
_computing_data_collection        ?
_computing_cell_refinement        ?
_computing_data_reduction         ?
_computing_structure_solution     ?
_computing_structure_refinement 'SHELXL-2018/3 (Sheldrick, 2018)'
_computing_molecular_graphics     ?
_computing_publication_material   ?
_refine_special_details           ?
_refine_ls_structure_factor_coef  Fsqd
_refine_ls_matrix_type            full
_refine_ls_weighting_scheme       calc
_refine_ls_weighting_details
'w=1/[\s^2^(Fo^2^)+(0.0622P)^2^+1.2195P] where P=(Fo^2^+2Fc^2^)/3'
_atom_sites_solution_primary      ?
_atom_sites_solution_secondary    ?
_atom_sites_solution_hydrogens    mixed
_refine_ls_hydrogen_treatment     mixed
_refine_ls_extinction_method      none
_refine_ls_extinction_coef        .
_refine_ls_number_reflns          5834
_refine_ls_number_parameters      493
_refine_ls_number_restraints      17
_refine_ls_R_factor_all           0.0450
_refine_ls_R_factor_gt            0.0344
_refine_ls_wR_factor_ref          0.1002
_refine_ls_wR_factor_gt           0.0970
_refine_ls_goodness_of_fit_ref    1.048
_refine_ls_restrained_S_all       1.046
_refine_ls_shift/su_max           0.002
_refine_ls_shift/su_mean          0.000
 
loop_
 _atom_site_label
 _atom_site_type_symbol
 _atom_site_fract_x
 _atom_site_fract_y
 _atom_site_fract_z
 _atom_site_U_iso_or_equiv
 _atom_site_adp_type
 _atom_site_occupancy
 _atom_site_site_symmetry_order  
 _atom_site_calc_flag
 _atom_site_refinement_flags_posn
 _atom_site_refinement_flags_adp
 _atom_site_refinement_flags_occupancy
 _atom_site_disorder_assembly
 _atom_site_disorder_group
Cd1 Cd 0.33220(3) 0.67266(2) 0.64536(2) 0.03199(10) Uani 1 1 d . . . . .
N1 N 0.4137(4) 0.58884(12) 0.70120(15) 0.0369(7) Uani 1 1 d . . . . .
N2 N 0.3594(5) 0.47069(13) 0.90779(17) 0.0447(8) Uani 1 1 d D . . . .
H12N H 0.324(5) 0.4693(19) 0.9511(10) 0.054 Uiso 1 1 d D U . . .
H22N H 0.399(5) 0.4425(11) 0.885(2) 0.054 Uiso 1 1 d D U . . .
N3 N 0.4218(3) 0.72752(13) 0.74297(15) 0.0358(7) Uani 1 1 d . . . . .
N4 N 0.9011(4) 0.78762(15) 0.9031(2) 0.0517(9) Uani 1 1 d D . . . .
H14N H 0.843(5) 0.8173(11) 0.914(2) 0.062 Uiso 1 1 d D U . . .
H24N H 1.003(3) 0.7817(19) 0.925(2) 0.062 Uiso 1 1 d D U . . .
N5 N 0.2355(3) 0.74807(12) 0.57674(14) 0.0301(6) Uani 1 1 d . . . . .
N6 N -0.2574(4) 0.82200(13) 0.43114(18) 0.0416(8) Uani 1 1 d D . . . .
H16N H -0.206(5) 0.8538(9) 0.427(2) 0.050 Uiso 1 1 d D U . . .
H26N H -0.362(3) 0.8168(17) 0.411(2) 0.050 Uiso 1 1 d D U . . .
N7 N -0.0616(4) 0.56799(15) 0.73957(19) 0.0491(8) Uani 1 1 d . . . . .
N8 N -0.1753(5) 0.45023(15) 0.94140(18) 0.0516(9) Uani 1 1 d D . . . .
H18N H -0.220(5) 0.448(2) 0.9834(11) 0.062 Uiso 1 1 d D U . . .
H28N H -0.160(6) 0.4209(11) 0.916(2) 0.062 Uiso 1 1 d D U . . .
O1 O 0.3184(4) 0.56262(11) 0.91512(14) 0.0497(7) Uani 1 1 d . . . . .
O2 O 0.9001(4) 0.70178(12) 0.85573(16) 0.0551(7) Uani 1 1 d . . . . .
O3 O -0.2708(3) 0.73947(11) 0.48606(14) 0.0428(6) Uani 1 1 d . . . . .
O4 O -0.2112(4) 0.54281(11) 0.94750(15) 0.0584(8) Uani 1 1 d . . . . .
O5 O 0.6193(4) 0.67717(12) 0.60195(16) 0.0494(7) Uani 1 1 d D . . . .
H15O H 0.655(5) 0.7012(12) 0.5742(19) 0.059 Uiso 1 1 d D U . . .
H25O H 0.673(5) 0.6497(10) 0.588(2) 0.059 Uiso 1 1 d D U . . .
O6 O 0.2341(6) 0.61889(15) 0.5428(3) 0.0974(14) Uani 1 1 d D . . . .
H16O H 0.243(8) 0.5858(7) 0.534(3) 0.117 Uiso 1 1 d D U . . .
H26O H 0.159(7) 0.626(3) 0.572(3) 0.117 Uiso 1 1 d D U . . .
O7 O 0.0453(4) 0.66577(11) 0.68532(19) 0.0539(8) Uani 1 1 d D . . . .
H17O H -0.007(5) 0.6940(10) 0.696(2) 0.065 Uiso 1 1 d D U . . .
H27O H 0.004(5) 0.6392(11) 0.706(2) 0.065 Uiso 1 1 d D U . . .
O8 O -0.1074(4) 0.77585(11) 0.69672(18) 0.0574(8) Uani 1 1 d . . . . .
O9 O 0.0178(4) 0.85862(13) 0.65791(18) 0.0673(9) Uani 1 1 d . . . . .
O10 O -0.2845(5) 0.84060(14) 0.6359(2) 0.0873(12) Uani 1 1 d . . . . .
O11 O -0.1759(5) 0.86091(13) 0.75177(17) 0.0695(9) Uani 1 1 d . . . . .
O12 O 0.7415(10) 0.5110(2) 0.4844(4) 0.178(3) Uani 1 1 d . . . . .
O13 O 0.8349(5) 0.58806(18) 0.54612(19) 0.0932(13) Uani 1 1 d . . . . .
O14 O 0.6016(7) 0.5933(3) 0.4638(3) 0.156(2) Uani 1 1 d . . . . .
O15 O 0.8814(9) 0.5768(3) 0.4282(3) 0.173(3) Uani 1 1 d . . . . .
Cl1 Cl -0.13837(11) 0.83385(3) 0.68616(5) 0.0349(2) Uani 1 1 d . . . . .
Cl2 Cl 0.76823(16) 0.56676(5) 0.47981(6) 0.0581(3) Uani 1 1 d . . . . .
C1 C 0.3817(4) 0.57902(14) 0.77028(18) 0.0326(7) Uani 1 1 d . . . . .
H1 H 0.339855 0.608200 0.797769 0.039 Uiso 1 1 calc R U . . .
C2 C 0.4075(4) 0.52790(13) 0.80299(18) 0.0302(7) Uani 1 1 d . . . . .
C3 C 0.4739(5) 0.48493(16) 0.7618(2) 0.0403(8) Uani 1 1 d . . . . .
H3 H 0.493598 0.449903 0.781825 0.048 Uiso 1 1 calc R U . . .
C4 C 0.5101(5) 0.49488(17) 0.6911(2) 0.0456(9) Uani 1 1 d . . . . .
H4 H 0.555672 0.466773 0.662787 0.055 Uiso 1 1 calc R U . . .
C5 C 0.4782(5) 0.54680(17) 0.6629(2) 0.0422(9) Uani 1 1 d . . . . .
H5 H 0.502437 0.553065 0.614968 0.051 Uiso 1 1 calc R U . . .
C6 C 0.3605(4) 0.52114(14) 0.87992(18) 0.0340(8) Uani 1 1 d . . . . .
C7 C 0.5821(4) 0.72194(15) 0.77730(17) 0.0330(7) Uani 1 1 d . . . . .
H7 H 0.656100 0.692906 0.764014 0.040 Uiso 1 1 calc R U . . .
C8 C 0.6426(4) 0.75740(15) 0.83169(17) 0.0314(7) Uani 1 1 d . . . . .
C9 C 0.5312(5) 0.80001(16) 0.8521(2) 0.0404(8) Uani 1 1 d . . . . .
H9 H 0.567405 0.824562 0.888526 0.048 Uiso 1 1 calc R U . . .
C10 C 0.3655(5) 0.80531(18) 0.8174(2) 0.0482(10) Uani 1 1 d . . . . .
H10 H 0.287958 0.833587 0.830142 0.058 Uiso 1 1 calc R U . . .
C11 C 0.3165(5) 0.76904(17) 0.7645(2) 0.0456(9) Uani 1 1 d . . . . .
H11 H 0.203684 0.773088 0.741972 0.055 Uiso 1 1 calc R U . . .
C12 C 0.8268(4) 0.74691(16) 0.86444(18) 0.0360(8) Uani 1 1 d . . . . .
C13 C 0.0710(4) 0.74717(14) 0.54593(17) 0.0294(7) Uani 1 1 d . . . . .
H13 H -0.001051 0.716351 0.553588 0.035 Uiso 1 1 calc R U . . .
C14 C 0.0017(4) 0.79002(13) 0.50292(16) 0.0268(7) Uani 1 1 d . . . . .
C15 C 0.1094(4) 0.83511(14) 0.49071(18) 0.0321(7) Uani 1 1 d . . . . .
H15 H 0.067935 0.864425 0.461958 0.039 Uiso 1 1 calc R U . . .
C16 C 0.2811(5) 0.83602(14) 0.52214(19) 0.0354(8) Uani 1 1 d . . . . .
H16 H 0.356867 0.865942 0.514423 0.042 Uiso 1 1 calc R U . . .
C17 C 0.3380(4) 0.79252(15) 0.56458(18) 0.0337(8) Uani 1 1 d . . . . .
H17 H 0.452813 0.793873 0.585915 0.040 Uiso 1 1 calc R U . . .
C18 C -0.1879(4) 0.78272(14) 0.47259(17) 0.0297(7) Uani 1 1 d . . . . .
C19 C -0.1059(5) 0.55885(16) 0.8076(2) 0.0402(8) Uani 1 1 d . . . . .
H19 H -0.138575 0.589058 0.835425 0.048 Uiso 1 1 calc R U . . .
C20 C -0.1052(4) 0.50643(15) 0.83840(19) 0.0345(8) Uani 1 1 d . . . . .
C21 C -0.0511(5) 0.46203(15) 0.7983(2) 0.0405(9) Uani 1 1 d . . . . .
H21 H -0.045488 0.426517 0.818029 0.049 Uiso 1 1 calc R U . . .
C22 C -0.0050(5) 0.47103(18) 0.7276(2) 0.0485(10) Uani 1 1 d . . . . .
H22 H 0.031210 0.441600 0.699208 0.058 Uiso 1 1 calc R U . . .
C23 C -0.0137(5) 0.52376(18) 0.7006(2) 0.0495(10) Uani 1 1 d . . . . .
H23 H 0.014768 0.529360 0.652931 0.059 Uiso 1 1 calc R U . . .
C24 C -0.1675(5) 0.50138(15) 0.9141(2) 0.0388(8) Uani 1 1 d . . . . .
 
loop_
 _atom_site_aniso_label
 _atom_site_aniso_U_11
 _atom_site_aniso_U_22
 _atom_site_aniso_U_33
 _atom_site_aniso_U_23
 _atom_site_aniso_U_13
 _atom_site_aniso_U_12
Cd1 0.03115(15) 0.03012(15) 0.03411(15) 0.00830(12) -0.00603(10) -0.00139(11)
N1 0.0398(15) 0.0325(16) 0.0386(16) 0.0074(14) 0.0044(13) 0.0069(13)
N2 0.070(2) 0.0270(16) 0.0386(17) 0.0059(15) 0.0132(16) 0.0085(16)
N3 0.0307(14) 0.0393(17) 0.0368(15) -0.0005(14) -0.0059(12) 0.0038(13)
N4 0.0427(18) 0.047(2) 0.064(2) -0.0116(19) -0.0227(16) 0.0068(16)
N5 0.0286(13) 0.0298(15) 0.0315(14) 0.0056(13) -0.0042(11) -0.0015(12)
N6 0.0406(17) 0.0319(17) 0.0505(18) 0.0145(16) -0.0188(14) -0.0062(14)
N7 0.0495(18) 0.046(2) 0.052(2) 0.0099(18) 0.0047(15) -0.0094(16)
N8 0.079(2) 0.0379(19) 0.0387(18) -0.0016(17) 0.0156(17) 0.0017(18)
O1 0.084(2) 0.0267(14) 0.0394(14) -0.0006(12) 0.0135(13) 0.0029(13)
O2 0.0483(15) 0.0505(17) 0.0643(18) -0.0148(16) -0.0247(13) 0.0132(14)
O3 0.0372(13) 0.0390(15) 0.0509(15) 0.0163(13) -0.0135(11) -0.0107(12)
O4 0.093(2) 0.0344(16) 0.0492(16) -0.0077(14) 0.0235(15) -0.0031(15)
O5 0.0454(15) 0.0469(17) 0.0572(17) 0.0138(15) 0.0173(13) 0.0030(13)
O6 0.123(4) 0.047(2) 0.116(4) -0.015(2) -0.065(3) 0.005(2)
O7 0.0434(16) 0.0308(15) 0.089(2) 0.0143(16) 0.0161(15) 0.0026(12)
O8 0.0534(16) 0.0302(14) 0.089(2) 0.0130(15) 0.0112(15) 0.0058(13)
O9 0.077(2) 0.0472(18) 0.081(2) -0.0089(17) 0.0399(17) -0.0221(16)
O10 0.083(2) 0.052(2) 0.122(3) 0.001(2) -0.058(2) 0.0027(17)
O11 0.101(2) 0.0533(19) 0.0568(18) -0.0063(17) 0.0313(17) -0.0055(18)
O12 0.222(7) 0.063(3) 0.242(8) 0.003(4) -0.064(6) -0.027(4)
O13 0.106(3) 0.106(3) 0.066(2) -0.026(2) -0.016(2) 0.027(2)
O14 0.131(4) 0.160(5) 0.170(5) -0.057(4) -0.076(4) 0.057(4)
O15 0.201(6) 0.230(8) 0.093(3) 0.003(4) 0.078(4) -0.014(5)
Cl1 0.0363(4) 0.0256(4) 0.0429(5) 0.0034(4) 0.0038(4) -0.0003(3)
Cl2 0.0723(7) 0.0562(7) 0.0459(6) -0.0091(5) 0.0036(5) -0.0021(6)
C1 0.0323(17) 0.0269(17) 0.0386(18) 0.0036(16) 0.0027(14) 0.0023(14)
C2 0.0316(16) 0.0238(16) 0.0349(17) 0.0017(15) -0.0016(13) 0.0030(14)
C3 0.049(2) 0.0276(18) 0.044(2) 0.0045(17) -0.0002(16) 0.0085(16)
C4 0.056(2) 0.037(2) 0.044(2) -0.0025(18) 0.0095(18) 0.0131(18)
C5 0.045(2) 0.046(2) 0.0357(19) 0.0048(18) 0.0060(16) 0.0082(18)
C6 0.0399(18) 0.0250(17) 0.0369(18) 0.0031(16) -0.0015(14) 0.0031(15)
C7 0.0302(16) 0.0364(19) 0.0320(17) 0.0016(16) -0.0008(13) 0.0012(15)
C8 0.0306(16) 0.0355(19) 0.0281(16) 0.0050(15) -0.0002(13) -0.0006(15)
C9 0.0402(19) 0.042(2) 0.0388(19) -0.0030(18) 0.0018(15) 0.0004(17)
C10 0.041(2) 0.047(2) 0.056(2) -0.007(2) 0.0004(18) 0.0133(18)
C11 0.0336(18) 0.049(2) 0.054(2) -0.003(2) -0.0087(16) 0.0069(18)
C12 0.0365(18) 0.041(2) 0.0304(17) 0.0019(17) -0.0047(14) -0.0010(16)
C13 0.0308(16) 0.0270(17) 0.0300(16) 0.0071(15) -0.0019(13) -0.0039(14)
C14 0.0292(15) 0.0257(16) 0.0252(15) 0.0016(14) -0.0010(12) 0.0010(13)
C15 0.0369(18) 0.0265(17) 0.0328(17) 0.0057(15) -0.0015(14) 0.0010(14)
C16 0.0343(17) 0.0286(18) 0.0433(19) 0.0053(16) 0.0025(15) -0.0083(15)
C17 0.0280(16) 0.0329(19) 0.0398(18) 0.0022(16) -0.0038(14) -0.0040(15)
C18 0.0343(17) 0.0260(17) 0.0281(16) 0.0037(15) -0.0060(13) -0.0011(14)
C19 0.0422(19) 0.033(2) 0.045(2) -0.0005(18) 0.0041(16) -0.0049(17)
C20 0.0299(17) 0.0335(19) 0.0401(19) -0.0035(17) 0.0007(14) -0.0043(15)
C21 0.046(2) 0.0289(19) 0.047(2) -0.0017(18) 0.0054(17) -0.0057(16)
C22 0.054(2) 0.047(2) 0.046(2) -0.010(2) 0.0139(18) -0.0073(19)
C23 0.056(2) 0.052(3) 0.042(2) 0.001(2) 0.0108(18) -0.009(2)
C24 0.044(2) 0.033(2) 0.040(2) -0.0012(18) -0.0004(16) -0.0062(16)
 
_geom_special_details
;
 All esds (except the esd in the dihedral angle between two l.s. planes)
 are estimated using the full covariance matrix.  The cell esds are taken
 into account individually in the estimation of esds in distances, angles
 and torsion angles; correlations between esds in cell parameters are only
 used when they are defined by crystal symmetry.  An approximate (isotropic)
 treatment of cell esds is used for estimating esds involving l.s. planes.
;
 
loop_
 _geom_bond_atom_site_label_1
 _geom_bond_atom_site_label_2
 _geom_bond_distance
 _geom_bond_site_symmetry_2
 _geom_bond_publ_flag
Cd1 O7 2.301(3) . ?
Cd1 N5 2.316(3) . ?
Cd1 N3 2.321(3) . ?
Cd1 O5 2.323(3) . ?
Cd1 N1 2.336(3) . ?
Cd1 O6 2.395(4) . ?
Cd1 H26O 2.16(7) . ?
N1 C5 1.337(5) . ?
N1 C1 1.338(4) . ?
N2 C6 1.319(5) . ?
N2 H12N 0.860(10) . ?
N2 H22N 0.857(10) . ?
N3 C7 1.339(4) . ?
N3 C11 1.342(5) . ?
N4 C12 1.323(5) . ?
N4 H14N 0.859(10) . ?
N4 H24N 0.859(10) . ?
N5 C13 1.333(4) . ?
N5 C17 1.339(4) . ?
N6 C18 1.312(4) . ?
N6 H16N 0.861(10) . ?
N6 H26N 0.861(10) . ?
N7 C19 1.340(5) . ?
N7 C23 1.344(5) . ?
N8 C24 1.333(5) . ?
N8 H18N 0.864(10) . ?
N8 H28N 0.861(10) . ?
O1 C6 1.241(4) . ?
O2 C12 1.229(4) . ?
O3 C18 1.241(4) . ?
O4 C24 1.225(4) . ?
O5 H15O 0.827(10) . ?
O5 H25O 0.820(10) . ?
O6 H16O 0.815(10) . ?
O6 H26O 0.815(10) . ?
O7 H17O 0.812(10) . ?
O7 H27O 0.817(10) . ?
O8 Cl1 1.426(3) . ?
O9 Cl1 1.428(3) . ?
O10 Cl1 1.417(3) . ?
O11 Cl1 1.421(3) . ?
O12 Cl2 1.358(5) . ?
O13 Cl2 1.408(4) . ?
O14 Cl2 1.419(5) . ?
O15 Cl2 1.326(5) . ?
C1 C2 1.381(4) . ?
C1 H1 0.9300 . ?
C2 C3 1.390(5) . ?
C2 C6 1.496(5) . ?
C3 C4 1.375(5) . ?
C3 H3 0.9300 . ?
C4 C5 1.371(5) . ?
C4 H4 0.9300 . ?
C5 H5 0.9300 . ?
C7 C8 1.385(5) . ?
C7 H7 0.9300 . ?
C8 C9 1.382(5) . ?
C8 C12 1.502(4) . ?
C9 C10 1.377(5) . ?
C9 H9 0.9300 . ?
C10 C11 1.353(6) . ?
C10 H10 0.9300 . ?
C11 H11 0.9300 . ?
C13 C14 1.391(4) . ?
C13 H13 0.9300 . ?
C14 C15 1.374(5) . ?
C14 C18 1.512(4) . ?
C15 C16 1.386(5) . ?
C15 H15 0.9300 . ?
C16 C17 1.367(5) . ?
C16 H16 0.9300 . ?
C17 H17 0.9300 . ?
C19 C20 1.384(5) . ?
C19 H19 0.9300 . ?
C20 C21 1.373(5) . ?
C20 C24 1.506(5) . ?
C21 C22 1.389(5) . ?
C21 H21 0.9300 . ?
C22 C23 1.364(6) . ?
C22 H22 0.9300 . ?
C23 H23 0.9300 . ?
 
loop_
 _geom_angle_atom_site_label_1
 _geom_angle_atom_site_label_2
 _geom_angle_atom_site_label_3
 _geom_angle
 _geom_angle_site_symmetry_1
 _geom_angle_site_symmetry_3
 _geom_angle_publ_flag
O7 Cd1 N5 87.79(10) . . ?
O7 Cd1 N3 91.72(11) . . ?
N5 Cd1 N3 93.42(10) . . ?
O7 Cd1 O5 177.94(12) . . ?
N5 Cd1 O5 92.45(10) . . ?
N3 Cd1 O5 90.31(10) . . ?
O7 Cd1 N1 91.31(10) . . ?
N5 Cd1 N1 171.92(10) . . ?
N3 Cd1 N1 94.64(10) . . ?
O5 Cd1 N1 88.16(10) . . ?
O7 Cd1 O6 87.76(15) . . ?
N5 Cd1 O6 84.56(12) . . ?
N3 Cd1 O6 177.93(12) . . ?
O5 Cd1 O6 90.23(15) . . ?
N1 Cd1 O6 87.38(12) . . ?
O7 Cd1 H26O 68.0(4) . . ?
N5 Cd1 H26O 83.6(18) . . ?
N3 Cd1 H26O 159.6(4) . . ?
O5 Cd1 H26O 110.0(4) . . ?
N1 Cd1 H26O 88.6(18) . . ?
O6 Cd1 H26O 19.8(4) . . ?
C5 N1 C1 117.4(3) . . ?
C5 N1 Cd1 120.5(2) . . ?
C1 N1 Cd1 121.7(2) . . ?
C6 N2 H12N 114(3) . . ?
C6 N2 H22N 122(3) . . ?
H12N N2 H22N 124(4) . . ?
C7 N3 C11 117.0(3) . . ?
C7 N3 Cd1 122.6(2) . . ?
C11 N3 Cd1 120.2(2) . . ?
C12 N4 H14N 122(3) . . ?
C12 N4 H24N 119(3) . . ?
H14N N4 H24N 118(4) . . ?
C13 N5 C17 117.5(3) . . ?
C13 N5 Cd1 119.0(2) . . ?
C17 N5 Cd1 123.4(2) . . ?
C18 N6 H16N 121(3) . . ?
C18 N6 H26N 118(3) . . ?
H16N N6 H26N 120(4) . . ?
C19 N7 C23 117.5(4) . . ?
C24 N8 H18N 116(3) . . ?
C24 N8 H28N 123(3) . . ?
H18N N8 H28N 120(4) . . ?
Cd1 O5 H15O 125(3) . . ?
Cd1 O5 H25O 123(3) . . ?
H15O O5 H25O 101(3) . . ?
Cd1 O6 H16O 131(5) . . ?
Cd1 O6 H26O 63(5) . . ?
H16O O6 H26O 114(5) . . ?
Cd1 O7 H17O 119(3) . . ?
Cd1 O7 H27O 126(3) . . ?
H17O O7 H27O 110(4) . . ?
O10 Cl1 O11 110.0(2) . . ?
O10 Cl1 O8 108.6(2) . . ?
O11 Cl1 O8 111.5(2) . . ?
O10 Cl1 O9 109.1(2) . . ?
O11 Cl1 O9 108.55(19) . . ?
O8 Cl1 O9 109.16(18) . . ?
O15 Cl2 O12 108.9(5) . . ?
O15 Cl2 O13 110.8(4) . . ?
O12 Cl2 O13 110.6(4) . . ?
O15 Cl2 O14 110.2(4) . . ?
O12 Cl2 O14 109.1(4) . . ?
O13 Cl2 O14 107.1(3) . . ?
N1 C1 C2 123.6(3) . . ?
N1 C1 H1 118.2 . . ?
C2 C1 H1 118.2 . . ?
C1 C2 C3 117.7(3) . . ?
C1 C2 C6 119.0(3) . . ?
C3 C2 C6 123.3(3) . . ?
C4 C3 C2 119.1(3) . . ?
C4 C3 H3 120.4 . . ?
C2 C3 H3 120.4 . . ?
C5 C4 C3 119.1(4) . . ?
C5 C4 H4 120.4 . . ?
C3 C4 H4 120.4 . . ?
N1 C5 C4 123.0(3) . . ?
N1 C5 H5 118.5 . . ?
C4 C5 H5 118.5 . . ?
O1 C6 N2 121.7(3) . . ?
O1 C6 C2 119.5(3) . . ?
N2 C6 C2 118.8(3) . . ?
N3 C7 C8 123.0(3) . . ?
N3 C7 H7 118.5 . . ?
C8 C7 H7 118.5 . . ?
C9 C8 C7 118.4(3) . . ?
C9 C8 C12 124.3(3) . . ?
C7 C8 C12 117.3(3) . . ?
C10 C9 C8 118.5(4) . . ?
C10 C9 H9 120.7 . . ?
C8 C9 H9 120.7 . . ?
C11 C10 C9 119.5(4) . . ?
C11 C10 H10 120.3 . . ?
C9 C10 H10 120.3 . . ?
N3 C11 C10 123.5(3) . . ?
N3 C11 H11 118.2 . . ?
C10 C11 H11 118.2 . . ?
O2 C12 N4 123.1(3) . . ?
O2 C12 C8 120.0(3) . . ?
N4 C12 C8 116.9(3) . . ?
N5 C13 C14 123.3(3) . . ?
N5 C13 H13 118.3 . . ?
C14 C13 H13 118.3 . . ?
C15 C14 C13 118.3(3) . . ?
C15 C14 C18 125.1(3) . . ?
C13 C14 C18 116.6(3) . . ?
C14 C15 C16 118.6(3) . . ?
C14 C15 H15 120.7 . . ?
C16 C15 H15 120.7 . . ?
C17 C16 C15 119.4(3) . . ?
C17 C16 H16 120.3 . . ?
C15 C16 H16 120.3 . . ?
N5 C17 C16 122.8(3) . . ?
N5 C17 H17 118.6 . . ?
C16 C17 H17 118.6 . . ?
O3 C18 N6 122.2(3) . . ?
O3 C18 C14 119.3(3) . . ?
N6 C18 C14 118.5(3) . . ?
N7 C19 C20 122.9(4) . . ?
N7 C19 H19 118.5 . . ?
C20 C19 H19 118.5 . . ?
C21 C20 C19 118.6(3) . . ?
C21 C20 C24 123.7(3) . . ?
C19 C20 C24 117.6(3) . . ?
C20 C21 C22 118.9(4) . . ?
C20 C21 H21 120.5 . . ?
C22 C21 H21 120.5 . . ?
C23 C22 C21 118.9(4) . . ?
C23 C22 H22 120.5 . . ?
C21 C22 H22 120.5 . . ?
N7 C23 C22 123.1(4) . . ?
N7 C23 H23 118.5 . . ?
C22 C23 H23 118.5 . . ?
O4 C24 N8 122.7(3) . . ?
O4 C24 C20 120.5(3) . . ?
N8 C24 C20 116.8(3) . . ?
 
loop_
 _geom_torsion_atom_site_label_1
 _geom_torsion_atom_site_label_2
 _geom_torsion_atom_site_label_3
 _geom_torsion_atom_site_label_4
 _geom_torsion
 _geom_torsion_site_symmetry_1
 _geom_torsion_site_symmetry_2
 _geom_torsion_site_symmetry_3
 _geom_torsion_site_symmetry_4
 _geom_torsion_publ_flag
C5 N1 C1 C2 -1.6(5) . . . . ?
Cd1 N1 C1 C2 171.8(2) . . . . ?
N1 C1 C2 C3 1.4(5) . . . . ?
N1 C1 C2 C6 -177.7(3) . . . . ?
C1 C2 C3 C4 -0.2(5) . . . . ?
C6 C2 C3 C4 178.8(4) . . . . ?
C2 C3 C4 C5 -0.6(6) . . . . ?
C1 N1 C5 C4 0.7(5) . . . . ?
Cd1 N1 C5 C4 -172.8(3) . . . . ?
C3 C4 C5 N1 0.4(6) . . . . ?
C1 C2 C6 O1 -7.9(5) . . . . ?
C3 C2 C6 O1 173.1(3) . . . . ?
C1 C2 C6 N2 169.9(3) . . . . ?
C3 C2 C6 N2 -9.1(5) . . . . ?
C11 N3 C7 C8 -1.5(5) . . . . ?
Cd1 N3 C7 C8 174.5(2) . . . . ?
N3 C7 C8 C9 1.0(5) . . . . ?
N3 C7 C8 C12 -178.8(3) . . . . ?
C7 C8 C9 C10 -0.1(5) . . . . ?
C12 C8 C9 C10 179.6(4) . . . . ?
C8 C9 C10 C11 -0.1(6) . . . . ?
C7 N3 C11 C10 1.3(6) . . . . ?
Cd1 N3 C11 C10 -174.8(3) . . . . ?
C9 C10 C11 N3 -0.5(6) . . . . ?
C9 C8 C12 O2 163.2(4) . . . . ?
C7 C8 C12 O2 -17.1(5) . . . . ?
C9 C8 C12 N4 -15.6(5) . . . . ?
C7 C8 C12 N4 164.2(3) . . . . ?
C17 N5 C13 C14 -0.6(5) . . . . ?
Cd1 N5 C13 C14 -179.0(2) . . . . ?
N5 C13 C14 C15 1.0(5) . . . . ?
N5 C13 C14 C18 -179.5(3) . . . . ?
C13 C14 C15 C16 -0.5(5) . . . . ?
C18 C14 C15 C16 -179.9(3) . . . . ?
C14 C15 C16 C17 -0.5(5) . . . . ?
C13 N5 C17 C16 -0.4(5) . . . . ?
Cd1 N5 C17 C16 177.9(3) . . . . ?
C15 C16 C17 N5 0.9(5) . . . . ?
C15 C14 C18 O3 178.3(3) . . . . ?
C13 C14 C18 O3 -1.1(5) . . . . ?
C15 C14 C18 N6 0.1(5) . . . . ?
C13 C14 C18 N6 -179.3(3) . . . . ?
C23 N7 C19 C20 -0.4(6) . . . . ?
N7 C19 C20 C21 2.2(5) . . . . ?
N7 C19 C20 C24 -176.7(3) . . . . ?
C19 C20 C21 C22 -2.1(5) . . . . ?
C24 C20 C21 C22 176.7(3) . . . . ?
C20 C21 C22 C23 0.4(6) . . . . ?
C19 N7 C23 C22 -1.4(6) . . . . ?
C21 C22 C23 N7 1.4(6) . . . . ?
C21 C20 C24 O4 178.8(4) . . . . ?
C19 C20 C24 O4 -2.4(5) . . . . ?
C21 C20 C24 N8 -2.5(5) . . . . ?
C19 C20 C24 N8 176.4(4) . . . . ?
 
loop_
 _geom_hbond_atom_site_label_D 
 _geom_hbond_atom_site_label_H 
 _geom_hbond_atom_site_label_A 
 _geom_hbond_distance_DH 
 _geom_hbond_distance_HA 
 _geom_hbond_distance_DA 
 _geom_hbond_angle_DHA 
 _geom_hbond_site_symmetry_A 
 _geom_hbond_publ_flag
N2 H12N O4  0.860(10) 2.116(13) 2.970(4) 172(4) 3_567 yes
N2 H22N O9  0.857(10) 2.266(13) 3.112(4) 169(4) 2_546 yes
N4 H24N O3  0.859(10) 2.059(12) 2.913(4) 173(4) 4_776 yes
N6 H16N O1  0.861(10) 2.030(18) 2.849(4) 159(4) 4_575 yes
N6 H26N O2  0.861(10) 2.064(12) 2.921(4) 173(4) 4_475 yes
N8 H18N O1  0.864(10) 2.069(12) 2.932(4) 177(5) 3_567 yes
N8 H28N O10  0.861(10) 2.189(18) 3.011(5) 160(4) 2_446 yes
O5 H15O O3  0.827(10) 1.978(17) 2.777(4) 162(4) 1_655 yes
O5 H25O O13  0.820(10) 2.083(13) 2.898(5) 172(4) . yes
O6 H16O O12  0.815(10) 2.357(13) 3.171(7) 177(6) 3_666 yes
O7 H17O O8  0.812(10) 2.106(16) 2.893(4) 163(4) . yes
O7 H27O N7  0.817(10) 1.891(14) 2.692(4) 167(4) . yes
C11 H11 O8  0.93 2.44 3.361(5) 171.9 . yes
C16 H16 O4  0.93 2.56 3.229(4) 128.9 4_675 yes
C17 H17 O10  0.93 2.41 3.275(5) 154.2 1_655 yes
C22 H22 O15  0.93 2.52 3.286(6) 139.4 3_666 yes
 
_refine_diff_density_max    1.661
_refine_diff_density_min   -0.564
_refine_diff_density_rms    0.076

_shelx_res_file
;
TITL shelxt_a.res in P2(1)/n
    shelx.res
    created by SHELXL-2018/3 at 20:54:42 on 27-Feb-2023
CELL  0.71073   7.4629  24.0425  18.6052   90.000   92.373   90.000
ZERR     4   0.0002   0.0006   0.0004    0.000    0.002    0.000
LATT   1
SYMM  1/2 - X, 1/2 + Y, 1/2 - Z
SFAC  C    H    CD   N    O    CL
UNIT  96 120 4 32 60 8
MERG   2
OMIT    -1.00  50
FMAP   2
PLAN   20
BOND $H
LIST   4
L.S.  10
ACTA
TEMP 23
CONF
EQIV $1 -x, -y+1, -z+2
HTAB N2 O4_$1
EQIV $2 -x+1/2, y-1/2, -z+3/2
HTAB N2 O9_$2
EQIV $3 x+3/2, -y+3/2, z+1/2
HTAB N4 O3_$3
EQIV $4 x-1/2, -y+3/2, z-1/2
HTAB N6 O1_$4
EQIV $5 x-3/2, -y+3/2, z-1/2
HTAB N6 O2_$5
HTAB N8 O1_$1
EQIV $6 -x-1/2, y-1/2, -z+3/2
HTAB N8 O10_$6
EQIV $7 x+1, y, z
HTAB O5 O3_$7
HTAB O5 O13
EQIV $8 -x+1, -y+1, -z+1
HTAB O6 O12_$8
HTAB O7 O8
HTAB O7 N7
HTAB C11 O8
EQIV $9 x+1/2, -y+3/2, z-1/2
HTAB C16 O4_$9
HTAB C17 O10_$7
HTAB C22 O15_$8
DFIX 0.86 0.01 N2 H12N
DFIX 0.86 0.01 N2 H22N
DFIX 0.86 0.01 N4 H14N
DFIX 0.86 0.01 N4 H24N
DFIX 0.86 0.01 N6 H16N
DFIX 0.86 0.01 N6 H26N
DFIX 0.86 0.01 N8 H18N
DFIX 0.86 0.01 N8 H28N
DFIX 0.82 0.01 O5 H15O
DFIX 0.82 0.01 O5 H25O
DANG 1.32 H15O H25O
DFIX 0.82 0.01 O6 H16O
DFIX 0.82 0.01 O6 H26O
DANG 1.32 H16O H26O
DFIX 0.82 0.01 O7 H17O
DFIX 0.82 0.01 O7 H27O
DANG 1.32 H17O H27O

WGHT    0.062200    1.219500
FVAR       3.16266
CD1   3    0.332202    0.672656    0.645355    11.00000    0.03115    0.03012 =
         0.03411    0.00830   -0.00603   -0.00139
N1    4    0.413743    0.588840    0.701200    11.00000    0.03975    0.03246 =
         0.03863    0.00745    0.00443    0.00690
N2    4    0.359385    0.470690    0.907791    11.00000    0.06957    0.02697 =
         0.03860    0.00589    0.01317    0.00852
H12N  2    0.323639    0.469278    0.951097    11.00000   -1.20000
H22N  2    0.399049    0.442470    0.885201    11.00000   -1.20000
N3    4    0.421843    0.727522    0.742965    11.00000    0.03067    0.03926 =
         0.03677   -0.00050   -0.00589    0.00377
N4    4    0.901097    0.787621    0.903126    11.00000    0.04269    0.04674 =
         0.06367   -0.01156   -0.02270    0.00682
H14N  2    0.843297    0.817266    0.913512    11.00000   -1.20000
H24N  2    1.002606    0.781714    0.925255    11.00000   -1.20000
N5    4    0.235459    0.748065    0.576742    11.00000    0.02857    0.02984 =
         0.03147    0.00560   -0.00418   -0.00151
N6    4   -0.257369    0.822004    0.431143    11.00000    0.04063    0.03187 =
         0.05046    0.01449   -0.01885   -0.00621
H16N  2   -0.205829    0.853846    0.427344    11.00000   -1.20000
H26N  2   -0.362310    0.816759    0.411303    11.00000   -1.20000
N7    4   -0.061555    0.567990    0.739566    11.00000    0.04948    0.04581 =
         0.05217    0.00988    0.00470   -0.00943
N8    4   -0.175344    0.450232    0.941400    11.00000    0.07909    0.03793 =
         0.03872   -0.00159    0.01555    0.00169
H18N  2   -0.219711    0.447532    0.983437    11.00000   -1.20000
H28N  2   -0.159881    0.420857    0.915906    11.00000   -1.20000
O1    5    0.318393    0.562618    0.915121    11.00000    0.08392    0.02669 =
         0.03939   -0.00063    0.01349    0.00289
O2    5    0.900058    0.701779    0.855734    11.00000    0.04828    0.05047 =
         0.06426   -0.01476   -0.02474    0.01320
O3    5   -0.270811    0.739474    0.486056    11.00000    0.03715    0.03903 =
         0.05089    0.01628   -0.01352   -0.01067
O4    5   -0.211204    0.542810    0.947502    11.00000    0.09335    0.03442 =
         0.04923   -0.00767    0.02345   -0.00307
O5    5    0.619259    0.677166    0.601949    11.00000    0.04540    0.04685 =
         0.05720    0.01382    0.01732    0.00303
H15O  2    0.655389    0.701173    0.574171    11.00000   -1.20000
H25O  2    0.673152    0.649725    0.588015    11.00000   -1.20000
O6    5    0.234114    0.618888    0.542767    11.00000    0.12345    0.04747 =
         0.11561   -0.01477   -0.06508    0.00486
H16O  2    0.243130    0.585773    0.534275    11.00000   -1.20000
H26O  2    0.158526    0.626367    0.571676    11.00000   -1.20000
O7    5    0.045346    0.665772    0.685318    11.00000    0.04339    0.03083 =
         0.08865    0.01430    0.01608    0.00255
H17O  2   -0.007386    0.693961    0.695960    11.00000   -1.20000
H27O  2    0.003887    0.639197    0.706354    11.00000   -1.20000
O8    5   -0.107369    0.775852    0.696715    11.00000    0.05339    0.03019 =
         0.08945    0.01301    0.01120    0.00579
O9    5    0.017775    0.858619    0.657907    11.00000    0.07656    0.04720 =
         0.08124   -0.00891    0.03989   -0.02212
O10   5   -0.284483    0.840601    0.635859    11.00000    0.08300    0.05232 =
         0.12157    0.00075   -0.05774    0.00271
O11   5   -0.175894    0.860912    0.751774    11.00000    0.10071    0.05334 =
         0.05677   -0.00627    0.03134   -0.00548
O12   5    0.741508    0.511035    0.484409    11.00000    0.22200    0.06323 =
         0.24248    0.00276   -0.06433   -0.02672
O13   5    0.834929    0.588063    0.546121    11.00000    0.10623    0.10593 =
         0.06596   -0.02619   -0.01550    0.02734
O14   5    0.601597    0.593341    0.463845    11.00000    0.13107    0.15985 =
         0.17040   -0.05732   -0.07637    0.05747
O15   5    0.881428    0.576756    0.428240    11.00000    0.20061    0.23027 =
         0.09283    0.00323    0.07785   -0.01383
CL1   6   -0.138369    0.833851    0.686164    11.00000    0.03632    0.02565 =
         0.04289    0.00338    0.00376   -0.00028
CL2   6    0.768229    0.566761    0.479805    11.00000    0.07228    0.05620 =
         0.04590   -0.00908    0.00359   -0.00207
C1    1    0.381728    0.579015    0.770275    11.00000    0.03230    0.02693 =
         0.03863    0.00357    0.00269    0.00230
AFIX  43
H1    2    0.339855    0.608200    0.797769    11.00000   -1.20000
AFIX   0
C2    1    0.407457    0.527901    0.802994    11.00000    0.03162    0.02382 =
         0.03492    0.00167   -0.00157    0.00295
C3    1    0.473897    0.484931    0.761815    11.00000    0.04945    0.02763 =
         0.04378    0.00455   -0.00020    0.00847
AFIX  43
H3    2    0.493598    0.449903    0.781825    11.00000   -1.20000
AFIX   0
C4    1    0.510115    0.494883    0.691113    11.00000    0.05594    0.03738 =
         0.04407   -0.00248    0.00951    0.01310
AFIX  43
H4    2    0.555672    0.466773    0.662787    11.00000   -1.20000
AFIX   0
C5    1    0.478177    0.546795    0.662923    11.00000    0.04532    0.04594 =
         0.03565    0.00479    0.00600    0.00817
AFIX  43
H5    2    0.502437    0.553065    0.614968    11.00000   -1.20000
AFIX   0
C6    1    0.360477    0.521137    0.879917    11.00000    0.03991    0.02499 =
         0.03690    0.00309   -0.00148    0.00311
C7    1    0.582069    0.721939    0.777303    11.00000    0.03022    0.03643 =
         0.03205    0.00157   -0.00083    0.00121
AFIX  43
H7    2    0.656100    0.692906    0.764014    11.00000   -1.20000
AFIX   0
C8    1    0.642605    0.757404    0.831688    11.00000    0.03060    0.03547 =
         0.02808    0.00504   -0.00021   -0.00056
C9    1    0.531232    0.800011    0.852121    11.00000    0.04024    0.04198 =
         0.03885   -0.00298    0.00178    0.00035
AFIX  43
H9    2    0.567405    0.824562    0.888526    11.00000   -1.20000
AFIX   0
C10   1    0.365510    0.805310    0.817384    11.00000    0.04099    0.04725 =
         0.05615   -0.00688    0.00036    0.01334
AFIX  43
H10   2    0.287958    0.833587    0.830142    11.00000   -1.20000
AFIX   0
C11   1    0.316455    0.769038    0.764547    11.00000    0.03364    0.04864 =
         0.05364   -0.00345   -0.00872    0.00686
AFIX  43
H11   2    0.203684    0.773088    0.741972    11.00000   -1.20000
AFIX   0
C12   1    0.826814    0.746912    0.864440    11.00000    0.03655    0.04074 =
         0.03035    0.00186   -0.00468   -0.00096
C13   1    0.070997    0.747174    0.545935    11.00000    0.03085    0.02696 =
         0.02998    0.00712   -0.00192   -0.00386
AFIX  43
H13   2   -0.001051    0.716351    0.553588    11.00000   -1.20000
AFIX   0
C14   1    0.001732    0.790024    0.502920    11.00000    0.02924    0.02573 =
         0.02524    0.00162   -0.00096    0.00105
C15   1    0.109381    0.835111    0.490712    11.00000    0.03688    0.02652 =
         0.03279    0.00574   -0.00147    0.00104
AFIX  43
H15   2    0.067935    0.864425    0.461958    11.00000   -1.20000
AFIX   0
C16   1    0.281074    0.836017    0.522139    11.00000    0.03430    0.02862 =
         0.04327    0.00529    0.00254   -0.00828
AFIX  43
H16   2    0.356867    0.865942    0.514423    11.00000   -1.20000
AFIX   0
C17   1    0.337979    0.792524    0.564579    11.00000    0.02801    0.03290 =
         0.03976    0.00219   -0.00380   -0.00397
AFIX  43
H17   2    0.452813    0.793873    0.585915    11.00000   -1.20000
AFIX   0
C18   1   -0.187892    0.782720    0.472592    11.00000    0.03431    0.02598 =
         0.02808    0.00366   -0.00598   -0.00111
C19   1   -0.105885    0.558845    0.807636    11.00000    0.04218    0.03332 =
         0.04531   -0.00054    0.00406   -0.00486
AFIX  43
H19   2   -0.138575    0.589058    0.835425    11.00000   -1.20000
AFIX   0
C20   1   -0.105166    0.506435    0.838397    11.00000    0.02988    0.03351 =
         0.04014   -0.00352    0.00071   -0.00431
C21   1   -0.051129    0.462032    0.798257    11.00000    0.04600    0.02888 =
         0.04699   -0.00166    0.00543   -0.00571
AFIX  43
H21   2   -0.045488    0.426517    0.818029    11.00000   -1.20000
AFIX   0
C22   1   -0.005010    0.471034    0.727609    11.00000    0.05402    0.04678 =
         0.04562   -0.01043    0.01388   -0.00729
AFIX  43
H22   2    0.031210    0.441600    0.699208    11.00000   -1.20000
AFIX   0
C23   1   -0.013730    0.523764    0.700581    11.00000    0.05583    0.05153 =
         0.04184    0.00107    0.01076   -0.00939
AFIX  43
H23   2    0.014768    0.529360    0.652931    11.00000   -1.20000
AFIX   0
C24   1   -0.167450    0.501383    0.914100    11.00000    0.04360    0.03300 =
         0.03977   -0.00121   -0.00042   -0.00621

HKLF    4


REM  shelxt_a.res in P2(1)/n
REM wR2 = 0.1002, GooF = S = 1.048, Restrained GooF = 1.046 for all data
REM R1 = 0.0344 for 4760 Fo > 4sig(Fo) and 0.0450 for all 5834 data
REM 493 parameters refined using 17 restraints

END

WGHT      0.0622      1.2195

REM Highest difference peak  1.661,  deepest hole -0.564,  1-sigma level  0.076
Q1    1   0.2892  0.5850  0.4338  11.00000  0.05    1.66
Q2    1   0.7111  0.5984  0.4257  11.00000  0.05    0.56
Q3    1  -0.0860  0.8399  0.7570  11.00000  0.05    0.40
Q4    1  -0.1010  0.8712  0.6328  11.00000  0.05    0.38
Q5    1   0.6140  0.5418  0.4976  11.00000  0.05    0.38
Q6    1  -0.3494  0.8342  0.6849  11.00000  0.05    0.36
Q7    1   0.5590  0.5942  0.4575  11.00000  0.05    0.36
Q8    1   0.9053  0.5303  0.4580  11.00000  0.05    0.33
Q9    1   0.7971  0.5229  0.4398  11.00000  0.05    0.33
Q10   1   0.9307  0.6058  0.4732  11.00000  0.05    0.31
Q11   1   0.0489  0.6749  0.7432  11.00000  0.05    0.30
Q12   1   0.7175  0.5650  0.5427  11.00000  0.05    0.30
Q13   1  -0.0981  0.5085  0.8742  11.00000  0.05    0.29
Q14   1  -0.0863  0.7909  0.4979  11.00000  0.05    0.29
Q15   1   0.1935  0.8329  0.4999  11.00000  0.05    0.29
Q16   1   0.3964  0.5039  0.7797  11.00000  0.05    0.27
Q17   1   0.0171  0.7709  0.5168  11.00000  0.05    0.27
Q18   1   0.7525  0.4955  0.5173  11.00000  0.05    0.26
Q19   1   0.9441  0.7274  0.8345  11.00000  0.05    0.26
Q20   1   0.1988  0.6728  0.6640  11.00000  0.05    0.25
;
_shelx_res_checksum   22629

_shelx_hkl_file
;
   0   0  -4 784.096 147.047   3
   0   0   4 707.642 208.729   3
   0   0   5 15.9423 260.951   3
   0   0  -5 84.5789 199.252   3
   0   0   6 164464. 1051.03   3
   0   0  -6 163408. 1044.97   3
   0   0   7 190.305 312.455   3
   0   0   8 7027.51 392.897   3
   0   0   9-69.6817 299.199   0
   0   0   9 66.2780 338.570   3
   0   0  10 96004.4 978.192   0
   0   0  10 95867.0 1069.39   3
   0   0  11 484.757 376.895   3
   0   0  11 167.231 338.358   0
   0   0  12 15345.6 552.041   0
   0   0  12 16223.6 600.154   3
   0   0  13 70.9869 393.241   0
   0   0  13 363.778 430.697   3
   0   0  14 37840.7 818.273   0
   0   0  14 38301.3 906.298   3
   0   0  15 524.869 494.333   3
   0   0  15 235.705 433.025   0
   0   0  16 599.971 481.538   3
   0   0  16 299.898 466.008   0
   0   0  17 330.237 458.698   0
   0   0  17 530.803 530.767   3
   0   0  18 49780.7 1177.14   3
   0   0  18 48987.1 1031.94   0
   0   0  19 1121.68 508.186   0
   0   0  19 1173.19 596.057   3
   0   0  20 14088.6 719.432   0
   0   0  20 14171.6 807.945   3
   0   0  21 307.608 624.016   3
   0   0  21 122.315 509.900   0
   0   0  22 1903.17 675.230   3
   0   0  22 1599.01 546.010   0
   0   0  23 702.072 535.892   0
   0   0  23 51.1807 605.588   3
   0   0  24 12670.1 920.883   3
   0   0  25 147.032 689.004   3
   0   0  26 1329.19 680.617   3
   0   0  27 291.679 752.513   3
   0  -1   4 138096. 714.317   0
   0   1  -4 136821. 787.456   3
   0  -1   4 137413. 792.616   3
   0   1   4 133621. 763.134   3
   0  -1  -4 137621. 772.314   3
   0  -1   5 67924.9 584.129   0
   0  -1   5 67558.5 654.613   3
   0   1  -5 68090.4 641.597   3
   0   1   5 67700.1 645.092   3
   0  -1  -5 68068.1 617.559   3
   0   1   6 15182.1 189.759   1
   0  -1   6 15140.8 381.220   0
   0  -1  -6 15269.7 383.850   3
   0  -1   6 15552.0 442.708   3
   0   1  -6 15227.6 384.054   3
   0   1   6 15519.1 437.690   3
   0   1   7 98556.3 907.963   3
   0   1   7 98084.4 444.134   1
   0  -1   7 98572.7 914.935   3
   0  -1   7 99460.4 821.378   0
   0  -1   8 48788.9 646.777   0
   0   1   8 46560.9 316.809   1
   0   1   8 48866.5 704.819   3
   0  -1   8 49174.3 715.452   3
   0  -1   9 1499.31 362.287   3
   0  -1   9 1501.37 319.263   0
   0   1   9 1420.55 358.649   3
   0   1  10 10435.2 461.442   3
   0  -1  10 9663.29 446.534   0
   0  -1  10 10068.7 490.797   3
   0  -1  11 36836.0 694.035   0
   0   1  11 36006.0 738.133   3
   0  -1  11 36237.8 748.459   3
   0  -1  12 33365.0 715.825   0
   0  -1  12 35310.2 795.658   3
   0   1  12 32125.6 697.909   0
   0   1  12 34633.9 770.372   3
   0  -1  13 2776.61 441.660   0
   0   1  13 3248.45 472.821   3
   0  -1  13 2869.42 463.478   3
   0   1  13 2229.13 426.294   0
   0   1  14 12791.7 602.224   0
   0  -1  14 13969.0 595.114   0
   0   1  14 14845.1 661.012   3
   0  -1  14 14429.5 676.186   3
   0   1  15 377.570 488.260   3
   0   1  15 271.703 441.459   0
   0  -1  15 183.407 432.742   0
   0  -1  15 313.847 475.854   3
   0   1  16 10039.3 636.479   3
   0  -1  16 9561.71 644.526   3
   0  -1  16 10278.3 605.038   0
   0   1  16 9056.41 586.756   0
   0  -1  17 13726.6 753.027   3
   0   1  17 11998.1 701.284   3
   0   1  17 12358.2 642.123   0
   0  -1  17 12840.7 647.049   0
   0  -1  18 13802.0 758.373   3
   0   1  18 12243.7 735.055   3
   0   1  18 12265.9 677.065   0
   0  -1  18 12849.2 667.063   0
   0  -1  19 786.789 505.908   0
   0  -1  19 354.546 613.642   3
   0   1  19 417.390 488.910   0
   0   1  19 680.492 572.270   3
   0   1  20 7899.08 631.287   0
   0  -1  20 8688.84 640.787   0
   0   1  20 8630.90 757.871   3
   0  -1  20 9786.73 762.025   3
   0  -1  21 791.340 600.259   3
   0   1  21 565.612 497.202   0
   0   1  21 666.890 631.286   3
   0  -1  21 749.288 509.011   0
   0  -1  22 10402.5 846.974   3
   0   1  22 10776.1 796.507   3
   0   1  22 11197.4 720.320   0
   0  -1  22 11092.1 709.851   0
   0   1  23 2787.15 647.490   3
   0  -1  23 2711.65 584.562   0
   0  -1  23 2385.64 652.726   3
   0   1  23 2378.25 577.566   0
   0   1  24 1110.72 693.247   3
   0  -1  24 544.452 712.985   3
   0   1  25 1894.48 729.704   3
   0  -1  25 1582.49 665.655   3
   0  -1  26 3206.23 822.695   3
   0   1  26 2433.73 698.143   3
   0  -1  27 980.849 723.629   3
   0   1  27 1272.15 773.474   3
   0  -2   4 166227. 911.045   3
   0   2  -4 169653. 823.398   0
   0   2   4 168223. 859.781   3
   0   2  -4 166873. 898.570   3
   0  -2  -4 170465. 866.149   3
   0  -2   4 166329. 811.486   0
   0  -2   5 79788.4 637.585   0
   0  -2   5 78642.8 716.047   3
   0  -2  -5 80562.4 683.933   3
   0   2   5 78785.0 691.108   3
   0   2  -5 79616.8 704.441   3
   0   2  -5 79892.1 646.616   0
   0   2   6 117872. 903.207   3
   0   2  -6 117616. 920.592   3
   0  -2   6 118918. 831.867   0
   0  -2  -6 120137. 896.087   3
   0  -2   6 116749. 955.652   3
   0  -2   7 5676.54 329.347   0
   0   2   7 5164.48 358.433   3
   0  -2   7 5686.13 416.708   3
   0  -2   8 84702.3 917.127   3
   0   2   8 83292.1 498.908   1
   0  -2   8 85273.0 823.944   0
   0   2   8 85556.4 899.206   3
   0   2   9 40533.6 358.961   1
   0  -2   9 41252.0 720.756   3
   0   2   9 40163.3 707.435   3
   0  -2   9 39781.0 640.915   0
   0   2  10 60354.5 426.101   1
   0  -2  10 62887.7 906.047   3
   0   2  10 63029.7 880.734   3
   0  -2  10 61138.9 806.757   0
   0   2  11 23885.1 637.785   3
   0   2  11 22688.1 266.416   1
   0  -2  11 24491.5 599.541   0
   0  -2  11 22976.7 643.584   3
   0   2  12 8586.98 522.343   3
   0  -2  12 8651.03 524.193   3
   0  -2  12 10281.2 510.808   0
   0  -2  13 66887.3 1085.56   3
   0   2  13 64775.9 1045.53   3
   0  -2  14 21925.1 687.830   0
   0  -2  14 22579.2 764.588   3
   0   2  14 21066.7 693.706   0
   0   2  14 22482.7 734.542   3
   0   2  15 26110.6 762.969   0
   0  -2  15 24639.9 722.001   0
   0  -2  15 24785.0 807.405   3
   0   2  15 24789.1 790.205   3
   0   2  16 285.501 499.355   3
   0  -2  16 479.742 462.396   0
   0  -2  16 543.160 548.665   3
   0   2  16 355.268 480.827   0
   0   2  17 2907.91 523.846   0
   0  -2  17 3062.16 571.992   3
   0  -2  17 3767.80 519.832   0
   0   2  17 3705.84 590.219   3
   0   2  18 3699.46 566.343   0
   0   2  18 3781.80 616.427   3
   0  -2  18 3975.82 543.265   0
   0  -2  18 3865.59 645.631   3
   0  -2  19 20394.8 877.465   3
   0  -2  19 19744.7 770.837   0
   0   2  19 18996.0 768.616   0
   0   2  19 20821.0 877.838   3
   0   2  20 2000.73 519.486   0
   0   2  20 2000.03 600.803   3
   0  -2  20 2372.73 530.259   0
   0  -2  20 2104.70 674.044   3
   0   2  21 1141.69 580.648   3
   0  -2  21 1203.62 516.931   0
   0  -2  21 959.832 589.889   3
   0   2  21 968.745 520.790   0
   0   2  22 1918.61 556.597   0
   0  -2  22 2974.28 730.544   3
   0   2  22 3078.48 650.815   3
   0  -2  22 2570.87 570.747   0
   0   2  23 2321.70 557.977   0
   0  -2  23 2489.58 659.944   3
   0   2  23 2381.89 677.223   3
   0  -2  24 3329.51 771.935   3
   0   2  24 3591.29 756.299   3
   0   2  25 696.945 696.312   3
   0  -2  25 1022.52 650.067   3
   0   2  26 162.741 613.576   3
   0  -2  26 337.008 760.318   3
   0  -2  27 167.095 668.100   3
   0   2  27 172.212 696.747   3
   0  -3  -4 126371. 781.110   3
   0   3  -4 125496. 825.798   3
   0   3  -4 125092. 749.490   0
   0  -3   4 124617. 834.650   3
   0   3   4 124453. 783.650   3
   0  -3  -5 328798. 1366.54   3
   0   3  -5 328583. 1432.22   3
   0  -3   5 324068. 5623.87   3
   0   3  -5 326469. 1301.52   0
   0   3   5 325637. 5289.65   3
   0   3   6 25858.3 520.882   3
   0  -3  -6 25259.1 451.386   3
   0  -3   6 25909.4 468.935   0
   0  -3   6 26151.5 534.336   3
   0   3  -6 26557.0 483.977   0
   0  -3   7 19015.0 448.783   0
   0   3   7 18890.4 488.026   3
   0   3  -7 19604.2 441.549   0
   0  -3   7 19283.6 533.046   3
   0   3   8 6283.59 389.599   3
   0  -3   8 6472.75 451.176   3
   0  -3   8 6137.90 355.306   0
   0  -3   9 16144.2 525.351   3
   0   3  -9 16423.5 189.836   1
   0   3   9 17664.2 509.410   3
   0  -3   9 17180.7 483.471   0
   0   3  10 3898.97 182.114   1
   0  -3  10 4276.21 395.927   0
   0  -3  10 4160.56 444.703   3
   0   3  10 3614.64 405.123   3
   0   3  11 74301.5 1004.14   3
   0   3  11 73056.0 541.688   1
   0  -3  11 72135.7 922.025   0
   0  -3  11 74650.0 1043.92   3
   0  -3  12 900.930 447.149   3
   0   3  12 547.895 129.048   1
   0  -3  12 914.570 397.000   0
   0   3  12 823.765 410.940   3
   0  -3  13 30490.0 820.209   3
   0   3  13 29602.8 766.179   3
   0  -3  13 30272.4 725.248   0
   0  -3  14 238.365 523.943   3
   0  -3  14 347.835 441.072   0
   0   3  14 244.712 465.564   3
   0  -3  15 717.194 518.101   3
   0  -3  15 901.616 443.948   0
   0   3  15 544.394 474.973   3
   0  -3  16 3462.42 557.687   3
   0   3  16 3048.28 504.245   0
   0  -3  16 3853.06 516.715   0
   0   3  16 3641.28 547.258   3
   0   3  17 38625.8 1019.49   3
   0  -3  17 37665.0 905.364   0
   0  -3  17 40064.0 1060.49   3
   0   3  17 37208.5 917.805   0
   0   3  18 1176.52 517.180   0
   0   3  18 1714.22 599.948   3
   0  -3  18 2581.31 627.246   3
   0  -3  18 2309.28 531.737   0
   0   3  19 3301.30 557.806   0
   0  -3  19 3672.47 541.036   0
   0  -3  19 3577.94 608.805   3
   0   3  19 3666.38 631.228   3
   0  -3  20 366.913 642.460   3
   0   3  20 223.638 510.982   0
   0   3  20-18.2062 579.482   3
   0   3  21 17481.9 885.429   3
   0  -3  21 17369.2 886.170   3
   0   3  21 16950.8 795.981   0
   0  -3  22 625.444 670.391   3
   0   3  22 450.912 550.752   0
   0   3  22 127.966 615.785   3
   0   3  23 1810.62 573.778   0
   0   3  23 2248.02 708.472   3
   0  -3  23 1909.05 691.641   3
   0  -3  24 64.4867 662.509   3
   0   3  24 0.27452 686.277   3
   0  -3  25 410.395 743.157   3
   0   3  25 97.7692 668.581   3
   0  -3  26 174.095 654.042   3
   0   3  26 399.434 643.358   3
   0   3  27 220.307 653.944   3
   0  -3  27 874.522 812.767   3
   0  -4  -3 214151. 962.977   3
   0  -4   3 214966. 4075.91   3
   0   4   3 217390. 3818.81   3
   0   4  -3 215923. 1046.77   3
   0   4  -4 35263.3 503.239   3
   0  -4  -4 35632.1 456.788   3
   0  -4   4 34337.3 529.127   3
   0   4   4 35024.5 481.205   3
   0   4   5 23241.1 461.712   3
   0  -4  -5 23902.4 428.761   3
   0  -4   5 23449.6 519.993   3
   0   4  -5 23582.1 466.142   3
   0   4  -5 24657.1 465.332   0
   0   4   6 34171.7 568.597   3
   0  -4  -6 35158.2 539.217   3
   0  -4   6 35357.0 606.674   3
   0   4  -6 37046.9 548.612   0
   0  -4   7 3309.45 358.751   3
   0   4   7 3522.48 346.630   3
   0   4  -7 3305.07 290.843   0
   0   4   8 2057.24 337.218   3
   0  -4   8 1920.61 417.422   3
   0  -4   9 230673. 1615.13   3
   0   4   9 223135. 1494.33   3
   0  -4   9 225663. 1406.33   0
   0  -4  10 32417.7 721.431   3
   0   4  10 32451.3 678.438   3
   0  -4  10 31403.0 639.423   0
   0  -4  11 12786.5 585.191   3
   0   4 -11 11931.9 170.576   1
   0   4  11 12964.5 526.602   3
   0  -4  11 12549.8 509.869   0
   0   4  11 12442.7 287.690   1
   0  -4  12 4962.02 506.502   3
   0  -4  12 4909.12 440.511   0
   0   4  12 4094.18 442.492   3
   0   4  12 4505.82 208.748   1
   0  -4  13 17512.8 615.553   0
   0  -4  13 16957.9 683.431   3
   0   4  13 16288.3 305.869   1
   0   4  13 17430.9 639.655   3
   0  -4  14 535.059 494.217   3
   0   4  14 321.179 137.087   1
   0   4  14 436.076 449.209   3
   0  -4  14 556.839 444.122   0
   0  -4  15 102216. 1448.53   3
   0   4  15 99931.9 1386.72   3
   0  -4  15 100409. 1258.58   0
   0  -4  16 1004.52 602.005   3
   0  -4  16 899.123 491.402   0
   0   4  16 28.1466 497.018   3
   0  -4  17 809.193 585.939   3
   0   4  17 835.726 550.615   3
   0  -4  18 4152.96 608.969   3
   0   4  18 3102.41 551.588   0
   0   4  18 3144.63 582.139   3
   0   4  19 5371.05 631.253   3
   0   4  19 5393.88 606.634   0
   0  -4  19 6411.09 675.411   3
   0  -4  20 1923.12 677.296   3
   0   4  20 980.525 530.773   0
   0   4  20 1125.27 569.692   3
   0  -4  21 3471.40 682.452   3
   0   4  21 3574.92 662.470   3
   0  -4  22 664.059 638.621   3
   0   4  22 469.015 523.199   0
   0   4  22 324.274 622.813   3
   0   4  23 3754.53 604.393   0
   0   4  23 3461.86 734.708   3
   0  -4  23 3821.70 784.852   3
   0   4  24 3745.44 753.851   3
   0  -4  24 2943.95 693.395   3
   0  -4  25 2552.51 788.689   3
   0   4  25 1861.25 722.514   3
   0  -4  26 359.468 754.284   3
   0   4  26 184.476 641.267   3
   0   4  27 3581.82 742.169   3
   0  -4  27 2628.64 751.688   3
   0  -5   1 123414. 752.371   3
   0   5  -1 123729. 755.794   3
   0   5  -2 701661. 7413.07   3
   0  -5   2 711104. 7360.00   3
   0  -5   3 328432. 1368.60   3
   0   5  -3 333174. 1370.09   3
   0  -5  -3 327849. 1284.32   3
   0  -5  -4 142751. 908.355   3
   0   5   4 139782. 917.506   3
   0   5  -4 139871. 971.760   3
   0  -5   4 138152. 971.830   3
   0  -5   5 25433.8 530.119   3
   0   5   5 25497.5 507.387   3
   0  -5  -5 25695.1 443.136   3
   0   5  -5 26356.2 488.836   0
   0   5  -6 27991.4 492.900   0
   0  -5   6 28034.7 578.257   3
   0  -5  -6 27706.0 493.197   3
   0   5   6 28123.6 542.705   3
   0  -5   7 121422. 1096.19   3
   0   5   7 123654. 1038.67   3
   0   5   8 215575. 1421.91   3
   0  -5   8 216942. 1521.48   3
   0   5   9 411.523 328.707   3
   0  -5   9 286.402 360.032   3
   0  -5  10 38117.9 788.959   3
   0   5  10 37008.0 708.055   3
   0  -5  11 8992.36 556.209   3
   0   5  11 8133.98 469.797   3
   0   5  12 475.044 366.062   3
   0   5 -12 443.218 93.3914   1
   0  -5  12 691.370 427.624   3
   0   5  12 570.792 185.323   1
   0  -5  13 23542.8 758.090   3
   0   5  13 22125.3 391.659   1
   0   5  13 23436.9 709.713   3
   0  -5  14 12146.2 687.023   3
   0   5  14 12478.5 633.890   3
   0  -5  15 515.816 567.462   3
   0   5  15 390.052 491.048   3
   0  -5  16 30762.0 965.814   3
   0   5  16 29578.2 875.983   3
   0   5  17 10702.4 699.746   3
   0  -5  17 10221.7 720.812   3
   0  -5  18 25.7325 536.616   3
   0   5  18 59.7936 492.916   3
   0  -5  19 1215.89 599.055   3
   0   5  19 1542.55 587.581   3
   0   5  19 1213.76 518.179   0
   0   5  20 7548.02 722.424   3
   0   5  20 7689.15 641.708   0
   0  -5  20 8974.68 811.276   3
   0  -5  21 8987.70 826.902   3
   0   5  21 8591.64 717.755   3
   0   5  21 8364.12 670.188   0
   0   5  22 5012.09 679.549   3
   0   5  22 5270.00 641.442   0
   0  -5  22 4228.58 687.441   3
   0   5  23 998.041 568.907   0
   0   5  23 1227.47 614.604   3
   0  -5  23 1316.28 717.092   3
   0   5  24 1269.03 647.002   3
   0  -5  24 988.182 750.026   3
   0   5  25 1340.76 658.458   3
   0  -5  25 1162.22 682.270   3
   0   5  26 6853.93 807.518   3
   0  -5  26 7250.42 897.780   3
   0   5  27 2168.91 716.256   3
   0  -5  27 2083.57 842.756   3
   0  -6   0 256084. 3616.49   2
   0   6   0 246279. 911.287   2
   0   6  -1 43862.4 520.945   3
   0   6   1 43770.4 432.782   2
   0  -6   1 44552.9 411.612   2
   0  -6   1 44304.9 536.061   3
   0   6  -2 219822. 1139.01   3
   0  -6   2 221064. 1135.82   3
   0  -6   3 8915.48 369.925   3
   0   6  -3 8113.48 306.373   3
   0  -6  -3 8494.94 293.904   3
   0  -6  -4 631133. 7787.99   3
   0  -6   4 632256. 8356.32   3
   0  -6  -5 73006.7 741.617   3
   0   6   5 73644.2 767.825   3
   0  -6   5 74100.9 834.666   3
   0  -6   6 287267. 1606.89   3
   0   6   6 287533. 1506.41   3
   0   6   7 10053.2 426.896   3
   0  -6   7 10624.7 487.743   3
   0   6   8 24800.2 573.768   3
   0  -6   8 25431.7 665.347   3
   0  -6   9 29286.6 687.248   3
   0   6   9 28492.3 630.134   3
   0   6  10 16909.8 541.159   3
   0  -6  10 16834.3 590.953   3
   0  -6  11 22688.3 711.503   3
   0   6  11 23918.0 645.668   3
   0   6  12 1890.11 411.675   3
   0  -6  12 1490.20 488.414   3
   0  -6  13 3368.43 549.156   3
   0   6 -13 2881.78 136.074   1
   0   6  13 3254.90 484.027   3
   0   6  13 2709.81 241.832   1
   0  -6  14 25667.3 829.297   3
   0   6  14 25287.7 770.512   3
   0   6  15-39.6277 451.842   3
   0  -6  15 213.697 505.088   3
   0   6  16 323.938 501.317   3
   0  -6  16 197.518 547.528   3
   0   6  17 885.490 532.633   3
   0  -6  17-41.6632 566.736   3
   0   6  18 14613.0 754.917   3
   0  -6  18 14548.8 795.768   3
   0   6  19 4113.40 645.771   3
   0  -6  19 4842.87 663.257   3
   0   6  20 16236.3 791.025   0
   0  -6  20 17336.9 907.861   3
   0   6  20 17730.4 852.398   3
   0   6  21 290.467 582.909   3
   0   6  21-272.133 510.178   0
   0  -6  21 751.426 696.449   3
   0   6  22 2618.85 572.392   0
   0   6  22 2863.29 682.458   3
   0  -6  22 3149.98 749.136   3
   0   6  23 711.596 571.139   0
   0   6  23 1269.45 644.514   3
   0  -6  23 778.735 644.469   3
   0  -6  24 10252.7 895.091   3
   0   6  24 9290.35 805.312   3
   0   6  25 1074.42 656.905   3
   0  -6  25 786.324 789.924   3
   0  -6  26 825.184 753.317   3
   0   6  26 1019.97 677.898   3
   0   6  27 198.325 649.128   3
   0   7   0 221.886 191.448   2
   0  -7   0 107.849 265.748   3
   0  -7   0 505.357 194.723   2
   0  -7   1 34195.0 522.527   3
   0   7   1 34084.6 421.165   2
   0  -7   1 34415.4 404.336   2
   0   7  -2 286642. 1382.60   3
   0   7   2 285779. 1199.16   2
   0  -7   2 284954. 5346.74   3
   0  -7   3 6049.73 397.162   3
   0   7  -3 5218.46 305.514   3
   0  -7  -4 247401. 1298.42   3
   0  -7   4 246115. 1419.41   3
   0  -7   5 58.4793 367.257   3
   0  -7   6 137157. 1178.91   3
   0   7   6 136922. 1097.31   3
   0   7   7 5850.01 389.694   3
   0  -7   7 6145.23 443.317   3
   0   7   8 75372.5 913.321   3
   0  -7   8 76851.5 1003.58   3
   0   7   9 238.972 329.145   3
   0  -7   9 330.968 374.972   3
   0   7  10 3586.09 398.702   3
   0  -7  10 3866.26 483.908   3
   0   7  11 9223.71 493.307   3
   0  -7  11 9054.12 568.460   3
   0  -7  12 23644.1 755.412   3
   0   7  12 23730.1 697.447   3
   0   7  13 881.640 433.112   3
   0  -7  13 1134.71 535.728   3
   0   7  14 9712.98 598.741   3
   0   7 -14 8949.94 200.093   1
   0  -7  14 10330.3 675.494   3
   0  -7  15 13539.8 739.834   3
   0   7  15 14535.2 703.167   3
   0  -7  16 17248.3 809.266   3
   0   7  16 17261.9 764.538   3
   0  -7  17 549.853 581.899   3
   0   7  17 743.443 529.425   3
   0  -7  18 5527.82 685.787   3
   0   7  18 5874.47 607.330   3
   0   7  19 975.335 559.838   3
   0  -7  19 634.187 607.740   3
   0   7  20 6430.58 690.281   3
   0  -7  20 6073.02 706.768   3
   0  -7  21 2571.51 635.186   3
   0   7  21 1949.63 601.724   3
   0   7  21 1704.94 576.959   0
   0  -7  22 11400.5 882.353   3
   0   7  22 8977.18 687.367   0
   0   7  22 11127.5 789.202   3
   0   7  23 930.513 566.281   0
   0  -7  23 1043.24 747.416   3
   0   7  23 1237.22 659.877   3
   0  -7  24 1419.89 796.103   3
   0   7  24 632.100 679.136   3
   0  -7  25 426.193 650.554   3
   0   7  25 522.682 663.330   3
   0  -7  26 5100.77 821.405   3
   0   7  26 5363.24 758.073   3
   0   7  27 1230.29 679.636   3
   0  -8   0 419088. 6539.34   3
   0  -8   0 424525. 5374.70   2
   0   8   0 419942. 5391.66   2
   0  -8   1 994.984 335.796   3
   0  -8   1 813.901 214.924   2
   0   8   1 634.844 215.255   2
   0   8   2 994.569 217.801   2
   0  -8   2 1004.69 349.891   3
   0  -8   3 186361. 1235.80   3
   0  -8   4 120014. 1059.40   3
   0  -8   5 131891. 1147.57   3
   0  -8   6 43458.2 743.129   3
   0   8   7 6534.51 398.777   3
   0  -8   7 6502.98 449.300   3
   0  -8   8 177.822 364.350   3
   0   8   8 144.333 315.504   3
   0  -8   9 5698.29 487.431   3
   0   8   9 5836.98 404.843   3
   0  -8  10 8525.74 530.511   3
   0   8  10 10649.6 501.154   3
   0   8  11 7423.01 485.541   3
   0  -8  11 6697.16 536.306   3
   0   8  12 120.251 403.652   3
   0  -8  12 510.020 506.332   3
   0  -8  13 15829.5 742.979   3
   0   8  13 14295.4 639.349   3
   0   8  14 24894.2 795.232   3
   0  -8  14 25732.3 875.928   3
   0   8 -15 21831.5 292.159   1
   0  -8  15 23212.0 867.232   3
   0   8  15 21445.6 780.872   3
   0  -8  16 2565.59 646.109   3
   0   8  16 2523.27 536.357   3
   0  -8  17 899.181 643.648   3
   0   8  17 765.475 533.720   3
   0  -8  18 8898.43 796.552   3
   0   8  18 8185.67 665.368   3
   0   8  19 2605.11 580.030   3
   0  -8  19 2949.66 711.549   3
   0   8  20 5664.50 679.639   3
   0  -8  20 5378.04 766.906   3
   0  -8  21 3788.39 754.667   3
   0   8  21 3542.89 629.740   3
   0   8  22 107.301 554.499   0
   0   8  22 112.028 610.463   3
   0  -8  22 562.715 671.186   3
   0   8  23 1168.70 575.917   0
   0   8  23 1138.37 603.456   3
   0  -8  23 1184.25 658.342   3
   0  -8  24 14825.8 987.291   3
   0   8  24 15037.0 945.206   3
   0   8  25 429.187 684.290   3
   0  -8  25 314.282 765.039   3
   0  -8  26 1002.48 828.394   3
   0   8  26 221.530 680.389   3
   0   8  27-6.50784 692.616   3
   0  -9   0 1466.39 249.359   2
   0  -9   0 628.761 337.601   3
   0  -9   1 373.063 337.838   3
   0  -9   1 39.4169 210.834   2
   0   9   1 75.2491 199.651   2
   0   9   2 14103.9 344.776   2
   0  -9   2 14546.3 465.756   3
   0  -9   3 198899. 1343.66   3
   0   9   3 202676. 1181.70   2
   0  -9   4 30751.1 638.765   3
   0  -9   5 11473.0 472.988   3
   0  -9   6 10647.9 500.322   3
   0  -9   7 246919. 1719.57   3
   0  -9   8 5747.92 461.088   3
   0  -9   9 789.756 448.665   3
   0   9   9 993.489 341.519   3
   0   9  10 5084.43 437.734   3
   0  -9  10 5209.11 508.625   3
   0   9  11 60133.3 982.610   3
   0  -9  11 61967.0 1087.12   3
   0  -9  12 4974.99 583.048   3
   0   9  12 4558.99 488.783   3
   0  -9  13 66062.1 1214.48   3
   0   9  13 65260.9 1100.62   3
   0   9  14 4187.41 537.574   3
   0  -9  14 3824.69 580.304   3
   0  -9  15 895.879 590.748   3
   0   9  15 770.017 516.063   3
   0  -9  16 612.273 642.323   3
   0   9  16 104.872 488.414   3
   0   9  17 33734.9 968.656   3
   0  -9  17 34172.7 1074.70   3
   0   9  18 948.502 556.219   3
   0  -9  18 1018.29 605.621   3
   0   9  19 1327.24 538.972   3
   0  -9  19 1580.41 628.233   3
   0  -9  20 235.765 595.528   3
   0   9  20 245.461 532.620   3
   0   9  21 1312.51 612.044   3
   0  -9  21 1488.55 653.659   3
   0  -9  22 1559.79 709.313   3
   0   9  22 2095.01 623.958   3
   0   9  23 1304.16 641.522   3
   0  -9  23 1660.67 771.766   3
   0   9  23 791.620 566.433   0
   0  -9  24 378.865 777.607   3
   0   9  24 272.003 608.374   3
   0  -9  25 1548.37 808.845   3
   0   9  25 1377.21 674.812   3
   0  -9  26 340.826 737.378   3
   0   9  26 116.890 704.134   3
   0   9  27 1219.23 748.607   3
   0 -10   0 117369. 1021.91   3
   0 -10   0 117605. 829.685   2
   0 -10   1 254342. 1494.35   3
   0  10   1 255435. 1223.26   2
   0 -10   1 257037. 1189.29   2
   0 -10   2 1379.54 237.772   2
   0 -10   2 1674.36 364.047   3
   0  10   2 1372.13 232.561   2
   0  10   3 5192.70 297.320   2
   0 -10   3 5770.96 425.438   3
   0 -10   4 859.654 349.244   3
   0 -10   5 71525.5 941.678   3
   0 -10   6 6724.95 441.111   3
   0 -10   7 55908.1 918.605   3
   0 -10   8 535.457 403.381   3
   0 -10   9 28010.8 770.814   3
   0  10  10 3064.71 427.486   3
   0 -10  10 3224.97 497.391   3
   0 -10  11 73922.6 1204.99   3
   0  10  11 75406.3 1103.91   3
   0  10  12 508.683 440.436   3
   0 -10  12 991.186 510.666   3
   0  10  13 18126.4 716.033   3
   0 -10  13 17415.0 800.741   3
   0  10  14 165.398 480.645   3
   0 -10  14 475.124 581.980   3
   0  10  15 38641.6 965.594   3
   0 -10  15 39781.6 1101.91   3
   0 -10  16 3236.58 618.127   3
   0  10  16 2920.07 550.330   3
   0  10  17 790.138 511.946   3
   0 -10  17 803.939 603.866   3
   0 -10  18 1260.39 677.759   3
   0  10  18 1686.56 577.703   3
   0  10  19 20371.6 895.230   3
   0 -10  19 21808.9 1019.25   3
   0 -10  20 383.473 701.362   3
   0  10  20 494.687 548.808   3
   0 -10  21 2281.84 767.413   3
   0  10  21 2435.76 610.917   3
   0 -10  22 793.176 750.967   3
   0  10  22 622.814 642.182   3
   0  10  23 6737.58 708.902   0
   0  10  23 7784.00 750.334   3
   0 -10  23 7636.61 900.663   3
   0 -10  24 296.006 730.647   3
   0  10  24 1238.21 693.560   3
   0 -10  25-195.525 693.008   3
   0  10  25 119.277 630.392   3
   0  10  26 921.544 707.264   3
   0  10  27-286.035 738.419   3
   0 -11   0 1703.94 278.272   2
   0 -11   0 1928.20 381.479   3
   0 -11   1 161493. 1264.74   3
   0 -11   1 162386. 1007.20   2
   0  11   1 163288. 1035.67   2
   0  11   2 194869. 1175.98   2
   0 -11   2 191450. 1390.37   3
   0 -11   2 194824. 1117.10   2
   0 -11   3 96257.6 1034.94   3
   0 -11   4 126714. 1213.53   3
   0 -11   5 2401.61 380.142   3
   0 -11   6 48227.2 868.084   3
   0 -11   7 16998.7 621.840   3
   0 -11   8 32923.1 812.795   3
   0 -11   9 17283.8 661.638   3
   0 -11  10 572.255 497.055   3
   0 -11  11 30691.6 880.647   3
   0 -11  12 20880.3 823.671   3
   0  11  12 21113.3 723.290   3
   0  11  13 62.7201 457.317   3
   0 -11  13 154.353 529.715   3
   0 -11  14 9840.88 745.279   3
   0  11  14 9583.87 625.368   3
   0  11  15 16166.0 728.537   3
   0 -11  15 16441.5 815.832   3
   0 -11  16 615.011 657.412   3
   0  11  16 400.750 522.724   3
   0  11  17 27208.4 903.155   3
   0 -11  17 30003.2 1054.39   3
   0  11  18 3659.44 618.930   3
   0 -11  18 3456.95 649.773   3
   0 -11  19 4867.31 682.031   3
   0  11  19 5884.37 675.264   3
   0  11  20 9219.27 755.493   3
   0 -11  20 9450.03 804.482   3
   0 -11  21 10341.2 851.702   3
   0  11  21 9189.77 775.357   3
   0  11  22 1983.91 623.989   3
   0 -11  22 2621.39 711.352   3
   0 -11  23 2586.36 709.010   3
   0  11  23 1888.44 674.939   3
   0 -11  24 195.724 673.774   3
   0  11  24 73.3274 623.917   3
   0 -11  25 2060.66 750.718   3
   0  11  25 1961.66 720.842   3
   0  11  26 3182.29 737.772   3
   0  11  27 1508.10 722.080   3
   0 -12   0 357611. 1908.76   3
   0 -12   0 366999. 6201.15   2
   0  12   1 47011.8 607.631   2
   0 -12   1 47776.6 610.789   2
   0 -12   1 47655.5 779.011   3
   0 -12   2 8611.63 466.870   3
   0 -12   2 7812.72 338.623   2
   0 -12   3 25329.3 644.819   3
   0 -12   4 61242.7 923.075   3
   0 -12   5 54077.1 895.493   3
   0 -12   6 101056. 1219.22   3
   0 -12   7 29160.1 779.562   3
   0 -12   8 6991.00 540.770   3
   0 -12   9 29361.4 824.717   3
   0 -12  10 14022.1 663.707   3
   0 -12  11 1363.80 497.237   3
   0 -12  12 1121.20 538.165   3
   0 -12  13 1252.23 617.735   3
   0 -12  14 10745.4 752.770   3
   0  12  15 9276.80 640.838   3
   0 -12  15 10669.5 790.813   3
   0  12  16 506.039 527.437   3
   0 -12  16 178.828 558.988   3
   0  12  17 1281.90 528.299   3
   0 -12  17 1835.57 692.315   3
   0  12  18 22479.9 908.631   3
   0 -12  18 25331.3 1056.75   3
   0  12  19 787.119 559.734   3
   0 -12  19 279.861 644.670   3
   0  12  20 1185.49 579.029   3
   0 -12  20 416.072 638.294   3
   0  12  21 7378.64 739.173   3
   0 -12  21 7503.41 785.520   3
   0 -12  22 3228.15 712.374   3
   0  12  22 3273.16 692.688   3
   0 -12  23 597.173 680.076   3
   0  12  23-96.1613 607.429   3
   0 -12  24 5310.26 810.522   3
   0  12  24 5316.56 725.027   3
   0 -12  25 548.973 766.184   3
   0  12  25 1076.45 671.525   3
   0  12  26 19.7874 657.855   3
   0 -13   0 4856.45 340.015   2
   0 -13   0 4506.12 451.052   3
   0 -13   1 7120.88 341.957   2
   0 -13   1 7622.16 441.216   3
   0 -13  -1 6859.56 433.434   3
   0 -13   2 225991. 1636.34   3
   0 -13   2 226176. 1295.94   2
   0 -13   3 45428.2 639.048   2
   0 -13   3 44184.4 804.767   3
   0 -13   4 28038.9 708.899   3
   0 -13   5 349.455 426.374   3
   0 -13   6 15556.6 650.852   3
   0 -13   7 3127.09 501.880   3
   0 -13   8 29832.9 808.232   3
   0 -13   9 606.761 521.970   3
   0 -13  10 2577.89 561.668   3
   0 -13  11 3034.59 596.434   3
   0 -13  12 4369.87 659.874   3
   0 -13  13 1640.60 634.438   3
   0 -13  14 4242.57 637.731   3
   0 -13  15 3284.63 700.546   3
   0 -13  16 29647.4 1044.57   3
   0 -13  17 250.825 603.376   3
   0 -13  18 10752.0 862.923   3
   0 -13  19 554.554 699.128   3
   0 -13  20 17816.0 1015.99   3
   0 -13  21 67.2812 692.823   3
   0 -13  22 9128.94 877.200   3
   0 -13  23 378.111 711.820   3
   0 -13  24 216.836 747.909   3
   0 -14   0 53472.2 875.567   3
   0 -14   0 56166.0 709.403   2
   0 -14   1 3275.16 300.553   2
   0 -14  -1 3154.71 407.169   3
   0 -14   1 4171.95 440.060   3
   0 -14   2 3046.99 478.503   3
   0 -14   2 945.958 307.489   2
   0 -14   3 1322.99 301.672   2
   0 -14   3 1715.85 419.882   3
   0 -14   4 141727. 1426.74   3
   0 -14   5 17528.8 661.617   3
   0 -14   6 36924.7 857.146   3
   0 -14   7 1883.17 515.796   3
   0 -14   8 3297.14 498.317   3
   0 -14   9 23481.7 816.492   3
   0 -14  10 27794.8 884.777   3
   0 -14  11 806.325 589.678   3
   0 -14  12 5872.79 719.647   3
   0 -14  13 19244.8 875.194   3
   0 -14  14 20172.3 903.514   3
   0 -14  15 6661.72 744.622   3
   0 -14  16 469.648 645.547   3
   0 -14  17 967.070 609.228   3
   0 -14  18 1258.22 685.145   3
   0 -14  19 1601.92 741.203   3
   0 -14  20 9559.68 906.377   3
   0 -14  21 1632.50 754.859   3
   0 -14  22 1761.23 748.295   3
   0 -14  23 1031.50 739.688   3
   0 -14  24 2141.56 788.348   3
   0 -15   0 1063.96 300.998   2
   0 -15   0 1232.28 418.525   3
   0 -15   1 9534.56 385.647   2
   0 -15   1 10317.7 528.313   3
   0 -15  -1 9975.08 522.717   3
   0 -15   2 29678.1 561.265   2
   0 -15   2 29872.1 748.716   3
   0 -15   3 67175.9 1034.97   3
   0 -15   3 65938.0 803.640   2
   0 -15   4 1191.01 331.126   2
   0 -15   4 1449.92 506.306   3
   0 -15   5 41916.4 915.801   3
   0 -15   6 9714.60 592.899   3
   0 -15   7 40418.2 935.538   3
   0 -15   8 14548.3 708.265   3
   0 -15   9 6154.83 629.477   3
   0 -15  10 5195.58 638.484   3
   0 -15  11 43538.7 1114.17   3
   0 -15  12 11641.9 807.661   3
   0 -15  13 55149.7 1257.41   3
   0 -15  14 7510.05 747.867   3
   0 -15  15 1059.05 642.108   3
   0 -15  16-77.8380 641.847   3
   0 -15  17 10525.8 800.088   3
   0 -15  18 6335.51 765.679   3
   0 -15  19 1896.49 767.959   3
   0 -15  20 321.238 746.971   3
   0 -15  21 4145.05 797.129   3
   0 -15  22 657.269 725.296   3
   0 -15  23 40.2175 709.416   3
   0 -15  24 712.256 718.066   3
   0 -16   0 1749.31 458.428   3
   0 -16  -1 51964.8 930.637   3
   0 -16   1 53877.5 741.312   2
   0 -16   1 54431.0 954.869   3
   0 -16   2 25313.3 568.789   2
   0 -16   2 25715.3 745.982   3
   0 -16  -2 26304.4 732.795   3
   0 -16   3 48155.6 948.377   3
   0 -16   3 48785.5 735.359   2
   0 -16   4 4997.14 392.361   2
   0 -16   4 5327.15 546.070   3
   0 -16   5 25571.7 787.737   3
   0 -16   6-70.5704 489.735   3
   0 -16   7 1409.07 537.505   3
   0 -16   8 1596.94 574.131   3
   0 -16   9 70226.9 1254.35   3
   0 -16  10 8469.78 662.315   3
   0 -16  11 34826.0 1025.68   3
   0 -16  12 10302.4 812.197   3
   0 -16  13 7431.71 758.273   3
   0 -16  14 687.317 601.851   3
   0 -16  15 29406.4 1077.03   3
   0 -16  16 2338.55 681.224   3
   0 -16  17 279.340 600.462   3
   0 -16  18 184.205 682.740   3
   0 -16  19 11738.4 943.806   3
   0 -16  20 335.106 733.251   3
   0 -16  21 1402.87 713.500   3
   0 -16  22 870.753 660.970   3
   0 -16  23 2613.10 745.235   3
   0 -17   0 1286.03 494.545   3
   0 -17  -1 58912.1 1018.69   3
   0 -17   1 58377.9 806.976   2
   0 -17   1 59492.7 1038.77   3
   0 -17   2 89995.4 1254.38   3
   0 -17  -2 90781.3 1220.42   3
   0 -17   2 86118.5 956.889   2
   0 -17   3 22170.1 558.729   2
   0 -17   3 23559.0 779.307   3
   0 -17   4 53726.5 799.173   2
   0 -17   4 53969.1 1039.81   3
   0 -17   5 481.632 328.711   2
   0 -17   5 422.972 472.964   3
   0 -17   6 2240.82 573.773   3
   0 -17   7 105919. 1462.43   3
   0 -17   8 18257.0 778.393   3
   0 -17   9 1021.60 586.944   3
   0 -17  10 32.2305 575.104   3
   0 -17  11 25137.5 923.202   3
   0 -17  12 1493.37 610.997   3
   0 -17  13 17966.7 922.374   3
   0 -17  14 572.395 569.408   3
   0 -17  15 412.253 674.271   3
   0 -17  16 9121.95 768.193   3
   0 -17  17 9371.29 831.049   3
   0 -17  18 917.191 734.484   3
   0 -17  19 118.996 712.268   3
   0 -17  20 2380.98 691.608   3
   0 -17  21 3545.60 747.405   3
   0 -17  22 747.933 719.811   3
   0 -17  23 3347.43 818.072   3
   0 -18   0 100036. 1327.73   3
   0 -18  -1 43122.3 938.350   3
   0 -18   1 42747.4 731.367   2
   0 -18   1 43195.6 939.006   3
   0 -18  -2 2452.38 520.653   3
   0 -18   2 1385.37 376.983   2
   0 -18   2 2436.70 520.797   3
   0 -18   3 15766.7 510.086   2
   0 -18   3 16471.6 705.337   3
   0 -18   4 12464.7 697.502   3
   0 -18   4 9654.35 471.591   2
   0 -18   5 21315.0 586.314   2
   0 -18   5 20033.4 763.262   3
   0 -18   6 40793.5 1014.04   3
   0 -18   6 38535.8 744.001   2
   0 -18   7 8477.55 716.884   3
   0 -18   8 848.294 589.346   3
   0 -18   9 409.094 560.430   3
   0 -18  10 2727.35 650.120   3
   0 -18  11 16170.3 872.943   3
   0 -18  12 824.290 610.466   3
   0 -18  13 9837.03 756.927   3
   0 -18  14 4341.73 725.636   3
   0 -18  15 3257.93 679.723   3
   0 -18  16-132.698 632.420   3
   0 -18  17 222.400 711.314   3
   0 -18  18 7895.85 837.172   3
   0 -18  19 5304.49 760.612   3
   0 -18  20 912.741 721.266   3
   0 -18  21 684.262 796.410   3
   0 -18  22 1747.22 844.606   3
   0 -19   0 3035.18 569.807   3
   0 -19   1 27196.9 628.520   2
   0 -19   1 27107.0 826.680   3
   0 -19  -1 27129.0 824.207   3
   0 -19  -2 54730.3 1056.73   3
   0 -19   2 57148.0 1104.66   3
   0 -19   2 55590.9 833.373   2
   0 -19   3 377.683 489.664   3
   0 -19  -3 419.205 490.926   3
   0 -19   3 269.270 362.431   2
   0 -19   4 65671.1 914.724   2
   0 -19   4 67202.4 1214.91   3
   0 -19   5 11866.8 688.137   3
   0 -19   5 11543.5 499.323   2
   0 -19   6 33765.3 719.844   2
   0 -19   6 36407.6 1005.37   3
   0 -19   7 1344.33 632.657   3
   0 -19   8 28688.5 979.860   3
   0 -19   9 2024.25 651.165   3
   0 -19  10 90.2750 614.934   3
   0 -19  11-268.708 545.253   3
   0 -19  12 26153.5 1020.12   3
   0 -19  13 1470.35 649.762   3
   0 -19  14 873.053 630.850   3
   0 -19  15-160.201 637.334   3
   0 -19  16 2440.70 743.941   3
   0 -19  17 17.3020 619.860   3
   0 -19  18 980.739 693.102   3
   0 -19  19 859.930 797.324   3
   0 -19  20 9924.65 988.564   3
   0 -19  21 206.969 813.343   3
   0 -19  22 7778.32 942.300   3
   0 -20   0 76035.5 1259.17   3
   0 -20   1 2519.50 544.118   3
   0 -20  -1 1881.95 512.060   3
   0 -20  -2 22559.7 805.172   3
   0 -20   2 21342.2 797.364   3
   0 -20   2 21466.8 582.360   2
   0 -20   3 156.275 325.163   2
   0 -20  -3 70.9146 480.248   3
   0 -20   3-77.0103 536.513   3
   0 -20   4 3675.93 574.447   3
   0 -20   4 3555.10 413.532   2
   0 -20   5 6359.26 446.732   2
   0 -20   5 6943.90 632.644   3
   0 -20   6 6062.93 676.995   3
   0 -20   6 6193.46 454.664   2
   0 -20   7 5784.01 693.186   3
   0 -20   7 5178.27 462.357   2
   0 -20   8 15558.8 846.358   3
   0 -20   9 4425.83 655.485   3
   0 -20  10 5266.21 646.692   3
   0 -20  11 3744.58 711.158   3
   0 -20  12 175.891 630.160   3
   0 -20  13 603.580 634.719   3
   0 -20  14 2564.63 697.476   3
   0 -20  15 3215.82 726.643   3
   0 -20  16 3320.56 686.221   3
   0 -20  17 603.721 742.382   3
   0 -20  18 9407.40 970.563   3
   0 -20  19 154.383 745.082   3
   0 -20  20 2040.18 720.408   3
   0 -20  21 707.171 679.905   3
   0 -21   0 1467.11 565.091   3
   0 -21  -1 1740.70 518.008   3
   0 -21   1 1428.48 572.181   3
   0 -21   2 46244.5 804.950   2
   0 -21   2 45848.6 1054.30   3
   0 -21  -2 46161.2 1039.37   3
   0 -21   3 5161.99 441.614   2
   0 -21  -3 5418.01 594.590   3
   0 -21   3 4749.34 597.928   3
   0 -21  -4 26901.3 873.051   3
   0 -21   4 25975.7 900.287   3
   0 -21   4 25757.0 647.773   2
   0 -21   5 21358.3 611.974   2
   0 -21   5 20530.3 866.560   3
   0 -21   6 19358.3 608.455   2
   0 -21   6 21463.3 912.220   3
   0 -21   7 13214.8 571.818   2
   0 -21   7 14051.3 833.392   3
   0 -21   8 17913.3 860.563   3
   0 -21   8 18179.2 637.844   2
   0 -21   9 2846.78 620.302   3
   0 -21  10 176.329 642.826   3
   0 -21  11 25530.5 1026.42   3
   0 -21  12-11.8448 567.102   3
   0 -21  13 6185.33 775.552   3
   0 -21  14 1110.57 610.090   3
   0 -21  15 1174.64 685.425   3
   0 -21  16 10859.3 941.743   3
   0 -21  17 11958.7 920.157   3
   0 -21  18 7225.28 816.979   3
   0 -21  19 254.035 768.230   3
   0 -21  20 69.0313 811.402   3
   0 -21  21 2388.91 883.554   3
   0 -22   0 3838.44 607.496   3
   0 -22   1 19420.2 830.587   3
   0 -22  -1 19807.0 832.057   3
   0 -22  -2 8052.81 661.816   3
   0 -22   2 8661.92 485.488   2
   0 -22   2 9608.46 722.507   3
   0 -22   3 2766.35 633.198   3
   0 -22   3 2605.45 381.505   2
   0 -22  -3 2684.19 579.874   3
   0 -22   4 1925.77 616.973   3
   0 -22  -4 1902.06 547.175   3
   0 -22   4 1811.59 384.509   2
   0 -22   5 11383.3 780.221   3
   0 -22  -5 11760.6 701.552   3
   0 -22   5 11745.3 533.913   2
   0 -22   6 919.561 380.343   2
   0 -22   6 1363.73 640.749   3
   0 -22   7 1359.80 414.656   2
   0 -22   7 1470.43 651.695   3
   0 -22   8 616.482 603.958   3
   0 -22   8 627.358 408.625   2
   0 -22   9 51074.6 961.067   2
   0 -22   9 53749.0 1277.45   3
   0 -22  10 9291.01 811.646   3
   0 -22  11 5515.98 699.035   3
   0 -22  12 225.494 657.874   3
   0 -22  13 5037.51 709.313   3
   0 -22  14 591.318 717.607   3
   0 -22  15 11215.8 861.113   3
   0 -22  16 3529.17 773.484   3
   0 -22  17 1011.01 816.357   3
   0 -22  18 865.656 794.686   3
   0 -22  19 1611.39 746.517   3
   0 -22  20 2212.02 725.087   3
   0 -23   0 1031.64 584.306   3
   0 -23   1 1157.73 589.776   3
   0 -23  -1 813.160 579.141   3
   0 -23   2 10972.3 748.926   3
   0 -23  -2 10652.6 733.255   3
   0 -23  -3 56634.1 1208.81   3
   0 -23   3 54282.7 905.900   2
   0 -23   3 55244.6 1227.47   3
   0 -23   4 203.994 558.856   3
   0 -23  -4 515.140 547.036   3
   0 -23   4 87.5816 372.475   2
   0 -23   5 20035.1 631.443   2
   0 -23   5 19988.7 882.248   3
   0 -23  -5 20338.1 842.489   3
   0 -23   6 2498.06 637.082   3
   0 -23   6 1729.08 397.505   2
   0 -23   7 22528.0 966.582   3
   0 -23   7 21076.8 671.867   2
   0 -23   8-70.6186 400.892   2
   0 -23   8 221.105 617.875   3
   0 -23   9 1141.24 414.509   2
   0 -23   9 996.207 565.193   3
   0 -23  10 2421.87 688.600   3
   0 -23  10 2121.27 432.736   2
   0 -23  11 8262.27 740.497   3
   0 -23  12 1671.57 698.852   3
   0 -23  13 4200.88 682.617   3
   0 -23  14 3123.27 741.883   3
   0 -23  15 3546.94 817.077   3
   0 -23  16 2693.18 747.588   3
   0 -23  17 10908.2 925.479   3
   0 -23  18 353.151 765.817   3
   0 -23  19 607.962 836.321   3
   0 -24   0 48147.4 1177.08   3
   0 -24  -1 16394.4 821.288   3
   0 -24   1 16590.2 820.891   3
   0 -24   2 1449.46 565.503   3
   0 -24  -2 1989.38 597.157   3
   0 -24   3 8399.80 501.456   2
   0 -24   3 8046.86 693.382   3
   0 -24  -3 8075.23 675.737   3
   0 -24   4 11709.7 535.504   2
   0 -24   4 12917.8 818.879   3
   0 -24  -4 13805.5 774.880   3
   0 -24  -5 19507.6 848.509   3
   0 -24   5 18974.6 907.742   3
   0 -24   5 17413.8 617.170   2
   0 -24   6 16087.7 604.448   2
   0 -24   6 17789.5 857.358   3
   0 -24  -6 18651.7 832.655   3
   0 -24   7 3402.28 657.559   3
   0 -24   7 2883.68 436.152   2
   0 -24   8 1436.90 671.340   3
   0 -24   8 1067.02 399.356   2
   0 -24   9 8486.76 528.467   2
   0 -24   9 9252.32 751.710   3
   0 -24  10 3452.21 714.961   3
   0 -24  11 1296.39 610.494   3
   0 -24  12-46.1209 680.408   3
   0 -24  13 131.475 668.865   3
   0 -24  14 6199.20 774.550   3
   0 -24  15 15466.1 1036.43   3
   0 -24  16 668.250 785.579   3
   0 -24  17 783.102 735.483   3
   0 -24  18 616.592 679.974   3
   0 -24  19 866.525 727.748   3
   0 -25   0 2091.56 636.490   3
   0 -25   1 1569.52 571.846   3
   0 -25  -1 1171.06 598.089   3
   0 -25   2 34861.9 1059.21   3
   0 -25  -2 34005.5 1034.77   3
   0 -25   3 2033.20 663.097   3
   0 -25  -3 2321.43 611.199   3
   0 -25   4 7886.95 730.615   3
   0 -25  -4 7610.87 674.530   3
   0 -25   5 357.218 563.123   3
   0 -25  -5 464.340 546.612   3
   0 -25   6 783.708 651.228   3
   0 -25  -6 406.955 533.743   3
   0 -25   7 3756.70 637.270   3
   0 -25  -7 4076.77 631.740   3
   0 -25   8 9863.23 816.646   3
   0 -25   9 525.103 588.590   3
   0 -25  10 996.501 681.303   3
   0 -25  11 763.506 597.917   3
   0 -25  12 4632.48 793.598   3
   0 -25  13 790.227 725.984   3
   0 -25  14 36.9310 662.729   3
   0 -25  15 120.247 742.336   3
   0 -25  16 6349.47 926.128   3
   0 -25  17 1361.40 838.614   3
   0 -25  18-15.2667 754.478   3
   0 -26   0 50329.5 1249.70   3
   0 -26   1 1426.61 573.040   3
   0 -26  -1 1215.96 564.980   3
   0 -26  -2 775.982 577.881   3
   0 -26   2 1007.16 621.132   3
   0 -26   3 1036.78 599.083   3
   0 -26  -3 1272.79 578.170   3
   0 -26  -4 18540.3 872.357   3
   0 -26   4 18973.1 906.923   3
   0 -26  -5 417.713 540.173   3
   0 -26   5 794.024 646.306   3
   0 -26   6 9492.48 749.407   3
   0 -26  -6 9750.31 731.146   3
   0 -26  -7 1196.15 581.071   3
   0 -26   7 687.930 649.100   3
   0 -26  -8 2614.89 594.947   3
   0 -26   8 2268.85 629.070   3
   0 -26   9 3693.70 727.804   3
   0 -26  10 6184.89 782.140   3
   0 -26  11-47.2966 595.239   3
   0 -26  12 612.533 749.133   3
   0 -26  13 1431.68 764.792   3
   0 -26  14 8939.61 858.383   3
   0 -26  15 1119.75 716.608   3
   0 -26  16 291.629 780.649   3
   0 -26  17 313.033 828.958   3
   0 -27   0 1497.01 628.824   3
   0 -27   1 1306.48 582.756   3
   0 -27  -1 1095.00 568.535   3
   0 -27   2 8512.66 763.156   3
   0 -27  -2 8550.07 746.114   3
   0 -27  -3 3545.71 619.521   3
   0 -27   3 3537.67 651.404   3
   0 -27   4 3188.90 688.760   3
   0 -27  -4 3181.66 615.049   3
   0 -27  -5 1272.35 607.939   3
   0 -27   5 996.229 583.344   3
   0 -27  -6 8287.24 726.383   3
   0 -27   6 8497.28 808.736   3
   0 -27   7 1141.33 648.111   3
   0 -27  -7 1205.21 580.808   3
   0 -27  -8 4658.50 651.588   3
   0 -27   8 5832.87 747.252   3
   0 -27   9 115.341 678.632   3
   0 -27  10-309.392 601.754   3
   0 -27  11 4900.68 777.975   3
   0 -27  12 13220.4 1008.08   3
   0 -27  13 2406.25 800.143   3
   0 -27  14 928.068 684.592   3
   0 -27  15-106.338 708.169   3
   0 -27  16 614.827 795.307   3
   0 -28   0 4853.54 712.888   3
   0 -28  -1 4309.50 646.730   3
   0 -28   1 3790.50 636.615   3
   0 -28  -2 2063.13 614.500   3
   0 -28   2 1964.13 659.642   3
   0 -28   3 1122.29 656.579   3
   0 -28  -3 2096.51 640.157   3
   0 -28   4 2802.81 638.090   3
   0 -28  -4 3169.32 642.439   3
   0 -28  -5 12300.5 792.549   3
   0 -28   5 12799.9 893.129   3
   0 -28  -6 396.902 556.920   3
   0 -28   6 1003.92 616.802   3
   0 -28   7 663.067 656.889   3
   0 -28  -7 841.878 584.493   3
   0 -28   8 37.9247 685.382   3
   0 -28  -8 133.051 569.633   3
   0 -28   9 2269.13 667.866   3
   0 -28  -9 2343.24 608.118   3
   0 -28  10 3923.65 753.216   3
   0 -28 -10 3786.37 651.338   3
   0 -28  11 1251.40 771.905   3
   0 -28  12 1742.85 805.893   3
   0 -28  13 10451.0 937.563   3
   0 -28  14 2258.40 719.915   3
   0 -28  15 1044.06 749.134   3
   0 -29   0 506.662 625.772   3
   0 -29  -1 5970.27 730.600   3
   0 -29   1 4771.30 668.998   3
   0 -29   2 768.851 615.977   3
   0 -29  -2 643.524 578.744   3
   0 -29   3 6715.99 795.572   3
   0 -29  -3 5982.24 683.148   3
   0 -29  -4 1316.18 625.765   3
   0 -29   4 1564.76 637.102   3
   0 -29   5 433.240 622.533   3
   0 -29  -5 1184.88 642.653   3
   0 -29  -6 1376.51 640.434   3
   0 -29   6 1069.80 708.652   3
   0 -29  -7 11681.9 849.382   3
   0 -29   7 11691.9 911.233   3
   0 -29   8 514.114 632.696   3
   0 -29  -8-174.036 601.445   3
   0 -29  -9 107.544 565.242   3
   0 -29   9 39.4173 687.768   3
   0 -29  10 238.779 743.045   3
   0 -29 -10 53.3723 581.569   3
   0 -29  11 12974.4 1003.43   3
   0 -29 -11 11846.6 864.229   3
   0 -29  12 634.466 707.759   3
   0 -29  13 3225.09 746.170   3
   0 -29  14 392.013 720.896   3
   0 -30   0 10618.5 848.662   3
   0 -30   1 3506.40 670.055   3
   0 -30  -1 4008.30 737.813   3
   0 -30  -2 1624.45 668.167   3
   0 -30   2 1447.43 621.909   3
   0 -30  -3 3477.57 685.547   3
   0 -30   3 2656.09 713.847   3
   0 -30  -4 1255.83 614.897   3
   0 -30   4 1055.52 709.069   3
   0 -30   5 7129.28 791.895   3
   0 -30  -5 7842.84 765.386   3
   0 -30   6 5774.85 751.251   3
   0 -30  -6 5498.04 708.750   3
   0 -30  -7 329.285 611.935   3
   0 -30   7 687.395 705.514   3
   0 -30  -8 718.925 643.225   3
   0 -30   8 409.155 742.495   3
   0 -30  -9 6604.26 759.954   3
   0 -30   9 7183.57 891.744   3
   0 -30  10 88.9434 694.833   3
   0 -30 -10 169.428 591.301   3
   0 -30 -11 6651.92 776.048   3
   0 -30  11 5399.05 790.337   3
   0 -30  12 423.116 702.480   3
   0 -30  13 995.135 772.649   3
   0 -31   0 379.424 648.378   3
   0 -31  -1 3192.43 727.082   3
   0 -31   1 3534.81 698.019   3
   0 -31  -2 7190.81 808.615   3
   0 -31   2 7079.88 778.757   3
   0 -31  -3 8943.85 845.598   3
   0 -31   3 8118.02 820.934   3
   0 -31  -4 8554.32 833.149   3
   0 -31   4 7419.03 839.338   3
   0 -31  -5 368.566 657.016   3
   0 -31   5 297.672 725.810   3
   0 -31  -6 4384.64 727.903   3
   0 -31   6 4132.04 805.015   3
   0 -31   7 2151.98 727.450   3
   0 -31  -7 1322.89 620.272   3
   0 -31  -8 533.518 616.789   3
   0 -31   8 1467.90 700.347   3
   0 -31   9 1466.57 698.863   3
   0 -31  -9 1803.63 698.374   3
   0 -31  10 900.191 750.621   3
   0 -31 -10 900.857 627.008   3
   0 -31  11 693.772 789.752   3
   0 -31  12 249.510 790.667   3
   0 -32   0 5556.80 748.887   3
   0 -32  -1 4578.30 730.249   3
   0 -32   1 3842.98 715.366   3
   0 -32  -2 2633.06 679.699   3
   0 -32   2 2926.83 697.683   3
   0 -32   3-284.435 648.246   3
   0 -32  -3 486.954 607.282   3
   0 -32  -4 5596.26 755.739   3
   0 -32   4 6021.98 815.251   3
   0 -32   5 726.898 710.780   3
   0 -32  -5 1184.30 631.482   3
   0 -32   6 4382.27 834.441   3
   0 -32  -6 4612.41 766.057   3
   0 -32   7 4066.08 842.531   3
   0 -32  -7 3087.98 732.696   3
   0 -32   8 3280.46 849.548   3
   0 -32  -8 2808.96 699.442   3
   0 -32   9 568.883 783.930   3
   0 -32  -9 918.376 682.213   3
   0 -32  10 10994.6 995.461   3
   0 -33   0 530.863 653.668   3
   0 -33   1 125.230 629.539   3
   0 -33  -1 80.1812 652.226   3
   0 -33   2 4893.98 753.972   3
   0 -33  -2 5569.93 759.372   3
   0 -33   3 468.877 659.765   3
   0 -33  -3 303.558 654.702   3
   0 -33   4 766.156 673.689   3
   0 -33  -4 1084.26 698.712   3
   0 -33  -5 4855.89 796.146   3
   0 -33   5 3741.01 756.031   3
   0 -33  -6 1819.85 656.893   3
   0 -33   6 1906.92 695.648   3
   0 -33  -7 1422.09 657.618   3
   0 -33   7 1115.58 693.993   3
   0 -33   8 5814.13 783.254   3
   0 -33  -8 6490.13 812.949   3
   0 -33   9 188.162 672.119   3
   0 -34   0 894.655 645.609   3
   0 -34  -1 1459.79 691.364   3
   0 -34   1 572.894 671.314   3
   0 -34  -2 644.836 706.786   3
   0 -34   2 309.252 651.444   3
   0 -34  -3 789.279 719.428   3
   0 -34   3 93.8978 645.981   3
   0 -34   4 3431.42 761.176   3
   0 -34  -4 4046.30 747.910   3
   0 -34  -5 2460.41 697.312   3
   0 -34   5 2556.14 766.385   3
   0 -34  -6 243.948 705.017   3
   0 -34   6 161.731 720.739   3
   0 -34  -7 363.002 643.871   3
   0 -34   7 76.2161 742.214   3
   0 -35   0-30.6063 704.274   3
   0 -35  -1 896.265 745.684   3
   0 -35   1 135.781 648.023   3
   0 -35  -2 96.2026 707.205   3
   0 -35   2 365.338 663.766   3
   0 -35   3 2017.66 729.480   3
   0 -35  -3 1426.59 688.018   3
   0 -35   4 395.705 709.138   3
   0 -35  -4 320.626 641.140   3
   0 -35  -5-149.600 690.504   3
   0 -35   5 696.561 770.917   3
   0 -36   0 4228.35 831.239   3
   0 -36  -1 3090.63 788.346   3
   0 -36   1 2774.46 748.130   3
   0 -36  -2 1563.01 714.321   3
   0 -36  -3 346.142 671.933   3
   0 -36  -4 214.694 706.117   3
  -1   0  28-157.012 680.285   3
  -1   0  27 190.035 675.237   3
  -1   0  26-339.627 670.020   3
  -1   0  25 1397.60 609.828   0
  -1   0  25 2041.23 655.978   3
  -1   0  24 567.239 639.575   3
  -1   0  24 267.480 628.023   0
  -1   0  23 4307.38 667.037   3
  -1   0  23 4152.65 631.998   0
  -1   0  22 360.617 601.925   3
  -1   0  22-304.325 566.065   0
  -1   0  21 417.319 562.839   3
  -1   0  21 657.709 578.313   0
  -1   0  20 395.561 552.063   3
  -1   0  20-17.6562 542.040   0
  -1   0  19 12678.7 754.343   0
  -1   0  19 13581.1 747.565   3
  -1   0  18 861.478 543.369   3
  -1   0  18 282.245 539.743   0
  -1   0  17 59811.3 1157.58   3
  -1   0  17 59128.7 1163.53   0
  -1   0  16 1054.39 527.132   3
  -1   0  16 925.050 575.481   0
  -1   0  15 75762.4 1216.03   0
  -1   0  15 73918.4 1181.10   3
  -1   0  14 862.165 461.352   3
  -1   0  14 60.2733 529.594   0
  -1   0  13 5613.50 566.313   0
  -1   0  13 6334.10 483.213   3
  -1   0  12 330.668 363.867   3
  -1   0  12 31.8101 428.377   0
  -1   0  11 8513.23 546.020   0
  -1   0  11 9223.04 469.076   3
  -1   0  10 134.540 433.338   0
  -1   0  10 348.950 325.318   3
  -1   0   9 268555. 1657.28   0
  -1   0   9 263536. 1520.42   3
  -1   0   8 105.022 266.715   3
  -1   0   8-232.526 328.377   0
   1   0  -8 63.4732 188.193   1
   1   0  -7 44016.6 477.513   1
  -1   0   7 44326.4 591.659   3
   1   0  -7 43919.1 567.950   3
  -1   0   6-41.5773 274.905   3
   1   0  -6-12.6444 218.161   1
   1   0  -6 56.7692 177.296   3
  -1   0   5 345749. 4917.70   3
   1   0  -5 352273. 4945.74   3
   1   0  -5 350463. 4630.04   1
   1   0  -4 168.905 144.170   3
   1   0  -4 168.097 200.367   1
  -1   0   4 281.358 168.915   3
  -1   0  -3 107044. 707.682   3
   1   0   3 104290. 701.405   3
  -1   0  -4 153.030 223.953   3
   1   0   4 93.8254 243.896   3
   1   0   5 115542. 907.290   3
  -1   0  -5 113099. 888.446   3
   1   0   6-83.1219 336.581   3
   1   0   7 231742. 1027.40   0
   1   0   7 232770. 1447.03   3
   1   0   8-122.351 345.882   3
   1   0   8-56.6255 238.378   0
   1   0   9 65719.3 931.461   3
   1   0   9 63972.5 676.830   0
   1   0  10 134.675 374.649   3
   1   0  10-4.23024 253.667   0
   1   0  11 24206.7 717.254   3
   1   0  11 23967.7 528.828   0
   1   0  12 213.640 298.498   0
   1   0  12-44.0376 439.196   3
   1   0  13 3143.07 497.543   3
   1   0  13 3378.11 394.503   0
   1   0  14 473.204 380.383   0
   1   0  14 679.638 501.543   3
   1   0  15 168872. 1829.67   3
   1   0  15 167384. 1462.21   0
   1   0  16 1898.86 428.761   0
   1   0  16 2375.55 603.928   3
   1   0  17 3801.53 440.169   0
   1   0  17 4016.90 646.211   3
   1   0  18 78.2165 592.251   3
   1   0  18 12.5546 406.881   0
   1   0  19 1529.29 431.606   0
   1   0  19 854.493 606.521   3
   1   0  20 85.8402 415.124   0
   1   0  20-218.832 578.049   3
   1   0  21 3928.78 662.096   3
   1   0  22-55.0725 612.762   3
   1   0  23 381.326 707.904   3
   1   0  24 133.995 737.518   3
   1   0  25 9407.34 900.264   3
   1   0  26 296.733 662.644   3
   1   0  27 813.292 798.710   3
  -1   1  28 341.561 725.321   3
  -1  -1  28 390.063 664.594   3
  -1   1  27-331.060 642.615   3
  -1  -1  27-7.63192 733.730   3
  -1  -1  26 1871.52 693.966   3
  -1   1  26 1860.21 716.731   3
  -1   1  25 2513.90 644.176   0
  -1   1  25 3282.48 686.642   3
  -1  -1  25 2874.36 689.215   3
  -1  -1  25 2208.61 650.698   0
  -1   1  24 1286.82 602.085   3
  -1   1  24 1217.46 615.291   0
  -1  -1  24 1241.74 630.888   0
  -1  -1  24 1313.54 666.245   3
  -1  -1  23 423.063 589.272   3
  -1   1  23 676.277 623.704   3
  -1   1  23 285.640 599.868   0
  -1  -1  23 641.368 562.260   0
  -1  -1  22 1533.07 658.386   3
  -1   1  22 1804.84 591.933   0
  -1   1  22 2036.29 598.147   3
  -1  -1  22 1557.92 605.290   0
  -1   1  21 10531.8 760.857   3
  -1  -1  21 9794.53 733.044   0
  -1  -1  21 10927.8 751.802   3
  -1   1  21 9804.50 722.962   0
  -1   1  20 690.645 609.551   0
  -1  -1  20 1322.61 582.410   3
  -1   1  20 1400.13 548.220   3
  -1  -1  20 1173.59 549.408   0
  -1  -1  19 1053.42 575.153   3
  -1   1  19 1246.71 551.765   0
  -1   1  19 827.240 521.752   3
  -1  -1  19 1557.12 594.529   0
  -1  -1  18 837.605 521.053   3
  -1  -1  18 1430.22 543.323   0
  -1   1  18 1034.73 584.984   0
  -1   1  18 1120.61 536.020   3
  -1   1  17 24131.4 819.030   3
  -1  -1  17 24107.0 836.471   0
  -1   1  17 24592.4 859.490   0
  -1  -1  17 26327.9 874.152   3
  -1   1  16 17799.5 719.385   3
  -1  -1  16 19999.6 776.348   3
  -1   1  16 17651.2 759.444   0
  -1  -1  16 18736.8 793.964   0
  -1   1  15 57205.1 1110.22   0
  -1  -1  15 55955.0 1064.57   3
  -1  -1  15 55956.8 1097.52   0
  -1   1  15 56169.5 1047.63   3
  -1  -1  14-46.7007 512.401   0
  -1  -1  14 555.806 451.999   3
  -1   1  14 448.202 422.373   3
  -1   1  14 165.274 488.504   0
  -1   1  13 31962.1 754.382   3
  -1   1  13 31809.6 840.389   0
  -1  -1  13 31258.8 804.529   0
  -1  -1  13 32114.6 770.729   3
  -1  -1  12 9320.73 497.707   3
  -1   1  12 8671.91 542.835   0
  -1   1  12 10262.2 500.228   3
  -1  -1  12 9336.40 548.102   0
  -1  -1  11 150568. 1390.53   0
  -1  -1  11 149663. 1338.18   3
  -1   1  11 150423. 1298.36   3
   1   1 -10 815.061 199.573   1
  -1   1  10 789.706 318.043   3
  -1  -1  10 729.592 418.519   0
  -1  -1  10 804.766 339.572   3
  -1   1   9 1585.74 303.908   3
  -1  -1   9 1229.53 409.923   0
   1   1  -9 1463.09 198.060   1
  -1  -1   9 1707.84 324.351   3
  -1  -1   8 71006.5 792.501   3
  -1   1   8 70177.1 749.297   3
   1   1  -8 70683.8 578.485   1
  -1  -1   8 71431.8 848.639   0
   1   1  -7 36940.0 437.189   1
  -1  -1   7 36993.2 637.857   0
   1   1  -7 35597.3 536.200   3
  -1   1   7 36920.2 435.204   1
   1  -1  -7 36878.6 519.124   3
  -1  -1   7 37878.5 585.298   3
  -1   1   7 36719.8 540.535   3
  -1   1   6 3222.00 204.271   1
   1  -1  -6 3617.34 227.457   3
  -1  -1   6 3741.77 380.635   0
  -1  -1   6 4077.30 332.873   3
   1   1  -6 3712.11 253.335   1
   1  -1  -6 4004.25 271.795   1
   1   1  -6 3939.01 255.013   3
  -1   1   6 3706.32 293.524   3
   1  -1  -5 106798. 680.831   3
  -1   1   5 108389. 680.438   1
   1   1  -5 109756. 684.539   1
   1   1  -5 109165. 746.240   3
   1  -1  -5 109449. 698.726   1
  -1   1   5 108770. 685.808   3
  -1  -1   5 108499. 759.526   3
  -1  -1   5 109138. 872.506   0
  -1  -1   4 686.590 201.335   3
  -1   1   4 654.109 169.311   3
  -1   1   4 452.334 172.202   1
   1   1  -4 771.406 161.747   3
   1  -1  -4 623.772 214.625   1
  -1  -1   4 491.042 281.885   0
   1  -1  -4 621.717 139.576   3
  -1   1   3 73121.9 1498.28   3
   1  -1  -3 136219. 2052.09   3
  -1  -1  -3 178253. 929.629   3
   1  -1   3 176604. 896.029   3
   1   1   3 176217. 922.059   3
  -1   1  -3 174565. 886.665   3
   1  -1   4 82782.4 698.382   3
   1   1   4 81826.6 721.025   3
  -1  -1  -4 82521.1 710.897   3
  -1   1  -4 80974.7 685.858   3
   1  -1   4 84601.2 399.853   0
   1   1   5 22937.4 491.751   3
   1  -1   5 22896.5 477.919   3
   1  -1   5 22811.3 281.475   0
  -1   1  -5 22712.6 452.842   3
  -1  -1  -5 22548.7 453.219   3
   1  -1   6 55388.6 725.278   3
   1   1   6 55453.7 740.500   3
   1  -1   6 56422.9 473.606   0
   1  -1   7 255144. 1516.56   3
   1  -1   7 255621. 4204.19   0
   1   1   7 253033. 1521.82   3
   1   1   8 309094. 1765.32   3
   1  -1   8 311473. 1773.83   3
   1  -1   8 310300. 5104.84   0
   1   1   9 139220. 1275.54   3
   1  -1   9 136181. 951.381   0
   1  -1   9 137238. 1273.44   3
   1  -1  10 7500.87 340.450   0
   1  -1  10 7249.85 472.176   3
   1   1  10 7162.81 466.443   3
   1  -1  11 38462.6 822.974   3
   1  -1  11 37535.2 618.969   0
   1   1  11 36456.4 620.294   0
   1   1  11 39219.7 824.828   3
   1  -1  12 221.019 433.691   3
   1   1  12 490.717 310.600   0
   1  -1  12 364.134 318.317   0
   1   1  12 653.546 469.079   3
   1   1  13 91320.4 1011.40   0
   1   1  13 92483.9 1280.11   3
   1  -1  13 90635.1 1001.65   0
   1  -1  13 90224.1 1272.26   3
   1  -1  14 621.507 494.737   3
   1   1  14 875.937 502.336   3
   1   1  14 863.303 374.100   0
   1  -1  14 844.956 369.677   0
   1   1  15 5614.27 457.094   0
   1  -1  15 5845.76 600.356   3
   1   1  15 6392.07 653.055   3
   1  -1  15 5494.79 453.624   0
   1  -1  16 13019.9 720.761   3
   1   1  16 12126.8 552.873   0
   1  -1  16 12018.1 554.305   0
   1   1  16 13025.4 751.817   3
   1  -1  17 20881.1 870.075   3
   1   1  17 18907.6 827.279   3
   1  -1  17 21483.8 660.754   0
   1   1  17 20187.2 657.456   0
   1   1  18 2583.80 438.731   0
   1  -1  18 3125.20 450.777   0
   1   1  18 2651.34 574.422   3
   1  -1  18 2750.13 661.681   3
   1   1  19 5763.26 516.941   0
   1  -1  19 5261.14 725.366   3
   1   1  19 6592.41 679.046   3
   1  -1  19 5515.66 510.694   0
   1   1  20 301.026 579.267   3
   1  -1  20 587.200 429.405   0
   1  -1  20 180.691 615.702   3
   1   1  20 403.640 441.607   0
   1   1  21 2822.46 491.766   0
   1  -1  21 3549.76 657.063   3
   1   1  21 1851.69 612.483   3
   1   1  22 5869.61 731.860   3
   1  -1  22 5946.45 748.447   3
   1  -1  23 990.960 726.310   3
   1   1  23 1098.33 693.175   3
   1  -1  24-321.219 725.782   3
   1   1  24 432.834 729.351   3
   1  -1  25 571.479 672.306   3
   1   1  25 456.788 758.832   3
   1   1  26 949.774 736.807   3
   1  -1  26 1371.41 780.294   3
   1  -1  27 3135.63 832.255   3
   1   1  27 2832.64 753.194   3
  -1   2  28 2068.27 767.039   3
  -1  -2  27 211.843 729.704   3
  -1   2  27 298.181 639.168   3
  -1  -2  26 41.2319 641.079   3
  -1   2  26 652.510 651.395   3
  -1   2  25 221.026 598.646   0
  -1   2  25 232.333 646.127   3
  -1  -2  25 523.292 697.061   3
  -1  -2  24 1885.28 706.041   3
  -1   2  24 1874.14 627.002   0
  -1   2  24 2956.60 637.870   3
  -1  -2  23 3410.55 680.035   3
  -1  -2  23 3940.16 666.721   0
  -1   2  23 3750.02 639.545   0
  -1   2  23 3564.89 673.430   3
  -1  -2  22 7472.70 703.117   0
  -1   2  22 9569.67 765.552   3
  -1   2  22 8609.49 759.608   0
  -1  -2  22 9146.88 785.740   3
  -1  -2  21 635.307 545.756   0
  -1  -2  21 891.915 606.768   3
  -1   2  21 63.1566 538.453   3
  -1   2  21 751.335 597.977   0
  -1  -2  20 1909.24 574.217   3
  -1   2  20 2024.64 552.206   3
  -1  -2  20 2799.54 633.094   0
  -1   2  20 1674.94 593.325   0
  -1  -2  19 1090.89 578.378   3
  -1  -2  19 963.042 572.170   0
  -1   2  19 1471.51 561.495   3
  -1   2  19 396.015 563.963   0
  -1  -2  18 27688.9 934.566   3
  -1  -2  18 25173.3 866.577   0
  -1   2  18 25370.8 913.077   0
  -1   2  18 27191.3 887.789   3
  -1   2  17 3766.64 531.193   3
  -1  -2  17 4418.47 612.838   3
  -1   2  17 4052.88 600.475   0
  -1  -2  17 4071.40 575.153   0
  -1  -2  16 7564.25 598.136   3
  -1   2  16 7317.75 631.905   0
  -1  -2  16 7291.13 619.212   0
  -1   2  16 7692.93 585.062   3
  -1  -2  15 4103.20 566.634   0
  -1   2  15 4571.35 523.315   3
  -1  -2  15 4297.90 542.015   3
  -1   2  15 4851.06 609.146   0
  -1  -2  14 30943.0 819.572   3
  -1   2  14 32088.7 786.094   3
  -1   2  14 31050.5 873.700   0
  -1  -2  14 31902.1 839.127   0
  -1  -2  13 73022.2 1085.96   3
  -1  -2  13 67865.8 1076.24   0
  -1   2  13 69341.8 1023.10   3
  -1  -2  12 6815.86 541.512   0
  -1   2  12 7317.65 460.906   3
  -1  -2  12 7194.38 503.216   3
   1   2 -12 7251.53 259.663   1
  -1  -2  11 5255.21 436.780   3
  -1   2  11 5611.33 416.100   3
   1   2 -11 5393.73 244.107   1
  -1  -2  11 5144.31 515.132   0
   1   2 -10 85196.0 655.710   1
  -1  -2  10 84904.3 995.607   3
  -1   2  10 84586.4 930.095   3
  -1   2  10 82582.3 689.897   1
  -1  -2  10 86259.9 1037.21   0
  -1   2   9 701.197 278.595   3
  -1   2   9 709.255 183.679   1
  -1  -2   9 473.374 366.208   0
  -1  -2   9 576.068 332.559   3
   1   2  -9 479.898 180.417   1
   1   2  -8 40442.3 458.613   1
  -1  -2   8 39929.3 643.069   3
  -1   2   8 39444.4 476.284   1
  -1   2   8 40234.3 593.027   3
  -1  -2   8 41771.5 701.757   0
  -1   2   7 15616.5 326.031   1
  -1   2   7 15416.1 390.128   3
  -1  -2   7 16707.3 469.973   0
  -1  -2   7 15546.7 441.655   3
   1  -2  -7 14942.6 356.036   3
  -1   2   6 39055.3 502.956   3
  -1   2   6 38272.4 461.287   1
   1   2  -6 38161.4 534.362   3
  -1  -2   6 38042.7 625.932   0
   1  -2  -6 38059.5 468.453   3
  -1  -2   6 37442.2 569.712   3
   1  -2  -5 395123. 4995.99   3
  -1   2   5 394394. 4910.80   3
  -1  -2   5 395433. 5747.75   3
  -1   2   5 402750. 5350.24   1
   1   2  -5 405090. 1612.05   0
  -1  -2   5 398400. 6278.28   0
   1   2  -5 403254. 1491.82   3
  -1   2   4 682853. 5520.09   3
  -1   2   4 705245. 6862.07   1
   1   2  -4 700867. 7098.96   3
  -1  -2   4 690403. 6992.42   3
   1  -2  -4 706122. 5647.04   3
   1   2  -4 707350. 7769.31   0
  -1  -2   4 703346. 7745.70   0
   1   2  -3 15416.8 278.525   3
  -1   2   3 15785.2 293.254   1
  -1   2   3 12037.9 175.018   3
  -1  -2   3 12503.4 273.459   3
   1  -2  -3 16031.0 185.631   3
  -1   2  -3 19455.1 335.358   3
  -1  -2  -3 19922.8 378.159   3
   1  -2   3 19145.6 346.014   3
  -1   2  -3 19368.6 249.595   1
   1   2   3 21252.2 391.403   3
   1  -2   4 16216.3 381.052   3
  -1   2  -4 15298.3 227.288   1
   1   2   4 15964.9 422.220   3
  -1   2  -4 15818.8 230.321   0
  -1   2  -4 16082.3 369.693   3
  -1  -2  -4 16110.4 384.858   3
   1   2   5 105825. 903.493   3
  -1   2  -5 104826. 464.114   1
   1  -2   5 105960. 885.111   3
  -1   2  -5 107000. 870.526   3
  -1  -2  -5 106480. 885.590   3
  -1   2  -5 108479. 585.827   0
  -1   2  -6 127378. 462.009   1
   1   2   6 132160. 1075.12   3
   1  -2   6 133339. 714.843   0
   1  -2   6 133360. 1071.68   3
   1  -2   7 27068.0 404.854   0
   1  -2   7 26835.9 601.838   3
   1   2   7 26717.2 593.618   3
   1  -2   8 29140.7 461.292   0
   1  -2   8 28794.3 628.850   3
   1   2   8 28100.4 646.255   3
   1   2   9 114351. 1175.82   3
   1  -2   9 114016. 884.751   0
   1  -2   9 117080. 1195.18   3
   1  -2  10 34283.7 759.510   3
   1   2  10 33330.9 730.652   3
   1  -2  10 33580.7 551.920   0
   1  -2  11 196825. 1291.14   0
   1   2  11 194735. 1644.38   3
   1  -2  11 196380. 1676.44   3
   1  -2  12 8292.46 587.585   3
   1  -2  12 7735.66 419.925   0
   1   2  12 7424.92 535.279   3
   1  -2  13 258.223 468.893   3
   1   2  13 512.388 495.325   3
   1  -2  13 430.530 336.339   0
   1  -2  14 23226.2 803.441   3
   1  -2  14 23030.8 610.617   0
   1   2  14 21787.9 760.387   3
   1   2  14 23491.5 634.745   0
   1  -2  15 3621.76 617.616   3
   1   2  15 3272.66 418.774   0
   1   2  15 3535.97 586.142   3
   1  -2  15 3803.27 443.299   0
   1  -2  16 7368.33 687.201   3
   1   2  16 6457.74 485.341   0
   1  -2  16 7403.96 492.586   0
   1   2  16 6928.50 627.956   3
   1  -2  17 2851.45 586.856   3
   1   2  17 2744.08 439.831   0
   1   2  17 3230.03 598.604   3
   1  -2  17 2806.15 436.089   0
   1  -2  18 3571.55 627.105   3
   1   2  18 3011.00 640.974   3
   1  -2  18 3571.45 464.238   0
   1   2  18 3398.42 462.341   0
   1  -2  19 8284.59 541.949   0
   1   2  19 8383.55 558.930   0
   1  -2  19 9370.62 793.243   3
   1   2  19 8690.26 751.658   3
   1   2  20 16449.0 685.906   0
   1  -2  20 16889.4 922.812   3
   1   2  20 17112.2 906.309   3
   1  -2  21 5673.75 708.505   3
   1   2  21 6253.29 558.867   0
   1   2  21 6208.65 745.935   3
   1   2  22 316.029 643.849   3
   1  -2  22 771.392 695.614   3
   1   2  23 338.637 666.708   3
   1  -2  23 165.641 694.444   3
   1   2  24 1980.11 735.356   3
   1  -2  24 2483.65 699.960   3
   1  -2  25 2235.45 794.683   3
   1   2  25 2148.53 777.157   3
   1  -2  26 4076.08 837.114   3
   1   2  26 4527.46 876.052   3
   1   2  27 887.123 762.003   3
  -1   3  28 258.547 742.807   3
  -1  -3  27 333.276 667.526   3
  -1   3  27 290.462 646.715   3
  -1   3  26 3819.53 707.113   3
  -1  -3  26 3302.59 715.425   3
  -1  -3  25 340.532 695.537   3
  -1   3  25 706.653 667.862   3
  -1   3  25 258.090 612.125   0
  -1  -3  24 2999.06 724.530   3
  -1   3  24 3182.48 675.661   3
  -1   3  24 3093.87 658.966   0
  -1   3  23 458.061 568.066   0
  -1   3  23 372.414 583.278   3
  -1  -3  23-10.6374 596.927   3
  -1  -3  22 3365.95 638.741   0
  -1  -3  22 4355.63 706.474   3
  -1   3  22 3779.70 629.149   0
  -1   3  22 4063.97 625.945   3
  -1   3  21 95.0439 556.217   3
  -1  -3  21 569.830 597.617   0
  -1   3  21 434.786 587.563   0
  -1  -3  21 1443.27 636.958   3
  -1   3  20 35052.9 1045.80   3
  -1  -3  20 37239.5 1110.82   3
  -1  -3  20 34434.3 1026.10   0
  -1   3  20 34878.7 1070.20   0
  -1   3  19 1593.22 620.966   0
  -1   3  19 1969.61 564.833   3
  -1  -3  19 1909.28 573.438   3
  -1  -3  19 1699.80 550.579   0
  -1  -3  18 898.771 542.986   3
  -1  -3  18 787.580 531.210   0
  -1   3  18 94.6073 568.949   0
  -1   3  18 599.874 528.497   3
  -1   3  17 1784.41 504.396   3
  -1   3  17 2047.59 543.615   0
  -1  -3  17 2077.84 536.083   3
  -1  -3  17 1828.81 538.351   0
  -1   3  16 27604.2 818.990   3
  -1  -3  16 27065.7 850.779   0
  -1   3  16 26399.7 860.187   0
  -1  -3  16 27239.5 845.402   3
  -1  -3  15 679.815 488.787   3
  -1  -3  15 1008.97 562.530   0
  -1   3  15 1363.99 479.374   3
  -1  -3  14 18316.6 698.493   3
  -1   3  14 17872.9 659.383   3
  -1  -3  14 17478.3 726.954   0
  -1  -3  13 27673.3 780.342   0
   1   3 -13 29832.3 413.210   1
  -1  -3  13 30127.2 794.032   3
  -1   3  13 29250.5 722.888   3
  -1  -3  12 46097.5 872.490   3
  -1   3  12 46086.1 814.815   3
  -1  -3  12 46646.2 906.669   0
  -1   3  12 44347.4 551.578   1
   1   3 -12 46534.7 508.551   1
  -1   3  11 29490.5 647.255   3
  -1   3  11 29702.9 462.817   1
  -1  -3  11 29813.7 708.985   3
   1   3 -11 31163.9 429.302   1
  -1  -3  11 30103.7 723.927   0
   1   3 -10 25794.8 405.651   1
  -1   3  10 25970.8 571.954   3
  -1  -3  10 26673.8 653.564   3
  -1  -3  10 25023.9 653.476   0
  -1   3  10 25391.3 432.850   1
  -1  -3   9 19325.8 560.479   0
  -1  -3   9 19980.9 535.974   3
  -1   3   9 19710.6 479.666   3
  -1   3   9 19402.0 383.844   1
  -1   3   8 21457.2 390.834   1
  -1   3   8 21537.6 458.476   3
  -1  -3   8 22130.7 575.690   0
  -1  -3   8 22526.9 540.464   3
  -1   3   7 4293.30 238.735   1
   1  -3  -7 4081.58 231.522   3
  -1   3   7 4353.70 283.033   3
  -1  -3   7 4428.18 374.633   0
  -1  -3   7 4352.06 345.176   3
  -1   3   6 210107. 1052.54   1
   1  -3  -6 210247. 1034.23   3
   1   3  -6 209656. 1222.77   3
  -1  -3   6 212133. 1291.99   0
  -1  -3   6 210000. 1233.60   3
  -1   3   6 206325. 1030.55   3
  -1   3   5 10603.3 300.064   1
  -1  -3   5 11499.0 440.247   0
  -1   3   5 11067.2 305.256   3
  -1  -3   5 11161.7 387.577   3
   1   3  -5 10897.5 393.530   0
   1   3  -5 10923.9 328.299   3
   1  -3  -5 10906.1 260.283   3
   1   3  -4 496744. 6416.63   3
   1  -3  -4 500947. 4775.82   3
  -1  -3   4 482585. 6639.61   0
  -1  -3   4 490900. 6290.91   3
  -1   3   4 485090. 4722.97   3
   1   3  -4 500741. 6746.63   0
  -1   3   4 477534. 6001.76   1
   1   3  -3 34013.2 483.866   0
  -1   3   3 34850.5 282.279   3
   1   3  -3 34393.3 429.242   3
   1  -3  -3 35498.1 274.440   3
  -1  -3   3 35045.9 447.748   3
  -1  -3   2 199136. 3540.43   3
   1  -3   2 192238. 3360.02   3
  -1  -3  -3 21883.9 384.870   3
   1  -3   3 22737.6 388.071   3
   1   3   3 23315.4 419.305   3
  -1   3  -3 21887.3 362.784   3
   1   3   4 497344. 7029.93   3
   1  -3   4 485081. 6653.00   3
  -1   3  -4 476217. 6593.44   3
  -1  -3  -4 487838. 7003.83   3
   1  -3   5 50116.8 661.322   3
  -1  -3  -5 51213.1 643.332   3
   1   3   5 50934.9 704.080   3
  -1   3  -5 49820.7 636.362   3
  -1   3  -5 52018.0 463.194   0
   1   3   6 53405.5 758.559   3
   1  -3   6 53049.0 727.912   3
  -1   3  -6 54403.8 366.545   1
  -1   3  -6 53877.8 511.027   0
  -1   3  -7 2240.07 215.303   0
   1  -3   7 2327.15 340.360   3
   1   3   7 1985.21 377.594   3
  -1   3  -7 2138.75 103.671   1
   1  -3   8 133951. 1212.21   3
   1   3   8 132543. 1209.79   3
   1   3   9 38645.9 748.516   3
   1  -3   9 38457.1 753.796   3
   1  -3  10 1043.54 281.428   0
   1   3  10 1136.08 385.999   3
   1  -3  10 1400.27 427.682   3
   1  -3  11 1338.93 457.792   3
   1   3  11 1577.23 444.322   3
   1  -3  11 1276.94 325.815   0
   1  -3  12 30163.7 815.077   3
   1   3  12 30889.8 800.863   3
   1  -3  12 30309.2 600.281   0
   1   3  12 27324.3 251.200   1
   1  -3  13 2048.26 373.078   0
   1  -3  13 1998.48 496.255   3
   1   3  13 1890.16 494.648   3
   1  -3  14 5746.66 621.227   3
   1   3  14 5964.91 569.210   3
   1  -3  14 6691.40 461.492   0
   1   3  15 685.485 544.858   3
   1  -3  15 1002.48 529.711   3
   1  -3  15 741.066 392.513   0
   1  -3  16 9071.07 702.588   3
   1   3  16 9492.36 533.436   0
   1   3  16 9633.08 671.400   3
   1  -3  17 702.569 614.698   3
   1   3  17 737.704 582.974   3
   1   3  17 241.041 414.234   0
   1   3  18 13164.8 755.418   3
   1  -3  18 12272.2 766.354   3
   1   3  18 12315.5 607.004   0
   1   3  19 963.593 602.516   3
   1  -3  19 488.261 653.266   3
   1   3  19 432.795 446.887   0
   1   3  20 2696.49 482.239   0
   1  -3  20 4427.57 736.342   3
   1   3  20 3219.54 691.134   3
   1   3  21 748.184 650.920   3
   1   3  21 832.475 468.812   0
   1  -3  21 893.645 613.902   3
   1  -3  22 14671.3 961.176   3
   1   3  22 14297.9 908.913   3
   1   3  23 214.159 682.726   3
   1  -3  23 510.137 636.437   3
   1  -3  24 1197.09 741.532   3
   1   3  24 699.713 692.344   3
   1   3  25 264.938 741.421   3
   1  -3  25 331.434 752.182   3
   1   3  26 2368.01 828.499   3
   1  -3  26 3104.74 757.797   3
   1   3  27 1026.07 802.215   3
  -1   4  28 2799.49 780.326   3
  -1   4  27 1053.89 687.999   3
  -1  -4  27 1078.53 717.348   3
  -1   4  26 851.815 628.004   3
  -1  -4  26 850.478 737.152   3
  -1   4  25 42.1068 632.209   0
  -1   4  25-22.3300 620.703   3
  -1  -4  25 659.748 698.260   3
  -1   4  24 7385.18 769.113   0
  -1   4  24 7947.24 787.645   3
  -1  -4  24 8570.66 789.239   3
  -1   4  23 997.678 626.466   3
  -1  -4  23 727.376 595.275   3
  -1   4  23 1085.89 605.138   0
  -1   4  22 8269.40 730.516   3
  -1  -4  22 7862.03 783.893   3
  -1   4  22 7409.59 709.168   0
  -1  -4  21 197.318 622.740   3
  -1   4  21 628.891 546.678   3
  -1   4  21 368.735 553.231   0
  -1   4  20 268.725 559.248   0
  -1   4  20 487.842 532.258   3
  -1  -4  20 916.770 626.717   3
  -1  -4  19 3099.32 631.596   3
  -1   4  19 2566.06 564.010   3
  -1   4  19 2235.22 589.675   0
  -1  -4  19 2949.42 578.678   0
  -1  -4  18 34522.5 970.835   0
  -1   4  18 36306.2 1019.87   0
  -1  -4  18 37489.3 1046.30   3
  -1   4  18 35847.0 975.609   3
  -1  -4  17 685.782 532.825   0
  -1   4  17 206.995 486.496   3
  -1  -4  17-124.058 536.361   3
  -1  -4  16 579.128 563.979   0
  -1  -4  16 450.133 544.385   3
  -1   4  16 572.030 446.599   3
  -1   4  15 9397.97 566.953   3
  -1  -4  15 8980.38 640.295   3
  -1  -4  15 8710.82 636.882   0
  -1   4  14 6156.10 511.806   3
  -1  -4  14 5798.48 583.336   0
   1   4 -14 5682.64 236.542   1
  -1  -4  14 5508.31 550.532   3
  -1   4  14 4700.76 274.182   1
  -1  -4  13 22096.2 735.404   3
  -1   4  13 21135.6 648.976   3
  -1  -4  13 22183.8 727.896   0
   1   4 -13 21898.5 384.532   1
  -1   4  13 20425.0 430.941   1
  -1  -4  12 22991.5 727.558   0
  -1   4  12 20083.2 424.997   1
  -1  -4  12 22016.7 689.345   3
   1   4 -12 21702.4 388.589   1
  -1   4  12 21447.6 605.690   3
  -1  -4  11 4281.99 440.478   3
  -1   4  11 3821.09 377.224   3
  -1  -4  11 3778.31 508.093   0
  -1   4  11 3892.50 252.812   1
   1   4 -11 4078.71 247.340   1
  -1  -4  10 61425.6 897.815   3
  -1   4  10 58321.6 654.175   1
  -1   4  10 59917.3 794.696   3
  -1  -4  10 62222.5 931.562   0
  -1  -4   9 7469.95 457.196   0
  -1   4   9 7287.11 296.410   1
  -1   4   9 7628.39 358.610   3
  -1  -4   9 7858.66 441.081   3
  -1  -4   8 73610.6 889.675   0
  -1   4   8 72343.8 752.975   3
  -1  -4   8 73942.2 889.783   3
  -1   4   8 72277.5 695.922   1
  -1  -4   7 42288.6 674.659   0
   1  -4  -7 41130.9 532.015   3
  -1   4   7 40547.6 525.807   1
  -1   4   7 41212.2 546.442   3
  -1  -4   7 41305.9 657.973   3
   1  -4  -6 37864.2 469.053   3
  -1  -4   6 38322.9 620.427   3
  -1  -4   6 37806.6 620.446   0
  -1   4   6 37761.2 492.877   3
   1   4  -5 111454. 888.449   3
  -1   4   5 109873. 706.794   3
   1   4  -5 109012. 921.526   0
  -1  -4   5 110793. 913.375   3
   1  -4  -5 109112. 687.394   3
  -1  -4   4 236454. 1210.00   3
   1   4  -4 237404. 1255.62   0
   1  -4  -4 242451. 3487.40   3
  -1   4   4 238854. 3475.19   3
   1   4  -4 236271. 1210.41   3
   1   4  -3 12251.6 332.124   3
   1   4  -3 11979.6 366.892   0
  -1  -4   3 11846.6 336.536   3
   1  -4  -3 12307.7 202.160   3
  -1   4   2 180066. 990.644   2
  -1  -4   2 178341. 945.718   3
  -1   4   1 2266.46 202.926   2
   1  -4  -1 2135.12 112.101   3
   1  -4  -1 2361.11 198.194   2
   1  -4   0 524887. 4488.34   3
   1  -4   0 532615. 6099.76   2
  -1   4   0 519395. 4530.41   3
  -1   4   0 533794. 6134.30   2
   1  -4   1 7709.26 213.349   3
  -1   4  -1 7320.16 205.634   3
   1  -4   2 135796. 768.393   3
  -1  -4  -2 133730. 868.964   3
  -1   4  -2 135103. 769.190   3
   1  -4   3 31447.9 460.474   3
   1   4   3 30791.6 513.970   3
  -1   4  -3 29900.7 440.882   3
  -1  -4  -3 29982.4 470.497   3
  -1  -4  -4 2158.11 216.514   3
  -1   4  -4 2111.08 265.662   3
   1  -4   4 2218.25 327.824   3
   1   4   4 2424.31 364.043   3
   1  -4   5 56031.5 720.618   3
   1   4   5 57370.2 743.043   3
   1   4   6 277921. 1566.15   3
  -1   4  -6 277243. 1153.11   0
   1  -4   6 276137. 1534.94   3
   1  -4   7 15386.4 524.152   3
  -1   4  -7 15061.9 343.371   0
   1   4   7 15303.2 532.583   3
  -1   4  -8 9554.18 317.666   0
   1  -4   8 9902.67 488.561   3
  -1   4  -8 10228.3 177.724   1
   1   4   8 9802.21 492.686   3
  -1   4  -9 27803.5 232.494   1
   1  -4   9 29924.7 705.345   3
   1   4   9 29930.5 676.631   3
   1   4  10 105316. 1193.99   3
   1  -4  10 107390. 1234.77   3
   1  -4  11 34547.4 808.103   3
   1   4  11 32507.7 778.828   3
   1   4  12 16348.2 652.468   3
   1  -4  12 16006.6 679.763   3
   1  -4  13 14034.0 709.604   3
   1   4  13 12870.1 631.965   3
   1   4  14 14322.4 683.276   3
   1  -4  14 14190.7 700.694   3
   1   4  15 13185.5 709.885   3
   1  -4  15 13333.4 760.558   3
   1  -4  16 19031.9 812.243   3
   1   4  16 19898.3 828.386   3
   1   4  17 5236.32 478.114   0
   1  -4  17 5978.34 711.993   3
   1   4  17 5121.71 617.166   3
   1   4  18 10002.9 583.018   0
   1   4  18 11105.7 769.755   3
   1  -4  18 10315.4 736.288   3
   1   4  19 1093.60 458.835   0
   1   4  19 1268.61 616.756   3
   1  -4  19 1454.42 681.737   3
   1   4  20 22473.2 930.764   3
   1  -4  20 20761.3 955.851   3
   1   4  20 20532.4 739.828   0
   1   4  21 594.144 622.131   3
   1   4  21 652.974 472.631   0
   1  -4  21 715.223 687.128   3
   1   4  22 2888.24 735.153   3
   1  -4  22 3398.36 752.087   3
   1  -4  23 577.145 677.077   3
   1   4  23 999.451 696.239   3
   1   4  24 7081.97 844.306   3
   1  -4  24 6857.48 895.902   3
   1  -4  25 456.631 658.251   3
   1   4  25 5.58529 715.288   3
   1   4  26 674.468 746.893   3
   1  -4  26 822.842 802.758   3
   1   4  27 110.523 753.794   3
  -1   5  28 186.042 689.842   3
  -1   5  27 255.201 679.589   3
  -1  -5  27 641.279 774.864   3
  -1  -5  26 1270.71 713.678   3
  -1   5  26 883.908 627.010   3
  -1   5  25 1079.05 649.750   0
  -1   5  25 1503.36 635.080   3
  -1  -5  25 1515.05 672.264   3
  -1   5  24 1795.86 629.924   3
  -1  -5  24 2282.73 695.556   3
  -1   5  24 1623.10 665.573   0
  -1   5  23 526.542 565.191   3
  -1   5  23 457.029 637.680   0
  -1  -5  23 655.435 671.505   3
  -1   5  22 706.276 617.881   0
  -1   5  22 858.407 560.169   3
  -1  -5  22 1349.12 684.666   3
  -1   5  21 2988.97 581.626   3
  -1   5  21 2433.85 649.179   0
  -1  -5  21 2833.09 685.792   3
  -1   5  20 11979.4 801.597   0
  -1   5  20 12059.7 730.599   3
  -1  -5  20 11411.4 802.527   3
  -1   5  19 8464.24 740.361   0
  -1   5  19 8720.37 656.945   3
  -1  -5  19 9396.78 753.254   3
  -1  -5  18 706.943 593.404   3
  -1   5  18 1097.08 525.513   3
  -1   5  17 20464.3 754.420   3
  -1  -5  17 20228.2 846.614   3
  -1   5  16 445.721 452.723   3
  -1  -5  16-7.23764 534.704   0
  -1  -5  16 179.783 539.451   3
  -1  -5  15 12035.0 668.593   3
   1   5 -15 12740.1 296.111   1
  -1   5  15 12655.0 608.293   3
  -1  -5  15 12903.6 691.496   0
  -1   5  14 693.721 427.268   3
   1   5 -14 872.382 199.155   1
  -1  -5  14 560.539 515.646   3
  -1  -5  14 1099.07 499.955   0
  -1  -5  13 5131.68 576.563   0
  -1  -5  13 4944.04 529.129   3
  -1   5  13 4865.40 458.928   3
   1   5 -13 4946.62 266.450   1
   1   5 -12 68984.8 659.258   1
  -1   5  12 68337.7 954.643   3
  -1  -5  12 69954.0 1073.04   0
  -1  -5  12 68812.0 1071.53   3
  -1  -5  11 26958.4 705.380   3
  -1  -5  11 25902.0 705.301   0
  -1   5  11 25885.9 608.745   3
  -1  -5  10 1031.00 443.332   0
  -1  -5  10 910.842 394.882   3
  -1   5  10 1140.16 310.057   3
  -1   5   9 90910.9 904.774   3
  -1  -5   9 88894.5 1046.90   3
  -1   5   8 2854.27 279.541   3
  -1  -5   8 2953.54 360.201   3
  -1  -5   7 96002.4 969.821   3
   1  -5  -7 95611.8 803.680   3
  -1   5   7 95558.3 811.111   3
  -1  -5   6 18751.2 522.135   3
   1  -5  -6 19289.0 362.598   3
  -1   5   6 18182.5 386.549   3
  -1  -5   5 29766.0 573.825   3
   1  -5  -5 29249.6 395.059   3
  -1   5   5 28989.9 420.129   3
   1  -5  -4 266253. 993.497   3
   1   5  -4 266190. 1357.87   0
   1   5  -4 268010. 1358.36   3
  -1  -5   4 268496. 1358.50   3
   1  -5  -3 284984. 3689.20   3
  -1   5   3 289742. 1385.23   2
   1   5  -3 287244. 1341.23   3
  -1  -5   3 286288. 5203.00   3
  -1   5   2 39526.6 537.136   2
  -1  -5   2 40155.3 544.779   3
  -1   5   1 41199.5 501.543   2
   1  -5  -1 43584.2 363.212   3
   1  -5  -1 42644.9 516.001   2
   1  -5   0 60624.4 459.770   3
   1  -5   0 60486.5 588.723   2
  -1   5   0 58431.7 453.845   3
  -1   5   0 58512.7 574.394   2
  -1   5  -1 266207. 4058.68   3
   1  -5   1 268287. 4069.29   3
  -1   5  -2 79626.5 635.295   3
   1  -5   2 81935.6 648.510   3
  -1  -5  -3 3778.60 264.714   3
  -1   5  -3 3746.30 258.781   3
   1  -5   3 4168.86 309.523   3
   1   5   4 184941. 1205.15   3
   1  -5   4 181343. 1119.53   3
  -1  -5  -4 177946. 1161.77   3
  -1   5  -4 176553. 1101.40   3
   1   5   5 115992. 1034.67   3
   1  -5   5 115411. 984.638   3
   1  -5   6 44148.3 691.603   3
   1   5   6 45792.6 734.493   3
  -1   5  -6 43800.9 518.939   0
   1  -5   7 221647. 1509.40   3
  -1   5  -7 226861. 1166.74   0
   1   5   7 225443. 1521.37   3
   1  -5   8 110125. 1143.96   3
  -1   5  -8 111072. 878.908   0
   1   5   8 110619. 1146.54   3
   1  -5   9 8167.06 488.621   3
   1   5   9 8311.24 486.592   3
   1  -5  10 1278.97 447.284   3
  -1   5 -10 1332.55 97.9319   1
   1   5  10 1358.71 422.268   3
   1   5  11 35652.1 835.045   3
   1  -5  11 34885.5 842.029   3
   1  -5  12 31486.4 840.224   3
   1   5  12 33118.3 821.898   3
   1   5  13 58699.5 1083.83   3
   1  -5  13 57715.3 1095.18   3
   1   5  14 1063.26 518.203   3
   1  -5  14 1278.05 587.822   3
   1   5  15 4786.98 597.734   3
   1  -5  15 4372.87 600.823   3
   1  -5  16 5844.19 655.721   3
   1   5  16 5587.64 650.037   3
   1   5  17 22528.7 879.864   3
   1  -5  17 22948.0 940.031   3
   1  -5  18 8079.07 716.116   3
   1   5  18 9001.54 727.206   3
   1   5  18 8415.53 561.423   0
   1  -5  19 5984.68 767.890   3
   1   5  19 6115.43 698.422   3
   1   5  19 5670.32 540.441   0
   1  -5  20 1754.64 628.560   3
   1   5  20 1205.29 623.390   3
   1   5  20 1274.68 477.638   0
   1  -5  21 140.165 696.083   3
   1   5  21 312.733 568.594   3
   1   5  21 301.023 467.878   0
   1  -5  22 8304.43 804.401   3
   1   5  22 8077.48 811.827   3
   1   5  23 12537.5 934.091   3
   1  -5  23 12367.7 975.546   3
   1  -5  24 300.790 652.017   3
   1   5  24 375.889 716.136   3
   1  -5  25 1503.20 820.059   3
   1   5  25 2119.31 725.388   3
   1   5  26 867.523 728.136   3
   1  -5  26 366.321 695.124   3
   1   5  27 449.855 723.163   3
  -1   6  27 2763.16 741.329   3
  -1  -6  27 2920.73 730.788   3
  -1  -6  26 368.351 701.622   3
  -1   6  26 765.449 673.571   3
  -1   6  25 183.876 633.974   0
  -1   6  25 223.200 638.927   3
  -1  -6  25 349.696 709.289   3
  -1   6  24-273.295 639.954   0
  -1  -6  24 563.065 707.367   3
  -1   6  24 265.511 609.654   3
  -1   6  23 3037.68 655.505   3
  -1   6  23 2534.82 691.923   0
  -1  -6  23 3224.54 750.284   3
  -1  -6  22 372.885 661.087   3
  -1   6  22-28.5578 577.373   3
  -1   6  22 139.778 627.781   0
  -1   6  21 121.337 621.105   0
  -1   6  21 82.3475 540.844   3
  -1  -6  21 299.644 624.614   3
  -1   6  20 163.393 519.981   3
  -1   6  20-142.954 601.572   0
  -1  -6  20 450.998 628.663   3
  -1  -6  19 18267.6 894.471   3
  -1   6  19 18687.0 798.797   3
  -1  -6  18 100.726 599.472   3
  -1   6  18 67.7910 486.031   3
  -1  -6  17 2600.00 615.949   3
  -1   6  17 2670.50 504.290   3
  -1   6  16 2863.44 487.792   3
  -1  -6  16 3033.35 563.561   3
   1   6 -16 3179.70 195.009   1
  -1   6  15 13743.1 619.051   3
  -1  -6  15 13979.4 740.843   3
   1   6 -15 13672.8 325.757   1
   1   6 -14 14770.9 356.297   1
  -1   6  14 14839.8 605.162   3
  -1  -6  14 14460.0 692.575   3
  -1   6  13 191917. 1616.93   3
  -1  -6  13 194929. 1825.57   3
  -1   6  12 2736.68 381.676   3
  -1  -6  12 3120.39 521.990   3
  -1  -6  11 907.103 444.908   3
  -1   6  11 651.369 339.321   3
  -1   6  10 499.970 302.863   3
  -1  -6  10 382.828 387.118   3
  -1   6   9 98882.6 966.203   3
  -1  -6   9 99194.7 1119.61   3
  -1  -6   8 7398.28 432.832   3
  -1   6   8 7362.70 341.058   3
   1  -6  -7 6637.99 301.981   3
  -1   6   7 6178.08 312.058   3
  -1  -6   7 6472.11 411.742   3
   1  -6  -6 1296.66 192.185   3
  -1  -6   6 993.751 350.623   3
  -1   6   6 1101.51 231.893   3
   1  -6  -5 53611.1 534.407   3
  -1  -6   5 53363.8 743.939   3
  -1  -6   4 109046. 958.261   3
   1  -6  -4 108346. 695.679   3
   1   6  -3 14489.1 380.426   3
  -1  -6   3 14709.5 468.841   3
   1  -6  -3 14144.9 270.754   3
  -1   6   3 14667.7 401.558   2
  -1   6   2 1687.21 223.901   2
  -1  -6   2 1650.22 334.028   3
   1  -6  -1 4162.41 206.757   3
   1  -6  -1 3839.17 313.243   2
  -1   6   1 3621.53 296.844   2
  -1   6   0 38203.7 420.758   3
  -1   6   0 37545.1 515.945   2
   1  -6   0 38484.1 420.624   3
   1  -6   0 38570.0 540.412   2
   1  -6   1 68976.0 670.749   2
  -1   6  -1 64300.8 579.008   3
   1  -6   1 67942.8 587.171   3
  -1   6  -2 37156.9 482.823   3
   1  -6   2 37247.9 501.037   3
  -1   6  -3 8229.21 319.083   3
  -1  -6  -3 7731.79 325.300   3
   1  -6   3 9003.43 368.142   3
   1  -6   4 23150.4 518.234   3
   1  -6   5 569517. 8533.31   3
   1   6   5 576954. 8915.18   3
   1  -6   6 17097.0 501.685   3
   1   6   6 17163.9 524.843   3
   1  -6   7 41164.9 730.402   3
   1   6   7 39679.7 743.947   3
  -1   6  -7 41678.1 559.009   0
   1  -6   8 36125.1 739.316   3
   1   6   8 33970.8 697.058   3
   1   6   9 35907.2 744.506   3
   1  -6   9 36058.8 764.761   3
   1  -6  10 324.745 453.089   3
   1   6  10 227.335 420.867   3
   1  -6  11 174991. 1664.55   3
   1   6  11 173423. 1619.56   3
  -1   6 -11 172877. 688.849   1
   1   6  12 5285.96 559.098   3
   1  -6  12 5274.88 598.659   3
   1   6  13 12726.1 653.420   3
   1  -6  13 13383.4 729.148   3
   1   6  14 108.648 518.619   3
   1  -6  14 346.297 542.361   3
   1   6  15 5608.36 623.091   3
   1  -6  15 5604.31 627.366   3
   1  -6  16 1095.11 616.767   3
   1   6  16 756.537 570.102   3
   1   6  17 17719.4 852.201   3
   1  -6  17 17516.1 886.593   3
   1  -6  18-353.042 579.209   3
   1   6  18-59.7613 546.596   3
   1   6  19 6697.15 704.328   3
   1  -6  19 6272.90 785.572   3
   1  -6  20 1393.35 676.546   3
   1   6  20 1639.21 633.305   3
   1   6  20 1310.81 469.828   0
   1  -6  21 4730.72 720.147   3
   1   6  21 4743.57 701.877   3
   1   6  21 4293.28 541.704   0
   1  -6  22 1511.90 755.443   3
   1   6  22 842.757 615.591   3
   1  -6  23 2300.22 702.882   3
   1   6  23 3810.06 776.691   3
   1   6  24 660.536 732.589   3
   1  -6  24 81.7032 784.202   3
   1  -6  25 3187.79 750.677   3
   1   6  25 2981.13 764.026   3
   1   6  26 541.267 694.008   3
   1  -6  26 1108.89 811.221   3
   1   6  27 346.617 663.738   3
  -1  -7  27 1025.81 791.801   3
  -1   7  27 1214.53 662.586   3
  -1  -7  26 290.865 725.511   3
  -1   7  26-56.1903 627.965   3
  -1   7  25 3333.03 684.942   0
  -1   7  25 3076.97 662.595   3
  -1  -7  25 3428.33 736.608   3
  -1   7  24 2003.67 661.321   0
  -1  -7  24 3229.36 711.743   3
  -1   7  24 2862.75 633.358   3
  -1  -7  23 71.2947 615.511   3
  -1   7  23 252.794 558.085   3
  -1   7  23-348.370 638.019   0
  -1   7  22 120.560 641.395   0
  -1   7  22 552.808 556.795   3
  -1  -7  22 381.573 602.944   3
  -1  -7  21 17229.1 909.878   3
  -1   7  21 16719.9 886.963   0
  -1   7  21 16739.5 835.423   3
  -1  -7  20 6347.95 698.663   3
  -1   7  20 6483.89 628.117   3
  -1   7  19 210.317 510.271   3
  -1  -7  19 178.763 586.565   3
  -1   7  18 40.6227 487.925   3
  -1  -7  18-8.85753 601.167   3
  -1  -7  17 31811.4 1011.09   3
  -1   7  17 31171.8 889.346   3
  -1  -7  16 3885.58 597.380   3
  -1   7  16 4027.36 534.218   3
   1   7 -16 4239.34 233.405   1
  -1  -7  15 18878.9 822.796   3
   1   7 -15 17912.2 385.955   1
  -1   7  15 17352.7 682.998   3
  -1  -7  14 680.355 500.729   3
  -1   7  14 304.773 406.870   3
  -1  -7  13 6387.78 576.952   3
  -1   7  13 5979.88 483.825   3
  -1   7  12 12653.6 538.455   3
  -1  -7  12 13401.1 633.812   3
  -1  -7  11 101996. 1261.88   3
  -1   7  11 100282. 1104.69   3
  -1  -7  10 6330.26 530.540   3
  -1   7  10 5299.86 382.589   3
  -1  -7   9 44685.5 837.257   3
  -1   7   9 45601.9 704.910   3
  -1  -7   8 349.761 390.204   3
  -1   7   8 166.041 261.214   3
  -1  -7   7 184915. 1415.25   3
   1  -7  -7 186467. 1164.55   3
  -1   7   7 187088. 1176.30   3
   1  -7  -6 66748.1 670.226   3
  -1  -7   6 67047.2 877.582   3
  -1  -7   5 16814.7 521.656   3
   1  -7  -5 16077.6 340.363   3
  -1  -7   4 33994.8 623.688   3
   1  -7  -4 33213.3 430.524   3
  -1  -7   3 50968.8 717.713   3
  -1   7   2 60977.4 701.733   2
  -1  -7   2 58488.7 732.923   3
   1  -7  -1 32098.3 411.882   3
   1  -7  -1 32780.7 551.346   2
  -1   7   1 32875.9 524.059   2
  -1   7   0 27156.1 404.528   3
   1  -7   0 27092.9 412.655   3
   1  -7   0 28480.7 493.289   2
  -1   7   0 27194.3 453.680   2
  -1   7  -1 673.999 205.829   3
   1  -7   1 793.809 246.729   3
   1  -7   1 676.903 306.663   2
  -1   7  -2 9999.45 334.186   3
   1  -7   2 10262.9 360.210   3
  -1   7  -3 191083. 1163.01   3
   1  -7   3 192798. 1179.68   3
   1  -7   4 8724.01 414.261   3
   1  -7   5 27983.9 587.095   3
   1   7   6 9467.36 484.252   3
   1  -7   6 8841.44 466.409   3
   1   7   7 161878. 1363.27   3
   1  -7   7 163369. 1358.74   3
   1  -7   8 80.7068 391.280   3
   1   7   8 143.407 375.672   3
   1   7   9 74774.5 1027.66   3
   1  -7   9 75430.3 1061.32   3
   1  -7  10 70809.6 1082.85   3
   1   7  10 68756.6 1050.04   3
   1  -7  11 36289.1 882.078   3
   1   7  11 35892.7 845.795   3
   1  -7  12 13161.7 668.393   3
   1   7  12 12443.9 626.667   3
   1   7  13 106712. 1418.52   3
   1  -7  13 104889. 1442.24   3
   1  -7  14 514.837 539.129   3
   1   7  14 598.451 507.659   3
   1  -7  15 11032.3 714.255   3
   1   7  15 11254.5 714.679   3
   1   7  16 2739.18 606.705   3
   1  -7  16 3413.29 651.085   3
   1  -7  17 19152.2 919.289   3
   1   7  17 20048.2 866.002   3
   1   7  18 9112.51 743.900   3
   1  -7  18 10010.9 802.197   3
   1  -7  19 10982.2 787.642   3
   1   7  19 11643.5 787.824   3
   1   7  20 1127.14 591.779   3
   1  -7  20 1229.43 706.833   3
   1  -7  21 4456.61 769.208   3
   1   7  21 3157.46 531.533   0
   1   7  21 3850.09 726.701   3
   1  -7  22 110.919 651.504   3
   1   7  22 177.697 612.926   3
   1  -7  23 5766.04 875.762   3
   1   7  23 5852.25 769.651   3
   1   7  24-5.30255 727.781   3
   1  -7  24 548.552 674.329   3
   1  -7  25 1740.67 812.428   3
   1   7  25 566.404 726.972   3
   1  -7  26 843.085 806.214   3
   1   7  26 100.299 660.868   3
  -1  -8  26 1646.43 779.077   3
  -1   8  26 1988.65 648.241   3
  -1  -8  25 905.016 768.358   3
  -1   8  25 34.1587 577.050   3
  -1   8  25 195.134 615.349   0
  -1   8  24 939.496 600.814   0
  -1   8  24 1387.45 625.416   3
  -1  -8  24 1846.68 769.856   3
  -1   8  23 1761.63 661.552   0
  -1  -8  23 2203.07 747.808   3
  -1   8  23 1628.41 602.850   3
  -1  -8  22 2303.88 725.576   3
  -1   8  22 1682.81 582.876   3
  -1   8  22 1811.25 686.131   0
  -1   8  21 723.607 547.485   3
  -1  -8  21 531.955 658.658   3
  -1  -8  20 427.399 625.967   3
  -1   8  20 541.960 506.585   3
  -1   8  19 14170.1 739.731   3
  -1  -8  19 13001.4 796.717   3
  -1   8  18 11340.0 667.365   3
  -1  -8  18 10780.4 749.240   3
  -1  -8  17 11230.7 783.150   3
  -1   8  17 12031.1 672.207   3
  -1  -8  16-19.5878 532.068   3
   1   8 -16 247.259 210.155   1
  -1   8  16 246.380 470.547   3
  -1   8  15 42439.6 929.847   3
  -1  -8  15 43296.4 1089.96   3
  -1   8  14 46811.1 917.465   3
  -1  -8  14 46385.2 1046.99   3
  -1  -8  13 855.714 495.557   3
  -1   8  13 716.205 397.712   3
  -1   8  12 25661.7 675.209   3
  -1  -8  12 26108.6 796.755   3
  -1  -8  11 1085.84 484.348   3
  -1   8  11 779.390 359.473   3
  -1   8  10 42725.0 737.433   3
  -1  -8  10 44079.5 885.151   3
  -1  -8   9 79518.4 1077.72   3
  -1   8   9 81029.6 924.651   3
  -1   8   8 22600.4 514.191   3
  -1  -8   8 23035.4 646.952   3
  -1  -8   7 13135.3 545.186   3
   1  -8  -6 5114.24 260.462   3
  -1  -8   6 5261.86 446.480   3
   1  -8  -5 49379.9 575.594   3
  -1  -8   5 51132.1 769.883   3
  -1  -8   4 7680.50 440.392   3
   1  -8  -4 8152.09 271.191   3
  -1  -8   3 55651.0 769.197   3
  -1  -8   2 3655.72 396.760   3
  -1   8   1 5277.27 297.395   2
   1  -8  -1 5203.06 265.982   3
   1  -8  -1 5116.61 359.736   2
   1  -8   0 162806. 971.799   3
   1  -8   0 167120. 1093.52   2
  -1   8  -1 136771. 934.422   3
   1  -8   1 137195. 937.994   3
   1  -8   1 140763. 1013.03   2
   1   8   1 136262. 610.755   2
   1  -8   2 158103. 1056.95   3
  -1   8  -2 156224. 1058.26   3
   1  -8   3 13467.1 424.366   3
   1  -8   4 205900. 1339.31   3
   1  -8   5 199852. 1388.97   3
   1  -8   6 88329.2 1019.30   3
   1   8   7 15874.9 565.262   3
   1  -8   7 15349.1 535.048   3
   1   8   8 195.153 390.895   3
   1  -8   8-10.4071 367.406   3
   1   8   9 11208.0 537.320   3
   1  -8   9 12775.5 593.045   3
   1  -8  10 67533.4 1090.70   3
   1   8  10 66183.9 1048.95   3
   1  -8  11 68724.8 1142.81   3
   1   8  11 67652.9 1105.41   3
   1   8  12 5815.65 573.023   3
   1  -8  12 5651.00 565.843   3
   1   8  13 984.953 522.168   3
   1  -8  13 1073.60 515.239   3
   1   8  14 1161.63 496.543   3
   1  -8  14 1108.71 557.947   3
   1  -8  15 53568.6 1189.31   3
   1   8  15 53109.4 1152.98   3
   1   8  16 5757.52 641.803   3
   1  -8  16 5611.23 661.643   3
   1  -8  17 1596.50 635.945   3
   1   8  17 1033.31 541.356   3
   1  -8  18 3169.20 707.743   3
   1   8  18 3256.82 590.383   3
   1   8  19 495.253 596.329   3
   1  -8  19 115.415 657.333   3
   1   8  20 8017.43 764.248   3
   1  -8  20 7106.94 735.580   3
   1   8  21 1157.25 603.780   3
   1  -8  21 911.224 712.420   3
   1  -8  22 957.334 770.902   3
   1   8  22 588.097 689.486   3
   1  -8  23 203.055 650.482   3
   1   8  23 227.925 618.138   3
   1  -8  24 6855.16 916.079   3
   1   8  24 8763.11 889.007   3
   1  -8  25 1744.04 843.709   3
   1   8  25 2422.00 781.378   3
   1   8  26 3444.67 769.816   3
  -1   9  26 4592.97 754.566   3
  -1  -9  26 4166.36 766.531   3
  -1   9  25 265.911 620.983   3
  -1  -9  25 304.154 671.321   3
  -1   9  25 267.206 678.018   0
  -1   9  24 3080.02 656.595   3
  -1  -9  24 3167.67 738.596   3
  -1   9  24 2638.06 670.351   0
  -1   9  23 715.680 586.446   0
  -1  -9  23 960.687 644.855   3
  -1   9  23 50.4459 555.574   3
  -1  -9  22 4849.24 719.829   3
  -1   9  22 5751.30 673.867   3
  -1  -9  21 2152.03 646.521   3
  -1   9  21 2203.71 574.797   3
  -1  -9  20 6271.12 750.349   3
  -1   9  20 5952.34 620.288   3
  -1  -9  19 364.233 652.903   3
  -1   9  19 192.566 501.779   3
  -1  -9  18 628.481 604.836   3
  -1   9  18 83.9528 490.114   3
  -1   9  17 743.158 485.608   3
  -1  -9  17 1058.94 602.678   3
  -1  -9  16 44246.2 1137.19   3
   1   9 -16 43721.9 600.775   1
  -1   9  16 42213.1 969.744   3
  -1   9  15 19233.9 715.028   3
  -1  -9  15 20132.1 854.251   3
  -1   9  14 17739.1 665.010   3
  -1  -9  14 18356.9 787.831   3
  -1  -9  13 363.278 503.448   3
  -1   9  13 460.903 386.290   3
  -1   9  12 23258.8 660.706   3
  -1  -9  12 24102.2 781.124   3
  -1  -9  11 13455.0 646.682   3
  -1   9  11 12614.2 520.071   3
  -1  -9  10 53021.3 982.925   3
  -1   9  10 51977.1 816.546   3
  -1   9   9 1842.20 329.952   3
  -1  -9   9 1972.13 472.050   3
  -1  -9   8 99977.6 1191.04   3
  -1  -9   7 54727.1 877.269   3
  -1  -9   6 117560. 1181.77   3
   1  -9  -5 38.2560 192.810   3
  -1  -9   5-246.412 375.056   3
   1  -9  -4 15278.9 364.267   3
  -1  -9   4 16912.0 541.303   3
  -1  -9   3 21166.5 558.096   3
  -1  -9   2 69578.2 859.322   3
   1  -9  -1 716.637 287.367   2
  -1  -9   1 635.432 87.4649   2
  -1  -9   1 437.965 366.333   3
   1  -9  -1 584.474 226.270   3
   1  -9   0 2253.52 313.371   2
   1  -9   0 2285.82 270.847   3
   1   9   1 112008. 599.083   2
   1  -9   1 113095. 948.087   2
  -1   9  -1 113686. 902.931   3
   1  -9   1 112786. 905.340   3
   1  -9   2 207073. 1270.35   2
   1  -9   2 209664. 1272.19   3
   1  -9   3 84224.7 884.555   3
   1  -9   4 488379. 8345.71   3
   1  -9   5 16409.9 512.639   3
   1  -9   6 1030.98 343.944   3
   1  -9   7 27777.1 689.711   3
   1  -9   8 190129. 1612.04   3
   1  -9   9 2027.20 490.268   3
   1   9   9 1654.10 428.186   3
   1   9  10 10113.2 574.387   3
   1  -9  10 10343.2 589.578   3
   1  -9  11 171.584 517.206   3
   1   9  11 255.347 451.636   3
   1   9  12 2678.60 495.499   3
   1  -9  12 3272.43 536.217   3
   1   9  13 2704.65 525.004   3
   1  -9  13 2200.18 539.557   3
   1   9  14 3805.89 564.903   3
   1  -9  14 3305.40 631.941   3
   1   9  15 2224.14 610.797   3
   1  -9  15 2364.21 649.965   3
   1  -9  16 5506.91 705.953   3
   1   9  16 5946.36 634.451   3
   1   9  17 1400.02 554.303   3
   1  -9  17 1094.38 569.977   3
   1  -9  18 4857.18 676.828   3
   1   9  18 4198.15 626.254   3
   1   9  19 8503.95 707.600   3
   1  -9  19 9265.99 812.308   3
   1   9  20 330.124 562.928   3
   1  -9  20 683.879 733.290   3
   1   9  21 824.521 660.395   3
   1  -9  21 868.599 706.999   3
   1   9  22 14024.4 905.328   3
   1  -9  22 13263.2 911.681   3
   1  -9  23 2757.28 806.392   3
   1   9  23 3022.58 745.324   3
   1  -9  24 670.873 815.827   3
   1   9  24 773.061 653.087   3
   1  -9  25 1055.89 715.969   3
   1   9  25 818.859 730.334   3
   1   9  26 4622.72 821.256   3
  -1 -10  26 851.247 775.739   3
  -1  10  25-186.283 674.659   0
  -1  10  25 783.792 610.300   3
  -1 -10  25 151.802 749.553   3
  -1 -10  24 5394.36 858.585   3
  -1  10  24 5175.65 713.613   3
  -1  10  24 5302.02 809.518   0
  -1  10  23 92.7560 551.871   3
  -1  10  23 105.455 610.832   0
  -1 -10  23 1288.37 759.516   3
  -1 -10  22 14351.8 971.208   3
  -1  10  22 14160.2 823.234   3
  -1  10  21 438.752 532.468   3
  -1 -10  21 47.8154 668.546   3
  -1  10  20 4238.67 589.647   3
  -1 -10  20 3224.98 691.840   3
  -1 -10  19 452.146 584.514   3
  -1  10  19 229.135 495.330   3
  -1 -10  18 15019.6 873.137   3
  -1  10  18 13761.3 713.851   3
  -1  10  17-154.905 463.918   3
  -1 -10  17 588.160 611.129   3
  -1  10  16 8668.45 594.175   3
  -1 -10  16 8935.61 747.042   3
  -1 -10  15 10948.8 725.206   3
  -1  10  15 10761.2 618.267   3
  -1 -10  14 16369.7 800.982   3
  -1  10  14 15449.2 638.176   3
  -1  10  13 571.573 415.899   3
  -1 -10  13 529.086 556.038   3
  -1  10  12 2441.55 409.303   3
  -1 -10  12 2712.83 580.587   3
  -1 -10  11 11695.9 635.857   3
  -1  10  11 11449.1 511.958   3
  -1 -10  10 56468.7 1039.49   3
  -1 -10   9 93.2767 417.133   3
  -1 -10   8 10513.5 552.829   3
  -1 -10   7 33464.9 763.413   3
  -1 -10   6 2343.00 420.510   3
  -1 -10   5 2151.88 451.749   3
  -1 -10   4 251080. 1655.41   3
  -1 -10   3 1030.74 358.090   3
   1 -10  -2 3670.05 285.481   3
  -1 -10   2 3623.09 365.759   3
  -1 -10   2 3601.37 169.608   2
  -1 -10   1 578.835 376.325   3
   1 -10  -1 319.621 242.960   3
   1 -10  -1 250.862 298.401   2
  -1 -10   1 335.369 115.767   2
   1 -10   0 100922. 878.094   3
   1 -10   0 98977.4 923.418   2
   1 -10   1 29942.0 560.041   2
   1 -10   1 30051.1 540.245   3
   1  10   1 30125.9 351.696   2
   1  10   2 228222. 1012.50   2
   1 -10   2 224418. 1363.49   2
   1 -10   2 225067. 1385.80   3
   1 -10   3 52299.7 758.597   3
   1 -10   4 99438.4 1038.70   3
   1 -10   5 1187.98 341.301   3
   1 -10   6 53338.7 851.027   3
   1 -10   7 124.074 414.125   3
   1 -10   8 4757.67 514.216   3
   1 -10   9 9975.59 601.897   3
   1 -10  10 47251.7 968.669   3
   1  10  10 45362.5 943.273   3
   1 -10  11 4383.60 583.010   3
   1  10  11 3924.17 522.793   3
   1  10  12 2399.00 510.734   3
   1 -10  12 1342.04 509.138   3
   1 -10  13 7754.23 684.742   3
   1  10  13 7186.15 591.952   3
   1 -10  14 111875. 1618.10   3
   1  10  14 110075. 1537.08   3
   1 -10  15 30640.8 1037.14   3
   1  10  15 29736.4 960.613   3
   1 -10  16 25068.9 1006.78   3
   1  10  16 25880.5 917.166   3
   1 -10  17 43.9516 641.185   3
   1  10  17 156.378 570.055   3
   1 -10  18 367.757 655.464   3
   1  10  18 704.906 592.921   3
   1  10  19 238.753 595.032   3
   1 -10  19 491.772 665.083   3
   1 -10  20 12624.7 877.893   3
   1  10  20 13195.3 856.899   3
   1 -10  21-105.547 612.016   3
   1  10  21-151.329 613.895   3
   1  10  22 1156.59 630.661   3
   1 -10  22 1316.10 780.689   3
   1 -10  23 703.548 784.643   3
   1  10  23-5.14686 697.720   3
   1 -10  24 4062.99 802.395   3
   1  10  24 4139.22 734.249   3
   1  10  25-66.2590 717.737   3
   1 -10  25-19.3181 728.509   3
   1  10  26 5078.16 837.718   3
  -1 -11  25 983.483 787.100   3
  -1  11  25 588.353 630.589   3
  -1  11  25-440.683 627.599   0
  -1 -11  24 2509.06 811.469   3
  -1  11  24 525.445 664.485   0
  -1  11  24 2376.67 633.716   3
  -1 -11  23 947.397 751.643   3
  -1  11  23 523.721 593.868   3
  -1 -11  22 380.742 701.705   3
  -1  11  22 664.556 558.507   3
  -1 -11  21 3033.48 653.111   3
  -1  11  21 2807.31 588.271   3
  -1  11  20 10845.0 710.028   3
  -1 -11  20 10521.0 800.320   3
  -1  11  19 37.3228 479.606   3
  -1 -11  19 775.224 670.210   3
  -1 -11  18 1898.30 660.273   3
  -1  11  18 2799.45 551.865   3
  -1 -11  17 4323.36 679.046   3
  -1  11  17 4810.39 548.435   3
  -1 -11  16 12697.3 808.420   3
  -1  11  16 11256.0 635.928   3
  -1 -11  15 45381.2 1156.49   3
  -1  11  15 45098.3 985.880   3
  -1  11  14 250.322 434.401   3
  -1 -11  14 496.624 555.552   3
  -1 -11  13 1654.00 556.577   3
  -1  11  13 1578.89 437.179   3
  -1 -11  12 252.866 493.865   3
  -1 -11  11 33330.8 902.942   3
  -1 -11  10-46.0070 461.841   3
  -1 -11   9 2301.53 505.481   3
  -1 -11   8 35043.4 839.048   3
  -1 -11   7 10952.6 567.910   3
  -1 -11   6 115973. 1270.52   3
  -1 -11   5 8255.48 488.303   3
  -1 -11   4 46717.8 819.939   3
  -1 -11   3 879.621 383.493   3
  -1 -11   2 71138.2 525.530   2
   1 -11  -2 70410.3 768.842   3
  -1 -11   2 70253.0 940.419   3
  -1 -11   1 8840.51 486.189   3
  -1 -11   1 9660.61 224.189   2
   1 -11  -1 8778.35 421.269   2
   1 -11  -1 8847.93 374.136   3
   1 -11   0 4343.24 359.882   2
   1 -11   0 4243.84 339.304   3
   1  11   1 5899.83 209.316   2
   1 -11   1 6201.57 375.093   2
   1 -11   1 6198.16 370.049   3
   1 -11   2 48358.7 714.191   2
   1 -11   2 50301.0 727.016   3
   1  11   2 49414.8 506.458   2
   1 -11   3 157728. 1279.87   3
   1 -11   4 100694. 1068.34   3
   1 -11   5 4314.87 395.349   3
   1 -11   6 38879.5 767.481   3
   1 -11   7 88311.6 1142.90   3
   1 -11   8 38833.9 864.921   3
   1 -11   9 21100.8 739.678   3
   1 -11  10 4867.46 572.461   3
   1 -11  11 7173.05 594.907   3
   1 -11  12 26412.6 893.246   3
   1  11  12 25816.8 838.337   3
   1  11  13 3082.49 555.656   3
   1 -11  13 2931.70 624.659   3
   1  11  14 21451.5 831.267   3
   1 -11  14 19525.7 836.313   3
   1  11  15 2899.32 627.823   3
   1 -11  15 1783.59 609.485   3
   1 -11  16 15860.4 851.098   3
   1  11  16 17201.6 813.282   3
   1  11  17 4302.58 655.157   3
   1 -11  17 3948.21 666.612   3
   1 -11  18 16139.7 862.611   3
   1  11  18 17151.7 844.856   3
   1 -11  19 2106.06 628.400   3
   1  11  19 1609.82 602.426   3
   1 -11  20 1089.86 691.199   3
   1  11  20 576.519 582.427   3
   1 -11  21 544.705 740.457   3
   1  11  21 626.100 617.652   3
   1 -11  22 2969.49 816.541   3
   1  11  22 2199.37 719.597   3
   1 -11  23 529.236 732.728   3
   1  11  23 350.936 649.384   3
   1  11  24 3469.25 754.446   3
   1 -11  24 3182.19 758.030   3
   1 -11  25 539.893 819.774   3
   1  11  25 180.940 704.621   3
   1  11  26 1028.74 781.597   3
  -1 -12  25 452.057 771.653   3
  -1  12  25-121.823 696.722   0
  -1 -12  24 802.996 742.459   3
  -1  12  24 1522.41 604.175   3
  -1 -12  23 2827.47 735.583   3
  -1  12  23 2954.58 622.411   3
  -1  12  22-17.1780 546.848   3
  -1 -12  22 539.342 639.107   3
  -1 -12  21 34.3513 665.622   3
  -1  12  21 144.825 521.952   3
  -1 -12  20 381.876 686.684   3
  -1  12  20 508.073 508.649   3
  -1 -12  19 7948.16 797.535   3
  -1  12  19 8268.23 645.414   3
  -1  12  18 2506.11 542.743   3
  -1 -12  18 2517.10 634.823   3
  -1 -12  17 18668.7 942.619   3
  -1  12  17 18175.2 754.455   3
  -1 -12  16 1858.03 604.687   3
  -1  12  16 2184.39 484.797   3
  -1 -12  15 11997.8 794.806   3
  -1 -12  14 35210.1 1047.49   3
  -1 -12  13 63830.6 1273.11   3
  -1 -12  12 21201.3 845.946   3
  -1 -12  11 221.669 520.794   3
  -1 -12  10 173.371 457.121   3
  -1 -12   9 41787.8 938.162   3
  -1 -12   8 8071.18 596.533   3
  -1 -12   7 38244.8 862.234   3
  -1 -12   6 12674.7 585.983   3
  -1 -12   5 293.901 425.446   3
  -1 -12   4 9353.73 539.101   3
  -1 -12   3 49720.9 854.092   3
  -1 -12   3 48071.1 499.534   2
   1 -12  -2 7638.79 369.973   3
  -1 -12   2 7719.21 477.198   3
  -1 -12   2 7669.66 234.334   2
  -1 -12   1 12526.5 545.662   3
  -1 -12   1 13744.6 274.572   2
   1 -12  -1 13464.8 433.901   3
   1 -12  -1 14159.9 482.227   2
   1 -12   0 9242.51 401.029   3
   1 -12   0 9610.73 418.185   2
   1 -12   1 55687.4 777.712   3
   1  12   1 59236.9 532.776   2
   1 -12   1 58225.6 777.729   2
   1 -12   2 1754.06 330.146   2
   1 -12   2 1576.33 323.748   3
   1  12   2 1529.66 179.004   2
   1 -12   3 533.586 320.947   2
   1 -12   3 417.974 319.172   3
   1  12   3 418.345 189.776   2
   1 -12   4 6408.69 446.657   3
   1 -12   5 13675.0 552.440   3
   1 -12   6 79238.6 1077.41   3
   1 -12   7 38094.8 839.481   3
   1 -12   8 8641.22 553.743   3
   1 -12   9 99163.2 1328.18   3
   1 -12  10 10469.5 655.942   3
   1 -12  11 38515.7 992.523   3
   1 -12  12 5984.82 645.403   3
   1 -12  13 2970.37 632.925   3
   1 -12  14 349.282 649.472   3
   1 -12  15 57361.4 1302.87   3
   1  12  15 55780.5 1213.86   3
   1  12  16 1672.52 600.386   3
   1 -12  16 1536.90 674.734   3
   1  12  17 8059.68 689.271   3
   1 -12  17 7124.54 769.809   3
   1  12  18 295.141 570.610   3
   1 -12  18 445.626 656.549   3
   1  12  19 4913.35 714.780   3
   1 -12  19 4527.18 764.096   3
   1  12  20 781.528 650.423   3
   1 -12  20 1426.72 749.928   3
   1 -12  21 6637.92 886.730   3
   1  12  21 5324.12 771.182   3
   1  12  22 1439.59 672.587   3
   1 -12  22 2717.37 788.028   3
   1  12  23 1653.31 667.460   3
   1 -12  23 1072.96 677.626   3
   1  12  24 4418.41 812.418   3
   1 -12  24 3860.75 817.164   3
   1  12  25 3484.37 735.426   3
   1  12  26 531.241 766.867   3
  -1 -13  25 2547.20 831.965   3
  -1  13  25 1558.85 690.819   0
  -1 -13  24 804.837 729.673   3
  -1 -13  23 454.056 645.615   3
  -1 -13  22 476.752 650.230   3
  -1 -13  21 7840.36 855.598   3
  -1 -13  20 816.810 715.903   3
  -1 -13  19 3623.78 678.772   3
  -1 -13  18 5050.53 753.996   3
  -1 -13  17 33335.7 1122.12   3
  -1 -13  16 1197.12 653.421   3
  -1 -13  15 18365.5 848.132   3
  -1 -13  14 351.020 641.717   3
  -1 -13  13 16949.1 862.992   3
  -1 -13  12 20164.7 856.379   3
  -1 -13  11 32625.6 928.134   3
  -1 -13  10 300.148 475.888   3
  -1 -13   9 7770.85 611.042   3
  -1 -13   8 214.968 507.926   3
  -1 -13   7 33270.7 853.449   3
  -1 -13   6 2599.18 515.446   3
  -1 -13   5 64340.6 1023.69   3
  -1 -13   4 31243.1 775.294   3
  -1 -13   3 20903.9 672.390   3
  -1 -13   3 20261.9 367.553   2
  -1 -13   2 59865.3 958.113   3
  -1 -13   2 60533.0 547.911   2
   1 -13  -2 61141.9 810.764   3
  -1 -13   1 111012. 714.939   2
   1 -13  -1 106776. 1045.85   3
  -1 -13   1 106945. 1211.11   3
   1 -13  -1 111028. 1097.39   2
   1 -13   0 33985.2 643.755   3
   1 -13   0 33768.5 647.955   2
   1 -13   1 5265.61 390.904   3
   1  13   1 6173.42 236.841   2
   1 -13   1 5967.32 404.520   2
   1  13   2 1359.66 199.158   2
   1 -13   2 1383.52 342.197   2
   1 -13   2 1687.18 346.220   3
   1  13   3 37532.6 524.528   2
   1 -13   3 37486.5 692.499   2
   1 -13   3 37571.2 727.872   3
   1 -13   4 317.731 357.751   3
   1 -13   5 31224.1 735.188   3
   1 -13   6 128.236 391.114   3
   1 -13   7 150947. 1533.70   3
   1 -13   8 3171.98 526.698   3
   1 -13   9 42533.2 974.397   3
   1 -13  10 3988.60 593.919   3
   1 -13  11 17228.0 768.129   3
   1 -13  12 1823.88 624.106   3
   1 -13  13 66164.5 1310.87   3
   1 -13  14 3254.64 650.147   3
   1 -13  15 6418.96 751.954   3
   1 -13  16 13414.0 883.083   3
   1 -13  17 32175.5 1137.78   3
   1 -13  18 534.482 707.259   3
   1 -13  19 1922.89 732.855   3
   1 -13  20 756.146 737.599   3
   1 -13  21 236.833 741.344   3
   1 -13  22 755.930 699.395   3
   1 -13  23 2885.70 738.391   3
   1 -13  24 908.250 774.677   3
  -1 -14  24 1723.08 752.835   3
  -1 -14  23 1724.07 689.539   3
  -1 -14  22 2061.59 700.494   3
  -1 -14  21 491.931 744.587   3
  -1 -14  20 1153.22 733.687   3
  -1 -14  19 16385.3 919.000   3
  -1 -14  18 3820.04 746.526   3
  -1 -14  17 2749.64 696.381   3
  -1 -14  16 4695.25 737.323   3
  -1 -14  15 7596.82 711.630   3
  -1 -14  14 2708.44 681.345   3
  -1 -14  13 58470.8 1287.73   3
  -1 -14  12 15245.0 840.843   3
  -1 -14  11 2649.30 597.616   3
  -1 -14  10 4766.52 584.071   3
  -1 -14   9 5604.79 602.258   3
  -1 -14   8 4491.99 533.404   3
  -1 -14   7 57767.3 1063.48   3
  -1 -14   6 22717.6 746.083   3
  -1 -14   5 41503.8 890.216   3
  -1 -14   4 49645.6 951.693   3
  -1 -14   3 18766.0 646.739   3
   1 -14  -3 18454.3 537.570   3
  -1 -14   3 19926.5 380.159   2
   1 -14  -2 46118.6 753.674   3
  -1 -14   2 44794.7 883.186   3
  -1 -14   2 43832.9 506.363   2
   1 -14  -1 23445.7 609.882   2
   1 -14  -1 22761.4 574.489   3
  -1 -14   1 22804.5 713.029   3
  -1 -14   0 41264.3 845.922   3
   1 -14   0 39680.4 721.202   2
   1 -14   0 38210.3 720.905   3
   1 -14   1 104620. 1077.52   2
   1 -14   1 99232.9 1094.69   3
   1 -14   2 74204.1 936.414   2
   1  14   2 76359.8 703.381   2
   1 -14   2 75187.5 987.872   3
   1 -14   3 349.492 338.682   2
   1  14   3 427.396 212.341   2
   1 -14   3 435.103 368.154   3
   1 -14   4 42846.9 834.127   3
   1 -14   4 41398.6 759.562   2
   1 -14   5 49673.4 911.477   3
   1 -14   6 39314.4 863.764   3
   1 -14   7 11082.8 604.757   3
   1 -14   8 1616.44 517.834   3
   1 -14   9 11851.7 673.405   3
   1 -14  10 396.194 513.424   3
   1 -14  11 101130. 1501.21   3
   1 -14  12 151.701 571.120   3
   1 -14  13-46.8683 662.681   3
   1 -14  14 2160.14 607.132   3
   1 -14  15 19696.9 912.192   3
   1 -14  16 1703.36 679.189   3
   1 -14  17 3696.90 737.934   3
   1 -14  18 5522.06 784.196   3
   1 -14  19 6695.10 834.037   3
   1 -14  20 4048.28 813.251   3
   1 -14  21 3242.21 802.245   3
   1 -14  22-83.3248 696.560   3
   1 -14  23 798.765 708.193   3
   1 -14  24 1987.95 795.767   3
  -1 -15  24 3521.49 825.475   3
  -1 -15  23 1170.93 683.355   3
  -1 -15  22 3080.33 726.564   3
  -1 -15  21 4350.18 827.092   3
  -1 -15  20 13820.6 972.822   3
  -1 -15  19 1818.62 651.939   3
  -1 -15  18 2626.48 739.206   3
  -1 -15  17 6832.43 751.185   3
  -1 -15  16 4408.15 730.620   3
  -1 -15  15 2082.22 600.147   3
  -1 -15  14 11032.1 809.645   3
  -1 -15  13 3253.61 719.384   3
  -1 -15  12 40612.2 1124.18   3
  -1 -15  11 46538.1 1136.79   3
  -1 -15  10 4997.60 639.342   3
  -1 -15   9 3672.27 555.467   3
  -1 -15   8 2403.47 548.070   3
  -1 -15   7 34538.7 918.173   3
  -1 -15   6 42019.7 954.749   3
  -1 -15   5 13648.5 660.430   3
  -1 -15   4 4599.36 568.906   3
  -1 -15   4 3421.58 271.412   2
  -1 -15   3 7391.65 298.663   2
  -1 -15   3 8748.03 593.034   3
   1 -15  -3 7685.07 443.690   3
  -1 -15   2 93529.4 745.717   2
   1 -15  -2 94791.7 1078.49   3
  -1 -15   2 94417.7 1233.61   3
   1 -15  -1 76889.1 998.260   2
   1 -15  -1 75329.9 985.623   3
  -1 -15   1 76332.6 1133.49   3
   1 -15   0 68378.4 930.858   2
  -1 -15   0 65788.9 1057.02   3
   1 -15   0 69382.0 964.591   3
   1 -15   1 1116.06 394.902   2
   1 -15   1 633.350 391.541   3
   1 -15   2 37121.4 782.334   3
   1 -15   2 36197.9 727.701   2
   1  15   2 37300.5 530.032   2
   1 -15   3 33419.0 713.054   2
   1 -15   3 34100.6 764.444   3
   1 -15   4 107285. 1283.88   3
   1 -15   4 107176. 1154.91   2
   1 -15   5 30627.0 800.714   3
   1 -15   6 115.623 443.087   3
   1 -15   7 11999.4 634.220   3
   1 -15   8 17479.1 724.304   3
   1 -15   9 11547.3 679.293   3
   1 -15  10 3960.99 598.857   3
   1 -15  11 3720.87 652.707   3
   1 -15  12 29358.4 966.739   3
   1 -15  13-192.167 665.016   3
   1 -15  14 171.653 599.804   3
   1 -15  15 1162.29 586.959   3
   1 -15  16 5117.30 712.525   3
   1 -15  17 3149.80 720.070   3
   1 -15  18 10010.6 868.700   3
   1 -15  19 2151.69 764.802   3
   1 -15  20 2017.35 797.782   3
   1 -15  21-124.675 757.441   3
   1 -15  22 6419.47 876.732   3
   1 -15  23 401.930 685.512   3
  -1 -16  23 483.319 743.967   3
  -1 -16  22 2669.35 738.101   3
  -1 -16  21 383.592 720.776   3
  -1 -16  20 361.219 768.122   3
  -1 -16  19 677.314 683.861   3
  -1 -16  18 10818.1 863.228   3
  -1 -16  17 110.006 667.862   3
  -1 -16  16 687.459 641.378   3
  -1 -16  15 851.216 638.692   3
  -1 -16  14 11353.8 838.253   3
  -1 -16  13 953.588 650.181   3
  -1 -16  12 918.287 634.553   3
  -1 -16  11 2841.30 655.220   3
  -1 -16  10 36125.6 1040.98   3
  -1 -16   9 1433.91 611.075   3
  -1 -16   8 101.672 505.180   3
  -1 -16   7 10104.1 676.316   3
  -1 -16   6 25677.5 847.961   3
  -1 -16   5 2663.00 294.918   2
  -1 -16   5 2561.98 532.524   3
  -1 -16   4 106927. 1375.14   3
  -1 -16   4 104854. 875.465   2
  -1 -16   3 27747.2 472.424   2
  -1 -16   3 26812.1 801.971   3
   1 -16  -3 27218.0 675.489   3
  -1 -16   2 11749.9 349.378   2
   1 -16  -2 11532.4 517.135   3
  -1 -16   2 13122.6 683.849   3
   1 -16  -1 1349.59 424.048   2
  -1 -16   1 1912.32 538.190   3
   1 -16  -1 1162.71 402.348   3
   1 -16   0 124142. 1295.74   3
   1 -16   0 125167. 1247.95   2
  -1 -16   0 126314. 1444.71   3
   1 -16   1 7717.96 492.191   3
   1 -16   1 7901.46 472.060   2
   1  16   2 47524.9 615.411   2
   1 -16   2 47226.4 890.548   3
   1 -16   2 45446.9 809.176   2
   1 -16   3 687.082 391.292   2
   1 -16   3 791.451 445.233   3
   1 -16   4 31282.9 719.704   2
   1 -16   4 32015.8 804.762   3
   1 -16   5 20320.5 711.153   3
   1 -16   5 20369.6 626.886   2
   1 -16   6 80912.7 1226.41   3
   1 -16   7 12515.8 674.565   3
   1 -16   8 4574.11 600.365   3
   1 -16   9 435.666 547.155   3
   1 -16  10 41917.7 1062.07   3
   1 -16  11 2881.56 655.168   3
   1 -16  12 2842.24 607.978   3
   1 -16  13 154.141 648.202   3
   1 -16  14 17882.1 895.046   3
   1 -16  15 3337.83 618.711   3
   1 -16  16 2339.44 672.596   3
   1 -16  17 360.611 683.130   3
   1 -16  18 5677.67 824.182   3
   1 -16  19 551.634 743.964   3
   1 -16  20 8687.31 944.979   3
   1 -16  21 693.829 800.686   3
   1 -16  22 999.103 810.400   3
   1 -16  23 379.675 751.304   3
  -1 -17  23 312.215 793.272   3
  -1 -17  22 4305.58 825.823   3
  -1 -17  21 1674.92 694.431   3
  -1 -17  20 4443.61 815.994   3
  -1 -17  19 853.239 746.301   3
  -1 -17  18 357.215 620.845   3
  -1 -17  17 1234.14 715.680   3
  -1 -17  16 14161.4 850.824   3
  -1 -17  15 3275.49 742.759   3
  -1 -17  14 658.258 626.650   3
  -1 -17  13-123.646 551.375   3
  -1 -17  12 5415.09 669.071   3
  -1 -17  11 16564.6 863.018   3
  -1 -17  10 33916.6 1029.45   3
  -1 -17   9 51365.0 1152.28   3
  -1 -17   8 28574.2 941.753   3
  -1 -17   7 1865.95 555.139   3
  -1 -17   6 9328.20 680.514   3
  -1 -17   5 405.026 264.167   2
  -1 -17   5 650.015 484.927   3
  -1 -17   4 3134.73 571.888   3
   1 -17  -4 3466.63 439.394   3
  -1 -17   4 2306.47 277.437   2
   1 -17  -3 6102.02 471.620   3
  -1 -17   3 6706.31 619.646   3
  -1 -17   3 5254.82 306.653   2
  -1 -17   2 114646. 1451.16   3
   1 -17  -2 116228. 1283.71   3
  -1 -17   2 118072. 898.513   2
   1 -17  -1 23146.8 662.552   3
  -1 -17   1 23935.2 811.237   3
  -1 -17   0 10385.3 662.249   3
   1 -17   0 9421.71 545.530   3
   1 -17   0 10212.4 532.403   2
   1 -17   1 1225.93 399.466   2
   1 -17   1 1697.79 450.369   3
  -1 -17  -1 1740.94 536.117   3
   1 -17   2 51510.6 958.011   3
   1 -17   2 52499.6 881.374   2
   1 -17   3 6721.95 474.422   2
   1 -17   3 7460.96 544.401   3
   1 -17   4 41891.7 914.070   3
   1 -17   4 40615.2 810.590   2
   1 -17   5 1038.62 506.224   3
   1 -17   5 1365.64 433.062   2
   1 -17   6 2548.05 560.662   3
   1 -17   7 31756.8 904.131   3
   1 -17   8 55318.7 1143.90   3
   1 -17   9 5904.28 674.993   3
   1 -17  10 1261.03 579.362   3
   1 -17  11 293.243 608.648   3
   1 -17  12 11315.5 791.898   3
   1 -17  13 11477.4 819.875   3
   1 -17  14 15553.3 847.362   3
   1 -17  15 1098.59 639.284   3
   1 -17  16 5344.78 771.067   3
   1 -17  17 1988.62 742.580   3
   1 -17  18 4874.42 814.528   3
   1 -17  19 681.588 763.820   3
   1 -17  20 131.160 775.182   3
   1 -17  21 278.929 805.856   3
   1 -17  22 9409.18 1005.36   3
  -1 -18  22 1686.94 847.540   3
  -1 -18  21 414.063 738.881   3
  -1 -18  20 1910.84 694.569   3
  -1 -18  19 6141.52 855.292   3
  -1 -18  18 668.310 728.129   3
  -1 -18  17 3812.67 727.489   3
  -1 -18  16 564.862 685.577   3
  -1 -18  15 12615.9 856.463   3
  -1 -18  14 13343.9 857.337   3
  -1 -18  13 19334.3 949.704   3
  -1 -18  12 76.4036 633.313   3
  -1 -18  11 803.273 643.213   3
  -1 -18  10 24466.8 977.244   3
  -1 -18   9 112958. 1665.44   3
  -1 -18   8 352.683 619.476   3
  -1 -18   7 9170.99 664.245   3
  -1 -18   6 891.643 282.946   2
  -1 -18   6 753.549 558.346   3
  -1 -18   5 231.813 515.737   3
  -1 -18   5 121.112 253.696   2
   1 -18  -4 35040.7 803.917   3
  -1 -18   4 34513.6 943.153   3
  -1 -18   4 34610.7 566.287   2
  -1 -18   3 29413.0 515.494   2
   1 -18  -3 29962.4 760.723   3
  -1 -18   3 29621.7 863.816   3
   1 -18  -2 2533.24 452.442   3
  -1 -18   2 2897.43 561.509   3
   1 -18  -1 3087.74 462.184   3
  -1 -18   1 3252.62 572.983   3
  -1 -18   0 9378.69 641.982   3
   1 -18   0 10189.2 529.285   2
   1 -18   0 9772.32 551.536   3
   1 -18   1 16509.0 599.906   2
  -1 -18  -1 17341.0 724.523   3
   1 -18   1 17806.9 652.534   3
   1 -18   2 14420.1 645.164   3
   1 -18   2 15062.4 589.569   2
   1 -18   3 1723.21 437.206   2
   1 -18   3 1727.60 482.987   3
   1 -18   4 34460.9 785.937   2
   1 -18   4 32927.2 875.443   3
   1 -18   5 41749.0 860.521   2
   1 -18   5 42157.9 977.024   3
   1 -18   6 2213.51 439.731   2
   1 -18   6 1986.83 502.200   3
   1 -18   7 2571.28 558.213   3
   1 -18   8 7440.95 647.864   3
   1 -18   9 51404.8 1168.06   3
   1 -18  10 26310.7 973.805   3
   1 -18  11 30614.9 1003.80   3
   1 -18  12 3745.65 700.551   3
   1 -18  13 165.512 564.968   3
   1 -18  14 4215.03 690.544   3
   1 -18  15 8930.19 834.738   3
   1 -18  16 1586.99 713.887   3
   1 -18  17 1025.08 697.780   3
   1 -18  18 597.016 701.071   3
   1 -18  19 2770.64 748.286   3
   1 -18  20 1843.13 725.245   3
   1 -18  21 3125.94 787.543   3
   1 -18  22 959.486 796.881   3
  -1 -19  22 1513.44 744.690   3
  -1 -19  21 4550.26 891.475   3
  -1 -19  20 670.591 784.105   3
  -1 -19  19 374.715 659.189   3
  -1 -19  18 352.638 731.926   3
  -1 -19  17 7745.66 850.754   3
  -1 -19  16 3465.16 722.264   3
  -1 -19  15 19550.5 993.045   3
  -1 -19  14 2720.71 717.814   3
  -1 -19  13 2633.59 620.271   3
  -1 -19  12 357.993 617.652   3
  -1 -19  11 37409.7 1139.22   3
  -1 -19  10 11452.5 821.040   3
  -1 -19   9 29512.4 1056.38   3
  -1 -19   8 3602.65 682.305   3
  -1 -19   7 13371.5 748.327   3
  -1 -19   6 328.451 535.096   3
  -1 -19   6 360.460 273.756   2
  -1 -19   5 7165.30 682.338   3
  -1 -19   5 6780.32 355.423   2
   1 -19  -5 7277.25 531.545   3
   1 -19  -4 8010.53 531.888   3
  -1 -19   4 6671.38 343.114   2
  -1 -19   4 7538.11 625.004   3
  -1 -19   3 368.975 262.827   2
   1 -19  -3 925.793 437.411   3
  -1 -19   3 441.631 563.755   3
   1 -19  -2 1372.11 432.523   3
  -1 -19   2 1549.87 518.981   3
  -1 -19   1 2193.63 588.394   3
   1 -19  -1 1658.08 452.313   3
  -1 -19   0 943.135 510.720   3
   1 -19   0 794.923 443.181   3
   1 -19   0 943.625 429.524   2
   1 -19   1 997.688 463.951   3
   1 -19   1 453.892 429.503   2
  -1 -19  -1 676.345 547.357   3
   1 -19   2 6005.45 505.446   2
   1 -19   2 6396.66 541.889   3
   1 -19   3 97133.0 1357.91   3
   1 -19   3 95474.5 1200.55   2
   1 -19   4 1978.17 462.563   2
   1 -19   4 2436.12 549.813   3
   1 -19   5 479.730 436.916   2
   1 -19   5 474.692 522.791   3
   1 -19   6 1109.68 452.957   2
   1 -19   6 813.024 523.130   3
   1 -19   7 68502.4 1103.95   2
   1 -19   7 70456.6 1294.09   3
   1 -19   8 6692.20 695.949   3
   1 -19   9 50624.2 1200.47   3
   1 -19  10 440.519 566.938   3
   1 -19  11 7829.85 762.491   3
   1 -19  12-109.915 572.060   3
   1 -19  13 24299.4 1004.84   3
   1 -19  14 4468.79 737.553   3
   1 -19  15 1840.94 685.013   3
   1 -19  16 104.204 580.196   3
   1 -19  17 3579.12 696.536   3
   1 -19  18 1454.89 688.267   3
   1 -19  19 6721.75 842.021   3
   1 -19  20 1056.64 723.661   3
   1 -19  21 4911.20 817.790   3
  -1 -20  21-67.3967 678.377   3
  -1 -20  20 660.930 752.117   3
  -1 -20  19 9976.43 973.152   3
  -1 -20  18 1108.37 694.521   3
  -1 -20  17 4467.40 808.717   3
  -1 -20  16 2022.76 730.693   3
  -1 -20  15 9241.84 832.382   3
  -1 -20  14 920.393 671.305   3
  -1 -20  13 17858.0 969.270   3
  -1 -20  12 2684.59 631.266   3
  -1 -20  11 273.319 588.472   3
  -1 -20  10 676.069 640.148   3
  -1 -20   9 71280.4 1423.70   3
  -1 -20   8 730.297 653.413   3
  -1 -20   7 16539.4 499.625   2
  -1 -20   7 17367.9 836.269   3
  -1 -20   6 565.665 286.388   2
  -1 -20   6 403.747 533.793   3
   1 -20  -5 1914.25 446.818   3
  -1 -20   5 2066.67 565.451   3
  -1 -20   5 1386.95 299.625   2
  -1 -20   4 29475.8 556.477   2
   1 -20  -4 30470.2 810.732   3
  -1 -20   4 31508.9 974.526   3
   1 -20  -3 13986.5 628.888   3
  -1 -20   3 14410.6 422.035   2
  -1 -20   3 15922.8 775.017   3
   1 -20  -2 876.661 448.896   3
  -1 -20   2 654.366 533.009   3
   1 -20  -1 36901.4 882.854   3
  -1 -20   1 36236.7 1004.66   3
   1 -20   0 6604.54 526.261   2
  -1 -20   0 6790.53 624.518   3
   1 -20   0 7858.10 575.223   3
   1 -20   1 36670.9 895.420   3
   1 -20   1 38090.8 839.502   2
  -1 -20  -1 37796.5 1002.92   3
  -1 -20  -2 872.986 581.870   3
   1 -20   2-223.717 419.209   2
   1 -20   2 469.276 463.820   3
   1 -20   3 16008.7 640.055   2
   1 -20   3 16585.3 740.297   3
   1 -20   4 8337.53 549.160   2
   1 -20   4 8581.71 671.752   3
   1 -20   5 47816.4 1088.65   3
   1 -20   5 45626.8 924.942   2
   1 -20   6 347.590 549.115   3
   1 -20   6 192.662 451.247   2
   1 -20   7 30429.3 977.964   3
   1 -20   7 29032.7 801.817   2
   1 -20   8 1719.01 598.926   3
   1 -20   9 24087.3 915.008   3
   1 -20  10 1141.06 644.196   3
   1 -20  11 20622.5 914.970   3
   1 -20  12 1831.35 659.084   3
   1 -20  13-67.9135 650.335   3
   1 -20  14 1769.96 614.476   3
   1 -20  15 12349.2 880.278   3
   1 -20  16-151.982 696.527   3
   1 -20  17 978.952 759.634   3
   1 -20  18 1939.93 830.742   3
   1 -20  19 2515.50 857.807   3
   1 -20  20 1312.89 828.318   3
   1 -20  21 3726.76 891.103   3
  -1 -21  21 2992.53 886.745   3
  -1 -21  20 4196.86 882.174   3
  -1 -21  19 713.887 704.486   3
  -1 -21  18 494.520 758.575   3
  -1 -21  17 3558.87 801.845   3
  -1 -21  16 2584.13 675.241   3
  -1 -21  15 1180.13 728.580   3
  -1 -21  14 1463.62 630.081   3
  -1 -21  13 1386.15 690.029   3
  -1 -21  12 720.556 664.395   3
  -1 -21  11 4609.72 651.693   3
  -1 -21  10 735.745 602.651   3
  -1 -21   9 2985.00 701.483   3
  -1 -21   8 9441.63 460.657   2
  -1 -21   8 8881.70 779.809   3
  -1 -21   7 17229.3 527.337   2
  -1 -21   7 18554.8 900.902   3
   1 -21  -6 16710.7 692.630   3
  -1 -21   6 15012.0 480.132   2
  -1 -21   6 15717.4 843.180   3
  -1 -21   5 477.878 286.456   2
   1 -21  -5 854.874 468.328   3
  -1 -21   5 919.179 586.137   3
  -1 -21   4 5616.06 624.549   3
   1 -21  -4 6191.12 544.202   3
  -1 -21   4 5760.13 342.891   2
  -1 -21   3 12575.9 722.655   3
   1 -21  -3 13208.2 657.093   3
  -1 -21   2 4877.23 655.152   3
   1 -21  -2 5185.43 544.578   3
  -1 -21   1 48487.9 1150.36   3
   1 -21  -1 47148.8 1004.13   3
   1 -21   0 22482.8 781.592   3
  -1 -21   0 23018.8 886.997   3
   1 -21   1 6993.25 598.123   3
   1 -21   1 6035.80 525.123   2
  -1 -21  -1 7273.58 659.770   3
   1 -21   2 12616.7 693.470   3
   1 -21   2 13205.1 615.644   2
  -1 -21  -2 12561.6 737.879   3
   1 -21   3 323.868 454.378   2
   1 -21   3 827.035 533.880   3
   1 -21   4 46204.8 1079.08   3
   1 -21   4 46786.7 942.182   2
   1 -21   5 1937.06 599.753   3
   1 -21   5 1045.35 463.863   2
   1 -21   6 469.021 460.112   2
   1 -21   6 1438.51 599.059   3
   1 -21   7 20432.3 716.651   2
   1 -21   7 21814.3 895.780   3
   1 -21   8 24334.6 911.521   3
   1 -21   8 24750.3 784.630   2
   1 -21   9 5546.12 708.817   3
   1 -21  10 730.967 550.943   3
   1 -21  11 1015.90 655.777   3
   1 -21  12 1977.46 604.572   3
   1 -21  13 7230.61 758.524   3
   1 -21  14 452.627 686.492   3
   1 -21  15 381.143 702.215   3
   1 -21  16 4769.49 778.212   3
   1 -21  17 3616.36 730.689   3
   1 -21  18 2389.01 714.584   3
   1 -21  19 3721.06 745.574   3
   1 -21  20 682.163 686.291   3
  -1 -22  20 551.730 745.813   3
  -1 -22  19 1310.37 842.796   3
  -1 -22  18 9672.66 959.747   3
  -1 -22  17 264.721 644.368   3
  -1 -22  16 1566.42 773.539   3
  -1 -22  15 764.593 647.619   3
  -1 -22  14 2421.05 737.668   3
  -1 -22  13 1150.14 622.258   3
  -1 -22  12 3743.74 758.076   3
  -1 -22  11 6632.67 728.304   3
  -1 -22  10 5701.23 692.048   3
  -1 -22   9 1603.21 675.558   3
  -1 -22   8 9104.35 792.560   3
  -1 -22   7 1043.80 653.517   3
   1 -22  -7 191.183 457.211   3
  -1 -22   6 12615.7 821.213   3
   1 -22  -6 13361.2 661.444   3
   1 -22  -5 44972.1 1006.62   3
  -1 -22   5 47103.2 1188.12   3
   1 -22  -4 9151.79 597.277   3
  -1 -22   4 8710.20 389.603   2
  -1 -22   4 9023.23 738.342   3
  -1 -22   3 397.315 610.262   3
   1 -22  -3 416.142 466.197   3
   1 -22  -2 1707.68 516.828   3
  -1 -22   2 1851.37 643.061   3
   1 -22  -1 5109.95 580.465   3
  -1 -22   1 6162.03 716.305   3
  -1 -22   0 64119.9 1310.75   3
   1 -22   0 63080.1 1169.65   3
   1 -22   1 15834.1 733.086   3
  -1 -22  -1 16047.5 825.601   3
   1 -22   1 16805.2 672.244   2
   1 -22   2 21024.9 708.238   2
   1 -22   2 21325.9 820.179   3
  -1 -22  -2 22176.5 912.255   3
   1 -22   3 22417.9 727.839   2
   1 -22   3 23039.0 840.896   3
  -1 -22  -3 22028.3 909.131   3
   1 -22   4 8816.28 573.616   2
   1 -22   4 8503.14 662.981   3
   1 -22   5 7376.56 690.896   3
   1 -22   5 8408.37 555.768   2
   1 -22   6 58233.2 1271.35   3
   1 -22   6 56478.9 1053.50   2
   1 -22   7 183.877 555.629   3
   1 -22   7 382.991 457.262   2
   1 -22   8 283.985 447.938   2
   1 -22   8 290.095 569.998   3
   1 -22   9 178.057 610.122   3
   1 -22   9 468.046 452.482   2
   1 -22  10 7219.25 714.627   3
   1 -22  11 692.411 603.609   3
   1 -22  12 652.999 657.470   3
   1 -22  13 64.2818 607.878   3
   1 -22  14 8998.01 792.117   3
   1 -22  15 163.237 672.116   3
   1 -22  16 2123.50 791.266   3
   1 -22  17 107.615 799.437   3
   1 -22  18 3714.83 880.102   3
   1 -22  19 458.635 796.417   3
   1 -22  20 5944.29 954.894   3
  -1 -23  19 1037.49 781.568   3
  -1 -23  18 1532.18 702.133   3
  -1 -23  17 433.622 789.960   3
  -1 -23  16 6059.45 864.111   3
  -1 -23  15 3626.23 731.016   3
  -1 -23  14 2499.24 771.131   3
  -1 -23  13 273.927 597.977   3
  -1 -23  12 13728.1 928.883   3
  -1 -23  11 1796.29 641.497   3
  -1 -23  10 686.123 609.147   3
  -1 -23   9 1043.55 686.984   3
  -1 -23   8 878.741 654.674   3
   1 -23  -7 185.624 453.576   3
  -1 -23   7 271.602 565.047   3
  -1 -23   6 43727.8 1170.73   3
   1 -23  -6 44585.2 1049.10   3
  -1 -23   5 8960.08 750.147   3
   1 -23  -5 10196.0 643.457   3
   1 -23  -4 5470.56 564.177   3
  -1 -23   4 5655.94 686.320   3
  -1 -23   3 1837.69 648.579   3
   1 -23  -3 1999.31 505.696   3
   1 -23  -2 60710.7 1178.64   3
  -1 -23   2 59969.6 1320.40   3
  -1 -23   1 12871.8 824.701   3
   1 -23  -1 12762.4 707.857   3
  -1 -23   0 30029.3 1027.08   3
   1 -23   0 31726.8 939.506   3
   1 -23   1 6869.81 649.346   3
  -1 -23  -1 7964.70 746.430   3
   1 -23   1 7717.35 557.272   2
   1 -23   2 10040.8 597.293   2
   1 -23   2 10684.8 715.733   3
  -1 -23  -2 10386.0 756.230   3
   1 -23   3 5575.44 524.198   2
  -1 -23  -3 6069.65 673.457   3
   1 -23   3 6339.80 653.534   3
   1 -23   4 30146.4 826.356   2
   1 -23   4 30741.8 963.897   3
  -1 -23  -4 31896.1 1034.44   3
   1 -23   5 4516.00 634.557   3
   1 -23   5 4611.75 525.240   2
   1 -23   6 375.717 462.656   2
   1 -23   6 1060.35 617.653   3
   1 -23   7 631.252 552.244   3
   1 -23   7 502.928 444.134   2
   1 -23   8 9121.98 748.643   3
   1 -23   8 8234.27 592.964   2
   1 -23   9 1085.89 474.675   2
   1 -23   9 1650.33 605.263   3
   1 -23  10 6201.63 570.845   2
   1 -23  10 7277.00 769.974   3
   1 -23  11 1705.86 617.503   3
   1 -23  12 14982.2 911.025   3
   1 -23  13 3484.17 757.990   3
   1 -23  14 2334.24 747.047   3
   1 -23  15 117.271 651.561   3
   1 -23  16 276.890 657.709   3
   1 -23  17 1684.21 679.845   3
   1 -23  18 9936.73 921.018   3
   1 -23  19 355.933 716.254   3
  -1 -24  19 804.699 698.989   3
  -1 -24  18 7160.46 941.954   3
  -1 -24  17 4394.54 904.205   3
  -1 -24  16 393.934 689.573   3
  -1 -24  15 1645.88 755.077   3
  -1 -24  14 5615.12 842.783   3
  -1 -24  13 12769.0 886.457   3
  -1 -24  12 646.734 717.049   3
  -1 -24  11 439.475 606.119   3
  -1 -24  10 6155.53 768.790   3
  -1 -24   9 5741.87 768.611   3
   1 -24  -8 9404.07 647.427   3
  -1 -24   8 8557.14 733.588   3
   1 -24  -7 2304.53 529.786   3
  -1 -24   7 2424.93 696.854   3
   1 -24  -6 2900.70 532.623   3
  -1 -24   6 3667.03 720.547   3
   1 -24  -5 104.614 481.303   3
  -1 -24   5 236.540 621.171   3
  -1 -24   4 12541.0 784.046   3
   1 -24  -4 12979.5 699.817   3
   1 -24  -3 7631.75 618.996   3
  -1 -24   3 6320.55 680.675   3
   1 -24  -2 8866.31 648.153   3
  -1 -24   2 8384.98 758.773   3
  -1 -24   1 1962.33 663.977   3
   1 -24  -1 2028.70 552.205   3
  -1 -24   0 25464.3 976.092   3
   1 -24   0 24336.3 876.299   3
  -1 -24  -1 2430.33 601.903   3
   1 -24   1 3210.81 579.736   3
  -1 -24  -2 3045.76 626.741   3
   1 -24   2 2668.57 566.809   3
   1 -24   2 2255.13 479.361   2
  -1 -24  -3 7563.66 743.441   3
   1 -24   3 6591.60 665.375   3
   1 -24   3 6070.83 539.995   2
  -1 -24  -4 599.165 581.572   3
   1 -24   4 160.147 444.156   2
   1 -24   4 1477.35 618.321   3
   1 -24   5 12055.6 756.392   3
   1 -24   5 12007.1 632.104   2
   1 -24   6 9897.50 754.877   3
   1 -24   6 8396.43 579.081   2
   1 -24   7-155.144 445.965   2
   1 -24   7 215.594 555.451   3
   1 -24   8 177.476 443.965   2
   1 -24   8 474.494 599.608   3
   1 -24   9 7261.47 711.383   3
   1 -24   9 7560.73 574.060   2
   1 -24  10 7884.48 795.802   3
   1 -24  10 7788.94 615.483   2
   1 -24  11 9893.87 801.912   3
   1 -24  11 9617.65 647.262   2
   1 -24  12 3335.51 649.810   3
   1 -24  13 2951.98 747.950   3
   1 -24  14 3538.30 815.855   3
   1 -24  15 4011.73 840.230   3
   1 -24  16 4630.24 848.627   3
   1 -24  17 3533.08 845.558   3
   1 -24  18 1143.33 770.103   3
  -1 -25  18 1183.71 847.054   3
  -1 -25  17 6212.86 901.741   3
  -1 -25  16 2638.24 732.335   3
  -1 -25  15 10602.8 974.257   3
  -1 -25  14 426.712 752.195   3
  -1 -25  13 913.452 663.517   3
  -1 -25  12 3759.50 811.128   3
  -1 -25  11 13664.9 883.317   3
  -1 -25  10 5815.29 800.633   3
   1 -25  -9 2452.44 528.344   3
  -1 -25   9 2694.78 634.662   3
  -1 -25   8 617.364 668.409   3
   1 -25  -8 544.108 510.063   3
   1 -25  -7 8646.26 656.878   3
  -1 -25   7 10219.3 831.755   3
   1 -25  -6 1233.64 513.002   3
  -1 -25   6 910.950 592.293   3
   1 -25  -5 5972.69 600.231   3
  -1 -25   5 5804.75 739.379   3
  -1 -25   4 953.235 643.590   3
   1 -25  -4 556.402 509.928   3
   1 -25  -3 2069.52 529.071   3
  -1 -25   3 1640.06 590.599   3
   1 -25  -2 727.773 509.289   3
  -1 -25   2 786.182 614.510   3
  -1 -25   1 13141.1 846.880   3
   1 -25  -1 12056.6 721.796   3
   1 -25   0 10991.5 713.704   3
  -1 -25   0 11389.2 784.634   3
  -1 -25  -1 15718.7 851.606   3
   1 -25   1 16122.2 788.171   3
   1 -25   2 2804.17 491.818   2
  -1 -25  -2 2019.01 680.979   3
   1 -25   2 2609.80 606.120   3
   1 -25   3 24438.8 776.126   2
  -1 -25  -3 22486.9 946.746   3
   1 -25   3 25570.5 947.305   3
   1 -25   4 14547.9 660.808   2
  -1 -25  -4 15544.8 888.221   3
   1 -25   4 15160.9 803.937   3
   1 -25   5 3382.31 647.135   3
   1 -25   5 2729.25 492.650   2
  -1 -25  -5 2602.22 636.273   3
   1 -25   6 472.067 443.156   2
   1 -25   6 310.281 540.713   3
   1 -25   7 18478.6 916.046   3
   1 -25   7 17940.9 731.464   2
   1 -25   8 5686.68 702.797   3
   1 -25   8 4734.69 544.674   2
   1 -25   9 5411.12 544.335   2
   1 -25   9 6169.64 699.304   3
   1 -25  10 1989.67 698.990   3
   1 -25  10 1756.06 501.694   2
   1 -25  11 4055.55 750.708   3
   1 -25  11 3687.86 562.509   2
   1 -25  12 2106.60 557.775   2
   1 -25  12 1888.30 649.906   3
   1 -25  13 13163.7 759.541   2
   1 -25  13 12707.2 900.756   3
   1 -25  14 3349.07 793.759   3
   1 -25  15 775.556 790.101   3
   1 -25  16 949.938 825.414   3
   1 -25  17 8114.84 987.171   3
   1 -25  18 2237.99 864.746   3
  -1 -26  17 3452.13 813.180   3
  -1 -26  16 1224.88 723.068   3
  -1 -26  15 5494.05 910.073   3
  -1 -26  14 1342.72 785.023   3
  -1 -26  13 13064.0 920.818   3
  -1 -26  12 1115.57 763.829   3
  -1 -26  11 174.738 642.052   3
  -1 -26  10 212.529 704.151   3
   1 -26 -10-153.395 493.791   3
  -1 -26   9 8326.80 807.808   3
   1 -26  -9 7823.11 652.650   3
  -1 -26   8 332.604 657.552   3
   1 -26  -8-1.84955 504.394   3
  -1 -26   7 2209.76 644.855   3
   1 -26  -7 1741.76 533.695   3
  -1 -26   6-151.703 658.634   3
   1 -26  -6 73.8596 490.871   3
  -1 -26   5 3121.79 655.366   3
   1 -26  -5 3084.69 575.671   3
  -1 -26   4 5752.85 756.435   3
   1 -26  -4 5628.31 614.704   3
  -1 -26   3 26232.9 1034.92   3
   1 -26  -3 27033.5 936.473   3
   1 -26  -2 269.657 505.423   3
  -1 -26   2 177.495 580.340   3
  -1 -26   1 4696.61 718.648   3
   1 -26  -1 5492.88 633.406   3
   1 -26   0 813.061 523.971   3
  -1 -26   0 1013.33 571.603   3
   1 -26   1 10584.9 727.630   3
  -1 -26  -1 9830.78 808.058   3
  -1 -26  -2 6215.59 676.914   3
   1 -26   2 5589.49 668.168   3
   1 -26   3 3269.18 503.755   2
  -1 -26  -3 4068.77 719.864   3
   1 -26   3 3050.80 612.097   3
  -1 -26  -4 1426.14 600.262   3
   1 -26   4 644.898 446.459   2
   1 -26   4 2314.14 617.082   3
   1 -26   5 18892.7 895.659   3
   1 -26   5 19722.1 742.407   2
  -1 -26  -5 19973.2 924.206   3
  -1 -26  -6 194.759 631.444   3
   1 -26   6 761.595 451.483   2
   1 -26   6 754.433 579.418   3
   1 -26   7 3792.26 520.258   2
   1 -26   7 4197.31 702.993   3
   1 -26   8 693.184 446.455   2
   1 -26   8 920.674 567.074   3
   1 -26   9 3198.30 682.317   3
   1 -26   9 3167.11 515.946   2
   1 -26  10 155.140 472.359   2
   1 -26  10 340.371 669.299   3
   1 -26  11 13426.8 916.188   3
   1 -26  12 978.688 652.306   3
   1 -26  13 1835.47 676.439   3
   1 -26  14-82.5649 694.296   3
   1 -26  15 8280.13 928.821   3
   1 -26  16 326.408 772.621   3
   1 -26  17 1227.61 833.642   3
  -1 -27  16 249.579 692.749   3
  -1 -27  15 3440.13 864.132   3
  -1 -27  14 1607.13 822.208   3
  -1 -27  13 1648.41 665.709   3
  -1 -27  12 267.625 730.303   3
  -1 -27  11 3935.58 825.146   3
   1 -27 -10 210.761 521.763   3
  -1 -27  10 37.0178 615.169   3
   1 -27  -9 321.887 506.683   3
  -1 -27   9 437.529 734.354   3
   1 -27  -8 332.239 517.616   3
  -1 -27   8 246.504 591.763   3
  -1 -27   7 6721.16 809.404   3
   1 -27  -7 6749.42 658.310   3
  -1 -27   6 2813.32 665.699   3
   1 -27  -6 2867.82 586.733   3
  -1 -27   5 6456.81 788.955   3
   1 -27  -5 6773.20 642.783   3
   1 -27  -4 2579.68 583.590   3
  -1 -27   4 2283.92 639.554   3
  -1 -27   3 12123.7 869.257   3
   1 -27  -3 11311.4 734.083   3
   1 -27  -2 6248.37 640.684   3
  -1 -27   2 6246.04 693.975   3
   1 -27  -1 3572.65 616.476   3
  -1 -27   1 3281.17 710.439   3
  -1 -27   0 1658.85 606.908   3
   1 -27   0 1866.74 558.127   3
  -1 -27  -1 214.626 631.481   3
   1 -27   1 595.514 571.108   3
   1 -27   2 5020.64 644.654   3
  -1 -27  -2 5699.83 734.312   3
   1 -27   3 22722.6 777.960   2
  -1 -27  -3 22365.2 972.629   3
   1 -27   3 21958.4 949.175   3
   1 -27   4 6855.20 703.773   3
  -1 -27  -4 7384.97 766.874   3
  -1 -27  -5 1860.76 678.475   3
   1 -27   5 2049.92 622.522   3
  -1 -27  -6 188.326 631.132   3
   1 -27   6 286.892 622.693   3
  -1 -27  -7 2793.51 688.279   3
   1 -27   7 2680.17 648.114   3
   1 -27   8 4931.91 678.747   3
   1 -27   9 4384.12 753.117   3
   1 -27  10 358.662 694.807   3
   1 -27  11 2217.99 725.999   3
   1 -27  12 609.147 628.038   3
   1 -27  13 7420.92 824.001   3
   1 -27  14 128.492 678.783   3
   1 -27  15-94.5833 706.219   3
   1 -27  16 4295.28 851.288   3
  -1 -28  15 1182.39 792.720   3
  -1 -28  14 1737.34 825.115   3
  -1 -28  13 595.673 732.317   3
  -1 -28  12 2057.99 715.391   3
  -1 -28  11 2288.64 812.663   3
  -1 -28  10 2586.14 771.760   3
  -1 -28   9 1589.74 657.979   3
   1 -28  -9 1095.00 561.240   3
   1 -28  -8 1045.57 539.575   3
  -1 -28   8 1682.02 766.562   3
   1 -28  -7 1673.69 561.898   3
  -1 -28   7 2173.70 683.016   3
  -1 -28   6 364.236 670.769   3
   1 -28  -6 715.647 546.830   3
   1 -28  -5 1416.84 585.223   3
  -1 -28   5 1935.06 714.643   3
   1 -28  -4 24986.3 957.425   3
  -1 -28   4 25880.2 1055.28   3
  -1 -28   3 11832.2 890.569   3
   1 -28  -3 12357.7 773.684   3
   1 -28  -2 337.113 541.194   3
  -1 -28   2 299.826 576.373   3
   1 -28  -1 258.552 556.839   3
  -1 -28   1 878.933 666.272   3
   1 -28   0 8119.10 703.097   3
  -1 -28   0 7883.23 788.580   3
  -1 -28  -1 4519.55 675.234   3
   1 -28   1 4753.31 673.393   3
  -1 -28  -2 15386.9 930.037   3
   1 -28   2 15512.7 858.779   3
   1 -28   3 877.458 589.673   3
  -1 -28  -3 886.893 685.490   3
  -1 -28  -4 5778.65 732.943   3
   1 -28   4 6387.15 756.543   3
  -1 -28  -5 2461.45 640.301   3
   1 -28   5 1983.93 666.972   3
   1 -28   6 7534.44 736.661   3
  -1 -28  -6 8499.58 767.657   3
  -1 -28  -7 5592.19 718.366   3
   1 -28   7 5352.86 713.218   3
  -1 -28  -8 436.271 633.686   3
   1 -28   8 457.448 671.382   3
   1 -28   9-147.344 687.250   3
   1 -28  10 6766.28 805.933   3
   1 -28  11 1470.55 669.295   3
   1 -28  12 832.203 666.453   3
   1 -28  13 328.537 661.139   3
   1 -28  14 1266.00 716.621   3
   1 -28  15 1364.31 733.281   3
  -1 -29  14 967.535 809.931   3
  -1 -29  13 980.561 824.536   3
  -1 -29  12 2910.58 801.950   3
  -1 -29  11 1294.40 672.527   3
  -1 -29  10 4064.59 846.847   3
  -1 -29   9 4910.92 863.271   3
  -1 -29   8 6937.69 794.814   3
   1 -29  -8 6780.70 681.415   3
  -1 -29   7 409.399 708.699   3
   1 -29  -7 952.306 575.192   3
  -1 -29   6 14062.1 978.615   3
   1 -29  -6 14868.6 818.791   3
   1 -29  -5 318.630 559.336   3
  -1 -29   5 521.020 629.496   3
  -1 -29   4 1175.42 697.682   3
   1 -29  -4 955.704 573.805   3
   1 -29  -3 4947.84 641.514   3
  -1 -29   3 5325.42 788.737   3
   1 -29  -2 2730.18 629.020   3
  -1 -29   2 4435.65 701.171   3
  -1 -29   1 1308.28 678.653   3
   1 -29  -1 834.862 585.173   3
  -1 -29   0 1084.86 707.159   3
   1 -29   0 354.599 557.463   3
   1 -29   1 190.657 559.724   3
  -1 -29  -1 280.324 619.277   3
  -1 -29  -2 12882.3 860.231   3
   1 -29   2 13123.5 861.589   3
   1 -29   3 796.069 630.874   3
  -1 -29  -3 1461.00 670.273   3
  -1 -29  -4 12716.1 899.163   3
   1 -29   4 11452.0 816.519   3
  -1 -29  -5 779.649 683.326   3
   1 -29   5 777.388 607.607   3
  -1 -29  -6 427.615 679.882   3
   1 -29   6 645.295 671.937   3
  -1 -29  -7 1649.09 699.024   3
   1 -29   7 1515.64 707.182   3
  -1 -29  -8 14905.7 936.990   3
   1 -29   8 14194.4 939.150   3
   1 -29   9 388.930 646.881   3
  -1 -29  -9-109.257 672.049   3
   1 -29  10 1330.27 685.936   3
   1 -29  11 863.802 662.744   3
   1 -29  12 2088.86 712.359   3
   1 -29  13-172.944 711.612   3
   1 -29  14 2416.56 771.907   3
  -1 -30  13 1523.66 843.608   3
  -1 -30  12 773.480 827.785   3
  -1 -30  11 2671.10 842.923   3
  -1 -30  10 3918.69 763.041   3
  -1 -30   9 1693.80 741.845   3
  -1 -30   8 8112.94 932.374   3
   1 -30  -7 1123.06 587.031   3
  -1 -30   7 1844.88 796.362   3
  -1 -30   6 1010.30 663.528   3
   1 -30  -6 816.539 589.732   3
  -1 -30   5-5.26819 686.752   3
   1 -30  -5-10.7379 558.275   3
   1 -30  -4 4521.55 668.639   3
  -1 -30   4 4763.92 821.313   3
  -1 -30   3 600.212 682.386   3
   1 -30  -3 528.977 589.387   3
   1 -30  -2-105.691 583.286   3
  -1 -30   2 608.109 626.476   3
  -1 -30   1 262.870 642.431   3
   1 -30  -1 0.24806 576.918   3
  -1 -30   0 3269.32 757.307   3
   1 -30   0 3033.31 640.773   3
  -1 -30  -1 930.826 701.662   3
   1 -30   1-61.3551 573.445   3
  -1 -30  -2 8298.16 822.491   3
   1 -30   2 7572.81 748.781   3
   1 -30   3 2670.67 700.909   3
  -1 -30  -3 2338.93 697.618   3
   1 -30   4 1195.53 678.178   3
  -1 -30  -4 1475.45 660.456   3
   1 -30   5 2133.08 696.322   3
  -1 -30  -5 1799.74 696.713   3
  -1 -30  -6 10962.2 905.873   3
   1 -30   6 10938.1 842.079   3
   1 -30   7 185.955 631.854   3
  -1 -30  -7 825.245 720.242   3
   1 -30   8 822.518 644.723   3
  -1 -30  -8 1092.54 709.812   3
  -1 -30  -9 5569.90 780.872   3
   1 -30   9 5663.44 794.774   3
   1 -30  10 5907.82 831.194   3
  -1 -30 -10 5784.02 858.460   3
   1 -30  11 2956.46 811.090   3
   1 -30  12 4408.37 859.562   3
   1 -30  13 431.737 766.807   3
  -1 -31  11 6487.35 921.664   3
  -1 -31  10 1574.67 829.556   3
  -1 -31   9 2121.78 837.923   3
  -1 -31   8 177.829 728.596   3
  -1 -31   7 4348.36 766.649   3
  -1 -31   6 3189.90 784.827   3
   1 -31  -6 4098.61 660.749   3
   1 -31  -5 2800.11 623.725   3
  -1 -31   5 2136.77 808.972   3
   1 -31  -4 469.011 580.598   3
  -1 -31   4 827.580 745.338   3
  -1 -31   3-58.3331 663.844   3
   1 -31  -3-5.09989 571.147   3
  -1 -31   2 1193.28 642.577   3
   1 -31  -2 1228.82 610.394   3
  -1 -31   1 1105.92 669.729   3
   1 -31  -1 1322.96 614.913   3
   1 -31   0 691.857 584.316   3
  -1 -31   0 1122.99 720.266   3
  -1 -31  -1 2392.57 755.514   3
   1 -31   1 1865.54 624.992   3
  -1 -31  -2 1026.58 738.848   3
   1 -31   2-162.693 592.959   3
  -1 -31  -3 7612.98 866.369   3
   1 -31   3 7233.82 767.712   3
  -1 -31  -4-10.8005 715.382   3
   1 -31   4 163.225 651.809   3
  -1 -31  -5 692.406 695.774   3
   1 -31   5 655.500 701.086   3
   1 -31   6 848.919 721.384   3
  -1 -31  -6 155.154 618.378   3
   1 -31   7 9388.37 914.234   3
  -1 -31  -7 10909.9 872.816   3
  -1 -31  -8 8737.21 907.695   3
   1 -31   8 8475.41 907.248   3
  -1 -31  -9 3349.34 757.550   3
   1 -31   9 2159.92 805.612   3
   1 -31  10 1098.12 788.463   3
  -1 -31 -10 809.598 732.001   3
   1 -31  11 2735.79 849.369   3
  -1 -31 -11 1425.85 692.740   3
   1 -31  12 1069.35 763.268   3
  -1 -32  10 816.871 701.410   3
  -1 -32   9 6607.15 854.331   3
  -1 -32   8 651.413 733.149   3
  -1 -32   7 1316.09 816.912   3
  -1 -32   6-216.058 785.872   3
  -1 -32   5 3686.98 832.065   3
   1 -32  -5 3598.12 660.069   3
  -1 -32   4-193.186 725.952   3
   1 -32  -4 83.7904 573.126   3
   1 -32  -3 691.978 588.835   3
  -1 -32   3 325.466 667.929   3
   1 -32  -2 897.866 608.120   3
  -1 -32   2 1345.05 678.429   3
   1 -32  -1 372.554 600.526   3
  -1 -32   1 94.5959 655.713   3
  -1 -32   0 922.093 661.190   3
   1 -32   0 1233.05 610.119   3
   1 -32   1 8673.97 785.455   3
  -1 -32  -1 8320.02 829.992   3
   1 -32   2 2314.38 665.091   3
  -1 -32  -2 3496.39 725.699   3
   1 -32   3 600.725 633.376   3
  -1 -32  -3 544.421 644.082   3
   1 -32   4 309.141 626.767   3
  -1 -32  -4 400.152 652.585   3
   1 -32   5 11054.6 874.847   3
  -1 -32  -5 11878.0 931.220   3
  -1 -32  -6 451.539 750.317   3
   1 -32   6 721.833 655.354   3
   1 -32   7 621.681 653.715   3
  -1 -32  -7 620.589 698.296   3
  -1 -32  -8-142.368 673.479   3
   1 -32   8 120.847 660.936   3
  -1 -32  -9 4155.10 807.844   3
   1 -32   9 3617.01 751.284   3
   1 -32  10 1009.35 690.231   3
  -1 -32 -10 1324.31 715.060   3
  -1 -32 -11 5446.09 795.668   3
   1 -32  11 4950.16 800.267   3
  -1 -32 -12 723.149 700.256   3
  -1 -32 -13 666.729 725.683   3
  -1 -33   8 413.254 817.591   3
  -1 -33   7 4362.69 898.927   3
  -1 -33   6 260.730 761.382   3
  -1 -33   5 1233.44 765.527   3
  -1 -33   4 486.361 681.544   3
   1 -33  -3 1936.25 649.727   3
  -1 -33   3 1365.66 680.414   3
  -1 -33   2 9194.39 884.481   3
   1 -33  -2 8910.42 806.096   3
   1 -33  -1 5877.57 752.454   3
  -1 -33   1 6227.95 790.472   3
  -1 -33   0 1415.19 702.347   3
   1 -33   0 1412.92 632.374   3
   1 -33   1 648.668 637.512   3
  -1 -33  -1 858.499 682.042   3
  -1 -33  -2 1024.85 720.103   3
   1 -33   2 575.794 661.118   3
   1 -33   3 5571.64 775.865   3
  -1 -33  -3 6114.38 876.952   3
  -1 -33  -4 791.261 753.032   3
   1 -33   4 692.320 697.812   3
  -1 -33  -5 2938.92 771.386   3
   1 -33   5 2485.59 766.746   3
  -1 -33  -6 272.360 670.636   3
   1 -33   6-533.553 711.861   3
  -1 -33  -7 3626.49 827.083   3
   1 -33   7 3985.56 818.359   3
  -1 -33  -8-114.737 657.368   3
   1 -33   8 430.812 758.434   3
   1 -33   9 1362.69 777.465   3
  -1 -33  -9 2422.56 789.824   3
  -1 -33 -10 2058.43 724.276   3
  -1 -33 -11 544.474 713.899   3
  -1 -33 -12-63.1270 744.483   3
  -1 -34   6 858.796 706.388   3
  -1 -34   5 3460.36 764.063   3
  -1 -34   4 3513.70 726.637   3
  -1 -34   3 2242.28 726.833   3
   1 -34  -2 133.970 671.423   3
  -1 -34   2 342.137 685.031   3
   1 -34  -1 652.577 633.089   3
  -1 -34   1 787.659 706.572   3
   1 -34   0 6798.00 778.961   3
  -1 -34   0 6480.16 865.166   3
  -1 -34  -1 6724.00 898.594   3
   1 -34   1 6906.24 786.210   3
   1 -34   2 4385.24 768.673   3
  -1 -34  -2 4648.00 857.867   3
  -1 -34  -3 777.722 770.644   3
   1 -34   3 880.797 716.756   3
   1 -34   4 363.905 715.550   3
  -1 -34  -4 553.031 690.425   3
  -1 -34  -5 34.7664 710.466   3
   1 -34   5 154.568 715.557   3
   1 -34   6 3470.48 784.816   3
  -1 -34  -6 2504.53 794.800   3
   1 -34   7 706.827 685.170   3
  -1 -34  -7 571.552 668.501   3
   1 -34   8 406.777 653.168   3
  -1 -34  -8-68.1995 759.018   3
  -1 -34  -9 212.338 675.617   3
  -1 -34 -10 1326.43 728.087   3
  -1 -35   2 5562.34 829.555   3
  -1 -35   1 225.914 767.129   3
  -1 -35   0 1759.08 804.362   3
   1 -35   0 2168.50 682.435   3
  -1 -35  -1 789.870 791.556   3
   1 -35   1 1037.88 667.942   3
   1 -35   2 1110.22 711.027   3
  -1 -35  -2 1695.64 734.154   3
   1 -35   3 2426.15 766.729   3
  -1 -35  -3 2414.28 726.151   3
   1 -35   4 6287.25 879.111   3
  -1 -35  -4 5840.36 902.775   3
   1 -35   5 564.049 661.529   3
  -1 -35  -5 1124.47 723.101   3
  -1 -35  -6 454.844 680.255   3
   1 -36   1 193.278 642.680   3
   1 -36   2 3734.82 809.159   3
   1 -36   3 1719.47 771.981   3
  -2   0  27 386.849 666.797   3
  -2   0  27 340.800 651.117   0
  -2   0  26 10185.9 907.673   0
  -2   0  26 11171.8 853.671   3
  -2   0  25 659.176 620.013   0
  -2   0  25-118.077 591.187   3
  -2   0  24 2283.60 712.719   0
  -2   0  24 1655.80 671.067   3
  -2   0  23 18.9978 551.718   3
  -2   0  23-156.893 607.997   0
  -2   0  22 6621.55 671.318   3
  -2   0  22 5118.78 746.216   0
  -2   0  21-402.835 531.420   3
  -2   0  21-239.518 572.040   0
  -2   0  20 6604.53 631.108   3
  -2   0  20 6449.27 754.361   0
  -2   0  19 370.711 502.944   3
  -2   0  19 179.023 602.182   0
  -2   0  18 21008.9 898.640   0
  -2   0  18 21343.2 806.125   3
  -2   0  17-105.986 436.992   3
  -2   0  17 63.3716 632.361   0
  -2   0  16 8079.89 560.529   3
  -2   0  16 6924.62 687.057   0
  -2   0  15 47.0687 415.851   3
  -2   0  15-309.701 528.910   0
  -2   0  14 8263.58 663.835   0
  -2   0  14 8498.46 522.951   3
  -2   0  13 23.6067 580.143   0
  -2   0  13-44.0329 386.332   3
  -2   0  12 27739.6 647.877   3
  -2   0  12 26614.5 840.782   0
   2   0 -11-10.9122 292.637   1
  -2   0  11 43.8938 324.457   3
  -2   0  11-392.968 532.720   0
   2   0 -10 13587.1 428.504   1
  -2   0  10 13013.1 440.764   3
  -2   0  10 12795.4 635.134   0
  -2   0   9 199.396 271.506   3
   2   0  -9 93.0648 263.859   1
  -2   0   9-216.351 472.526   0
   2   0  -8 275577. 1403.78   3
  -2   0   8 274043. 1393.84   3
  -2   0   8 281990. 1780.27   0
   2   0  -8 273685. 1445.53   1
  -2   0   7 80.5312 233.391   3
   2   0  -7 62.8430 200.459   3
   2   0  -7-18.8338 281.582   1
  -2   0   7-57.4712 391.016   0
   2   0  -6 6119.02 237.787   3
  -2   0   6 5646.32 450.606   0
   2   0  -6 5328.98 369.329   1
  -2   0   6 5795.66 272.862   3
   2   0  -5 30.4968 328.809   1
  -2   0   5-71.4808 206.404   3
  -2   0   5-114.765 383.139   0
   2   0  -5 90.2253 151.540   3
   2   0  -4 358765. 1544.77   1
  -2   0   4 369368. 6337.80   0
  -2   0   4 361810. 4356.82   3
   2   0  -4 367134. 4462.43   3
  -2   0   3 61.5800 252.729   2
  -2   0   3 87.7048 162.980   3
   2   0  -3-30.1939 351.355   1
  -2   0   3-25.3253 324.448   0
  -2   0   2 651018. 7235.68   0
   2   0  -2 652260. 7862.25   1
  -2   0   2 661690. 7279.44   2
  -2   0   1 136.864 153.945   3
   2   0  -1 156.547 316.469   1
  -2   0   1-55.1685 232.854   0
   2   0  -1 160.446 266.792   2
  -2   0   1 309.523 221.983   2
  -2   0   0 190347. 3160.96   0
   2   0   0 195413. 1070.25   1
  -2   0   0 187160. 831.206   3
   2   0   0 186507. 960.675   2
   2   0   1 268.336 271.271   1
   2   0   1 145.260 207.479   3
  -2   0  -1 20.9087 153.046   0
  -2   0  -1 4.16382 184.761   3
  -2   0  -2 984429. 8983.57   3
   2   0   2 999999. 8968.05   1
   2   0   2 984841. 9024.29   3
   2   0   3 169.653 240.185   1
   2   0   3 81.8369 274.197   3
  -2   0  -3-56.2829 211.013   3
  -2   0  -4 125119. 965.888   3
   2   0   4 120893. 970.117   3
   2   0   4 123272. 785.117   1
   2   0   5 79.4031 189.473   1
   2   0   5 21.6863 307.934   3
   2   0   6 1103.84 83.0608   0
   2   0   6 967.908 333.708   3
   2   0   6 1078.55 177.715   1
   2   0   7-52.7412 161.587   1
   2   0   7 86.2175 108.735   0
   2   0   7-42.0772 345.402   3
   2   0   8 82450.0 539.747   0
   2   0   8 82189.5 1036.02   3
   2   0   8 81836.7 551.243   1
   2   0   9 36.6800 171.478   0
   2   0   9 35.7757 110.044   1
   2   0   9 255.343 402.061   3
   2   0  10 92736.1 1199.68   3
   2   0  10 95816.8 722.070   0
   2   0  11 93.4207 230.566   0
   2   0  11 181.409 484.496   3
   2   0  12 43927.3 608.334   0
   2   0  12 44793.0 990.238   3
   2   0  13 29.1628 260.283   0
   2   0  13 98.8047 476.684   3
   2   0  14 15312.5 468.293   0
   2   0  14 15163.6 767.829   3
   2   0  15 132.571 524.168   3
   2   0  15 173.936 319.067   0
   2   0  16 30478.2 653.940   0
   2   0  16 31937.2 1000.73   3
   2   0  17 351.198 652.323   3
   2   0  17 131.514 341.906   0
   2   0  18 6117.64 755.548   3
   2   0  18 5571.58 450.800   0
   2   0  19-171.989 611.403   3
   2   0  20 176.579 579.090   3
   2   0  21-179.125 585.968   3
   2   0  22 12008.2 873.253   3
   2   0  23-396.337 640.784   3
   2   0  24 6862.66 834.774   3
   2   0  25-195.867 722.196   3
   2   0  26 1936.01 851.311   3
  -2  -1  28-8.57733 666.600   3
  -2  -1  27 659.625 699.172   3
  -2   1  27 1155.69 686.735   0
  -2   1  27 598.376 673.653   3
  -2   1  26 3169.34 696.264   3
  -2   1  26 3802.47 782.908   0
  -2  -1  26 4337.32 792.387   0
  -2  -1  26 3946.09 737.033   3
  -2   1  25 304.767 621.640   3
  -2  -1  25 898.043 633.643   0
  -2   1  25 361.134 621.030   0
  -2  -1  25 967.607 604.278   3
  -2   1  24 6927.68 797.135   0
  -2  -1  24 8089.11 780.818   3
  -2   1  24 6835.89 704.755   3
  -2  -1  24 6660.09 798.898   0
  -2  -1  23 489.348 597.495   0
  -2   1  23 1202.65 689.904   0
  -2  -1  23 264.075 593.080   3
  -2   1  23 295.007 548.598   3
  -2  -1  22-82.2825 530.512   3
  -2   1  22 143.249 532.534   3
  -2   1  22 261.381 600.771   0
  -2  -1  22 215.760 644.052   0
  -2  -1  21 670.883 541.695   3
  -2   1  21 506.864 665.537   0
  -2   1  21 388.160 512.322   3
  -2  -1  21 285.334 622.277   0
  -2  -1  20 11174.1 718.444   3
  -2  -1  20 10597.1 747.813   0
  -2   1  20 11390.6 776.141   0
  -2   1  20 11323.6 708.634   3
  -2  -1  19 9056.53 675.594   3
  -2   1  19 9004.98 779.882   0
  -2  -1  19 9865.42 790.235   0
  -2   1  19 8509.42 643.013   3
  -2   1  18 12992.4 817.131   0
  -2  -1  18 13142.7 721.734   3
  -2  -1  18 12816.1 828.439   0
  -2   1  18 14104.5 707.928   3
  -2  -1  17 8852.76 742.929   0
  -2   1  17 8923.36 582.078   3
  -2  -1  17 8252.61 596.585   3
  -2   1  17 7621.41 704.259   0
  -2  -1  16 2441.01 481.351   3
  -2   1  16 1653.56 634.018   0
  -2   1  16 1883.99 443.942   3
  -2  -1  16 2299.42 597.622   0
  -2  -1  15 8242.93 574.011   3
  -2   1  15 8484.74 536.524   3
  -2   1  15 7318.93 640.806   0
  -2  -1  15 6918.89 626.654   0
  -2  -1  14 16060.5 621.854   3
  -2  -1  14 16230.3 740.997   0
  -2   1  14 16111.4 602.080   3
  -2   1  14 16731.6 802.319   0
  -2   1  13 5256.77 456.089   3
  -2   1  13 5171.58 654.911   0
  -2  -1  13 5260.32 604.377   0
   2   1 -13 5337.03 367.752   1
  -2  -1  13 5201.76 473.453   3
   2   1 -12 31160.3 575.161   1
  -2   1  12 30832.0 665.771   3
  -2  -1  12 31279.6 859.678   0
  -2   1  12 28644.6 816.747   0
  -2  -1  12 30859.4 696.941   3
  -2  -1  11 17542.0 542.172   3
   2   1 -11 18751.5 478.025   1
  -2  -1  11 18058.4 723.784   0
  -2   1  11 18057.2 710.953   0
  -2   1  11 18180.5 516.935   3
  -2  -1  10 62775.2 1008.57   0
  -2   1  10 63440.7 780.737   3
  -2  -1  10 62115.9 818.144   3
   2   1 -10 60597.9 739.042   1
   2   1  -9 22765.1 498.113   1
  -2   1   9 21863.9 471.180   3
  -2  -1   9 21855.3 667.228   0
  -2  -1   9 23131.7 517.432   3
   2  -1  -9 23122.4 507.978   1
   2   1  -8 1087.48 281.487   1
  -2  -1   8 819.714 268.712   3
  -2  -1   8 651.509 442.898   0
   2  -1  -8 1224.17 305.853   1
   2  -1  -8 1079.30 207.692   3
  -2   1   8 669.143 233.264   3
  -2   1   7 93366.7 733.671   3
   2  -1  -7 92694.4 868.053   1
  -2  -1   7 93311.2 1033.18   0
   2   1  -7 92031.6 848.174   1
   2  -1  -7 93482.1 733.844   3
   2   1  -7 92414.8 807.092   3
  -2  -1   7 93262.6 804.569   3
  -2  -1   6 228585. 1136.45   3
  -2  -1   6 229778. 1468.00   0
   2  -1  -6 235625. 4082.58   3
   2   1  -6 228870. 1153.66   3
  -2   1   6 225568. 1005.03   3
   2   1  -6 228763. 1282.63   1
   2  -1  -6 227657. 1297.63   1
  -2  -1   5 12.3367 354.646   0
   2  -1  -5 313.214 139.161   3
  -2  -1   5 37.4997 229.913   3
   2   1  -5 55.3331 162.512   3
   2  -1  -5 162.462 327.192   1
  -2   1   5 96.7023 172.604   3
   2   1  -5-17.8962 324.851   1
  -2   1   4 43402.9 361.816   3
   2   1  -4 43224.6 636.905   1
   2  -1  -4 42898.3 357.779   3
  -2   1   4 43365.4 579.920   1
  -2  -1   4 41992.7 654.288   0
  -2  -1   4 43908.7 480.452   3
   2   1  -4 43273.5 450.940   3
   2  -1  -4 43219.4 629.102   1
  -2   1   3 127636. 1983.26   3
  -2   1   3 130057. 926.760   2
  -2  -1   3 126061. 918.421   0
  -2   1   3 127809. 925.593   1
  -2  -1   3 126949. 843.310   2
  -2  -1   3 125957. 698.626   3
   2  -1  -3 128734. 958.105   1
  -2   1   2 343821. 5516.95   2
   2  -1  -2 343440. 5716.16   1
  -2  -1   2 342955. 5329.26   0
  -2  -1   2 340186. 4959.70   2
  -2   1   2 341142. 1455.25   1
   2  -1  -2 348772. 5615.50   2
  -2  -1   1 284778. 4431.52   0
   2  -1  -1 283841. 4841.20   2
   2   1  -1 283968. 4417.14   0
   2  -1  -1 287136. 5092.58   1
  -2   1   1 283615. 3210.31   3
  -2   1   1 288008. 4927.50   2
  -2   1   1 281650. 1294.64   1
  -2  -1   1 281546. 4304.46   2
   2   1  -1 284826. 4316.22   2
  -2  -1   0 634758. 6546.55   3
   2   1   0 660021. 6543.71   2
   2  -1   0 666936. 7377.56   2
   2   1   0 657986. 6072.67   0
  -2   1   0 664982. 5590.40   3
   2  -1   0 663168. 5672.41   3
  -2   1   0 645594. 7607.93   1
  -2  -1   0 659494. 6049.06   0
   2  -1   0 676204. 7635.54   1
  -2   1  -1 201998. 904.478   3
   2  -1   1 207913. 1078.23   1
   2  -1   1 209101. 3616.67   3
   2   1   1 201325. 756.488   0
   2   1   1 206804. 3967.82   3
  -2  -1  -1 201041. 1003.92   3
  -2   1  -2 58958.8 317.428   0
  -2  -1  -2 58999.5 611.536   3
   2  -1   2 59571.5 600.527   1
   2  -1   2 59492.9 585.526   3
   2   1   2 59596.1 629.256   3
  -2   1  -2 57823.6 566.564   3
   2  -1   3 150.416 235.218   1
  -2   1  -3 45.6388 214.486   3
  -2  -1  -3 391.817 261.501   3
   2  -1   3 165.019 270.828   3
   2   1   3 258.421 283.620   3
  -2   1  -4 72603.9 731.058   3
   2  -1   4 73444.7 763.305   3
   2  -1   4 73389.0 617.228   1
   2   1   4 73351.5 805.339   3
   2  -1   5 56556.3 531.129   1
   2  -1   5 58112.5 739.718   3
   2   1   5 57834.9 768.550   3
   2  -1   6 5364.79 223.892   1
   2  -1   6 5887.79 391.836   3
   2   1   6 5641.52 400.483   3
   2  -1   7 70784.9 914.658   3
   2   1   7 74242.4 945.432   3
   2  -1   7 72938.7 545.967   1
   2  -1   8 36254.6 751.319   3
   2   1   8 36040.1 745.108   3
   2   1   8 35044.5 399.256   1
   2  -1   8 36028.9 374.796   1
   2  -1   9 10870.5 265.355   0
   2   1   9 10146.7 229.299   1
   2   1   9 10722.0 517.039   3
   2  -1   9 10790.1 556.215   3
   2  -1  10 50247.3 536.189   0
   2   1  10 49295.0 928.566   3
   2  -1  10 50252.9 934.270   3
   2   1  10 46958.6 384.464   1
   2   1  10 48507.8 548.895   0
   2   1  11 134.504 53.4533   1
   2  -1  11 219.364 459.837   3
   2   1  11 462.432 500.112   3
   2  -1  11 428.906 233.775   0
   2   1  11 249.021 228.702   0
   2   1  12 34869.0 564.264   0
   2   1  12 34440.8 896.284   3
   2  -1  12 34892.5 552.371   0
   2  -1  12 36297.7 923.936   3
   2   1  13 25534.2 528.100   0
   2  -1  13 25207.8 821.186   3
   2  -1  13 27590.4 529.146   0
   2   1  13 27706.9 842.309   3
   2  -1  14 11551.9 424.901   0
   2   1  14 11790.5 442.303   0
   2  -1  14 11540.4 704.138   3
   2   1  14 10681.4 674.274   3
   2  -1  15 9839.14 740.272   3
   2   1  15 9793.91 720.045   3
   2  -1  15 9269.69 424.433   0
   2   1  15 9655.51 443.919   0
   2   1  16 6988.90 432.560   0
   2  -1  16 7118.34 422.019   0
   2  -1  16 7973.56 738.372   3
   2   1  16 6843.81 674.392   3
   2  -1  17 1769.50 637.653   3
   2   1  17 1540.28 370.485   0
   2   1  17 1321.73 626.906   3
   2  -1  18 73548.8 1452.40   3
   2   1  18 70088.3 991.119   0
   2   1  19 8271.21 787.948   3
   2  -1  19 7844.05 727.829   3
   2   1  20 1742.73 615.128   3
   2  -1  20 1345.52 594.836   3
   2  -1  21 172.147 603.689   3
   2   1  21 263.070 596.520   3
   2   1  22 4048.85 726.117   3
   2  -1  22 4132.57 751.510   3
   2  -1  23 2215.73 772.927   3
   2   1  23 1676.45 702.464   3
   2  -1  24 9255.77 955.401   3
   2   1  24 7753.20 851.409   3
   2   1  25 479.416 676.570   3
   2  -1  25 86.3730 783.190   3
   2   1  26 1866.56 711.624   3
   2  -1  26 1592.80 811.551   3
  -2  -2  28 497.719 714.126   3
  -2   2  27 193.962 647.189   3
  -2  -2  27 826.827 692.972   3
  -2   2  27 130.033 718.466   0
  -2   2  26-209.331 704.025   0
  -2   2  26 342.651 589.533   3
  -2  -2  26 4.36104 644.661   3
  -2   2  25 384.877 622.128   3
  -2   2  25 767.523 627.621   0
  -2  -2  25 144.137 607.803   3
  -2   2  24 640.884 665.404   0
  -2  -2  24 871.474 617.410   3
  -2   2  24 662.979 565.756   3
  -2  -2  24 1654.17 703.237   0
  -2  -2  23 2816.36 673.708   3
  -2   2  23 2839.68 610.956   3
  -2  -2  23 3124.91 685.241   0
  -2   2  23 3630.10 751.389   0
  -2  -2  22 985.932 595.084   3
  -2   2  22 861.853 544.153   3
  -2   2  22 890.198 606.307   0
  -2  -2  22 1764.07 604.913   0
  -2   2  21 3217.46 711.483   0
  -2   2  21 2940.32 559.806   3
  -2  -2  21 4282.49 717.759   0
  -2  -2  21 3547.68 622.329   3
  -2  -2  20 771.127 646.419   0
  -2   2  20 250.788 626.475   0
  -2  -2  20 557.205 523.956   3
  -2   2  20 354.760 509.267   3
  -2   2  19 13885.7 715.805   3
  -2  -2  19 13984.5 839.761   0
  -2   2  19 14060.1 831.537   0
  -2  -2  19 14002.4 740.769   3
  -2  -2  18 4259.50 578.771   3
  -2   2  18 4362.03 544.087   3
  -2  -2  18 4240.73 658.123   0
  -2   2  18 3556.04 692.948   0
  -2   2  17 3674.07 498.223   3
  -2   2  17 3164.31 606.479   0
  -2  -2  17 4237.73 534.396   3
  -2  -2  17 3773.46 617.845   0
  -2  -2  16 9738.90 616.501   3
  -2   2  16 9216.66 561.968   3
  -2   2  16 8104.73 729.459   0
  -2  -2  16 9329.34 691.198   0
  -2  -2  15 559.557 572.891   0
  -2   2  15 630.604 410.793   3
  -2  -2  15 647.696 469.711   3
  -2   2  15 241.897 533.161   0
  -2   2  14 10528.6 544.024   3
  -2   2  14 9168.41 724.821   0
  -2  -2  14 10056.0 720.475   0
   2   2 -14 10914.3 407.324   1
  -2  -2  14 9835.23 570.440   3
  -2   2  13 130691. 1292.57   3
  -2  -2  13 131914. 1375.52   3
   2   2 -13 133148. 1078.00   1
  -2  -2  13 133586. 1567.65   0
  -2   2  12 8349.12 453.901   3
  -2  -2  12 7794.11 591.574   0
  -2  -2  12 8331.84 498.463   3
   2   2 -12 8357.59 388.554   1
  -2  -2  11 6677.22 443.533   3
  -2  -2  11 6288.99 603.102   0
  -2   2  11 6334.36 380.066   3
   2   2 -11 7046.36 370.837   1
  -2  -2  10 18854.2 646.015   0
  -2   2  10 20150.5 490.528   3
  -2  -2  10 18751.4 537.722   3
   2   2 -10 20010.8 482.463   1
  -2   2   9 15177.6 405.125   3
  -2  -2   9 15086.5 469.716   3
   2   2  -9 15050.2 422.839   1
  -2  -2   9 14591.0 625.667   0
   2   2  -8 3710.96 322.973   1
  -2   2   8 3349.71 248.591   3
  -2  -2   8 3670.62 498.669   0
   2  -2  -8 3641.94 239.378   3
  -2  -2   8 3671.82 313.976   3
   2  -2  -7 78292.0 650.737   3
  -2  -2   7 79425.1 965.033   0
  -2   2   7 77028.4 639.798   3
   2   2  -7 77543.8 794.893   1
  -2  -2   7 78317.0 775.770   3
   2  -2  -7 78503.0 822.165   1
   2  -2  -6 25875.9 347.878   3
  -2  -2   6 25459.5 609.357   0
   2   2  -6 25716.6 450.705   3
  -2   2   6 25071.7 354.066   3
  -2  -2   6 25365.3 472.825   3
   2  -2  -6 25456.8 535.697   1
   2  -2  -5 8605.71 196.749   3
   2   2  -5 8325.39 286.873   3
  -2   2   5 8592.92 213.868   3
  -2  -2   5 7904.18 434.376   0
  -2  -2   5 7746.74 322.513   3
   2  -2  -5 9438.66 408.905   1
  -2  -2   4 80631.3 844.175   0
  -2   2   4 80271.0 404.589   3
  -2  -2   4 80370.1 669.324   3
   2  -2  -4 81156.1 819.484   1
   2   2  -4 80455.6 654.961   3
  -2   2   4 79130.9 760.552   1
   2  -2  -4 81123.9 406.706   3
  -2   2   3 153840. 1022.03   1
   2   2  -3 151401. 1007.66   0
  -2   2   3 154170. 1038.21   2
   2  -2  -3 153758. 1052.79   1
  -2  -2   3 152371. 848.136   3
  -2  -2   3 152797. 1019.93   0
  -2   2   2 966.555 251.660   1
  -2   2   2 1026.03 274.164   2
  -2  -2   2 887.263 183.497   2
  -2  -2   2 1009.47 301.360   0
   2  -2  -2 1435.31 370.607   2
   2  -2  -2 1144.65 358.034   1
   2   2  -2 674.921 275.483   0
   2   2  -1 14605.0 346.922   0
   2   2  -1 13984.9 296.630   2
  -2   2   1 14260.6 178.942   3
   2  -2  -1 15022.6 416.581   1
   2  -2  -1 14791.0 420.461   2
  -2  -2   1 13699.8 268.804   2
  -2   2   1 14087.3 353.523   2
  -2   2   1 14613.7 373.828   1
  -2  -2   1 14806.2 358.182   0
   2   2   0 77982.3 561.696   2
   2  -2   0 80744.4 481.439   3
   2  -2   0 79568.7 743.554   2
  -2   2   0 78868.5 709.242   1
   2   2   0 78110.0 585.925   0
  -2   2   0 77312.3 466.651   3
   2  -2   0 81350.3 740.134   1
  -2   2  -1 31838.6 374.736   3
   2  -2   1 33455.1 388.052   3
   2  -2   1 34053.1 510.184   1
  -2   2  -1 32499.7 480.104   1
  -2  -2  -1 32047.5 473.901   3
   2   2   1 32819.1 367.583   0
   2   2   2 889880. 9259.99   3
   2  -2   2 888864. 8154.16   3
   2  -2   2 878046. 8546.09   1
  -2  -2  -2 875649. 9246.91   3
  -2   2  -2 881037. 8671.69   1
  -2   2  -2 869908. 7976.01   3
  -2   2  -3 18672.5 395.593   3
   2   2   3 19014.2 481.526   3
  -2  -2  -3 18552.4 418.168   3
   2  -2   3 19211.1 417.654   3
  -2   2  -3 19494.2 383.056   1
   2  -2   3 19363.4 392.786   1
   2  -2   4 16733.4 351.943   1
   2  -2   4 16866.1 451.330   3
   2   2   4 17196.6 507.021   3
  -2   2  -4 16062.8 339.742   1
  -2   2  -4 15945.5 388.276   3
   2  -2   5 63025.3 766.816   3
   2   2   5 66230.7 823.706   3
   2  -2   5 62369.5 564.940   1
   2  -2   6 227.897 327.271   3
   2   2   6 78.1346 328.932   3
   2   2   7 86499.9 1009.87   3
   2  -2   7 88509.3 997.841   3
   2   2   8 2258.44 403.374   3
   2  -2   8 1900.66 414.407   3
   2  -2   9 1884.45 432.700   3
   2   2   9 1721.67 416.452   3
   2  -2  10 527.864 463.429   3
   2   2  10 320.885 449.130   3
   2  -2  11 152584. 1573.24   3
   2   2  11 153152. 1572.96   3
   2   2  11 147206. 680.562   1
   2  -2  12 9872.18 661.175   3
   2   2  12 9573.05 377.710   0
   2   2  12 10448.0 639.168   3
   2   2  13 3273.47 315.967   0
   2   2  13 3762.13 578.914   3
   2  -2  13 4232.41 611.681   3
   2  -2  14 1130.08 564.039   3
   2   2  14 1164.34 524.944   3
   2   2  14 806.974 317.594   0
   2  -2  15 17040.6 797.299   3
   2   2  15 16098.4 800.800   3
   2   2  15 16133.9 502.136   0
   2   2  16 9389.79 742.768   3
   2  -2  16 9653.12 703.976   3
   2   2  16 8957.69 467.450   0
   2  -2  17 29541.7 992.107   3
   2   2  17 29274.6 997.794   3
   2   2  17 30052.4 689.440   0
   2  -2  18 4802.91 672.845   3
   2   2  18 4015.85 694.913   3
   2   2  18 3872.99 422.589   0
   2   2  19 1603.11 682.424   3
   2  -2  19 2039.99 624.572   3
   2   2  20 263.166 611.582   3
   2  -2  20-12.4476 603.700   3
   2   2  21 4833.75 703.348   3
   2  -2  21 4583.74 762.049   3
   2  -2  22 5269.91 820.814   3
   2   2  22 5344.82 769.269   3
   2   2  23 82.6775 702.511   3
   2  -2  23 387.151 771.270   3
   2   2  24 769.414 746.660   3
   2  -2  24 704.855 759.788   3
   2  -2  25 1986.09 706.361   3
   2   2  25 1887.96 800.859   3
   2   2  26 2261.08 820.311   3
   2  -2  26 2004.51 793.157   3
  -2  -3  28 388.078 727.663   3
  -2  -3  27 108.789 681.187   3
  -2   3  27 45.1744 742.546   0
  -2   3  26-104.273 618.487   3
  -2  -3  26 89.4606 614.363   3
  -2   3  26 335.934 697.505   0
  -2   3  25 1774.76 611.149   3
  -2  -3  25 1910.54 656.046   3
  -2   3  25 2206.26 687.399   0
  -2  -3  24-147.421 580.050   3
  -2   3  24-164.674 668.217   0
  -2   3  24 31.1918 567.646   3
  -2   3  23 951.665 710.214   0
  -2  -3  23 1491.82 635.717   3
  -2   3  23 1457.12 569.750   3
  -2  -3  23 2245.81 705.005   0
  -2   3  22 74.8240 625.328   0
  -2  -3  22 585.815 595.131   3
  -2   3  22 93.4004 527.735   3
  -2  -3  22 530.232 630.309   0
  -2   3  21 8753.29 760.757   0
  -2  -3  21 8277.66 721.843   3
  -2   3  21 8352.38 664.236   3
  -2  -3  21 8186.39 719.522   0
  -2   3  20-372.238 657.739   0
  -2  -3  20-69.4449 560.136   3
  -2  -3  20 364.940 553.269   0
  -2   3  20-122.528 474.740   3
  -2  -3  19 2551.26 586.240   3
  -2   3  19 3086.15 534.146   3
  -2  -3  19 2895.07 609.820   0
  -2   3  19 2214.87 643.354   0
  -2  -3  18 352.203 556.692   0
  -2  -3  18 969.829 527.889   3
  -2   3  18 649.044 461.145   3
  -2   3  18 35.7665 599.183   0
  -2  -3  17 7356.66 601.780   3
  -2   3  17 7176.12 544.307   3
  -2   3  17 6379.36 723.753   0
  -2  -3  17 7185.14 664.056   0
  -2  -3  16 4461.72 534.342   3
  -2   3  16 4422.58 636.528   0
  -2   3  16 5073.17 498.678   3
  -2  -3  16 5054.91 612.437   0
  -2  -3  15 70227.2 1159.38   3
  -2   3  15 70827.4 1074.41   3
  -2   3  15 69487.1 1283.61   0
  -2  -3  15 70096.1 1265.27   0
   2   3 -15 69098.9 795.222   1
  -2  -3  14 2589.25 628.243   0
  -2  -3  14 2823.57 481.580   3
  -2   3  14 3052.66 416.430   3
   2   3 -14 2898.60 323.620   1
  -2   3  13 11399.8 513.430   3
  -2  -3  13 11097.3 669.111   0
  -2  -3  13 11778.1 594.058   3
   2   3 -13 10680.9 422.259   1
   2   3 -12 56.9374 298.985   1
  -2   3  12 181.408 327.382   3
  -2  -3  12 84.0174 400.156   3
  -2  -3  12 13.9108 567.291   0
  -2   3  11 105486. 1027.07   3
  -2  -3  11 107383. 1317.01   0
  -2  -3  11 105745. 1164.98   3
   2   3 -11 104683. 957.793   1
  -2  -3  10 444.430 341.656   3
  -2   3  10 361.342 260.598   3
  -2  -3  10 257.222 433.982   0
   2   3 -10 291.672 291.845   1
  -2  -3   9 189821. 1563.10   0
  -2   3   9 190799. 1176.04   3
  -2  -3   9 194719. 1385.04   3
   2   3  -9 190080. 1242.21   1
   2  -3  -8 15415.2 345.396   3
  -2   3   8 15740.9 366.742   3
  -2  -3   8 15867.4 616.107   0
  -2  -3   8 15692.2 468.700   3
   2  -3  -7 18713.5 332.179   3
  -2   3   7 19241.9 346.715   3
  -2  -3   7 19896.9 466.768   3
  -2  -3   7 19247.1 565.262   0
  -2  -3   6 11906.1 395.178   3
  -2  -3   6 11704.0 480.077   0
  -2   3   6 11889.8 253.790   3
   2  -3  -6 11665.6 242.022   3
   2   3  -6 10875.9 340.231   3
  -2   3   5 303342. 3469.97   3
   2   3  -5 302789. 1402.90   3
  -2  -3   5 304795. 1620.39   0
  -2  -3   5 298470. 1381.09   3
   2  -3  -5 304483. 3485.30   3
  -2  -3   4 7647.85 344.766   3
  -2  -3   4 8292.82 454.986   0
   2  -3  -4 8048.90 438.760   1
   2   3  -3 33258.6 530.321   0
  -2   3   3 32365.0 531.256   2
  -2   3   3 33599.2 543.246   1
  -2  -3   3 32123.8 494.047   3
   2  -3  -3 34219.2 597.342   1
  -2  -3   3 34074.5 587.570   0
  -2  -3   2 17054.6 286.672   2
   2  -3  -2 17671.7 508.599   2
  -2   3   2 17595.2 443.462   2
   2  -3  -2 16741.1 452.261   1
  -2   3   2 17575.7 424.879   1
   2   3  -2 17528.0 413.515   0
   2  -3  -1 25391.5 495.825   2
  -2   3   1 25157.0 480.553   2
   2   3  -1 24757.0 329.911   2
  -2   3   1 23783.4 471.009   1
  -2  -3   1 24200.1 299.185   2
   2   3  -1 24779.5 423.876   0
   2  -3  -1 24358.4 504.106   1
   2   3   0 14461.4 328.465   0
   2  -3   0 14653.5 227.976   3
  -2   3   0 13854.1 395.105   1
   2   3   0 14606.7 277.733   2
   2  -3   0 14656.6 463.117   2
   2  -3   0 14560.2 416.924   1
  -2   3   0 13874.4 226.491   3
   2  -3   1 126122. 693.886   3
  -2   3  -1 123054. 881.557   1
   2  -3   1 124255. 903.069   1
  -2   3  -1 124688. 686.932   3
  -2  -3  -1 120613. 893.456   3
  -2   3  -2 48788.2 522.730   3
   2  -3   2 52786.3 611.800   1
   2  -3   2 52123.9 540.832   3
  -2  -3  -2 50734.4 630.787   3
  -2   3  -2 51714.3 590.286   1
   2  -3   3 122253. 872.973   3
  -2  -3  -3 115882. 967.633   3
  -2   3  -3 119914. 854.538   3
   2   3   3 121674. 996.693   3
  -2   3  -3 120645. 835.511   1
  -2   3  -4 53248.9 557.264   1
   2   3   4 52675.8 720.484   3
  -2   3  -4 51099.5 632.466   3
   2  -3   4 51590.7 654.977   3
  -2   3  -5 196022. 993.025   1
   2  -3   5 192300. 1266.86   3
   2   3   5 193743. 1353.87   3
  -2   3  -5 195000. 2420.77   0
  -2   3  -6 436.793 165.008   1
   2  -3   6 904.109 345.498   3
   2   3   6 426.654 321.498   3
  -2   3  -6 514.015 102.991   0
   2  -3   7 29149.6 636.650   3
   2   3   7 28819.9 680.445   3
   2   3   8 996.255 370.347   3
   2  -3   8 979.256 396.568   3
   2   3   9 385405. 2250.36   3
   2  -3   9 383672. 2218.97   3
   2  -3  10 13741.7 605.944   3
   2   3  10 14111.0 617.489   3
   2   3  11 7481.73 564.285   3
   2  -3  11 7565.50 558.814   3
   2  -3  12-11.0308 488.398   3
   2   3  12 131.807 459.244   3
   2  -3  13 135290. 1620.57   3
   2   3  13 134344. 1606.80   3
   2  -3  14 9208.12 704.637   3
   2   3  14 8338.62 399.998   0
   2   3  14 9263.71 674.758   3
   2   3  15 40529.6 720.814   0
   2  -3  15 42045.9 1081.55   3
   2   3  15 41185.3 1043.15   3
   2   3  16 5099.04 654.994   3
   2  -3  16 5775.62 687.233   3
   2   3  16 4981.40 422.440   0
   2  -3  17 4218.07 645.751   3
   2   3  17 3582.38 682.215   3
   2   3  17 3090.64 398.806   0
   2  -3  18 1842.24 600.446   3
   2   3  18 1921.62 405.699   0
   2   3  18 2306.49 594.302   3
   2  -3  19 29392.3 1064.00   3
   2   3  19 28293.7 1063.23   3
   2   3  20 1444.88 681.046   3
   2  -3  20 2304.03 704.453   3
   2   3  21 2104.78 651.808   3
   2  -3  21 2842.90 778.584   3
   2   3  22-132.109 679.620   3
   2  -3  22-313.084 722.815   3
   2  -3  23 1579.78 694.975   3
   2   3  23 1562.68 776.095   3
   2  -3  24 1690.47 717.652   3
   2   3  24 1348.24 782.410   3
   2   3  25 1922.54 821.642   3
   2  -3  25 1228.75 831.955   3
   2   3  26 622.775 810.665   3
   2  -3  26 1042.95 824.401   3
  -2   4  27 2976.41 761.562   0
  -2  -4  27 2949.46 732.714   3
  -2   4  26 240.115 649.359   0
  -2   4  26 371.553 606.551   3
  -2  -4  26 90.1346 626.259   3
  -2   4  25 91.6999 587.697   3
  -2  -4  25 24.2644 622.120   3
  -2   4  25 234.730 624.166   0
  -2   4  24-19.5249 687.223   0
  -2  -4  24 165.385 612.550   3
  -2   4  24 82.8406 546.499   3
  -2  -4  23 1177.02 652.723   3
  -2   4  23 746.950 537.918   3
  -2   4  23 1321.75 727.091   0
  -2   4  22 2651.68 566.470   3
  -2   4  22 1281.64 686.374   0
  -2  -4  22 2116.15 637.330   3
  -2  -4  21 766.527 654.593   0
  -2  -4  21 406.603 583.005   3
  -2   4  21 834.290 515.346   3
  -2   4  21-119.161 585.267   0
  -2  -4  20 632.752 638.406   0
  -2   4  20 633.267 624.139   0
  -2   4  20 464.570 476.011   3
  -2  -4  20 584.704 554.632   3
  -2   4  19 3697.77 525.871   3
  -2  -4  19 3857.24 585.493   3
  -2  -4  19 4001.75 701.031   0
  -2   4  19 3587.62 709.924   0
  -2  -4  18 4576.75 587.928   3
  -2   4  18 3837.29 502.717   3
  -2  -4  18 4634.61 695.194   0
  -2   4  18 3196.35 692.577   0
  -2   4  17 22276.8 886.464   0
  -2   4  17 23284.5 743.894   3
  -2  -4  17 22995.5 836.766   3
  -2  -4  17 24055.2 897.686   0
  -2  -4  16 6098.76 570.271   3
  -2  -4  16 6182.85 619.852   0
  -2   4  16 5902.60 493.837   3
   2   4 -16 5953.85 343.122   1
  -2   4  15 20085.8 652.038   3
   2   4 -15 18636.6 488.664   1
  -2  -4  15 19422.4 744.308   3
  -2  -4  15 19933.0 849.976   0
   2   4 -14 1332.54 309.937   1
  -2  -4  14 1608.98 478.642   3
  -2  -4  14 1611.71 537.047   0
  -2   4  14 1681.71 387.201   3
  -2  -4  13 56757.5 1001.80   3
  -2  -4  13 57443.3 1124.70   0
  -2   4  13 55574.9 871.032   3
   2   4 -13 56317.5 754.934   1
  -2  -4  12 4959.01 476.160   3
   2   4 -12 4433.19 356.516   1
  -2   4  12 4894.17 381.686   3
  -2  -4  12 4916.56 604.943   0
  -2   4  11 29664.1 599.775   3
  -2  -4  11 28912.5 807.576   0
   2   4 -11 28954.2 577.057   1
  -2  -4  11 30276.5 715.410   3
  -2  -4  10 577.152 495.056   0
  -2   4  10 542.124 281.246   3
  -2  -4  10 617.752 387.383   3
  -2   4   9 32779.5 525.609   3
  -2  -4   9 32474.5 663.919   3
  -2  -4   9 32828.9 802.971   0
   2  -4  -9 31762.4 508.371   3
  -2   4   8 26909.8 437.656   3
   2  -4  -8 28204.8 442.340   3
  -2  -4   8 27928.8 684.946   0
  -2  -4   8 27743.3 583.400   3
  -2   4   7 83306.2 632.570   3
  -2  -4   7 81264.9 872.796   3
  -2  -4   7 81975.1 994.089   0
   2  -4  -7 83017.2 631.823   3
  -2   4   6 2552.56 171.726   3
  -2  -4   6 2707.15 307.499   3
  -2  -4   6 2690.95 436.474   0
   2  -4  -6 2468.87 158.913   3
  -2   4   5 26316.0 274.620   3
   2  -4  -5 25470.7 261.573   3
  -2  -4   5 25704.3 503.599   3
  -2  -4   5 26150.1 598.626   0
  -2  -4   4 8467.41 385.461   3
  -2  -4   3 173077. 1070.88   3
   2   4  -2 16329.6 411.259   0
  -2  -4   2 15971.5 253.782   2
   2  -4  -2 16018.3 496.606   2
  -2   4   1 10287.4 357.478   2
   2   4  -1 11104.3 357.436   0
  -2   4   1 10756.4 336.846   1
  -2   4   1 10715.7 157.631   3
   2  -4  -1 11058.3 447.066   2
   2  -4   0 55902.8 403.296   3
   2  -4   0 56940.8 720.643   2
  -2   4   0 55558.9 641.180   1
   2   4   0 55450.6 399.440   2
  -2   4   0 56058.6 404.811   3
  -2   4  -1 17219.8 301.572   3
   2  -4   1 17862.4 463.173   2
   2  -4   1 17449.1 309.110   3
  -2   4  -1 17638.3 415.275   1
   2  -4   2 427411. 5730.86   3
  -2   4  -2 428651. 6421.93   1
  -2  -4  -2 424968. 1767.35   3
  -2   4  -2 422816. 5685.19   3
   2  -4   3 3557.51 284.321   3
  -2   4  -3 3281.82 259.493   1
  -2   4  -3 3127.18 237.353   3
   2   4   4 590.369 335.693   3
  -2   4  -4 544.088 215.170   1
   2  -4   4 493.140 282.430   3
   2   4   5 97046.8 1012.56   3
  -2   4  -5 95093.5 741.386   1
   2  -4   5 93534.6 911.555   3
   2  -4   6 2748.79 339.738   3
  -2   4  -6 2858.40 155.148   0
   2   4   6 2635.78 415.952   3
  -2   4  -6 2446.11 206.931   1
   2  -4   7 173496. 1373.48   3
  -2   4  -7 177562. 807.926   0
   2   4   7 174454. 1445.92   3
  -2   4  -7 177381. 920.727   1
   2  -4   8 12889.9 521.292   3
   2   4   8 13173.0 541.824   3
  -2   4  -8 13475.4 289.653   1
   2  -4   9 40814.7 819.766   3
   2   4   9 40178.0 856.196   3
   2  -4  10 21199.3 679.663   3
   2   4  10 21537.4 725.653   3
   2   4  11 80243.6 1205.87   3
   2  -4  11 80964.8 1194.61   3
   2   4  12 2126.64 498.716   3
   2  -4  12 2683.22 502.783   3
   2   4  13 42011.6 998.093   3
   2  -4  13 41308.8 994.688   3
   2  -4  14 2514.18 623.570   3
   2   4  14 2286.64 607.647   3
   2  -4  15 39643.7 1080.63   3
   2   4  15 40573.2 1074.13   3
   2   4  16 6581.81 423.498   0
   2   4  16 6917.51 689.600   3
   2  -4  16 6667.58 729.451   3
   2  -4  17 5860.50 692.615   3
   2   4  17 5903.56 431.079   0
   2   4  17 5812.88 652.246   3
   2   4  18 481.233 643.361   3
   2  -4  18 609.063 555.841   3
   2   4  18 304.001 378.297   0
   2  -4  19 1540.20 680.794   3
   2   4  19 2032.32 622.266   3
   2  -4  20 14901.0 950.621   3
   2   4  20 15274.4 941.741   3
   2  -4  21 18547.3 1017.72   3
   2   4  21 18002.2 937.160   3
   2  -4  22 1673.92 664.200   3
   2   4  22 875.304 689.771   3
   2   4  23 244.379 747.129   3
   2  -4  23-136.712 732.139   3
   2   4  24 809.189 765.622   3
   2  -4  24 244.864 789.210   3
   2   4  25 3078.41 801.229   3
   2  -4  25 3219.82 775.419   3
   2   4  26 1053.59 757.102   3
  -2   5  27 691.632 659.250   0
  -2  -5  27 94.4624 698.912   3
  -2   5  26 43.5345 672.918   0
  -2  -5  26-38.6024 699.788   3
  -2   5  25 416.132 687.098   0
  -2  -5  25 235.892 666.172   3
  -2   5  25 200.522 545.374   3
  -2  -5  24 3305.59 717.418   3
  -2   5  24 3255.00 620.137   3
  -2   5  24 2875.49 772.668   0
  -2   5  23-158.440 530.113   3
  -2  -5  23 590.440 640.073   3
  -2   5  23-98.7049 706.925   0
  -2   5  22 344.729 528.194   3
  -2  -5  22 404.907 626.175   3
  -2   5  22 564.611 679.705   0
  -2   5  21 5792.44 608.329   3
  -2   5  21 6177.74 714.057   0
  -2  -5  21 6938.80 708.038   3
  -2  -5  20 5409.75 649.217   3
  -2   5  20 5794.24 584.055   3
  -2   5  20 5609.95 686.224   0
  -2  -5  19 1751.85 560.880   3
  -2   5  19 1284.83 653.784   0
  -2   5  19 1913.59 488.365   3
  -2  -5  18 1642.76 558.389   3
  -2   5  18 2029.00 470.900   3
  -2  -5  18 2253.05 645.289   0
  -2   5  18 1999.89 680.379   0
   2   5 -17 25.2088 254.153   1
  -2   5  17-53.5895 426.961   3
  -2  -5  17 561.713 610.288   0
  -2  -5  17 20.6856 504.103   3
  -2   5  16 15318.0 615.416   3
  -2  -5  16 15262.2 723.287   3
  -2  -5  16 13894.6 743.737   0
   2   5 -16 14942.2 450.540   1
  -2  -5  15 35846.9 919.106   3
  -2   5  15 38366.7 819.426   3
  -2  -5  15 39194.4 1031.42   0
   2   5 -15 38038.0 642.496   1
  -2  -5  14 429.451 470.602   3
   2   5 -14 191.710 292.549   1
  -2   5  14 408.245 359.590   3
  -2  -5  14 1018.48 565.721   0
  -2  -5  13 1237.14 533.834   0
  -2   5  13 822.240 365.854   3
   2   5 -13 946.267 318.424   1
  -2  -5  13 1334.94 461.993   3
  -2  -5  12 206.613 424.984   3
  -2   5  12 186.120 328.820   3
  -2  -5  12 383.488 514.763   0
   2   5 -12 193.005 299.096   1
  -2  -5  11 55556.7 927.971   3
  -2   5  11 53026.3 745.172   3
  -2  -5  11 54952.1 1002.81   0
  -2   5  10 185350. 1231.69   3
  -2  -5  10 191092. 1538.81   3
  -2  -5  10 187674. 1648.84   0
  -2   5   9 160965. 1073.43   3
   2  -5  -9 157066. 1071.29   3
  -2  -5   9 162268. 1480.72   0
  -2  -5   9 164074. 1369.83   3
  -2   5   8 47861.3 560.665   3
  -2  -5   8 48811.5 878.536   0
   2  -5  -8 48220.0 555.692   3
  -2  -5   8 46480.2 752.578   3
  -2  -5   7 13423.7 554.161   0
  -2   5   7 13165.7 302.489   3
   2  -5  -7 13445.2 292.730   3
  -2  -5   7 13296.2 470.658   3
   2  -5  -6 57642.8 466.442   3
  -2  -5   6 57285.7 745.523   3
  -2   5   6 58168.9 473.533   3
   2  -5  -5 104662. 507.845   3
  -2  -5   5 101874. 930.711   3
  -2  -5   4 37918.2 599.967   3
  -2  -5   3 7867.12 387.423   3
  -2  -5   2 126775. 2176.66   2
   2  -5  -2 128757. 1074.92   2
   2   5  -2 124278. 963.096   0
   2  -5  -1 8461.74 472.272   2
   2  -5  -1 7740.71 152.552   3
  -2   5   1 8366.49 168.738   3
   2   5   0 1831.13 131.387   2
  -2   5   0 2089.82 167.657   3
   2  -5   0 2109.50 415.097   2
   2  -5   0 2116.33 160.244   3
   2  -5   1 30030.6 391.685   3
  -2   5  -1 30366.5 519.269   1
  -2   5  -1 30134.1 391.108   3
   2  -5   1 30523.9 607.873   2
  -2   5  -2 48235.0 526.479   3
   2  -5   2 49318.3 548.926   3
  -2   5  -2 48176.7 606.780   1
   2  -5   3 84098.4 760.673   3
  -2   5  -3 83892.8 738.955   3
  -2   5  -3 84462.4 759.116   1
  -2   5  -4 47681.3 570.418   1
   2  -5   4 47777.6 643.502   3
   2   5   4 49537.3 755.681   3
   2  -5   5 178332. 1248.69   3
   2   5   5 185006. 1406.18   3
  -2   5  -5 185105. 1048.96   1
   2  -5   6 64817.4 844.573   3
   2   5   6 63464.5 902.432   3
  -2   5  -6 66367.7 636.407   1
  -2   5  -7 69069.1 627.568   1
   2  -5   7 66924.6 897.962   3
   2   5   7 67067.5 961.332   3
  -2   5  -7 65954.0 558.799   0
  -2   5  -8 100497. 729.068   1
  -2   5  -8 100313. 721.327   0
   2  -5   8 97996.3 1139.16   3
   2   5   8 96849.7 1169.86   3
   2   5   9 72222.4 1083.44   3
   2  -5   9 72510.6 1047.77   3
  -2   5  -9 71125.4 652.291   0
  -2   5  -9 73953.9 591.090   1
   2  -5  10 2780.88 465.614   3
   2   5  10 3112.65 494.808   3
   2  -5  11 16837.6 691.012   3
   2   5  11 16982.7 686.046   3
   2  -5  12 416.800 536.608   3
   2   5  12 240.022 505.194   3
   2  -5  13 43423.4 1028.67   3
   2   5  13 42895.1 1022.73   3
   2  -5  14 30605.7 932.024   3
   2   5  14 30985.6 960.980   3
   2  -5  15 17983.7 844.250   3
   2   5  15 17805.1 839.009   3
   2   5  16 2931.28 662.791   3
   2  -5  16 3208.02 691.965   3
   2   5  17 1771.96 655.239   3
   2  -5  17 1299.63 607.282   3
   2  -5  18 6041.04 703.719   3
   2   5  18 6175.97 710.744   3
   2   5  18 5751.04 464.438   0
   2  -5  19 18357.3 959.803   3
   2   5  19 17591.8 902.729   3
   2  -5  20 1720.29 703.505   3
   2   5  20 1990.26 712.109   3
   2   5  21 672.983 659.148   3
   2  -5  21 812.261 621.824   3
   2  -5  22 11093.7 946.404   3
   2   5  22 11720.7 890.038   3
   2   5  23-96.0133 740.837   3
   2  -5  23-176.796 728.504   3
   2   5  24 2027.60 758.774   3
   2  -5  24 2079.47 713.624   3
   2  -5  25 242.595 828.297   3
   2   5  25 884.938 684.759   3
   2   5  26 47.8222 675.521   3
  -2   6  27 664.301 718.165   0
  -2  -6  27-12.1156 714.220   3
  -2   6  26 4367.44 846.777   0
  -2  -6  26 4364.33 796.070   3
  -2  -6  25 551.080 686.955   3
  -2   6  25-661.808 731.121   0
  -2  -6  24 258.764 648.987   3
  -2   6  24 553.908 577.584   3
  -2   6  24-630.515 727.967   0
  -2   6  23 371.988 704.810   0
  -2   6  23 218.348 527.756   3
  -2  -6  23 501.007 632.179   3
  -2  -6  22 13664.5 880.988   3
  -2   6  22 13580.0 760.168   3
  -2   6  22 13738.2 914.374   0
  -2  -6  21 1638.95 650.870   3
  -2   6  21 1130.18 504.566   3
  -2   6  21 1125.62 629.590   0
  -2   6  20 583.590 599.546   0
  -2   6  20 601.362 472.298   3
  -2  -6  20 601.195 573.338   3
  -2  -6  19 1923.44 572.385   3
  -2   6  19 2201.21 492.968   3
  -2  -6  18 835.608 561.056   3
  -2   6  18 1713.60 454.840   3
   2   6 -17 161.133 263.919   1
  -2  -6  17 131.242 502.893   3
  -2   6  17 31.6878 403.883   3
  -2  -6  16 24515.1 863.987   3
  -2   6  16 25091.8 723.704   3
   2   6 -16 24123.8 537.738   1
  -2  -6  15 2048.47 533.105   3
  -2   6  15 1579.65 411.296   3
   2   6 -15 1068.03 308.457   1
  -2  -6  14 8065.83 592.748   3
  -2   6  14 7894.28 483.868   3
   2   6 -14 7573.34 398.525   1
   2   6 -13 19032.0 515.019   1
  -2   6  13 19855.3 587.324   3
  -2  -6  13 19594.8 725.259   3
  -2   6  12 52427.3 791.424   3
  -2  -6  12 52234.7 970.348   3
  -2  -6  11 320.286 436.574   3
  -2   6  11 13.6843 269.929   3
  -2   6  10 18774.5 477.424   3
  -2  -6  10 17965.4 621.003   3
   2  -6  -9 2631.44 255.749   3
  -2   6   9 3455.62 290.844   3
  -2  -6   9 3363.88 448.601   3
   2  -6  -8 148605. 945.237   3
  -2   6   8 147953. 952.735   3
  -2  -6   8 150432. 1304.35   3
   2  -6  -7 7145.73 236.623   3
  -2   6   7 7414.22 256.595   3
  -2  -6   7 6874.17 410.836   3
   2  -6  -6 17215.0 283.075   3
  -2  -6   6 16738.0 507.513   3
  -2  -6   5 883.249 314.790   3
   2  -6  -5 671.413 111.247   3
   2  -6  -4 93140.6 443.214   3
  -2  -6   4 94423.3 916.941   3
  -2  -6   3 170.569 329.845   3
   2  -6  -3 38.0670 56.2703   3
   2  -6  -3 252.967 71.6380   3
   2  -6  -2 22248.8 582.146   2
  -2  -6   2 21794.9 212.829   2
   2  -6  -1 1043.07 311.161   2
   2  -6  -1 1295.62 127.047   3
  -2   6   1 1385.52 138.043   3
   2  -6   0 288.118 404.707   2
   2  -6   0 418.228 150.196   3
  -2   6   0 473.009 147.941   3
   2  -6   1 112.785 190.227   3
  -2   6  -1 99.6861 167.441   3
   2  -6   1 215.455 385.753   2
   2  -6   2 118633. 833.760   3
  -2   6  -2 116636. 824.152   3
  -2   6  -3 804.255 197.870   3
   2  -6   3 867.700 247.691   3
   2  -6   4 18355.1 462.644   3
   2   6   5 5986.01 440.987   3
   2  -6   5 6517.08 377.778   3
  -2   6  -5 6375.62 284.192   1
   2  -6   6 38937.8 689.387   3
   2   6   6 38860.6 764.703   3
  -2   6  -6 40149.3 529.547   1
  -2   6  -7 21913.5 405.437   1
   2  -6   7 21816.0 602.711   3
   2   6   7 21338.9 645.354   3
  -2   6  -8 24440.5 410.763   1
  -2   6  -8 25258.2 421.678   0
   2   6   8 24479.3 694.551   3
   2  -6   8 24452.4 640.625   3
  -2   6  -9 395.288 201.594   0
   2   6   9 333.568 417.744   3
   2  -6   9 412.708 420.479   3
  -2   6  -9 331.998 168.695   1
  -2   6 -10 62266.5 681.053   0
   2  -6  10 61660.5 1031.03   3
  -2   6 -10 65557.7 575.212   1
   2   6  10 63996.8 1089.44   3
   2   6  11 3275.42 531.881   3
   2  -6  11 3155.34 542.973   3
  -2   6 -11 3515.85 176.573   1
   2  -6  12 24871.6 805.189   3
   2   6  12 25467.9 849.465   3
   2  -6  13 588.358 569.953   3
   2   6  13 660.274 555.340   3
   2  -6  14 6469.86 659.475   3
   2   6  14 6058.59 663.381   3
   2   6  15 1065.26 550.546   3
   2  -6  15 736.830 594.453   3
   2   6  16 39486.4 1084.58   3
   2  -6  16 39038.3 1127.93   3
   2   6  17 443.543 566.741   3
   2  -6  17 237.206 563.981   3
   2  -6  18 536.451 657.948   3
   2   6  18 277.112 599.730   3
   2  -6  19 890.825 679.875   3
   2   6  19 2050.13 699.336   3
   2   6  20 27322.5 1058.27   3
   2  -6  20 27593.6 1077.86   3
   2   6  21 1071.21 707.119   3
   2  -6  21 1202.61 747.450   3
   2  -6  22 5043.70 776.635   3
   2   6  22 6199.30 760.617   3
   2  -6  23 37.8717 731.105   3
   2   6  23-24.8330 735.546   3
   2  -6  24 4190.91 892.334   3
   2   6  24 2744.57 766.240   3
   2  -6  25 1176.73 685.877   3
   2   6  25 724.808 670.280   3
   2   6  26 7928.10 910.744   3
  -2   7  27 109.295 684.687   0
  -2  -7  27-249.851 678.263   3
  -2  -7  26 4085.66 753.849   3
  -2   7  26 3307.99 809.582   0
  -2  -7  25 762.884 633.077   3
  -2   7  25-25.6909 700.320   0
  -2   7  24 6257.69 822.942   0
  -2  -7  24 6762.99 788.534   3
  -2   7  24 6360.55 680.355   3
  -2   7  23-322.270 654.356   0
  -2  -7  23 38.7117 595.465   3
  -2   7  23 148.226 525.222   3
  -2  -7  22 991.736 638.020   3
  -2   7  22 1458.56 535.867   3
  -2   7  22 1029.58 632.431   0
  -2   7  21 789.866 506.453   3
  -2  -7  21 571.307 640.547   3
  -2   7  21 539.483 609.951   0
  -2  -7  20 7121.46 722.818   3
  -2   7  20 7241.70 604.238   3
  -2  -7  19 128.682 556.637   3
  -2   7  19 936.017 463.016   3
  -2   7  18 2059.58 469.585   3
  -2  -7  18 2055.64 613.976   3
   2   7 -17 1367.11 296.908   1
  -2  -7  17 1976.98 554.832   3
  -2   7  17 1299.66 440.886   3
  -2  -7  16 9820.93 691.868   3
   2   7 -16 8217.54 401.426   1
  -2   7  16 8722.80 527.227   3
  -2  -7  15 4068.36 591.458   3
  -2   7  15 4870.01 456.111   3
   2   7 -15 4003.13 359.191   1
  -2  -7  14 5408.63 593.345   3
  -2   7  14 5661.77 445.178   3
   2   7 -14 5904.27 388.394   1
  -2   7  13 16.5945 350.931   3
  -2  -7  13 687.881 509.769   3
  -2   7  12 9892.45 457.411   3
  -2  -7  12 9517.70 587.263   3
  -2   7  11 15607.6 479.133   3
  -2  -7  11 14797.2 635.835   3
  -2  -7  10 136333. 1385.41   3
  -2   7  10 140511. 1106.74   3
  -2   7   9 23092.1 477.835   3
   2  -7  -9 21382.3 444.680   3
  -2  -7   9 22711.5 653.571   3
   2  -7  -8 45726.8 553.173   3
  -2   7   8 47224.9 578.649   3
  -2  -7   8 46063.0 808.552   3
   2  -7  -7 4169.02 215.098   3
  -2  -7   7 4927.08 412.612   3
  -2  -7   6 407450. 2018.66   3
   2  -7  -6 413111. 5183.98   3
   2  -7  -5 136052. 681.780   3
  -2  -7   5 134783. 1160.88   3
  -2  -7   4 11703.8 439.912   3
   2  -7  -4 12411.3 209.699   3
   2  -7  -3 6673.98 163.099   3
  -2  -7   3 6387.13 405.879   3
   2  -7  -2 66783.9 447.175   3
   2  -7  -2 66920.0 860.204   2
   2  -7  -1 6046.18 448.397   2
   2  -7  -1 5916.21 197.905   3
  -2   7   1 5799.84 193.015   3
   2  -7   0 161352. 1216.29   2
  -2   7   0 159112. 835.898   3
   2  -7   0 159201. 824.221   3
   2  -7   1 755.114 189.934   3
  -2   7  -1 627.429 182.829   3
   2  -7   1 583.918 305.661   2
   2  -7   2 874.618 225.734   3
  -2   7  -2 916.043 187.882   3
   2  -7   3 77978.9 780.437   3
   2  -7   4 299860. 1584.26   3
   2  -7   5 501.325 310.814   3
   2  -7   6 27779.6 616.364   3
   2   7   7 5238.94 464.108   3
   2  -7   7 5742.09 430.202   3
   2  -7   8 28716.3 696.811   3
  -2   7  -8 29284.7 470.000   0
   2   7   8 28846.2 772.703   3
  -2   7  -8 29205.8 468.983   1
   2  -7   9 7211.09 499.951   3
  -2   7  -9 7323.44 299.064   0
  -2   7  -9 7468.11 277.410   1
   2   7   9 7245.42 568.850   3
   2  -7  10 10867.2 621.720   3
   2   7  10 11317.1 611.225   3
  -2   7 -10 10891.9 306.641   1
   2  -7  11 7669.43 575.264   3
  -2   7 -11 7146.98 252.077   1
   2   7  11 7591.17 630.146   3
  -2   7 -12 16335.0 292.589   1
   2   7  12 16062.7 771.166   3
   2  -7  12 17629.8 760.819   3
   2   7  13 14147.0 742.483   3
   2  -7  13 14859.5 756.376   3
   2  -7  14 24676.8 897.800   3
   2   7  14 23665.6 871.316   3
   2  -7  15 11106.7 762.555   3
   2   7  15 10498.6 721.676   3
   2   7  16 2882.75 670.013   3
   2  -7  16 2719.03 680.235   3
   2  -7  17 534.082 614.044   3
   2   7  17 1153.66 659.796   3
   2   7  18 18867.3 926.104   3
   2  -7  18 17476.9 933.251   3
   2  -7  19 302.686 585.619   3
   2   7  19 407.575 604.621   3
   2  -7  20 931.277 723.278   3
   2   7  20 926.352 624.422   3
   2   7  21 1891.90 725.986   3
   2  -7  21 1126.70 633.061   3
   2  -7  22 9669.93 932.118   3
   2   7  22 9616.73 826.373   3
   2  -7  23 268.037 722.487   3
   2   7  23 251.731 727.198   3
   2  -7  24 2734.44 833.769   3
   2   7  24 2909.57 750.806   3
   2  -7  25 602.569 827.382   3
   2   7  25-81.1541 669.236   3
   2   7  26-25.8378 796.798   3
  -2  -8  26 1284.58 761.177   3
  -2   8  26 35.9497 691.645   0
  -2   8  25 256.193 663.451   0
  -2  -8  25 456.391 714.807   3
  -2  -8  24 3924.03 772.599   3
  -2   8  24 3469.95 722.619   0
  -2   8  23 1927.73 672.233   0
  -2  -8  23 2220.60 725.544   3
  -2   8  23 1745.98 552.957   3
  -2   8  22 1972.40 536.042   3
  -2   8  22 1864.36 644.657   0
  -2  -8  22 2012.25 642.832   3
  -2   8  21 1237.12 508.099   3
  -2  -8  21 1032.17 598.793   3
  -2   8  20 815.263 478.523   3
  -2  -8  20 266.787 633.367   3
  -2  -8  19 2292.30 627.586   3
  -2   8  19 2803.56 488.424   3
  -2   8  18 8910.30 587.245   3
  -2  -8  18 9318.12 733.126   3
  -2   8  17 12886.1 620.594   3
  -2  -8  17 13480.8 759.164   3
  -2   8  16 1838.10 428.144   3
   2   8 -16 1856.32 318.907   1
  -2  -8  16 1729.51 593.394   3
  -2  -8  15 214.069 553.223   3
   2   8 -15 401.806 310.226   1
  -2   8  15 419.884 388.323   3
  -2   8  14 3861.02 419.745   3
  -2  -8  14 4583.11 591.977   3
  -2  -8  13 74466.0 1232.76   3
  -2   8  13 71940.5 980.311   3
  -2  -8  12 48478.5 990.307   3
  -2   8  12 47788.6 784.768   3
  -2   8  11 8961.86 412.717   3
  -2  -8  11 9316.79 597.069   3
  -2  -8  10 4042.36 510.989   3
  -2   8  10 3902.15 318.046   3
  -2  -8   9 39311.7 814.112   3
  -2   8   9 39447.5 600.582   3
   2  -8  -8 32839.5 495.883   3
  -2  -8   8 33897.3 760.627   3
   2  -8  -7 167341. 966.170   3
  -2  -8   7 167706. 1427.11   3
   2  -8  -6 5431.94 226.463   3
  -2  -8   6 6289.39 426.596   3
   2  -8  -5 12226.5 260.369   3
  -2  -8   5 12781.0 492.152   3
  -2  -8   4 57196.8 819.842   3
   2  -8  -4 57115.5 470.989   3
   2  -8  -3 212.150 128.149   3
  -2  -8   3 70.3247 324.927   3
   2  -8  -2 52572.7 453.757   3
   2  -8  -2 51808.3 799.578   2
   2  -8  -1 816.440 371.579   2
   2  -8  -1 898.459 173.159   3
   2  -8   0 22067.1 370.117   3
  -2   8   0 22488.5 370.821   3
   2  -8   0 22045.3 549.683   2
   2  -8   1 90697.9 978.755   2
  -2   8  -1 90148.5 739.307   3
   2  -8   1 89400.3 738.007   3
  -2   8  -2 21816.5 426.125   3
   2  -8   2 23313.7 583.569   2
   2  -8   2 22462.7 448.752   3
   2  -8   3 18546.0 456.299   3
   2  -8   4 1520.76 310.702   3
   2  -8   5 9647.27 438.277   3
   2  -8   6 61625.4 878.318   3
   2  -8   7 49188.1 836.720   3
   2  -8   8 60251.5 961.748   3
   2   8   8 62400.2 1025.22   3
   2  -8   9 825.206 431.431   3
  -2   8  -9 882.462 211.175   1
   2   8   9 693.381 450.826   3
  -2   8 -10 25726.6 446.860   1
   2  -8  10 25244.9 751.425   3
   2   8  10 25614.6 788.698   3
   2  -8  11 97523.7 1345.66   3
   2   8  11 102156. 1403.56   3
  -2   8 -11 101349. 790.560   1
   2  -8  12 26966.3 883.588   3
  -2   8 -12 26514.2 410.194   1
   2   8  12 26911.0 886.126   3
   2  -8  13 13098.9 741.751   3
   2   8  13 14326.7 754.961   3
   2   8  14 1460.01 546.010   3
   2  -8  14 1418.83 594.177   3
   2   8  15 13883.4 819.878   3
   2  -8  15 15463.8 865.197   3
   2   8  16 17860.1 871.685   3
   2  -8  16 16166.8 831.882   3
   2  -8  17 12690.6 859.196   3
   2   8  17 14358.8 812.275   3
   2  -8  18 539.596 603.421   3
   2   8  18 222.745 566.388   3
   2  -8  19-197.927 700.944   3
   2   8  19 288.134 610.115   3
   2  -8  20 5789.38 727.918   3
   2   8  20 5183.63 773.472   3
   2   8  21 2593.23 713.230   3
   2  -8  21 2333.19 781.246   3
   2   8  22 5174.30 734.767   3
   2  -8  22 6043.53 781.022   3
   2  -8  23 212.342 798.070   3
   2   8  23 395.218 721.605   3
   2  -8  24 2403.04 737.713   3
   2   8  24 1956.74 727.011   3
   2   8  25 3740.23 798.703   3
   2  -8  25 2987.99 908.847   3
  -2  -9  26 192.759 740.893   3
  -2   9  26 367.452 773.340   0
  -2  -9  25 3840.12 734.532   3
  -2   9  25 3921.63 849.597   0
  -2  -9  24 78.8914 630.023   3
  -2   9  24 197.438 760.901   0
  -2  -9  23 696.134 650.677   3
  -2   9  23 203.184 524.923   3
  -2   9  23 612.076 762.820   0
  -2   9  22-86.3815 698.802   0
  -2  -9  22 174.514 664.297   3
  -2   9  22 158.055 490.388   3
  -2  -9  21 3100.78 696.619   3
  -2   9  21 3195.48 546.101   3
  -2  -9  20 764.160 586.440   3
  -2   9  20 741.797 476.438   3
  -2   9  19 12943.5 668.346   3
  -2  -9  19 12621.3 845.379   3
  -2   9  18 3545.11 507.039   3
  -2  -9  18 3519.57 626.804   3
  -2  -9  17 21564.2 910.702   3
  -2   9  17 22600.2 736.036   3
  -2  -9  16 2079.54 605.441   3
  -2   9  16 2092.27 435.759   3
   2   9 -16 1926.52 333.547   1
  -2  -9  15 35125.1 976.917   3
  -2   9  15 34925.2 801.103   3
  -2  -9  14 9344.27 651.463   3
  -2   9  14 8723.90 508.372   3
  -2   9  13 45619.0 814.470   3
  -2  -9  13 46642.9 1047.30   3
  -2   9  12 23479.1 610.367   3
  -2  -9  12 22395.2 782.391   3
  -2   9  11 56496.8 797.009   3
  -2  -9  11 56466.5 1050.23   3
  -2  -9  10 6578.77 549.306   3
  -2  -9   9 38354.9 853.339   3
  -2  -9   8 57845.2 952.732   3
   2  -9  -8 58939.1 661.073   3
   2  -9  -7 11497.4 323.372   3
  -2  -9   7 12287.6 536.903   3
  -2  -9   6 23500.5 621.410   3
   2  -9  -6 21861.7 376.101   3
  -2  -9   5 42415.5 763.879   3
   2  -9  -5 43374.1 475.875   3
  -2  -9   4 6767.23 450.480   3
   2  -9  -4 6232.28 215.378   3
  -2  -9   3 1835.37 363.173   3
   2  -9  -3 1671.85 178.093   3
   2  -9  -2 8900.87 256.515   3
   2  -9  -2 8866.75 446.857   2
  -2  -9   2 8794.26 471.841   3
   2  -9  -1 10499.4 286.514   3
   2  -9  -1 10887.4 461.123   2
   2  -9   0 123873. 1139.68   2
  -2   9   0 124769. 863.418   3
   2  -9   0 124090. 862.969   3
  -2   9  -1 82651.6 758.490   3
   2  -9   1 82642.3 758.740   3
   2  -9   1 81006.9 956.484   2
   2  -9   2 25185.2 498.044   3
   2  -9   2 25379.2 616.617   2
   2  -9   3 78697.0 854.700   3
   2  -9   4 45054.4 702.504   3
   2  -9   5 21766.8 563.901   3
   2  -9   6 399.061 341.655   3
   2  -9   7 82650.0 1081.25   3
   2  -9   8 4510.47 476.250   3
   2   9   9 36043.6 881.187   3
   2  -9   9 34863.8 820.235   3
   2  -9  10 2694.51 497.525   3
   2   9  10 2969.45 559.020   3
   2   9  11 9019.25 631.406   3
   2  -9  11 9157.03 655.430   3
  -2   9 -11 9241.73 327.368   1
   2  -9  12 2539.29 598.804   3
   2   9  12 2284.76 583.452   3
  -2   9 -12 2009.96 228.891   1
   2   9  13 65202.4 1264.74   3
   2  -9  13 66788.1 1270.23   3
   2  -9  14 3271.39 607.836   3
   2   9  14 3582.78 614.244   3
   2  -9  15 13055.1 845.734   3
   2   9  15 12731.6 787.312   3
   2  -9  16 6627.67 737.884   3
   2   9  16 6393.45 690.468   3
   2   9  17 15094.9 882.011   3
   2  -9  17 13496.1 837.446   3
   2  -9  18 4463.76 761.787   3
   2   9  18 3962.51 722.804   3
   2  -9  19 8272.08 760.563   3
   2   9  19 9049.16 827.115   3
   2  -9  20 368.793 722.006   3
   2   9  20 265.201 667.198   3
   2   9  21 186.338 601.556   3
   2  -9  21 397.855 613.815   3
   2  -9  22 3028.51 832.740   3
   2   9  22 2618.64 741.626   3
   2   9  23 9731.96 936.929   3
   2  -9  23 9245.98 892.219   3
   2  -9  24 292.148 807.935   3
   2   9  24 593.462 700.217   3
   2  -9  25 403.492 766.505   3
   2   9  25 192.844 724.562   3
  -2  10  26 481.140 668.233   0
  -2 -10  26 499.370 662.111   3
  -2 -10  25 1093.04 698.042   3
  -2  10  25-451.284 673.547   0
  -2 -10  24 375.867 698.072   3
  -2  10  24-69.4108 675.380   0
  -2  10  23 4031.57 789.342   0
  -2 -10  23 4152.26 783.232   3
  -2 -10  22 130.333 640.500   3
  -2  10  22 86.6520 497.760   3
  -2 -10  21 88.5688 599.717   3
  -2  10  21-47.1202 473.643   3
  -2 -10  20 405.024 642.212   3
  -2  10  20 470.828 464.237   3
  -2 -10  19 14761.7 836.131   3
  -2  10  19 14724.6 685.408   3
  -2 -10  18-28.1863 635.331   3
  -2  10  18 159.103 433.033   3
  -2  10  17 12566.3 631.102   3
  -2 -10  17 13548.0 784.327   3
  -2 -10  16 1614.93 565.585   3
  -2  10  16 1848.18 426.327   3
  -2  10  15 4722.40 456.025   3
  -2 -10  15 4831.77 638.216   3
  -2  10  14 14233.6 554.911   3
  -2 -10  14 14960.8 754.450   3
  -2 -10  13 58728.6 1152.62   3
  -2  10  13 57649.1 913.718   3
  -2  10  12 2942.69 380.246   3
  -2 -10  12 3573.22 592.952   3
  -2 -10  11 5083.00 555.956   3
  -2 -10  10 295.768 478.322   3
  -2 -10   9 38796.4 864.381   3
   2 -10  -8 20874.4 440.189   3
  -2 -10   8 22790.5 707.694   3
  -2 -10   7 206698. 1691.10   3
   2 -10  -7 208420. 1181.14   3
   2 -10  -6 17761.1 365.747   3
  -2 -10   6 18042.4 595.077   3
  -2 -10   5 30375.7 701.186   3
   2 -10  -5 30248.9 436.671   3
  -2 -10   4 24468.5 643.190   3
   2 -10  -4 24485.4 394.522   3
   2 -10  -3 54217.8 553.012   3
  -2 -10   3 51010.1 846.256   3
   2 -10  -2 22938.6 639.180   2
  -2 -10   2 22460.1 630.439   3
   2 -10  -2 22201.4 393.532   3
   2 -10  -1 31603.6 666.995   2
   2 -10  -1 34006.1 488.201   3
   2 -10   0 60414.1 875.647   2
  -2  10   0 59103.3 643.086   3
   2 -10   0 58373.5 652.079   3
   2 -10   1 100079. 1065.57   2
   2 -10   1 98737.7 872.177   3
   2 -10   2 2691.26 419.377   2
   2 -10   2 3048.05 304.139   3
   2 -10   3 11270.2 419.007   3
   2 -10   4 33691.3 644.845   3
   2 -10   5 28311.4 637.631   3
   2 -10   6 30159.3 699.436   3
   2 -10   7 91470.6 1145.81   3
   2 -10   8 3148.36 488.305   3
   2 -10   9 9746.96 597.952   3
   2 -10  10 746.058 500.327   3
   2 -10  11 168432. 1786.46   3
   2  10  11 166313. 1802.71   3
   2  10  12 868.352 572.474   3
   2 -10  12 669.338 564.394   3
   2  10  13 647.829 599.572   3
   2 -10  13 768.367 618.618   3
   2 -10  14-176.859 611.686   3
   2  10  14 222.240 590.032   3
   2 -10  15 39354.2 1111.75   3
   2  10  15 40793.3 1112.37   3
   2 -10  16 487.447 638.748   3
   2  10  16 589.216 644.077   3
   2 -10  17 23982.7 1019.52   3
   2  10  17 24508.2 962.424   3
   2 -10  18 4286.25 680.215   3
   2  10  18 4110.95 662.203   3
   2 -10  19 1346.25 736.995   3
   2  10  19 1363.54 609.254   3
   2 -10  20 730.215 664.570   3
   2  10  20 335.950 589.013   3
   2  10  21 3649.49 710.904   3
   2 -10  21 4767.62 812.410   3
   2 -10  22 509.502 770.096   3
   2  10  22 339.810 733.880   3
   2 -10  23 1758.37 734.909   3
   2  10  23 1263.36 718.874   3
   2 -10  24 1295.88 860.870   3
   2  10  24 1354.11 744.470   3
   2  10  25 1372.26 746.750   3
  -2 -11  26 84.2471 746.470   3
  -2  11  26-193.045 767.516   0
  -2  11  25 1211.71 809.063   0
  -2 -11  25 1318.03 767.813   3
  -2  11  24 2108.83 813.810   0
  -2 -11  24 3509.65 796.338   3
  -2 -11  23 386.083 627.939   3
  -2 -11  22 1883.70 679.582   3
  -2 -11  21 2146.90 713.340   3
  -2  11  21 2581.92 533.516   3
  -2 -11  20 1744.03 600.747   3
  -2  11  20 2239.72 507.222   3
  -2 -11  19 2977.53 694.595   3
  -2  11  19 3143.86 518.944   3
  -2  11  18 7823.09 565.293   3
  -2 -11  18 8618.67 741.764   3
  -2 -11  17 3220.70 684.314   3
  -2  11  17 3163.29 488.408   3
  -2 -11  16 2144.70 632.132   3
  -2  11  16 2008.27 430.092   3
  -2 -11  15 14745.7 788.589   3
  -2  11  15 15786.0 607.535   3
  -2 -11  14 20420.7 826.852   3
  -2 -11  13 2872.15 586.827   3
  -2 -11  12 6254.83 613.764   3
  -2 -11  11 69735.4 1194.48   3
  -2 -11  10 5106.76 548.759   3
  -2 -11   9 20480.6 729.448   3
  -2 -11   8 5252.74 542.682   3
  -2 -11   7 8135.03 555.316   3
   2 -11  -7 6807.96 299.949   3
  -2 -11   6 15599.7 630.968   3
   2 -11  -6 14771.8 369.376   3
   2 -11  -5 91068.7 772.121   3
  -2 -11   5 93364.7 1171.71   3
  -2 -11   4 418.017 436.494   3
   2 -11  -4 221.426 206.413   3
   2 -11  -3 1823.74 229.302   3
  -2 -11   3 1625.80 393.970   3
   2 -11  -2 27943.1 467.452   3
   2 -11  -2 28132.4 679.016   2
  -2 -11   2 28218.0 706.417   3
   2 -11  -1 71700.0 957.238   2
   2 -11  -1 68960.6 714.820   3
   2 -11   0 26019.2 667.704   2
   2 -11   0 25284.7 484.094   3
   2 -11   1 20522.3 620.315   2
   2 -11   1 20749.4 478.651   3
   2 -11   2 20431.6 619.835   2
   2 -11   2 20279.8 496.776   3
   2 -11   3 3504.70 345.917   3
   2 -11   3 2693.89 395.302   2
   2 -11   4 13828.6 489.343   3
   2 -11   5 3933.23 393.669   3
   2 -11   6 10958.7 512.936   3
   2 -11   7 25969.3 698.274   3
   2 -11   8 3278.68 493.873   3
   2 -11   9 106333. 1371.30   3
   2 -11  10 10881.2 635.892   3
   2 -11  11 731.636 491.842   3
   2 -11  12 5051.34 597.466   3
   2  11  13 45460.9 1119.24   3
   2 -11  13 43217.5 1081.61   3
   2 -11  14 1066.53 656.558   3
   2  11  14 1453.37 623.655   3
   2 -11  15 31740.0 1071.97   3
   2  11  15 33045.5 1064.39   3
   2  11  16 1846.40 593.336   3
   2 -11  16 1963.19 655.774   3
   2 -11  17 783.320 576.742   3
   2  11  17 1291.79 644.821   3
   2 -11  18 19817.4 1008.95   3
   2  11  18 17698.8 947.592   3
   2 -11  19 11364.2 887.421   3
   2  11  19 10102.9 823.420   3
   2 -11  20 67.8284 629.726   3
   2  11  20 116.133 647.736   3
   2 -11  21 266.750 767.997   3
   2  11  21 533.003 710.104   3
   2  11  22 6123.52 854.268   3
   2 -11  22 4748.40 783.908   3
   2 -11  23 2104.21 823.397   3
   2  11  23 2765.98 725.741   3
   2 -11  24 4660.29 909.196   3
   2  11  24 4103.72 826.749   3
   2  11  25 268.414 742.867   3
  -2  12  25 24.1037 689.895   0
  -2 -12  25-201.871 752.670   3
  -2 -12  24-125.164 660.936   3
  -2 -12  23 443.685 644.806   3
  -2 -12  22 9790.93 900.871   3
  -2 -12  21 531.148 663.683   3
  -2  12  21 240.539 467.140   3
  -2 -12  20 2414.34 661.348   3
  -2  12  20 1456.16 476.042   3
  -2 -12  19 189.015 638.433   3
  -2  12  19 2.27525 419.802   3
  -2 -12  18 9307.73 782.975   3
  -2 -12  17 13421.0 806.856   3
  -2 -12  16 2698.41 653.151   3
  -2 -12  15 1175.24 628.597   3
  -2 -12  14 13876.4 783.913   3
  -2 -12  13 192.722 559.847   3
  -2 -12  12 455.735 502.048   3
  -2 -12  11 2506.75 577.721   3
  -2 -12  10 1323.70 497.475   3
  -2 -12   9 94318.6 1319.04   3
  -2 -12   8 156339. 1613.78   3
  -2 -12   7 2101.15 522.199   3
  -2 -12   6 19615.9 671.570   3
  -2 -12   5 3123.71 515.970   3
   2 -12  -5 2544.06 240.681   3
   2 -12  -4 140744. 1008.23   3
  -2 -12   4 141073. 1432.56   3
  -2 -12   3 6683.13 536.375   3
   2 -12  -3 6512.88 309.762   3
   2 -12  -2 113531. 927.842   3
  -2 -12   2 112532. 1271.03   3
   2 -12  -2 116831. 1255.86   2
   2 -12  -1 14726.3 573.744   2
   2 -12  -1 15149.4 420.283   3
   2 -12   0 121783. 1024.27   3
   2 -12   0 122399. 1236.57   2
   2 -12   1 55727.8 752.628   3
   2 -12   1 54242.0 866.372   2
   2  12   2 95519.5 565.397   2
   2 -12   2 94968.9 1128.57   2
   2 -12   2 97199.3 997.669   3
   2 -12   3 25144.1 591.754   3
   2 -12   3 25865.5 662.604   2
   2 -12   4 77.8475 333.484   3
   2 -12   5 16731.9 571.577   3
   2 -12   6 57803.1 942.420   3
   2 -12   7 3419.69 451.228   3
   2 -12   8 6582.83 556.750   3
   2 -12   9 11416.0 621.297   3
   2 -12  10 6732.26 590.612   3
   2 -12  11 201.342 520.547   3
   2 -12  12 7234.92 671.380   3
   2 -12  13 6505.74 695.306   3
   2 -12  14 38344.0 1098.62   3
   2 -12  15 5371.16 677.647   3
   2 -12  16 27683.2 1026.96   3
   2  12  16 28931.1 1047.15   3
   2 -12  17 4968.43 752.738   3
   2  12  17 4202.69 651.919   3
   2  12  18 704.832 624.201   3
   2 -12  18 870.980 678.883   3
   2 -12  19 101.413 601.463   3
   2  12  19 645.140 669.034   3
   2 -12  20 6933.88 863.429   3
   2  12  20 7572.88 838.663   3
   2 -12  21 2834.26 819.127   3
   2  12  21 3256.35 775.585   3
   2 -12  22 5607.97 788.628   3
   2  12  22 6131.38 833.378   3
   2 -12  23-143.036 820.430   3
   2  12  23 362.754 664.849   3
   2 -12  24 2973.99 844.840   3
   2  12  24 2593.24 811.698   3
   2  12  25 643.609 738.893   3
  -2 -13  25 710.042 737.603   3
  -2  13  25-938.341 753.293   0
  -2 -13  24 3905.81 745.664   3
  -2 -13  23 152.394 689.547   3
  -2 -13  22 290.061 741.715   3
  -2 -13  21 2300.92 675.413   3
  -2 -13  20 6524.20 786.507   3
  -2 -13  19 483.565 622.511   3
  -2 -13  18 3311.02 712.057   3
  -2 -13  17 331.143 584.195   3
  -2 -13  16 8755.74 744.071   3
  -2 -13  15-226.618 627.496   3
  -2 -13  14 2936.04 670.546   3
  -2 -13  13 5153.99 645.460   3
  -2 -13  12 2885.55 565.190   3
  -2 -13  11 12056.8 727.309   3
  -2 -13  10 57226.5 1124.89   3
  -2 -13   9 4502.38 589.394   3
  -2 -13   8 12128.4 679.589   3
  -2 -13   7 3453.35 551.973   3
  -2 -13   6 138668. 1501.30   3
  -2 -13   5 400.587 513.435   3
  -2 -13   4 48886.4 950.581   3
   2 -13  -4 47449.6 655.874   3
   2 -13  -3 10282.7 380.709   3
  -2 -13   3 9988.56 572.003   3
  -2 -13   2 128160. 1398.28   3
   2 -13  -2 127645. 1343.58   2
   2 -13  -2 123102. 1027.96   3
   2 -13  -1 3289.96 451.547   2
   2 -13  -1 3116.64 305.861   3
   2 -13   0 13526.8 559.939   2
   2 -13   0 13580.3 439.977   3
   2 -13   1 13097.1 578.722   2
   2 -13   1 12547.5 451.251   3
   2 -13   2 673.635 413.384   2
   2  13   2 396.080 124.423   2
   2 -13   2 546.930 329.144   3
   2 -13   3 3402.94 369.670   3
   2 -13   3 3026.58 424.726   2
   2  13   3 3297.25 201.954   2
   2 -13   4 103324. 1215.83   2
   2 -13   4 103143. 1147.65   3
   2 -13   5 378.193 392.551   3
   2 -13   6 33272.5 796.131   3
   2 -13   7 17125.0 663.355   3
   2 -13   8 46415.4 960.052   3
   2 -13   9 3885.91 558.148   3
   2 -13  10 17136.6 769.129   3
   2 -13  11 76.9208 536.085   3
   2 -13  12 19919.9 840.075   3
   2 -13  13 2302.52 612.429   3
   2 -13  14 62150.6 1330.05   3
   2 -13  15 1134.09 650.804   3
   2 -13  16 6731.00 795.913   3
   2 -13  17 676.455 669.324   3
   2 -13  18 10991.3 807.872   3
   2 -13  19 284.670 660.405   3
   2 -13  20 1280.95 783.524   3
   2 -13  21 141.147 716.881   3
   2 -13  22 4609.53 797.797   3
   2 -13  23 123.630 826.502   3
  -2 -14  24 606.106 670.548   3
  -2 -14  23 1103.72 745.215   3
  -2 -14  22 4872.16 816.194   3
  -2 -14  21 2667.63 689.981   3
  -2 -14  20 336.939 696.488   3
  -2 -14  19 499.871 592.805   3
  -2 -14  18 486.343 672.175   3
  -2 -14  17 7639.04 725.268   3
  -2 -14  16 11705.8 796.573   3
  -2 -14  15 1797.78 666.270   3
  -2 -14  14 53398.6 1260.83   3
  -2 -14  13 31074.1 1014.28   3
  -2 -14  12 2311.14 571.874   3
  -2 -14  11 10131.8 707.160   3
  -2 -14  10 18132.8 800.426   3
  -2 -14   9 2526.17 580.855   3
  -2 -14   8 61614.9 1142.47   3
  -2 -14   7 20695.6 754.720   3
  -2 -14   6 5131.09 579.347   3
  -2 -14   5 7272.00 624.972   3
   2 -14  -5 7298.42 380.694   3
  -2 -14   4 107933. 1356.16   3
   2 -14  -4 107184. 1000.90   3
  -2 -14   4 103891. 585.847   2
  -2 -14   3 272.076 45.3013   2
  -2 -14   3 656.534 505.152   3
   2 -14  -3 695.966 299.706   3
   2 -14  -2 37657.6 830.671   2
  -2 -14   2 35726.0 862.719   3
   2 -14  -2 35036.5 618.938   3
   2 -14  -1 7993.80 401.663   3
  -2 -14   1 8540.87 594.213   3
   2 -14  -1 7625.39 501.217   2
   2 -14   0 43657.7 856.588   2
   2 -14   0 43754.4 720.998   3
   2 -14   1 1173.62 417.084   2
   2 -14   1 1416.91 330.736   3
   2  14   2 77123.7 544.485   2
   2 -14   2 76066.1 974.638   3
   2 -14   2 74421.9 1048.16   2
   2  14   3 98.1513 165.127   2
   2 -14   3 200.912 355.909   3
   2 -14   3 40.4954 397.988   2
   2 -14   4 1623.20 474.583   2
   2 -14   4 1097.22 383.645   3
   2 -14   5 38380.5 813.719   3
   2 -14   6 46651.6 919.076   3
   2 -14   7 3711.98 496.041   3
   2 -14   8 39799.5 945.746   3
   2 -14   9 7927.24 601.067   3
   2 -14  10 17062.4 757.906   3
   2 -14  11 49257.6 1145.24   3
   2 -14  12 24564.2 936.059   3
   2 -14  13 8629.14 762.975   3
   2 -14  14 372.503 656.451   3
   2 -14  15 6171.49 765.874   3
   2 -14  16 7633.16 787.424   3
   2 -14  17 6763.72 749.032   3
   2 -14  18 1829.30 628.986   3
   2 -14  19 109.460 707.236   3
   2 -14  20 9276.54 935.499   3
   2 -14  21 2473.56 780.926   3
   2 -14  22 696.531 698.550   3
   2 -14  23 367.043 839.511   3
  -2 -15  24 146.047 667.132   3
  -2 -15  23-71.5741 709.587   3
  -2 -15  22 428.509 731.476   3
  -2 -15  21 7584.34 806.803   3
  -2 -15  20 1802.34 748.132   3
  -2 -15  19 4882.02 725.200   3
  -2 -15  18 636.616 676.866   3
  -2 -15  17 3282.39 657.842   3
  -2 -15  16 7864.56 763.833   3
  -2 -15  15 19895.0 951.807   3
  -2 -15  14 4858.69 748.343   3
  -2 -15  13 3489.19 708.112   3
  -2 -15  12 3782.52 694.050   3
  -2 -15  11 14283.6 763.212   3
  -2 -15  10 10353.3 747.115   3
  -2 -15   9 39011.6 1001.81   3
  -2 -15   8 346.538 578.568   3
  -2 -15   7 550.134 558.901   3
  -2 -15   6 26370.9 839.561   3
   2 -15  -5 50609.5 756.490   3
  -2 -15   5 50258.6 1045.21   3
   2 -15  -4 6913.92 389.397   3
  -2 -15   4 7543.88 643.243   3
  -2 -15   4 6486.25 186.079   2
   2 -15  -3 685.905 312.274   3
  -2 -15   3 893.585 534.075   3
   2 -15  -2 7427.48 535.996   2
   2 -15  -2 6736.70 395.803   3
  -2 -15   2 6952.87 566.966   3
   2 -15  -1 1498.22 436.167   2
  -2 -15   1 1321.92 483.435   3
   2 -15  -1 1052.79 313.857   3
   2 -15   0 5125.50 387.684   3
   2 -15   0 6187.40 512.322   2
   2 -15   1 13678.6 598.920   2
   2 -15   1 13766.9 505.161   3
   2 -15   2 296.102 424.834   2
   2 -15   2 192.808 351.228   3
   2  15   2 12.0012 131.704   2
   2 -15   3 71553.1 1014.64   3
   2  15   3 72648.0 628.888   2
   2 -15   3 69318.2 1060.84   2
   2  15   4 28682.7 470.243   2
   2 -15   4 28279.8 725.167   3
   2 -15   4 27378.7 767.163   2
   2 -15   5 89.3088 467.914   2
   2 -15   5 41.0371 392.463   3
   2 -15   6 15887.6 646.072   3
   2 -15   7 5284.63 565.162   3
   2 -15   8 19875.4 748.295   3
   2 -15   9 55302.0 1133.90   3
   2 -15  10 6760.04 616.668   3
   2 -15  11 763.756 566.187   3
   2 -15  12 158.220 610.032   3
   2 -15  13 39768.8 1146.68   3
   2 -15  14 16372.3 893.176   3
   2 -15  15 2030.20 673.459   3
   2 -15  16 793.111 643.183   3
   2 -15  17 3405.24 664.917   3
   2 -15  18 4224.61 695.387   3
   2 -15  19 6492.53 844.829   3
   2 -15  20 614.871 796.753   3
   2 -15  21 413.832 748.852   3
   2 -15  22 2208.95 722.332   3
   2 -15  23 1556.96 837.044   3
  -2 -16  23 1749.32 710.285   3
  -2 -16  22 605.270 760.385   3
  -2 -16  21 681.321 693.839   3
  -2 -16  20 736.561 695.971   3
  -2 -16  19 7270.64 841.585   3
  -2 -16  18 2139.15 699.253   3
  -2 -16  17 13051.9 837.151   3
  -2 -16  16 2302.90 710.240   3
  -2 -16  15 282.860 648.331   3
  -2 -16  14 13164.6 832.856   3
  -2 -16  13 81430.0 1499.41   3
  -2 -16  12 952.011 649.189   3
  -2 -16  11 39583.7 1126.35   3
  -2 -16  10 4827.56 674.903   3
  -2 -16   9 6779.42 668.879   3
  -2 -16   8 22.0633 589.760   3
  -2 -16   7 58491.0 1194.79   3
   2 -16  -6 7527.14 417.622   3
  -2 -16   6 6867.63 628.472   3
   2 -16  -5 2648.26 350.323   3
  -2 -16   5 2186.12 194.297   2
  -2 -16   5 2963.62 556.651   3
   2 -16  -4 6072.54 385.845   3
  -2 -16   4 5853.60 589.324   3
  -2 -16   4 5772.97 179.543   2
   2 -16  -3 50226.2 786.587   3
  -2 -16   3 51412.9 1053.44   3
   2 -16  -2 772.017 326.136   3
  -2 -16   2 910.721 510.988   3
  -2 -16   1 5310.75 558.744   3
   2 -16  -1 5015.78 506.400   2
   2 -16  -1 5098.00 406.671   3
   2 -16   0 30687.9 771.689   2
   2 -16   0 29790.0 680.595   3
   2 -16   1 24225.7 731.611   2
   2 -16   1 24041.1 638.067   3
   2 -16   2 15280.8 577.922   3
   2 -16   2 14686.9 651.971   2
   2 -16   3 2867.35 476.614   2
   2  16   3 2421.48 205.042   2
   2 -16   3 3232.80 442.482   3
   2  16   4 2397.62 235.153   2
   2 -16   4 2557.37 503.346   2
   2 -16   4 2945.55 450.307   3
   2 -16   5 22764.1 706.442   3
   2 -16   5 21537.6 738.436   2
   2 -16   6 12933.0 643.194   3
   2 -16   7 71761.9 1203.21   3
   2 -16   8 1015.90 490.133   3
   2 -16   9 2994.21 598.985   3
   2 -16  10 2281.02 560.741   3
   2 -16  11 80353.3 1418.88   3
   2 -16  12 6298.31 705.580   3
   2 -16  13 8303.65 764.730   3
   2 -16  14-54.1585 630.252   3
   2 -16  15 15776.1 909.249   3
   2 -16  16 155.135 635.707   3
   2 -16  17 6765.99 752.632   3
   2 -16  18 852.324 627.718   3
   2 -16  19 1128.29 730.270   3
   2 -16  20 1407.00 823.192   3
   2 -16  21 3429.08 847.274   3
   2 -16  22-56.1170 687.212   3
  -2 -17  23 327.396 654.823   3
  -2 -17  22-113.592 738.555   3
  -2 -17  21 785.314 758.722   3
  -2 -17  20 1885.58 683.389   3
  -2 -17  19 2895.38 787.831   3
  -2 -17  18 5709.68 740.107   3
  -2 -17  17 4468.72 766.879   3
  -2 -17  16 993.754 666.887   3
  -2 -17  15 10431.0 787.752   3
  -2 -17  14 1081.16 622.007   3
  -2 -17  13 1200.41 656.617   3
  -2 -17  12 633.868 644.247   3
  -2 -17  11 79302.1 1448.78   3
  -2 -17  10 15645.0 828.124   3
  -2 -17   9 22761.9 927.856   3
  -2 -17   8 11547.2 727.982   3
  -2 -17   7 13222.7 797.134   3
   2 -17  -6 14688.7 530.036   3
  -2 -17   6 14740.7 348.165   2
  -2 -17   6 15682.2 758.151   3
   2 -17  -5 13661.6 517.896   3
  -2 -17   5 13838.4 297.520   2
  -2 -17   5 15332.3 782.866   3
  -2 -17   4 5419.29 183.706   2
  -2 -17   4 5368.17 645.672   3
   2 -17  -4 5856.53 441.759   3
   2 -17  -3 2516.14 381.262   3
  -2 -17   3 3013.17 589.730   3
  -2 -17   2 9392.41 651.373   3
   2 -17  -2 8737.57 460.502   3
   2 -17  -1 34835.7 859.750   2
  -2 -17   1 32641.0 911.845   3
   2 -17  -1 35148.8 734.692   3
  -2 -17   0 9893.89 697.075   3
   2 -17   0 9691.38 507.512   3
   2 -17   0 10021.6 618.776   2
   2 -17   1 347.568 457.341   2
   2 -17   1 395.036 369.679   3
   2 -17   2 1723.85 501.529   2
   2 -17   2 1608.18 427.122   3
   2 -17   3 16280.2 658.442   2
   2  17   3 16276.6 347.950   2
   2 -17   3 16844.0 626.868   3
   2  17   4 2487.38 242.420   2
   2 -17   4 2310.09 522.847   2
   2 -17   4 2640.40 467.895   3
   2 -17   5 37451.3 888.901   3
   2 -17   5 40315.9 924.556   2
   2 -17   6 1970.86 488.889   3
   2 -17   6 1945.25 489.357   2
   2 -17   7 32712.0 915.781   3
   2 -17   8 665.903 500.294   3
   2 -17   9 23686.0 874.113   3
   2 -17  10 4225.93 606.210   3
   2 -17  11 5004.69 649.208   3
   2 -17  12 965.440 628.567   3
   2 -17  13 11722.3 825.416   3
   2 -17  14 519.658 642.489   3
   2 -17  15 15298.3 912.362   3
   2 -17  16 1561.63 706.151   3
   2 -17  17 6247.40 788.267   3
   2 -17  18 1275.14 643.663   3
   2 -17  19 4242.54 750.130   3
   2 -17  20 441.780 773.531   3
   2 -17  21 1062.06 841.726   3
   2 -17  22 2413.87 839.241   3
  -2 -18  22 4304.28 775.278   3
  -2 -18  21 855.015 769.756   3
  -2 -18  20 1640.40 764.691   3
  -2 -18  19 149.106 686.397   3
  -2 -18  18 1298.44 724.045   3
  -2 -18  17 1279.72 684.857   3
  -2 -18  16 955.052 608.413   3
  -2 -18  15 445.362 675.298   3
  -2 -18  14 1327.92 694.619   3
  -2 -18  13 21960.7 976.997   3
  -2 -18  12 15247.7 857.899   3
  -2 -18  11 427.199 631.967   3
  -2 -18  10 496.152 669.772   3
  -2 -18   9 1521.81 688.832   3
  -2 -18   8 14997.5 777.224   3
  -2 -18   7 18546.9 850.983   3
   2 -18  -7 18162.4 581.847   3
  -2 -18   6 464.176 603.278   3
  -2 -18   6 582.221 203.601   2
   2 -18  -6 717.969 363.236   3
  -2 -18   5 18883.2 333.901   2
   2 -18  -5 19096.3 599.011   3
  -2 -18   5 19632.3 834.288   3
  -2 -18   4 54426.6 1156.26   3
  -2 -18   4 51801.7 454.321   2
   2 -18  -4 55488.6 903.513   3
   2 -18  -3 10113.6 507.236   3
  -2 -18   3 11798.3 744.930   3
   2 -18  -2 60140.9 941.939   3
  -2 -18   2 62276.4 1195.47   3
   2 -18  -1 990.630 391.754   3
   2 -18  -1 2454.99 566.309   2
  -2 -18   1 1607.88 609.176   3
   2 -18   0 25715.0 781.493   2
  -2 -18   0 26597.7 894.809   3
   2 -18   0 26184.7 717.586   3
   2 -18   1 9655.06 622.782   2
   2 -18   1 9934.07 538.938   3
   2 -18   2 33202.6 854.190   2
   2 -18   2 34507.5 821.357   3
   2 -18   3 105.411 489.696   2
   2 -18   3 110.830 415.811   3
   2  18   3 103.975 185.246   2
   2 -18   4 11476.1 648.409   2
   2 -18   4 13180.2 646.463   3
   2 -18   5 11973.1 642.719   2
   2 -18   5 12896.4 655.358   3
   2 -18   6 23081.7 795.134   2
   2 -18   6 23782.5 795.594   3
   2 -18   7 6894.51 622.695   3
   2 -18   8 2742.90 582.993   3
   2 -18   9 7359.46 668.694   3
   2 -18  10 21826.2 877.614   3
   2 -18  11 44224.6 1166.62   3
   2 -18  12 1776.87 647.122   3
   2 -18  13 253.164 633.323   3
   2 -18  14 7886.53 799.011   3
   2 -18  15 2171.10 700.290   3
   2 -18  16 11169.5 902.659   3
   2 -18  17 4688.05 806.574   3
   2 -18  18 3649.17 796.323   3
   2 -18  19 1576.82 718.021   3
   2 -18  20 10204.3 891.280   3
   2 -18  21 2194.58 824.492   3
  -2 -19  22 482.457 791.446   3
  -2 -19  21 520.020 657.532   3
  -2 -19  20 2349.46 823.508   3
  -2 -19  19 17.7676 702.992   3
  -2 -19  18 946.087 721.795   3
  -2 -19  17-185.206 654.589   3
  -2 -19  16 2083.50 725.006   3
  -2 -19  15 433.058 571.728   3
  -2 -19  14 9381.12 796.217   3
  -2 -19  13 709.434 690.108   3
  -2 -19  12 7696.31 793.802   3
  -2 -19  11-213.202 656.790   3
  -2 -19  10 10497.2 800.985   3
  -2 -19   9 7691.83 754.644   3
  -2 -19   8 4358.48 668.445   3
  -2 -19   7 3027.27 260.374   2
   2 -19  -7 3394.33 417.406   3
  -2 -19   7 3096.95 621.083   3
   2 -19  -6 54151.8 921.122   3
  -2 -19   6 52682.5 583.642   2
  -2 -19   6 52788.4 1206.33   3
  -2 -19   5 672.016 578.099   3
   2 -19  -5 674.464 363.347   3
   2 -19  -4 1149.18 389.017   3
  -2 -19   4 1878.39 614.505   3
   2 -19  -3 5298.10 463.849   3
  -2 -19   3 6144.65 669.602   3
   2 -19  -2 32137.4 763.933   3
  -2 -19   2 31877.9 955.118   3
   2 -19  -1 33065.0 888.346   2
   2 -19  -1 30450.8 749.483   3
  -2 -19   1 31651.3 980.728   3
   2 -19   0 80407.3 1234.83   2
   2 -19   0 82531.3 1171.61   3
  -2 -19   0 80393.3 1367.19   3
   2 -19   1 321.347 467.830   2
   2 -19   1 164.254 413.629   3
   2 -19   2 340.235 486.819   2
   2 -19   2 434.072 433.601   3
   2 -19   3 127.949 449.316   3
   2 -19   3-187.938 499.171   2
   2 -19   4 67800.1 1160.97   2
   2 -19   4 69132.5 1172.45   3
   2 -19   5 2719.91 519.929   2
   2 -19   5 2568.47 501.740   3
   2 -19   6 4274.92 579.249   2
   2 -19   6 4483.34 587.953   3
   2 -19   7 113.219 488.382   2
   2 -19   7 95.5414 520.729   3
   2 -19   8 15693.7 802.467   3
   2 -19   9 742.824 542.970   3
   2 -19  10 10864.9 755.352   3
   2 -19  11 760.036 622.976   3
   2 -19  12 3981.82 683.832   3
   2 -19  13 45.4513 603.288   3
   2 -19  14 623.095 618.482   3
   2 -19  15 1775.49 655.886   3
   2 -19  16 70.2912 666.975   3
   2 -19  17 1015.07 723.372   3
   2 -19  18 23638.3 1172.30   3
   2 -19  19 355.032 797.018   3
   2 -19  20 2046.95 796.453   3
   2 -19  21 1043.50 682.497   3
  -2 -20  21 210.874 810.921   3
  -2 -20  20 474.166 684.302   3
  -2 -20  19 1183.50 785.439   3
  -2 -20  18 3331.62 769.963   3
  -2 -20  17 217.560 702.338   3
  -2 -20  16 147.138 639.233   3
  -2 -20  15 39.7291 696.433   3
  -2 -20  14 1135.07 649.891   3
  -2 -20  13 4928.07 666.220   3
  -2 -20  12 18030.9 940.945   3
  -2 -20  11 8579.45 801.567   3
  -2 -20  10 8824.35 808.075   3
  -2 -20   9 1949.77 673.934   3
   2 -20  -8 40037.7 861.838   3
  -2 -20   8 38829.7 1138.98   3
   2 -20  -7 38241.5 829.739   3
  -2 -20   7 36603.2 1073.02   3
  -2 -20   6 4676.74 634.540   3
   2 -20  -6 5425.44 475.520   3
  -2 -20   5 4474.67 681.934   3
   2 -20  -5 4242.28 451.337   3
   2 -20  -4 53056.4 943.445   3
  -2 -20   4 53573.1 1217.15   3
  -2 -20   3 5250.82 631.821   3
   2 -20  -3 4816.66 485.248   3
  -2 -20   2 49549.2 1161.33   3
   2 -20  -2 46262.0 912.899   3
  -2 -20   1 958.506 635.523   3
   2 -20  -1 221.921 429.055   3
   2 -20   0 11872.6 670.815   2
   2 -20   0 10458.7 579.717   3
  -2 -20   0 11823.8 774.687   3
   2 -20   1 448.226 438.116   3
  -2 -20  -1 399.719 565.727   3
   2 -20   1-130.401 509.771   2
   2 -20   2 32862.8 885.937   2
   2 -20   2 34230.5 868.908   3
   2 -20   3 1844.58 487.879   3
   2 -20   3 1605.38 524.446   2
   2 -20   4 1676.19 510.553   3
   2 -20   4 1535.67 533.410   2
   2 -20   5 5918.42 569.197   2
   2 -20   5 6330.43 601.107   3
   2 -20   6 43760.2 1043.77   3
   2 -20   6 45585.8 1039.65   2
   2 -20   7 2469.84 598.652   3
   2 -20   7 3048.25 575.249   2
   2 -20   8 14269.1 732.933   2
   2 -20   8 13328.9 770.082   3
   2 -20   9 3677.21 662.218   3
   2 -20  10 11512.5 782.553   3
   2 -20  11 12805.6 776.407   3
   2 -20  12 15121.5 837.839   3
   2 -20  13 2840.11 636.604   3
   2 -20  14 434.350 625.720   3
   2 -20  15 133.692 634.418   3
   2 -20  16 17617.8 979.392   3
   2 -20  17 276.801 641.415   3
   2 -20  18 245.106 663.927   3
   2 -20  19 769.632 756.670   3
   2 -20  20 5419.87 922.798   3
  -2 -21  21 843.415 695.248   3
  -2 -21  20 2963.19 847.525   3
  -2 -21  19 2606.72 795.751   3
  -2 -21  18-56.3843 707.671   3
  -2 -21  17 569.939 741.688   3
  -2 -21  16 369.473 687.050   3
  -2 -21  15 6126.91 792.193   3
  -2 -21  14 72.2135 700.589   3
  -2 -21  13 1577.99 647.769   3
  -2 -21  12 1333.01 623.580   3
  -2 -21  11 10924.4 864.362   3
  -2 -21  10 31266.4 1119.89   3
  -2 -21   9 14951.0 903.540   3
  -2 -21   8-4.27150 669.437   3
   2 -21  -8 462.597 390.553   3
  -2 -21   7 1725.77 691.432   3
   2 -21  -7 2033.81 420.789   3
   2 -21  -6 16786.6 637.598   3
  -2 -21   6 16313.9 875.135   3
  -2 -21   5 9003.82 739.383   3
   2 -21  -5 8989.53 538.627   3
  -2 -21   4 927.798 577.271   3
   2 -21  -4 431.751 393.738   3
   2 -21  -3 339.924 413.515   3
  -2 -21   3 596.742 545.173   3
  -2 -21   2 8700.60 733.688   3
   2 -21  -2 8193.51 541.544   3
   2 -21  -1 6215.24 527.627   3
  -2 -21   1 7303.93 724.672   3
   2 -21   0 11783.7 656.818   2
  -2 -21   0 12411.9 806.670   3
   2 -21   0 12698.7 623.245   3
   2 -21   1 671.004 475.724   2
  -2 -21  -1 1413.48 639.547   3
   2 -21   1 670.035 445.986   3
   2 -21   2 1233.53 467.100   3
   2 -21   2 904.434 476.084   2
   2 -21   3 1766.17 482.982   3
   2 -21   3 1007.29 500.005   2
   2 -21   4 2074.67 526.411   2
   2 -21   4 2387.49 541.578   3
   2 -21   5 4309.50 550.226   2
   2 -21   5 4411.13 560.390   3
   2 -21   6 1791.32 554.506   3
   2 -21   6 2191.58 530.711   2
   2 -21   7 28176.4 936.068   3
   2 -21   7 28818.0 904.005   2
   2 -21   8 10238.7 684.999   2
   2 -21   8 9355.65 746.883   3
   2 -21   9 27904.3 895.965   2
   2 -21   9 28294.4 975.308   3
   2 -21  10 7199.16 703.124   3
   2 -21  11 526.413 625.271   3
   2 -21  12 435.700 643.809   3
   2 -21  13 12056.1 873.612   3
   2 -21  14 10671.3 872.001   3
   2 -21  15 1040.95 726.659   3
   2 -21  16 1094.19 766.551   3
   2 -21  17 2837.46 840.298   3
   2 -21  18 1887.16 822.570   3
   2 -21  19 5201.84 872.294   3
   2 -21  20 2183.05 729.571   3
  -2 -22  20 1523.00 786.049   3
  -2 -22  19 1672.81 736.354   3
  -2 -22  18 464.920 796.406   3
  -2 -22  17 10172.0 877.586   3
  -2 -22  16 1095.42 768.831   3
  -2 -22  15 65.5452 615.775   3
  -2 -22  14 1118.13 720.094   3
  -2 -22  13 20285.1 1024.19   3
  -2 -22  12 1101.28 626.529   3
  -2 -22  11 7495.72 811.503   3
  -2 -22  10 1223.93 730.193   3
   2 -22  -9 15057.4 635.519   3
  -2 -22   9 15503.1 929.896   3
  -2 -22   8 579.027 641.663   3
   2 -22  -8 803.346 413.249   3
  -2 -22   7 19150.6 935.612   3
   2 -22  -7 18281.1 669.280   3
   2 -22  -6 4470.58 477.382   3
  -2 -22   6 4395.70 704.430   3
   2 -22  -5 3056.99 459.978   3
  -2 -22   5 3564.33 656.475   3
   2 -22  -4 1572.46 429.686   3
  -2 -22   4 1455.92 628.610   3
  -2 -22   3 24558.2 962.939   3
   2 -22  -3 23573.3 747.781   3
  -2 -22   2 1938.96 640.292   3
   2 -22  -2 1886.45 466.905   3
  -2 -22   1 2310.36 649.427   3
   2 -22  -1 2863.37 484.431   3
  -2 -22   0-27.7455 594.334   3
   2 -22   0 154.886 499.735   2
   2 -22   0 190.569 453.446   3
  -2 -22  -1 22189.2 903.656   3
   2 -22   1 20799.5 753.451   3
   2 -22   1 21941.5 786.025   2
  -2 -22  -2 10376.9 744.380   3
   2 -22   2 9946.77 624.877   2
   2 -22   2 9852.13 623.186   3
   2 -22   3 2675.76 509.229   2
   2 -22   3 3521.54 547.785   3
   2 -22   4 575.970 503.079   2
   2 -22   4 781.549 506.645   3
   2 -22   5 15736.3 722.449   2
   2 -22   5 16069.3 760.374   3
   2 -22   6 547.563 555.761   3
   2 -22   6 339.175 481.129   2
   2 -22   7 37674.2 1058.96   3
   2 -22   7 37021.4 988.004   2
   2 -22   8 774.596 580.370   3
   2 -22   8 814.990 501.242   2
   2 -22   9 7952.53 670.173   2
   2 -22   9 6997.71 738.700   3
   2 -22  10 5922.19 688.316   3
   2 -22  10 5874.08 605.382   2
   2 -22  11 13785.2 821.104   3
   2 -22  12 3568.89 658.932   3
   2 -22  13 4068.79 702.173   3
   2 -22  14 385.517 642.118   3
   2 -22  15 8191.46 816.332   3
   2 -22  16 356.799 648.753   3
   2 -22  17 8477.76 861.479   3
   2 -22  18 3787.54 774.384   3
   2 -22  19 102.101 789.094   3
  -2 -23  19 2186.51 864.981   3
  -2 -23  18 1666.78 758.449   3
  -2 -23  17 2997.49 811.203   3
  -2 -23  16 801.980 761.676   3
  -2 -23  15 9222.58 865.173   3
  -2 -23  14 571.649 688.095   3
  -2 -23  13 564.580 709.316   3
  -2 -23  12 151.791 607.130   3
  -2 -23  11 18261.5 990.826   3
  -2 -23  10 1247.00 715.431   3
   2 -23  -9 18487.5 699.801   3
  -2 -23   9 19046.1 952.245   3
  -2 -23   8 249.053 578.026   3
   2 -23  -8 142.300 419.198   3
  -2 -23   7 14532.7 876.193   3
   2 -23  -7 13430.8 642.983   3
  -2 -23   6 2023.30 691.037   3
   2 -23  -6 1583.73 454.460   3
   2 -23  -5 19591.2 719.463   3
  -2 -23   5 16778.2 911.159   3
  -2 -23   4 4912.48 750.940   3
   2 -23  -4 3881.95 500.559   3
   2 -23  -3 5867.18 537.612   3
  -2 -23   3 6177.14 757.817   3
  -2 -23   2 7191.07 749.183   3
   2 -23  -2 6828.06 561.954   3
  -2 -23   1 842.543 604.921   3
   2 -23  -1 802.802 444.757   3
  -2 -23   0 978.796 576.715   3
   2 -23   0 944.768 471.491   3
   2 -23   1 3200.64 567.426   2
  -2 -23  -1 4380.70 682.630   3
   2 -23   1 3192.34 532.803   3
   2 -23   2 1613.67 528.750   2
  -2 -23  -2 2330.14 689.451   3
   2 -23   2 1610.50 525.738   3
   2 -23   3 30484.5 896.825   2
   2 -23   3 32701.6 942.346   3
   2 -23   4 307.141 522.145   2
   2 -23   4 768.906 517.630   3
   2 -23   5 2439.53 524.485   2
   2 -23   5 2946.28 554.560   3
   2 -23   6 63.9702 531.467   3
   2 -23   6-125.038 489.212   2
   2 -23   7 1298.10 510.013   2
   2 -23   7 1423.20 596.691   3
   2 -23   8 27.0616 534.895   3
   2 -23   8 188.890 488.650   2
   2 -23   9 18665.9 829.035   2
   2 -23   9 20597.8 927.614   3
   2 -23  10 309.085 505.473   2
   2 -23  10 545.043 626.060   3
   2 -23  11 535.102 647.845   3
   2 -23  11 421.086 512.607   2
   2 -23  12 5476.83 769.796   3
   2 -23  13 15623.3 960.403   3
   2 -23  14 2204.46 720.506   3
   2 -23  15 4245.21 808.060   3
   2 -23  16 2768.44 833.874   3
   2 -23  17 1491.20 842.046   3
   2 -23  18 608.048 807.622   3
   2 -23  19 7612.96 945.526   3
  -2 -24  18 196.436 685.394   3
  -2 -24  17 3940.08 884.459   3
  -2 -24  16 5158.64 823.192   3
  -2 -24  15 638.085 757.029   3
  -2 -24  14 414.801 689.146   3
  -2 -24  13 2221.41 745.344   3
  -2 -24  12 390.741 615.836   3
  -2 -24  11 7146.18 855.322   3
  -2 -24  10 3877.48 758.600   3
  -2 -24   9 13107.7 860.899   3
  -2 -24   8 5885.14 802.367   3
   2 -24  -8 5561.88 539.694   3
   2 -24  -7 1497.95 453.746   3
  -2 -24   7 1819.48 708.732   3
   2 -24  -6 2036.33 458.205   3
  -2 -24   6 2117.20 642.116   3
  -2 -24   5 2380.29 626.937   3
   2 -24  -5 2483.36 468.472   3
   2 -24  -4 16015.8 702.286   3
  -2 -24   4 16779.4 915.633   3
  -2 -24   3 24261.8 1034.21   3
   2 -24  -3 21872.9 777.404   3
  -2 -24   2 8343.63 792.835   3
   2 -24  -2 8185.12 595.002   3
  -2 -24   1-103.972 579.034   3
   2 -24  -1 215.282 455.672   3
   2 -24   0 2789.17 516.587   3
  -2 -24   0 2809.72 684.756   3
  -2 -24  -1 17651.3 941.860   3
   2 -24   1 16292.0 749.957   2
   2 -24   1 16422.6 746.517   3
   2 -24   2 20318.0 802.005   2
  -2 -24  -2 19384.3 912.526   3
   2 -24   2 19831.9 820.845   3
   2 -24   3 4269.65 592.479   3
   2 -24   3 4358.44 556.397   2
  -2 -24  -3 5557.36 766.723   3
   2 -24   4 1266.82 543.871   3
   2 -24   4 1141.86 533.947   2
   2 -24   5 1244.23 497.044   2
   2 -24   5 1510.48 540.129   3
   2 -24   6 753.959 548.342   3
   2 -24   6 364.281 490.067   2
   2 -24   7 12885.2 799.504   3
   2 -24   7 13883.5 719.852   2
   2 -24   8 2867.01 576.087   2
   2 -24   8 3368.42 609.638   3
   2 -24   9 376.234 552.432   3
   2 -24   9 342.940 517.769   2
   2 -24  10 4354.56 638.046   2
   2 -24  10 4882.42 694.791   3
   2 -24  11 9732.58 825.744   3
   2 -24  11 8872.54 705.456   2
   2 -24  12 608.177 575.458   2
   2 -24  12 1118.31 698.061   3
   2 -24  13 5685.50 806.194   3
   2 -24  14 4682.06 835.397   3
   2 -24  15 5486.33 869.288   3
   2 -24  16 3090.39 817.093   3
   2 -24  17 363.918 705.304   3
   2 -24  18 2320.30 745.839   3
  -2 -25  17 208.368 809.706   3
  -2 -25  16 6130.62 815.964   3
  -2 -25  15 223.788 772.007   3
  -2 -25  14 2060.44 748.328   3
  -2 -25  13 449.281 730.972   3
  -2 -25  12-9.41786 674.098   3
  -2 -25  11 1192.53 744.001   3
  -2 -25  10 8438.27 786.605   3
  -2 -25   9 1303.16 738.419   3
  -2 -25   8 1317.50 671.686   3
   2 -25  -7 10583.1 632.495   3
  -2 -25   7 11590.9 832.216   3
  -2 -25   6 16394.3 961.867   3
   2 -25  -6 16685.5 729.287   3
  -2 -25   5 1218.39 675.838   3
   2 -25  -5 797.517 464.090   3
  -2 -25   4 18178.4 920.008   3
   2 -25  -4 18053.0 747.215   3
  -2 -25   3 2026.03 719.896   3
   2 -25  -3 1818.68 498.932   3
   2 -25  -2 11531.6 665.256   3
  -2 -25   2 12205.8 855.704   3
  -2 -25   1 4002.09 664.054   3
   2 -25  -1 3940.21 551.414   3
  -2 -25   0 19239.4 983.579   3
   2 -25   0 17632.3 765.568   3
   2 -25   1 632.299 529.458   2
  -2 -25  -1 417.004 602.964   3
   2 -25   1 213.478 494.131   3
  -2 -25  -2 2222.28 701.056   3
   2 -25   2 1716.49 522.642   2
   2 -25   2 1507.67 530.306   3
   2 -25   3 6475.58 615.871   2
  -2 -25  -3 6676.50 718.622   3
   2 -25   3 7125.97 652.129   3
  -2 -25  -4 23292.0 1038.35   3
   2 -25   4 23053.1 851.665   2
   2 -25   4 24024.0 921.848   3
   2 -25   5 3697.39 560.160   2
   2 -25   5 3409.97 594.380   3
   2 -25   6 3199.10 618.055   3
   2 -25   6 3421.27 546.530   2
   2 -25   7 165.326 582.445   3
   2 -25   7 8.97974 509.481   2
   2 -25   8 6127.89 647.111   2
   2 -25   8 5819.33 688.605   3
   2 -25   9 1206.39 573.832   3
   2 -25   9 1522.90 527.507   2
   2 -25  10 2253.81 617.405   3
   2 -25  10 2789.95 593.221   2
   2 -25  11 520.691 572.063   2
   2 -25  11 211.383 601.698   3
   2 -25  12 911.118 664.096   3
   2 -25  12 1451.57 610.429   2
   2 -25  13 519.061 671.535   3
   2 -25  13 454.078 589.314   2
   2 -25  14 8871.11 870.410   3
   2 -25  14 9365.53 764.918   2
   2 -25  15 650.832 658.285   3
   2 -25  16 427.589 697.832   3
   2 -25  17 1320.06 718.544   3
  -2 -26  17 983.587 824.679   3
  -2 -26  16 1681.61 698.969   3
  -2 -26  15 2755.38 819.909   3
  -2 -26  14 5358.25 876.522   3
  -2 -26  13-219.827 679.084   3
  -2 -26  12 3697.68 825.323   3
  -2 -26  11 1173.87 679.757   3
  -2 -26  10 2341.67 790.403   3
  -2 -26   9 276.943 665.790   3
  -2 -26   8 12190.8 908.452   3
  -2 -26   7 1537.33 724.180   3
   2 -26  -6 312.042 461.625   3
  -2 -26   6 394.196 601.421   3
   2 -26  -5 3792.57 545.831   3
  -2 -26   5 3167.58 761.138   3
  -2 -26   4 24807.1 1041.61   3
   2 -26  -4 23492.2 840.539   3
  -2 -26   3 3870.50 755.511   3
   2 -26  -3 3330.89 549.245   3
   2 -26  -2 6920.06 608.067   3
  -2 -26   2 7402.80 805.585   3
  -2 -26   1-317.206 622.831   3
   2 -26  -1-206.677 484.902   3
  -2 -26   0 4027.51 759.216   3
   2 -26   0 4379.28 587.682   3
   2 -26   1 615.613 512.149   3
  -2 -26  -1 472.371 639.313   3
   2 -26   2 19754.7 807.456   2
  -2 -26  -2 19169.9 977.289   3
   2 -26   2 18880.2 833.324   3
  -2 -26  -3 1191.56 691.682   3
   2 -26   3 1479.01 521.066   2
   2 -26   3 814.124 552.526   3
   2 -26   4 612.355 517.456   2
  -2 -26  -4 1145.92 645.523   3
   2 -26   4 424.704 544.143   3
   2 -26   5 124.748 488.748   2
   2 -26   5 89.0138 543.538   3
   2 -26   6 6199.38 617.035   2
   2 -26   6 5477.50 693.667   3
   2 -26   7 778.173 612.131   3
   2 -26   7 27.6135 534.581   2
   2 -26   8 5754.73 620.878   2
   2 -26   8 6288.76 714.637   3
   2 -26   9 4313.89 663.249   3
   2 -26   9 2989.82 576.610   2
   2 -26  10 3594.78 667.878   3
   2 -26  10 3711.55 583.339   2
   2 -26  11 510.402 616.546   3
   2 -26  11 362.275 557.142   2
   2 -26  12 10045.3 738.763   2
   2 -26  12 10849.3 852.514   3
   2 -26  13 2043.79 718.362   3
   2 -26  13 1654.94 611.801   2
   2 -26  14 1048.10 705.021   3
   2 -26  14 1512.74 677.342   2
   2 -26  15 1162.00 712.252   3
   2 -26  15 1091.02 631.108   2
   2 -26  16 3553.15 821.739   3
   2 -26  17 443.318 783.113   3
  -2 -27  15 3058.86 808.180   3
  -2 -27  14 3614.97 882.288   3
  -2 -27  13 1548.76 699.432   3
  -2 -27  12 2160.90 828.610   3
  -2 -27  11 498.437 701.752   3
  -2 -27  10 2650.28 759.672   3
  -2 -27   9 6258.42 856.080   3
  -2 -27   8 2431.45 750.581   3
  -2 -27   7-41.8328 699.309   3
  -2 -27   6 10390.2 908.945   3
   2 -27  -5 9732.06 654.999   3
  -2 -27   5 9456.77 871.979   3
  -2 -27   4 1139.91 712.999   3
   2 -27  -4 737.289 499.243   3
  -2 -27   3 969.424 658.685   3
   2 -27  -3 1271.40 508.188   3
  -2 -27   2 1156.15 693.055   3
   2 -27  -2 1381.19 504.789   3
  -2 -27   1 780.101 671.077   3
   2 -27  -1 1021.56 514.627   3
   2 -27   0 6274.56 632.328   3
  -2 -27   0 6359.13 742.259   3
   2 -27   1 410.751 536.405   3
  -2 -27  -1-6.49488 685.882   3
   2 -27   2 1491.28 543.902   2
  -2 -27  -2 1040.20 635.462   3
   2 -27   2 956.824 542.849   3
   2 -27   3 516.147 526.943   2
  -2 -27  -3 1535.71 640.110   3
   2 -27   3 752.671 531.147   3
   2 -27   4 14033.1 742.913   2
  -2 -27  -4 15377.9 938.963   3
   2 -27   4 13858.2 807.902   3
   2 -27   5 2278.82 643.484   3
   2 -27   5 1841.42 542.965   2
  -2 -27  -5 2198.87 740.555   3
   2 -27   6 386.849 534.877   2
   2 -27   6 663.505 622.846   3
   2 -27   7 5568.93 646.882   2
   2 -27   7 5646.26 700.954   3
   2 -27   8 3175.50 648.703   3
   2 -27   8 2412.79 564.105   2
   2 -27   9 3431.71 674.077   3
   2 -27   9 3707.43 626.673   2
   2 -27  10 6063.65 653.916   2
   2 -27  10 5645.90 739.545   3
   2 -27  11 337.271 625.473   3
   2 -27  11 296.755 546.861   2
   2 -27  12 2801.52 703.977   3
   2 -27  12 2453.19 609.312   2
   2 -27  13 12877.7 948.156   3
   2 -27  13 13209.2 858.613   2
   2 -27  14 7036.88 860.545   3
   2 -27  15 1177.86 765.102   3
   2 -27  16-144.685 780.501   3
  -2 -28  14 1049.79 836.929   3
  -2 -28  13 11316.2 996.429   3
  -2 -28  12 3049.94 757.114   3
  -2 -28  11 686.523 805.658   3
  -2 -28  10 892.865 702.433   3
  -2 -28   9 599.240 746.453   3
  -2 -28   8 2221.12 773.498   3
  -2 -28   7 18871.5 1031.31   3
  -2 -28   6 4251.32 836.343   3
  -2 -28   5 1230.63 643.413   3
  -2 -28   4 2985.93 758.957   3
   2 -28  -4 3006.74 543.600   3
  -2 -28   3 2632.17 686.523   3
   2 -28  -3 2143.23 535.074   3
  -2 -28   2 440.694 670.877   3
   2 -28  -2-351.168 504.242   3
  -2 -28   1 336.349 698.768   3
   2 -28  -1 232.247 528.887   3
   2 -28   0 1683.72 534.297   3
  -2 -28   0 2279.00 658.807   3
   2 -28   1 1772.95 566.494   3
  -2 -28  -1 2143.23 705.779   3
   2 -28   2 249.157 529.042   3
  -2 -28  -2 508.712 709.587   3
  -2 -28  -3 233.982 689.719   3
   2 -28   3 328.048 534.296   2
   2 -28   3 226.252 576.903   3
   2 -28   4 451.275 516.259   2
  -2 -28  -4 433.372 669.376   3
   2 -28   4 493.624 584.641   3
   2 -28   5 13020.7 744.760   2
  -2 -28  -5 13834.5 923.981   3
   2 -28   5 13464.4 841.327   3
   2 -28   6 3746.04 659.856   3
   2 -28   6 3844.26 603.358   2
  -2 -28  -6 4003.54 776.258   3
   2 -28   7 3333.70 680.709   3
   2 -28   7 1976.93 552.682   2
   2 -28   8 1619.63 546.419   2
   2 -28   8 1167.04 623.955   3
   2 -28   9 3454.01 680.027   3
   2 -28   9 2918.63 600.711   2
   2 -28  10 1373.24 650.476   3
   2 -28  11 17706.2 1007.29   3
   2 -28  12 9851.40 894.229   3
   2 -28  13 1773.14 717.110   3
   2 -28  14 117.042 714.850   3
   2 -28  15 2270.43 779.135   3
  -2 -29  13 721.416 822.371   3
  -2 -29  12 944.113 758.102   3
  -2 -29  11 4505.30 782.739   3
  -2 -29  10 220.483 788.421   3
  -2 -29   9 1629.21 743.827   3
  -2 -29   8 4218.71 801.215   3
  -2 -29   7 7164.44 934.854   3
  -2 -29   6 103.799 669.097   3
  -2 -29   5 8040.78 862.900   3
  -2 -29   4 1141.46 756.200   3
  -2 -29   3 460.776 632.699   3
   2 -29  -3-1.09213 524.665   3
  -2 -29   2 1357.30 709.741   3
   2 -29  -2 2009.75 547.662   3
  -2 -29   1 14866.4 991.852   3
   2 -29  -1 14010.4 807.573   3
  -2 -29   0 2327.29 728.638   3
   2 -29   0 1329.95 584.914   3
  -2 -29  -1 638.445 642.800   3
   2 -29   1 311.315 564.760   3
  -2 -29  -2 952.213 662.248   3
   2 -29   2 710.685 558.993   3
  -2 -29  -3 3804.43 764.183   3
   2 -29   3 3394.58 643.087   3
  -2 -29  -4 324.228 709.670   3
   2 -29   4 169.788 571.068   3
  -2 -29  -5 15710.9 981.596   3
   2 -29   5 15429.6 873.593   3
   2 -29   6 244.310 589.084   3
  -2 -29  -6 489.975 656.016   3
  -2 -29  -7 8714.15 839.410   3
   2 -29   7 7718.97 786.950   3
   2 -29   8 398.457 633.035   3
   2 -29   9 5823.20 801.379   3
   2 -29  10 3609.30 748.074   3
   2 -29  11 991.337 699.335   3
   2 -29  12 1176.84 687.859   3
   2 -29  13 4568.66 770.782   3
   2 -29  14 1328.63 731.114   3
  -2 -30  12-159.729 820.815   3
  -2 -30  11 420.332 805.672   3
  -2 -30  10 729.380 653.742   3
  -2 -30   9 1430.60 780.139   3
  -2 -30   8 6664.50 945.560   3
  -2 -30   7 3051.43 800.574   3
  -2 -30   6-107.456 683.181   3
  -2 -30   5 2013.26 806.514   3
  -2 -30   4 782.707 742.968   3
  -2 -30   3 7564.68 807.862   3
  -2 -30   2 4741.61 790.123   3
   2 -30  -2 4023.31 618.842   3
  -2 -30   1 1453.55 774.290   3
   2 -30  -1 1922.24 597.110   3
  -2 -30   0 868.616 760.045   3
   2 -30   0 1166.10 606.256   3
   2 -30   1 7926.60 749.373   3
  -2 -30  -1 9532.85 920.349   3
  -2 -30  -2 2326.68 761.694   3
   2 -30   2 2200.51 642.785   3
  -2 -30  -3 4997.50 792.268   3
   2 -30   3 5600.03 711.846   3
   2 -30   4 1363.43 643.203   3
  -2 -30  -4 596.673 710.729   3
  -2 -30  -5 2540.78 784.675   3
   2 -30   5 1826.82 665.123   3
   2 -30   6 995.235 675.281   3
  -2 -30  -6 1615.35 802.351   3
   2 -30   7 6309.74 802.592   3
  -2 -30  -7 6100.11 858.821   3
   2 -30   8 490.313 694.764   3
  -2 -30  -8 294.513 678.906   3
   2 -30   9 201.067 720.893   3
   2 -30  10 1140.64 748.096   3
   2 -30  11 2282.53 775.221   3
   2 -30  12 112.493 680.216   3
   2 -30  13-8.59766 667.018   3
  -2 -31  10 6664.56 981.149   3
  -2 -31   9 2494.83 870.058   3
  -2 -31   8 587.856 711.263   3
  -2 -31   7 6742.01 862.177   3
  -2 -31   6 5825.66 905.764   3
  -2 -31   5 2404.31 822.266   3
  -2 -31   4 380.046 737.690   3
  -2 -31   3 3786.73 737.925   3
  -2 -31   2 3062.34 761.205   3
   2 -31  -1 7276.63 707.684   3
  -2 -31   1 7910.47 903.567   3
  -2 -31   0 8284.68 934.944   3
   2 -31   0 6606.92 704.652   3
  -2 -31  -1 1930.55 811.329   3
   2 -31   1 1794.74 595.406   3
  -2 -31  -2 495.939 764.395   3
   2 -31   2 269.841 571.139   3
  -2 -31  -3 521.540 786.156   3
   2 -31   3 228.951 584.757   3
  -2 -31  -4 6385.39 890.804   3
   2 -31   4 6846.17 748.054   3
   2 -31   5 5359.36 711.959   3
  -2 -31  -5 6299.01 832.508   3
   2 -31   6 123.066 620.502   3
  -2 -31  -6 220.011 667.437   3
  -2 -31  -7 231.944 788.344   3
   2 -31   7 60.4785 606.302   3
  -2 -31  -8 2876.23 783.094   3
   2 -31   8 3319.03 714.693   3
   2 -31   9 1975.62 722.946   3
  -2 -31  -9 1455.97 803.505   3
   2 -31  10 4509.80 824.795   3
   2 -31  11 114.244 754.663   3
   2 -31  12-12.7084 724.086   3
  -2 -32   9 4559.57 817.312   3
  -2 -32   8 3929.66 882.128   3
  -2 -32   7-316.842 824.333   3
  -2 -32   6 441.370 811.010   3
  -2 -32   5-412.452 770.986   3
  -2 -32   4 1353.24 712.315   3
  -2 -32   3 2109.98 707.141   3
  -2 -32   2 6138.50 808.421   3
  -2 -32   1 279.058 710.442   3
  -2 -32   0 976.364 742.788   3
   2 -32   1 97.7784 585.927   3
  -2 -32  -1 603.267 706.297   3
  -2 -32  -2 14507.6 982.474   3
   2 -32   2 15599.5 910.067   3
   2 -32   3 1060.29 612.700   3
  -2 -32  -3 943.394 714.779   3
  -2 -32  -4-175.772 708.858   3
   2 -32   4 493.789 629.496   3
   2 -32   5 862.988 682.500   3
  -2 -32  -5 235.112 778.172   3
   2 -32   6 3651.74 765.720   3
  -2 -32  -6 4394.32 857.026   3
  -2 -32  -7 322.719 693.541   3
   2 -32   7-60.7971 693.641   3
   2 -32   8 3430.06 756.124   3
  -2 -32  -8 5165.11 904.559   3
   2 -32   9 28.2205 642.126   3
  -2 -32  -9 38.2293 706.910   3
   2 -32  10 509.272 674.137   3
  -2 -32 -10 321.040 784.996   3
   2 -32  11 478.074 715.388   3
  -2 -32 -11-213.871 795.601   3
  -2 -33   6 2546.01 850.314   3
  -2 -33   5 778.355 719.974   3
  -2 -33   4 2116.23 727.732   3
  -2 -33   3 504.860 671.815   3
  -2 -33   2 3176.64 751.180   3
  -2 -33   1 1746.49 707.621   3
  -2 -33   0 4381.26 764.350   3
  -2 -33  -1 816.985 691.846   3
   2 -33   2 591.246 617.807   3
  -2 -33  -2 738.393 747.211   3
  -2 -33  -3 2663.55 855.666   3
   2 -33   3 1676.88 681.003   3
  -2 -33  -4 3981.96 888.060   3
   2 -33   4 3584.98 736.544   3
   2 -33   5 643.326 628.897   3
  -2 -33  -5 797.825 714.192   3
  -2 -33  -6 661.057 766.704   3
   2 -33   6 432.065 612.187   3
   2 -33   7 1218.86 676.186   3
  -2 -33  -7 1618.81 818.599   3
   2 -33   8 5154.95 839.841   3
  -2 -33  -8 4482.79 832.532   3
  -2 -33  -9 3931.20 831.434   3
   2 -33   9 3567.68 821.162   3
  -2 -34   3 464.811 696.994   3
  -2 -34   2 398.272 700.419   3
  -2 -34   1 944.953 713.883   3
  -2 -34   0 38.0166 734.579   3
  -2 -34  -1 1065.99 797.861   3
  -2 -34  -2 928.242 817.285   3
  -2 -34  -3-29.1813 741.008   3
   2 -34   4 629.995 654.313   3
  -2 -34  -4 873.822 686.691   3
   2 -34   5 3838.57 732.519   3
  -2 -34  -5 2241.64 859.322   3
   2 -34   6 986.794 703.200   3
  -2 -34  -6 1180.99 744.599   3
   2 -34   7 1970.92 759.824   3
   2 -34   8 2675.62 746.873   3
   2 -35   6 258.164 669.298   3
  -3   0  26 73.0973 674.605   0
  -3   0  25 1175.61 821.283   0
  -3   0  24 186.178 555.360   3
  -3   0  24-302.891 659.150   0
  -3   0  23 4495.40 632.828   3
  -3   0  23 4404.76 825.791   0
  -3   0  22-97.8312 533.123   3
  -3   0  22 68.0167 730.616   0
  -3   0  21 11142.5 833.101   0
  -3   0  21 10854.1 695.024   3
  -3   0  20 222.554 466.512   3
  -3   0  20-85.2801 680.364   0
  -3   0  19 2647.82 512.184   3
  -3   0  19 2224.97 727.337   0
  -3   0  18 311.485 455.784   3
  -3   0  18 45.7281 662.594   0
  -3   0  17 39897.4 916.862   3
  -3   0  17 38424.6 1124.29   0
  -3   0  16 232.707 558.533   0
  -3   0  16 54.3795 396.400   3
  -3   0  15 494.860 391.286   3
  -3   0  15 275.569 562.841   0
  -3   0  14 97.2165 370.903   3
  -3   0  14 94.8902 546.083   0
  -3   0  13 20485.3 577.674   3
  -3   0  13 20735.7 809.086   0
   3   0 -13 19957.9 611.262   1
  -3   0  12 154.374 309.904   3
   3   0 -12-94.3479 372.412   1
  -3   0  12 268.270 536.690   0
  -3   0  11 225309. 1484.06   3
   3   0 -11 223587. 1608.76   1
  -3   0  10-47.7882 275.031   3
  -3   0  10-278.472 561.488   0
   3   0 -10-95.3968 373.973   1
  -3   0   9 12430.3 386.454   3
  -3   0   9 12591.9 610.220   0
   3   0  -9 12547.9 510.526   1
  -3   0   8-329.810 510.025   0
   3   0  -8 126.269 346.012   1
   3   0  -8-45.2256 200.373   3
  -3   0   8 134.382 211.791   3
  -3   0   7 98592.2 1150.09   0
   3   0  -7 93250.6 777.140   3
   3   0  -7 96428.9 1042.47   1
  -3   0   7 96820.0 763.013   3
   3   0  -6-40.2989 371.090   1
  -3   0   6 10.2887 396.910   0
  -3   0   6-13.3498 186.323   3
  -3   0   5 26571.2 625.809   0
  -3   0   5 27632.7 383.861   3
   3   0  -5 27040.7 638.976   1
  -3   0   4-302.759 385.182   0
   3   0  -4-141.018 373.211   1
  -3   0   4-12.2947 164.648   3
  -3   0   3 203589. 1295.35   0
   3   0  -3 207267. 1411.03   1
  -3   0   3 202139. 3518.80   3
   3   0  -2-14.9095 382.979   1
  -3   0   2-50.9822 299.990   0
   3   0  -2-32.6217 308.675   2
  -3   0   2 84.4576 154.029   3
   3   0  -1 24689.6 511.282   2
  -3   0   1 25944.4 468.840   0
   3   0  -1 25706.5 580.575   1
  -3   0   1 25185.4 380.626   3
   3   0   0-168.297 371.936   1
  -3   0   0 170.497 178.185   3
  -3   0   0 110.508 246.232   0
   3   0   0 258.910 326.355   2
   3   0   1 280488. 5238.19   3
  -3   0  -1 284487. 1324.09   3
   3   0   1 275642. 1540.23   1
   3   0   1 281536. 1453.65   2
  -3   0  -1 279013. 1093.06   0
   3   0   2 182.947 308.662   1
  -3   0  -2 14.3587 207.277   3
   3   0   2 129.068 259.792   3
   3   0   3 24397.7 522.639   1
   3   0   3 24678.6 517.492   3
   3   0   4 22.7272 270.308   1
   3   0   4 69.5829 301.941   3
   3   0   5 20506.5 561.441   3
   3   0   5 20205.8 461.223   1
   3   0   6 32.4268 251.952   1
   3   0   6 96.7326 342.406   3
   3   0   7 332585. 5959.14   1
   3   0   7 337600. 2033.17   3
   3   0   8 71.5989 234.634   1
   3   0   8-97.5740 421.425   3
   3   0   9 3389.65 280.112   1
   3   0   9 3599.20 488.838   3
   3   0  10-48.5981 210.766   1
   3   0  10 154.208 473.608   3
   3   0  11 70561.6 625.241   1
   3   0  11 70749.4 1173.94   3
   3   0  12 250.151 489.851   3
   3   0  13 171173. 1866.88   3
   3   0  14 175.402 604.082   3
   3   0  15 80319.4 1451.17   3
   3   0  16 350.958 570.354   3
   3   0  17 12072.8 838.740   3
   3   0  18 330.666 608.760   3
   3   0  19 10964.1 829.352   3
   3   0  20-251.583 713.478   3
   3   0  21 18460.2 1034.30   3
   3   0  22 198.763 678.577   3
   3   0  23 919.158 673.942   3
   3   0  24-16.0728 670.863   3
   3   0  25 5866.03 840.384   3
  -3   1  26 552.293 711.473   0
  -3  -1  26 773.741 716.311   0
  -3  -1  25 937.524 610.058   3
  -3  -1  25 1658.92 812.946   0
  -3   1  25 1670.39 820.082   0
  -3   1  24 1564.72 723.650   0
  -3  -1  24 1778.15 684.684   0
  -3  -1  24 1587.58 591.673   3
  -3   1  24 1141.19 581.436   3
  -3   1  23 1539.71 774.822   0
  -3  -1  23 1393.56 570.452   3
  -3   1  23 1421.59 561.618   3
  -3  -1  23 1775.92 754.850   0
  -3   1  22-192.415 720.827   0
  -3  -1  22 339.159 550.924   3
  -3   1  22 151.492 525.124   3
  -3  -1  22 973.460 753.614   0
  -3  -1  21 2419.87 545.776   3
  -3   1  21 2410.22 541.731   3
  -3   1  21 2289.97 681.497   0
  -3  -1  21 2166.50 719.744   0
  -3   1  20 1529.28 749.235   0
  -3  -1  20 1942.85 513.811   3
  -3   1  20 2172.18 491.002   3
  -3  -1  20 1453.19 631.167   0
  -3   1  19 5116.70 742.921   0
  -3  -1  19 6187.32 591.758   3
  -3   1  19 5769.89 553.983   3
  -3  -1  19 5640.40 711.053   0
  -3   1  18 9751.42 754.656   0
  -3  -1  18 9256.94 606.083   3
  -3   1  18 9349.23 587.146   3
  -3  -1  18 9716.96 801.656   0
  -3  -1  17 681.130 675.823   0
  -3  -1  17 703.723 445.532   3
  -3   1  17 539.042 414.554   3
  -3   1  17 619.700 684.864   0
  -3   1  16 125.982 662.041   0
  -3  -1  16-96.0404 410.967   3
  -3  -1  16 191.531 643.068   0
  -3   1  16 255.159 387.120   3
  -3  -1  15 45728.6 1142.91   0
  -3  -1  15 47043.7 912.595   3
  -3   1  15 46796.8 872.247   3
  -3   1  15 45337.0 1150.06   0
  -3  -1  14 143.116 365.910   3
  -3   1  14 109.746 330.272   3
  -3   1  14-135.531 562.347   0
  -3  -1  14-14.6249 553.857   0
   3   1 -14 124.531 371.808   1
  -3  -1  13 19233.6 588.463   3
  -3  -1  13 19994.4 807.754   0
   3   1 -13 19589.5 601.047   1
  -3   1  13 20118.3 814.041   0
  -3   1  13 20406.3 574.118   3
  -3  -1  12 432.232 325.215   3
  -3   1  12 370.306 315.342   3
   3   1 -12 198.340 373.179   1
   3  -1 -12 401.434 360.171   1
  -3  -1  12 33.3147 595.318   0
  -3   1  12 337.905 502.325   0
  -3  -1  11 5710.22 398.620   3
  -3   1  11 5430.59 365.607   3
  -3  -1  11 5797.39 647.236   0
  -3   1  11 5745.27 583.886   0
   3   1 -11 5629.18 455.270   1
   3  -1 -11 4915.57 458.761   1
  -3   1  10 16245.7 435.724   3
  -3  -1  10 15055.1 694.534   0
  -3   1  10 16185.8 683.918   0
   3   1 -10 15279.2 542.145   1
  -3  -1  10 15903.1 475.984   3
   3  -1 -10 16166.9 551.677   1
   3   1  -9 49405.3 800.131   1
  -3  -1   9 48414.8 940.822   0
  -3  -1   9 48925.3 676.817   3
  -3   1   9 49184.5 939.000   0
   3  -1  -9 45020.5 595.455   3
   3  -1  -9 47907.8 790.808   1
  -3   1   9 47657.8 607.501   3
  -3   1   8 22722.1 413.317   3
  -3  -1   8 21708.4 721.862   0
  -3   1   8 21255.4 708.460   0
  -3  -1   8 21604.7 460.583   3
   3  -1  -8 21940.8 597.346   1
   3  -1  -8 21509.4 403.315   3
   3   1  -8 21721.3 580.959   1
  -3   1   7 5595.86 246.583   3
   3   1  -7 4941.00 421.768   1
  -3  -1   7 5200.88 555.266   0
   3  -1  -7 5073.43 429.882   1
   3   1  -7 5591.02 280.132   3
   3  -1  -7 6035.29 244.202   3
  -3  -1   7 5474.27 301.639   3
   3  -1  -6 2333.85 414.013   1
  -3   1   6 2556.40 192.362   3
   3   1  -6 2494.83 393.399   1
  -3  -1   6 2453.61 239.821   3
  -3  -1   6 2574.80 460.913   0
   3   1  -5 112098. 1106.09   1
  -3  -1   5 113459. 1119.01   0
  -3   1   5 112184. 637.863   3
   3  -1  -5 111839. 1101.85   1
  -3  -1   5 110783. 782.419   3
  -3  -1   4 99569.7 1001.21   0
   3   1  -4 102980. 1054.47   1
  -3  -1   4 98961.5 720.760   3
   3  -1  -4 104308. 1066.94   1
  -3   1   4 102157. 569.161   3
  -3  -1   3 34010.6 625.938   0
  -3  -1   3 34685.3 556.399   2
  -3   1   3 35201.6 350.814   3
   3   1  -3 35118.8 686.216   1
  -3  -1   3 34166.6 453.795   3
   3  -1  -3 34797.7 691.976   1
  -3  -1   2 61450.4 717.903   0
   3  -1  -2 64278.2 789.625   2
   3   1  -2 62453.9 714.501   2
   3   1  -2 62760.0 828.239   1
  -3   1   2 62226.9 482.659   3
   3  -1  -2 62572.3 839.218   1
  -3  -1   2 61838.7 676.047   2
  -3  -1   1 21471.4 444.454   0
   3  -1  -1 20834.5 539.015   1
   3  -1  -1 21483.6 522.624   2
   3   1  -1 20321.7 455.943   2
  -3   1   1 21470.2 437.488   0
  -3   1   1 20927.2 321.468   3
   3   1  -1 21115.0 545.982   1
  -3  -1   1 20548.7 376.571   3
   3   1   0 37980.6 571.069   2
   3  -1   0 39304.7 633.451   2
  -3  -1   0 37707.6 515.519   3
  -3   1   0 37739.7 486.412   0
  -3   1   0 37624.2 452.008   3
  -3  -1   0 37786.3 500.894   0
   3  -1   0 36805.1 666.690   1
  -3   1  -1 242435. 3952.77   0
   3  -1   1 242057. 1399.54   2
   3  -1   1 241292. 1192.90   3
  -3   1  -1 240460. 1179.13   3
  -3  -1  -1 241701. 1289.13   3
   3  -1   1 238518. 1431.34   1
   3   1   1 241427. 1303.04   2
  -3   1  -2 71523.6 490.625   0
   3  -1   2 70902.0 809.494   1
   3  -1   2 70868.3 724.798   3
   3   1   2 71303.2 776.009   3
  -3   1  -2 67992.9 699.728   3
   3  -1   3 41348.9 617.922   3
   3  -1   3 40252.4 618.577   1
   3   1   3 40533.0 644.976   3
  -3   1  -3 39746.7 295.676   0
   3  -1   4 120.839 285.754   1
   3  -1   4 61.1967 295.602   3
   3   1   4 174.143 303.012   3
   3  -1   5 54077.4 775.878   3
   3   1   5 53877.4 807.993   3
   3   1   5 53778.4 684.709   1
   3  -1   5 52815.9 668.321   1
   3  -1   6 31.6194 232.159   1
   3   1   6 98.3824 365.080   3
   3   1   6 115.518 255.803   1
   3  -1   6 72.6693 322.244   3
   3  -1   7 30712.6 695.376   3
   3   1   7 32164.7 742.914   3
   3   1   7 30387.8 531.533   1
   3  -1   7 31228.1 528.119   1
   3  -1   8 18374.6 408.717   1
   3  -1   8 19020.8 618.192   3
   3   1   8 19032.6 628.447   3
   3   1   8 19150.9 427.770   1
   3  -1   9 121070. 880.640   1
   3  -1   9 122615. 1379.90   3
   3   1   9 122436. 1386.81   3
   3   1   9 123018. 903.690   1
   3   1   9 116860. 450.825   0
   3   1  10 19402.4 398.127   1
   3  -1  10 19381.3 702.117   3
   3   1  10 19428.8 733.775   3
   3   1  10 19176.1 245.847   0
   3   1  11 41970.6 959.800   3
   3   1  11 40087.6 396.323   0
   3  -1  11 39195.0 924.224   3
   3   1  11 39709.3 503.970   1
   3   1  12 422.423 167.184   1
   3   1  12 692.428 171.292   0
   3  -1  12 418.362 511.340   3
   3   1  12 579.014 548.894   3
   3  -1  13 886.478 613.226   3
   3   1  13 552.780 198.078   0
   3   1  13 602.295 596.712   3
   3  -1  14 18189.7 809.029   3
   3   1  14 18336.3 392.798   0
   3   1  14 17637.3 834.906   3
   3  -1  15 32953.6 1041.52   3
   3   1  15 30692.8 989.440   3
   3   1  15 33020.2 522.831   0
   3  -1  16 1966.65 635.066   3
   3   1  16 1838.57 650.091   3
   3   1  17 901.970 635.848   3
   3  -1  17 702.099 670.463   3
   3   1  18 3133.89 680.122   3
   3  -1  18 2938.22 665.972   3
   3   1  19 2615.97 699.083   3
   3  -1  19 3521.03 659.972   3
   3  -1  20 2074.69 738.569   3
   3   1  20 1986.10 749.027   3
   3  -1  21 2266.94 773.066   3
   3   1  21 2234.96 702.989   3
   3  -1  22 2018.46 800.480   3
   3   1  22 1137.53 646.142   3
   3  -1  23 1869.90 801.633   3
   3   1  23 2491.92 767.409   3
   3   1  24 2094.65 820.374   3
   3  -1  24 1184.34 831.321   3
   3  -1  25 3084.73 906.987   3
   3   1  25 3047.61 897.923   3
  -3   2  26 3179.39 848.551   0
  -3  -2  25 589.205 767.411   0
  -3  -2  25 774.987 635.793   3
  -3   2  25 976.924 739.826   0
  -3  -2  24 1059.78 609.431   3
  -3  -2  24 1019.17 666.148   0
  -3   2  24 732.462 757.945   0
  -3   2  23 1053.88 742.114   0
  -3  -2  23 1479.47 605.785   3
  -3   2  23 734.281 544.119   3
  -3  -2  23 1024.92 717.407   0
  -3   2  22 7417.85 859.305   0
  -3  -2  22 6716.72 676.698   3
  -3   2  22 6310.03 634.979   3
  -3  -2  22 7087.53 859.842   0
  -3  -2  21 3145.09 782.992   0
  -3  -2  21 3567.83 599.650   3
  -3   2  21 2089.35 721.489   0
  -3   2  21 2800.70 533.515   3
  -3   2  20 5770.20 830.326   0
  -3  -2  20 7235.50 627.494   3
  -3   2  20 6228.51 578.982   3
  -3  -2  20 6289.94 804.879   0
  -3   2  19 227.640 421.770   3
  -3  -2  19 561.674 481.503   3
  -3   2  19 543.149 590.333   0
  -3  -2  19 84.5118 641.261   0
  -3  -2  18 703.272 481.663   3
  -3   2  18 802.476 414.256   3
  -3   2  18 298.085 702.346   0
  -3  -2  18 854.744 642.410   0
  -3  -2  17 13435.5 855.366   0
  -3  -2  17 13410.6 656.562   3
  -3   2  17 12472.5 838.574   0
  -3   2  17 12925.4 611.481   3
  -3  -2  16 13235.0 839.605   0
  -3  -2  16 13237.8 628.927   3
  -3   2  16 12546.4 559.982   3
  -3   2  16 12363.6 772.295   0
  -3  -2  15 1746.86 674.497   0
  -3  -2  15 2266.21 433.161   3
  -3   2  15 2355.92 395.517   3
   3   2 -15 2104.52 379.877   1
  -3   2  15 2044.43 707.514   0
  -3   2  14 38.8438 635.241   0
  -3  -2  14 266.894 373.891   3
  -3  -2  14 139.574 580.914   0
  -3   2  14 342.202 352.346   3
   3   2 -14 344.506 370.204   1
  -3  -2  13 20582.6 840.081   0
  -3   2  13 20646.6 561.333   3
  -3   2  13 20087.2 813.110   0
  -3  -2  13 19635.3 611.821   3
   3   2 -13 19661.9 584.689   1
  -3  -2  12 178.296 339.420   3
   3   2 -12-57.1203 360.975   1
  -3   2  12 71.4220 288.273   3
  -3  -2  12 437.080 615.953   0
  -3   2  12-299.267 555.737   0
  -3  -2  11 9200.11 448.641   3
  -3   2  11 9651.82 387.536   3
   3   2 -11 9381.11 483.840   1
  -3  -2  11 9381.70 671.012   0
  -3  -2  10 10897.4 443.440   3
  -3  -2  10 10711.2 629.177   0
  -3   2  10 11697.5 373.239   3
   3   2 -10 11231.6 499.991   1
   3  -2 -10 11175.3 520.921   1
  -3  -2   9 9638.97 619.761   0
  -3   2   9 9395.34 315.227   3
   3   2  -9 8723.98 473.675   1
   3  -2  -9 9052.05 304.406   3
   3  -2  -9 8528.02 481.239   1
  -3  -2   9 9322.30 391.097   3
  -3  -2   8 40397.3 861.915   0
   3  -2  -8 40152.4 497.678   3
  -3   2   8 41024.2 491.966   3
  -3  -2   8 39641.6 612.510   3
   3  -2  -8 40445.5 749.632   1
   3   2  -8 39873.7 734.232   1
  -3  -2   7 138500. 1347.20   0
   3   2  -7 139354. 1242.22   1
   3  -2  -7 141666. 801.767   3
  -3   2   7 140608. 780.932   3
  -3  -2   7 139263. 1029.08   3
   3  -2  -7 139294. 1241.96   1
  -3   2   6 101994. 596.887   3
  -3  -2   6 104121. 1147.33   0
   3   2  -6 102569. 1072.45   1
   3  -2  -6 99869.9 1065.09   1
  -3  -2   6 99523.5 836.535   3
  -3  -2   5 53228.6 839.548   0
  -3  -2   5 51692.1 603.215   3
  -3   2   5 52827.9 380.917   3
   3  -2  -5 54447.3 816.832   1
  -3  -2   4 219836. 1445.12   0
  -3   2   4 219122. 2691.59   3
   3  -2  -4 221497. 1504.24   1
  -3  -2   4 216097. 1131.12   3
  -3  -2   3 124381. 935.065   2
  -3  -2   3 124726. 1050.91   0
  -3   2   3 124348. 531.122   3
  -3   2   3 125500. 518.441   3
  -3  -2   3 123363. 858.907   3
   3  -2  -3 124869. 1133.18   1
   3  -2  -2 208135. 1361.45   2
   3   2  -2 204818. 1164.20   2
  -3   2   2 210377. 2947.91   3
   3  -2  -2 208096. 1411.18   1
  -3  -2   2 203634. 1245.94   0
  -3  -2   2 202987. 1135.81   2
   3  -2  -1 15101.7 513.259   2
   3   2  -1 14431.0 385.465   2
  -3   2   1 14355.5 257.515   3
   3   2  -1 14760.4 368.740   0
  -3  -2   1 14907.3 407.275   0
   3  -2  -1 15229.7 504.701   1
   3   2   0 1439.05 276.576   2
   3  -2   0 1537.78 345.707   2
   3   2   0 1135.13 219.548   0
  -3   2   0 1110.90 160.638   3
   3  -2   0 1586.74 388.558   1
  -3  -2   0 1032.86 218.150   3
   3  -2   0 1215.97 189.291   3
   3   2   1 228956. 1051.48   0
   3  -2   1 230358. 1419.44   1
  -3  -2  -1 230542. 1310.52   3
   3  -2   1 233559. 4463.24   3
  -3   2  -1 228354. 1106.87   3
   3  -2   1 230658. 1415.46   2
  -3   2  -2 31743.7 479.798   3
   3   2   2 31635.0 386.912   0
   3  -2   2 31454.1 590.620   1
   3  -2   2 32934.2 510.947   3
   3  -2   3 182.478 294.849   1
   3   2   3 162.565 131.517   0
   3  -2   3 44.4836 247.986   3
   3   2   3 50.5964 286.732   3
  -3   2  -3 64.8090 101.791   0
   3   2   4 66841.5 424.481   0
   3  -2   4 69314.7 780.255   1
   3   2   4 69254.0 882.450   3
   3  -2   4 69157.6 808.762   3
   3   2   5 33722.4 674.334   3
   3  -2   5 33707.7 637.012   3
   3  -2   5 32642.4 548.842   1
   3  -2   6 4758.50 386.986   3
   3   2   6 5360.69 450.847   3
   3  -2   6 4979.97 304.691   1
   3  -2   7 99631.7 1135.19   3
   3  -2   7 99042.0 857.895   1
   3   2   7 101539. 1203.13   3
   3  -2   8 15487.1 602.770   3
   3   2   8 16100.3 635.932   3
   3  -2   8 15434.0 387.227   1
   3  -2   9 12703.8 593.205   3
   3   2   9 13584.0 634.104   3
   3   2   9 12723.7 378.453   1
   3   2  10 11992.1 358.862   1
   3   2  10 13002.0 246.247   0
   3  -2  10 12638.7 624.064   3
   3   2  10 13638.9 676.137   3
   3   2  11 12840.6 282.132   0
   3  -2  11 14437.1 697.350   3
   3   2  11 12982.7 651.402   3
   3   2  11 12221.2 345.056   1
   3   2  12 10131.6 285.831   0
   3  -2  12 10306.5 683.927   3
   3   2  12 9785.71 679.505   3
   3   2  12 10148.1 291.363   1
   3   2  13 8237.19 293.486   0
   3  -2  13 7751.85 629.116   3
   3   2  13 8214.15 667.577   3
   3   2  13 7927.85 236.264   1
   3  -2  14 2605.27 633.124   3
   3   2  14 2625.82 616.994   3
   3   2  14 2540.34 262.277   0
   3  -2  15 22527.0 892.274   3
   3   2  15 23643.0 943.945   3
   3   2  15 23051.6 477.165   0
   3   2  16 19684.0 921.593   3
   3  -2  16 18112.6 895.691   3
   3  -2  17 12955.1 859.389   3
   3   2  17 13500.6 793.777   3
   3  -2  18 8049.99 773.468   3
   3   2  18 9860.66 831.733   3
   3   2  19 3251.61 684.433   3
   3  -2  19 2738.19 658.917   3
   3  -2  20 10060.9 816.564   3
   3   2  20 11608.6 905.258   3
   3  -2  21 3813.95 747.737   3
   3   2  21 3228.07 683.492   3
   3   2  22 6067.45 843.030   3
   3  -2  22 5619.09 817.077   3
   3  -2  23 5.29723 727.062   3
   3   2  23 170.754 762.481   3
   3  -2  24 180.056 725.419   3
   3   2  24 747.941 792.510   3
   3   2  25 1992.00 815.925   3
   3  -2  25 2145.69 746.199   3
  -3  -3  26-132.638 635.903   3
  -3   3  26 254.818 783.172   0
  -3   3  25 327.244 697.320   0
  -3  -3  25 569.882 634.303   3
  -3   3  24 7397.96 919.033   0
  -3  -3  24 7260.15 743.313   3
  -3   3  23 624.033 711.563   0
  -3  -3  23 524.497 559.090   3
  -3   3  23 8.10458 506.916   3
  -3  -3  23 791.990 673.993   0
  -3  -3  22 3690.48 621.478   3
  -3   3  22 3301.99 804.233   0
  -3  -3  22 3781.79 779.332   0
  -3   3  22 3530.81 586.146   3
  -3  -3  21 762.794 735.144   0
  -3  -3  21 198.582 530.864   3
  -3   3  21 247.164 473.540   3
  -3   3  21-8.16617 710.159   0
  -3  -3  20 6137.33 610.409   3
  -3   3  20 5685.32 552.431   3
  -3  -3  20 6374.73 815.268   0
  -3   3  20 5067.73 788.502   0
  -3  -3  19 253.626 497.710   3
  -3   3  19 435.411 666.419   0
  -3   3  19 336.564 424.244   3
  -3  -3  19 636.600 692.292   0
  -3  -3  18 4441.06 726.158   0
  -3   3  18 4002.62 469.674   3
  -3   3  18 4165.82 739.224   0
  -3  -3  18 4039.75 533.349   3
  -3  -3  17 10815.4 624.083   3
  -3   3  17 10429.1 794.255   0
  -3   3  17 11049.8 571.840   3
  -3  -3  17 10143.1 767.631   0
  -3  -3  16 21.3297 437.560   3
  -3   3  16 24.2800 672.899   0
  -3   3  16 6.11472 355.804   3
   3   3 -16 15.1394 335.242   1
  -3  -3  16 190.536 562.219   0
  -3   3  15-249.395 571.927   0
  -3   3  15 328.372 341.694   3
   3   3 -15 142.870 352.136   1
  -3  -3  15 179.119 410.609   3
  -3  -3  15-19.2617 635.743   0
  -3  -3  14 3716.85 456.365   3
  -3   3  14 3099.04 688.680   0
  -3   3  14 3596.54 385.310   3
   3   3 -14 2946.23 393.196   1
  -3  -3  14 3659.20 653.182   0
  -3  -3  13 916.186 603.184   0
  -3  -3  13 714.614 394.774   3
   3   3 -13 976.329 392.315   1
  -3   3  13 804.556 299.334   3
  -3  -3  12 6694.45 464.131   3
  -3   3  12 7500.40 386.143   3
  -3  -3  12 7511.65 626.150   0
   3   3 -12 7280.64 472.753   1
  -3  -3  11 7866.54 448.541   3
  -3  -3  11 7161.73 674.566   0
   3   3 -11 7289.88 474.812   1
  -3   3  11 8332.24 360.776   3
  -3   3  10 51819.8 636.202   3
   3  -3 -10 49154.9 622.469   3
  -3  -3  10 51533.3 1030.53   0
   3   3 -10 50119.8 833.486   1
  -3  -3  10 52050.7 790.209   3
   3   3  -9 1720.46 376.226   1
   3  -3  -9 1800.32 203.251   3
  -3  -3   9 1879.52 552.833   0
  -3   3   9 1844.98 218.425   3
  -3  -3   9 2186.63 323.150   3
  -3   3   8 3739.13 216.321   3
  -3  -3   8 4210.73 495.420   0
   3   3  -8 3928.11 405.453   1
   3  -3  -8 3997.73 206.941   3
  -3  -3   8 4140.38 330.870   3
   3  -3  -8 4223.04 425.757   1
  -3   3   7 25049.0 325.173   3
  -3  -3   7 25308.2 734.930   0
   3  -3  -7 24468.4 325.955   3
  -3  -3   7 24516.8 517.535   3
   3  -3  -7 24270.3 633.931   1
  -3   3   6 256083. 3212.91   3
  -3  -3   6 259229. 1735.44   0
  -3  -3   6 253145. 1385.76   3
   3  -3  -6 256731. 1663.85   1
  -3   3   5 2703.51 90.7460   3
   3  -3  -5 2880.45 429.950   1
  -3  -3   5 3002.31 301.746   3
  -3  -3   5 2999.25 463.601   0
  -3  -3   4 127602. 1148.98   0
  -3  -3   4 126323. 946.263   2
  -3  -3   4 125142. 941.258   3
   3  -3  -4 129251. 1195.10   1
  -3  -3   3 5670.53 278.830   2
   3  -3  -3 5964.10 460.923   2
  -3  -3   3 5849.55 413.250   0
   3  -3  -3 5375.01 462.918   1
  -3   3   2 17136.6 192.943   3
   3  -3  -2 18347.5 548.095   1
   3  -3  -2 18862.9 558.848   2
  -3  -3   2 17613.3 361.961   2
   3  -3  -1 3495.16 433.452   2
  -3   3   1 3487.87 150.617   3
   3   3  -1 3664.64 282.081   0
   3   3  -1 3595.16 274.368   2
   3  -3  -1 3760.05 420.040   1
   3  -3   0 318107. 1698.07   2
   3   3   0 307781. 5161.21   2
  -3   3   0 308358. 4358.98   3
   3   3   0 306271. 1384.46   0
   3  -3   0 317095. 4527.72   3
  -3  -3   0 310216. 1525.00   3
   3  -3   0 310438. 1675.34   1
   3  -3   1 17650.0 505.678   1
  -3   3  -1 17568.4 329.812   3
   3   3   1 17898.6 359.755   0
   3  -3   1 17536.2 354.559   3
   3  -3   1 18120.9 513.858   2
  -3   3  -2 64896.5 650.617   3
   3  -3   2 66395.1 675.215   3
   3  -3   2 65660.1 799.290   1
   3   3   2 65554.9 573.407   0
   3  -3   3 2398.34 280.870   3
   3   3   3 2430.24 182.781   0
   3  -3   3 2329.44 321.839   1
   3   3   3 2193.35 358.087   3
   3  -3   4 56794.4 736.222   3
   3   3   4 57333.7 825.677   3
   3  -3   4 56175.0 720.373   1
   3  -3   5 2275.79 335.819   3
   3   3   5 2290.34 383.842   3
   3  -3   5 2072.83 288.990   1
   3   3   6 1279.74 399.052   3
   3  -3   6 1655.80 351.241   3
   3   3   7 6055.88 477.688   3
   3  -3   7 6181.04 442.045   3
   3  -3   8 3973.55 435.011   3
   3   3   8 4075.66 465.179   3
   3  -3   9 966.841 417.346   3
   3   3   9 1106.05 468.370   3
   3  -3  10 70450.6 1125.07   3
   3   3  10 70827.9 1171.36   3
   3  -3  11 36548.6 920.047   3
   3   3  11 35301.5 919.879   3
   3   3  12 308.384 211.444   1
   3   3  12 759.957 558.834   3
   3  -3  12 217.660 484.398   3
   3   3  13 1189.82 535.907   3
   3  -3  13 1146.99 580.832   3
   3   3  13 804.439 228.926   0
   3   3  13 912.713 181.971   1
   3  -3  14 22864.6 873.041   3
   3   3  14 21850.7 458.267   0
   3   3  14 21710.3 873.432   3
   3   3  15 7460.56 351.220   0
   3  -3  15 8295.97 715.155   3
   3   3  15 8252.89 739.205   3
   3  -3  16 8913.88 781.270   3
   3   3  16 8820.14 717.719   3
   3  -3  17 46.9217 663.714   3
   3   3  17 143.765 563.118   3
   3  -3  18 46494.7 1283.40   3
   3   3  18 48394.5 1317.98   3
   3   3  19 417.086 630.527   3
   3  -3  19 529.593 648.216   3
   3  -3  20 16190.3 940.259   3
   3   3  20 18005.9 1012.01   3
   3  -3  21 2495.07 705.322   3
   3   3  21 2997.70 690.161   3
   3  -3  22 1229.59 710.939   3
   3   3  22 1032.33 761.644   3
   3  -3  23 198.204 749.738   3
   3   3  23 514.493 756.058   3
   3  -3  24 11835.7 1033.38   3
   3   3  24 10328.2 901.350   3
   3  -3  25 250.935 838.165   3
   3   3  25 134.894 711.148   3
  -3  -4  26 3224.96 731.374   3
  -3   4  26 3515.41 759.018   0
  -3   4  25-113.076 768.607   0
  -3  -4  25 208.251 625.725   3
  -3   4  24 57.8918 783.408   0
  -3  -4  24 431.725 590.972   3
  -3  -4  23 1081.23 575.800   3
  -3   4  23 2222.44 715.799   0
  -3  -4  22 1460.28 667.513   0
  -3  -4  22 993.515 583.926   3
  -3   4  22 1532.63 510.900   3
  -3   4  22 932.024 785.530   0
  -3  -4  21 260.643 530.964   3
  -3   4  21-30.8325 456.577   3
  -3  -4  21 267.584 626.971   0
  -3   4  21-270.740 705.402   0
  -3  -4  20 10205.5 721.400   3
  -3   4  20 9527.96 847.602   0
  -3   4  20 9233.20 595.670   3
  -3  -4  20 9570.77 783.140   0
  -3  -4  19 575.449 518.852   3
  -3   4  19 681.806 708.142   0
  -3   4  19 599.651 431.053   3
  -3  -4  19 883.315 587.650   0
  -3  -4  18 725.885 499.498   3
  -3   4  18 818.546 590.181   0
  -3  -4  18 741.153 637.071   0
  -3   4  18 739.268 418.923   3
  -3  -4  17 5590.05 559.411   3
  -3   4  17 5874.69 797.533   0
  -3   4  17 5504.30 481.386   3
  -3  -4  17 5803.05 761.712   0
   3   4 -17 6000.54 434.084   1
  -3   4  16-212.689 557.268   0
  -3  -4  16 90.8012 439.972   3
   3   4 -16 8.65929 340.690   1
  -3   4  16 236.616 374.048   3
  -3  -4  16 305.026 601.276   0
  -3  -4  15 1969.97 465.900   3
   3   4 -15 2379.52 393.445   1
  -3   4  15 2901.04 387.640   3
  -3  -4  15 2019.28 632.463   0
  -3  -4  14 4084.04 485.354   3
  -3   4  14 3671.11 383.936   3
   3   4 -14 3659.88 406.514   1
  -3  -4  14 4156.18 660.731   0
   3   4 -13 335.196 381.216   1
  -3  -4  13 467.411 417.149   3
  -3   4  13 298.104 305.404   3
  -3  -4  13 1534.99 643.464   0
  -3  -4  12 64651.5 986.361   3
   3   4 -12 65321.5 932.100   1
  -3   4  12 62525.6 790.587   3
  -3  -4  12 63656.8 1180.83   0
   3   4 -11 1466.81 377.873   1
  -3   4  11 2187.44 278.444   3
  -3  -4  11 1614.85 534.865   0
  -3  -4  11 2065.22 384.325   3
  -3  -4  10 1504.90 363.785   3
  -3   4  10 1604.83 231.996   3
  -3  -4  10 1746.50 547.855   0
   3  -4 -10 1380.33 209.762   3
   3   4 -10 1366.08 386.929   1
   3  -4  -9 14249.0 326.909   3
  -3   4   9 14444.5 330.410   3
  -3  -4   9 13928.9 685.452   0
  -3  -4   9 14005.3 494.029   3
  -3   4   8 49680.7 481.500   3
   3  -4  -8 50092.6 484.745   3
  -3  -4   8 47904.8 902.696   0
  -3  -4   8 49984.7 746.064   3
  -3   4   7 41470.0 372.402   3
   3  -4  -7 42600.7 378.896   3
  -3  -4   7 41547.2 667.395   3
  -3  -4   7 43837.8 862.817   0
  -3   4   6 11888.3 165.303   3
  -3  -4   6 12626.0 429.569   3
  -3  -4   6 11596.7 538.131   0
  -3  -4   5 21070.6 640.928   0
  -3  -4   5 20641.4 489.692   3
  -3  -4   4 88757.6 761.232   2
  -3  -4   4 90731.4 862.280   3
  -3  -4   4 90338.5 1002.40   0
   3  -4  -4 91634.0 1049.15   1
  -3  -4   3 92458.4 731.382   2
   3  -4  -3 92856.0 1029.46   2
  -3  -4   3 91424.3 858.053   3
   3  -4  -3 94726.4 1030.72   1
   3  -4  -2 404296. 1989.99   2
   3  -4  -2 406192. 1989.66   1
  -3  -4   2 396248. 5569.51   2
  -3   4   1 31215.3 297.282   3
   3  -4  -1 31079.4 306.701   3
   3  -4  -1 30910.8 675.923   2
   3   4  -1 29858.5 431.743   2
   3  -4  -1 30319.5 641.384   1
   3  -4   0 9682.88 484.533   2
  -3   4   0 9557.28 234.038   3
   3   4   0 9098.04 287.646   2
   3  -4   0 9344.11 250.282   3
   3  -4   0 9632.76 471.842   1
   3   4   0 9258.09 333.001   0
  -3   4  -1 7570.61 246.927   3
   3   4   1 7805.84 300.198   0
   3  -4   1 7603.46 259.361   3
   3  -4   1 7457.96 441.016   2
   3  -4   1 8154.75 438.563   1
  -3   4  -2 137328. 918.654   3
   3  -4   2 137300. 1124.88   1
   3  -4   2 136007. 934.748   3
   3  -4   3 51531.3 655.695   3
   3  -4   4 76698.6 846.840   3
   3   4   4 78030.3 967.126   3
   3   4   5 4067.35 415.900   3
   3  -4   5 4278.39 359.392   3
   3  -4   6 72207.1 927.169   3
   3   4   6 70957.4 1011.23   3
   3   4   7 20187.0 672.787   3
   3  -4   7 19766.0 600.853   3
   3  -4   8 13792.0 574.950   3
   3   4   8 13399.3 625.637   3
   3  -4   9 5.71629 400.595   3
   3   4   9 123.843 439.032   3
   3  -4  10 566.874 477.229   3
   3   4  10 479.576 504.270   3
   3  -4  11 4168.30 531.776   3
   3   4  11 4247.61 561.053   3
   3  -4  12 34072.1 945.673   3
   3   4  12 33763.4 936.041   3
   3  -4  13 2556.43 562.465   3
   3   4  13 1759.94 224.147   1
   3   4  13 2218.50 624.397   3
   3  -4  14 6653.83 636.142   3
   3   4  14 6679.74 714.312   3
   3   4  15 9297.40 388.653   0
   3  -4  15 10310.0 766.115   3
   3   4  15 10274.6 779.604   3
   3  -4  16 9921.38 805.637   3
   3   4  16 10023.2 774.452   3
   3   4  17 4100.49 727.116   3
   3  -4  17 2837.64 713.026   3
   3  -4  18 9287.01 849.641   3
   3   4  18 8027.00 831.316   3
   3  -4  19 1248.93 722.293   3
   3   4  19 1427.18 628.242   3
   3  -4  20 6187.41 823.214   3
   3   4  20 5145.14 805.788   3
   3  -4  21-427.883 732.818   3
   3   4  21 477.174 650.616   3
   3  -4  22 11521.1 982.072   3
   3   4  22 12737.6 992.842   3
   3   4  23 529.288 708.596   3
   3  -4  23 355.190 767.795   3
   3  -4  24 630.117 743.600   3
   3   4  24 1365.90 762.278   3
   3  -4  25 188.411 686.863   3
   3   4  25-165.117 803.921   3
  -3  -5  27 1126.23 697.332   3
  -3   5  26 309.247 780.365   0
  -3  -5  26 333.146 669.382   3
  -3   5  25 2465.99 853.057   0
  -3  -5  25 2803.82 711.481   3
  -3  -5  24 2779.90 689.449   3
  -3   5  24 2882.57 759.535   0
  -3  -5  23 2042.08 643.739   3
  -3   5  23 1456.30 730.353   0
  -3   5  22-809.981 791.194   0
  -3  -5  22 236.767 560.296   3
  -3   5  21 1039.45 691.463   0
  -3  -5  21 1457.22 598.727   3
  -3   5  21 653.163 456.799   3
  -3   5  20 4025.90 504.887   3
  -3   5  20 3241.46 739.293   0
  -3  -5  20 3420.50 600.470   3
  -3  -5  19 12083.7 727.918   3
  -3   5  19 12870.6 920.645   0
  -3   5  19 12827.4 631.786   3
  -3  -5  19 12751.0 876.439   0
  -3  -5  18 511.455 505.590   3
  -3   5  18 422.119 604.684   0
  -3   5  18 830.638 403.689   3
  -3  -5  18 1113.79 656.977   0
  -3  -5  17 2526.19 539.538   3
  -3   5  17 2434.39 707.909   0
   3   5 -17 3038.26 398.636   1
  -3  -5  17 2440.14 609.102   0
  -3   5  17 2475.46 429.820   3
  -3  -5  16 7880.00 578.423   3
  -3   5  16 7598.15 463.629   3
   3   5 -16 7550.77 461.324   1
  -3  -5  15 6977.07 557.357   3
  -3   5  15 7606.29 449.081   3
   3   5 -15 7484.68 463.990   1
  -3  -5  15 7272.20 659.139   0
  -3  -5  14 18115.4 693.408   3
  -3   5  14 17298.6 535.207   3
   3   5 -14 17911.8 588.045   1
  -3  -5  14 18655.1 852.255   0
  -3  -5  13 33915.7 820.453   3
  -3   5  13 33474.6 643.241   3
  -3  -5  13 35445.0 1020.33   0
   3   5 -13 32682.2 728.576   1
  -3   5  12 8641.50 386.625   3
   3   5 -12 8539.02 486.748   1
  -3  -5  12 9342.30 730.640   0
  -3  -5  12 8250.57 529.512   3
  -3   5  11 1145.19 251.539   3
  -3  -5  11 1543.89 614.006   0
   3   5 -11 1271.20 391.604   1
  -3  -5  11 1069.32 395.769   3
  -3  -5  10 5514.14 441.108   3
  -3   5  10 5085.51 275.889   3
   3  -5 -10 4753.20 251.945   3
  -3  -5  10 5421.21 616.998   0
  -3   5   9 78711.5 657.596   3
   3  -5  -9 77815.4 653.524   3
  -3  -5   9 76982.8 1164.83   0
  -3  -5   9 76886.2 978.546   3
  -3   5   8 27055.9 350.423   3
  -3  -5   8 27054.9 615.172   3
   3  -5  -8 26902.1 345.421   3
  -3  -5   8 26454.7 740.043   0
  -3   5   7 23539.8 270.707   3
  -3  -5   7 23035.2 552.171   3
  -3  -5   7 23594.6 682.693   0
   3  -5  -7 22504.3 256.483   3
  -3  -5   6 116590. 1060.16   3
  -3  -5   5 104166. 988.166   3
  -3  -5   4 152226. 939.263   2
  -3  -5   4 152378. 1158.41   3
   3  -5  -3 119497. 1213.39   2
  -3  -5   3 116939. 1025.20   3
  -3  -5   3 118068. 771.964   2
   3  -5  -2 1921.63 432.435   2
  -3  -5   2 1785.33 185.486   2
   3  -5  -1 108372. 1098.10   2
   3   5  -1 104148. 686.777   2
  -3   5   1 108525. 532.447   3
   3  -5  -1 106016. 537.471   3
   3  -5   0 94349.8 1024.18   2
   3  -5   0 94223.9 620.893   3
   3   5   0 91489.0 650.195   2
  -3   5   0 93653.9 602.331   3
   3  -5   1 9361.71 278.052   3
   3  -5   1 9227.32 487.978   2
  -3   5  -1 9092.60 258.289   3
  -3   5  -2 403.703 189.411   3
   3  -5   2 412.846 225.788   3
   3  -5   3 6747.88 338.980   3
   3  -5   4 29178.8 564.646   3
   3  -5   5 303578. 1730.25   3
   3   5   5 308858. 1955.84   3
   3   5   6 17966.0 640.899   3
   3  -5   6 17027.0 533.468   3
   3  -5   7 5309.97 431.131   3
   3   5   7 5527.78 482.281   3
  -3   5  -7 5530.58 154.140   0
   3  -5   8 773.076 415.106   3
   3   5   8 595.465 419.990   3
   3   5   9 46011.2 970.504   3
   3  -5   9 46711.7 909.977   3
   3  -5  10 23667.0 762.848   3
   3   5  10 24513.9 796.313   3
   3  -5  11 17999.6 736.061   3
   3   5  11 18497.2 768.157   3
   3   5  12 2033.22 554.070   3
   3  -5  12 2387.36 522.419   3
   3  -5  13 14931.5 745.360   3
   3   5  13 15217.6 815.399   3
   3  -5  14 1867.95 600.793   3
   3   5  14 1807.26 571.873   3
   3  -5  15 77040.7 1442.82   3
   3   5  15 76125.4 1448.51   3
   3  -5  16 6861.30 751.065   3
   3   5  16 5912.39 742.366   3
   3  -5  17 527.643 678.688   3
   3   5  17 152.390 661.476   3
   3  -5  18 17455.5 959.621   3
   3   5  18 16398.0 923.668   3
   3  -5  19 9174.89 845.171   3
   3   5  19 9202.19 783.827   3
   3  -5  20 3949.40 730.163   3
   3   5  20 3895.09 788.498   3
   3  -5  21 383.593 632.991   3
   3   5  21 216.505 661.193   3
   3  -5  22 113.413 643.092   3
   3   5  22 281.083 750.415   3
   3  -5  23 4706.92 855.742   3
   3   5  23 5517.32 797.390   3
   3   5  24 4953.76 889.594   3
   3  -5  24 4742.84 922.142   3
   3   5  25 97.3144 790.567   3
  -3  -6  27 102.124 625.512   3
  -3   6  26 526.959 792.383   0
  -3  -6  26 197.600 660.640   3
  -3  -6  25 521.038 685.080   3
  -3   6  25 260.451 702.663   0
  -3  -6  24 53.1296 629.542   3
  -3   6  24-159.554 711.747   0
  -3   6  23 2328.98 824.946   0
  -3  -6  23 2251.66 641.366   3
  -3  -6  22 2099.15 610.323   3
  -3   6  22 2125.56 798.436   0
  -3  -6  21 1806.51 625.066   3
  -3   6  21 1643.00 465.008   3
  -3   6  21 1362.81 658.199   0
  -3   6  20 1388.07 440.988   3
  -3   6  20 1152.65 738.863   0
  -3  -6  20 1452.59 564.310   3
  -3   6  19 1824.81 429.113   3
  -3  -6  19 1806.97 581.048   3
  -3   6  19 1248.65 738.515   0
  -3  -6  18 1169.25 519.061   3
  -3   6  18 1665.81 415.768   3
  -3   6  17 21425.1 660.041   3
  -3  -6  17 21959.2 826.059   3
   3   6 -17 21505.7 621.762   1
   3   6 -16 431.009 367.388   1
  -3   6  16 669.879 362.941   3
  -3  -6  16 672.006 484.721   3
   3   6 -15 637.828 373.284   1
  -3  -6  15 1303.82 491.720   3
  -3   6  15 1140.34 340.625   3
  -3  -6  15 756.262 555.786   0
  -3  -6  14 900.784 475.071   3
  -3   6  14 871.258 327.037   3
  -3  -6  14 693.178 641.928   0
   3   6 -14 1060.54 388.868   1
  -3  -6  13 100442. 1315.12   3
  -3   6  13 100646. 1028.83   3
   3   6 -13 97290.6 1159.01   1
  -3  -6  13 99938.9 1485.78   0
  -3  -6  12 1264.85 447.666   3
  -3  -6  12 1494.17 642.526   0
  -3   6  12 904.289 288.028   3
   3   6 -12 1089.35 392.827   1
  -3   6  11 41526.9 598.908   3
  -3  -6  11 39262.4 956.528   0
  -3  -6  11 41019.0 844.038   3
   3  -6 -10 273.852 186.779   3
  -3   6  10 253.143 207.860   3
  -3  -6  10-7.17133 390.287   3
  -3  -6   9 2142.78 388.874   3
  -3   6   9 2183.05 206.023   3
   3  -6  -9 1888.29 189.644   3
  -3  -6   8 3316.83 402.907   3
  -3   6   8 3262.46 171.553   3
   3  -6  -8 3048.80 161.085   3
   3  -6  -7 54245.4 357.588   3
  -3  -6   7 54925.3 819.910   3
  -3  -6   6 5318.60 390.195   3
  -3  -6   5 19400.8 531.554   3
  -3  -6   4 63079.8 586.064   2
  -3  -6   4 63711.4 824.508   3
  -3  -6   3 148849. 1204.96   3
   3  -6  -3 155845. 1386.82   2
  -3  -6   3 151421. 808.484   2
   3  -6  -2 3683.08 448.842   2
   3  -6  -1 117201. 582.951   3
   3  -6  -1 116924. 1174.60   2
  -3   6   1 117690. 581.724   3
   3   6   0 27267.1 348.185   2
   3  -6   0 27778.9 371.467   3
   3  -6   0 28837.6 690.375   2
  -3   6   0 27796.4 358.431   3
   3  -6   1 136543. 868.481   3
   3  -6   1 139400. 1283.03   2
  -3   6  -1 140622. 854.338   3
   3  -6   2 52018.5 607.752   3
  -3   6  -2 51050.6 592.105   3
   3  -6   2 50803.4 862.727   2
   3  -6   3 85458.5 830.368   3
   3  -6   4 498.814 284.200   3
   3  -6   5 10097.0 440.325   3
   3  -6   6 2038.71 351.304   3
   3   6   6 1841.82 436.648   3
   3  -6   7 100537. 1153.25   3
   3   6   7 100977. 1281.92   3
  -3   6  -8 6349.13 205.100   0
   3   6   8 6087.39 538.159   3
   3  -6   8 6417.43 489.682   3
   3  -6   9 12879.4 596.090   3
  -3   6  -9 12626.7 268.801   0
   3   6   9 11755.3 668.110   3
   3  -6  10 41.6615 436.095   3
   3   6  10-77.5338 484.302   3
   3  -6  11 90565.7 1329.29   3
   3   6  11 93096.9 1396.21   3
   3  -6  12 2048.54 544.394   3
   3   6  12 1433.45 587.406   3
   3  -6  13 50361.9 1134.63   3
   3   6  13 47731.9 1124.49   3
   3  -6  14 2336.34 617.223   3
   3   6  14 3003.77 686.189   3
   3  -6  15 4593.16 699.038   3
   3   6  15 3145.79 655.884   3
   3   6  16 1066.55 590.294   3
   3  -6  16 1024.52 629.679   3
   3  -6  17 46829.4 1241.30   3
   3   6  17 43939.9 1204.52   3
   3   6  18 3645.74 657.806   3
   3  -6  18 3321.92 669.082   3
   3   6  19 415.505 641.888   3
   3  -6  19 444.951 612.203   3
   3   6  20-13.0989 701.517   3
   3  -6  20-58.6139 666.843   3
   3  -6  21 6926.23 871.236   3
   3   6  21 6274.66 789.698   3
   3  -6  22-208.326 789.691   3
   3   6  22-115.028 713.058   3
   3  -6  23 1541.55 761.731   3
   3   6  23 1819.04 752.137   3
   3   6  24-486.566 781.379   3
   3  -6  24-194.848 681.093   3
   3   6  25 638.115 706.708   3
  -3  -7  27 942.621 696.958   3
  -3  -7  26 371.009 634.346   3
  -3   7  26 103.881 719.717   0
  -3   7  25 797.804 806.757   0
  -3  -7  25 1342.49 650.597   3
  -3  -7  24 939.468 664.051   3
  -3   7  24-568.987 812.214   0
  -3  -7  23 2129.53 675.659   3
  -3   7  23 2142.29 791.646   0
  -3   7  22 586.515 659.035   0
  -3  -7  22 1190.05 597.897   3
  -3  -7  21 6203.99 702.645   3
  -3   7  21 5581.67 802.702   0
  -3  -7  20 2268.78 603.959   3
  -3   7  20 2645.54 484.840   3
  -3   7  20 2200.52 790.625   0
  -3   7  19 6498.58 509.790   3
  -3  -7  19 5410.80 658.755   3
  -3  -7  18 1616.20 540.330   3
  -3   7  18 1588.01 415.785   3
  -3  -7  17 6226.31 626.068   3
   3   7 -17 5105.67 432.605   1
  -3   7  17 5936.95 476.560   3
  -3  -7  16 7915.98 641.302   3
   3   7 -16 7311.30 472.316   1
  -3   7  16 7829.41 467.730   3
  -3  -7  15 22751.6 804.073   3
   3   7 -15 22860.5 651.740   1
  -3   7  15 25100.7 634.715   3
  -3  -7  14 13183.1 661.534   3
  -3   7  14 13503.1 480.714   3
   3   7 -14 12726.9 535.255   1
  -3   7  13 61162.0 822.955   3
  -3  -7  13 63882.3 1114.30   3
  -3  -7  12 1768.85 465.628   3
  -3   7  12 1621.00 288.174   3
  -3   7  11 7903.32 334.712   3
  -3  -7  11 7635.08 513.079   3
   3  -7 -11 6868.00 304.815   3
   3  -7 -10 164.883 184.954   3
  -3   7  10 84.9488 206.176   3
  -3  -7  10 166.415 415.471   3
  -3  -7   9 111565. 1236.36   3
  -3   7   9 112942. 763.390   3
   3  -7  -9 109734. 735.879   3
  -3  -7   8 13334.7 552.346   3
   3  -7  -8 12391.7 237.692   3
   3  -7  -7 3115.65 112.177   3
  -3  -7   7 3413.90 393.389   3
  -3  -7   6 4727.34 380.937   3
  -3  -7   5 14666.8 498.428   3
  -3  -7   4 17372.4 316.649   2
  -3  -7   4 17257.7 524.011   3
  -3  -7   3 38359.7 386.956   2
   3  -7  -3 41437.3 803.971   2
  -3  -7   3 39746.2 709.200   3
   3  -7  -2 1732.13 75.6300   3
   3  -7  -2 4627.57 429.429   2
   3  -7  -1 45123.0 395.685   3
   3  -7  -1 46641.0 824.807   2
  -3   7   1 46006.8 398.969   3
   3   7   0 27381.1 307.770   2
   3  -7   0 28428.9 385.992   3
   3  -7   0 29459.4 718.018   2
  -3   7   0 29054.7 381.030   3
   3  -7   1 116440. 818.967   3
  -3   7  -1 118969. 821.726   3
   3  -7   1 120063. 1233.25   2
   3  -7   2 3705.90 474.054   2
   3  -7   2 3846.55 267.244   3
  -3   7  -2 3637.13 241.341   3
   3  -7   3 89406.1 864.585   3
   3  -7   4 11736.9 420.880   3
   3  -7   5 154829. 1275.20   3
   3  -7   6 11166.4 479.614   3
   3  -7   7 1326.05 402.572   3
   3   7   7 1479.45 479.493   3
   3  -7   8 1956.90 437.875   3
   3   7   8 1624.82 516.330   3
  -3   7  -8 1850.91 193.227   0
  -3   7  -9 76733.0 642.190   0
   3  -7   9 74950.8 1135.58   3
   3   7   9 77049.4 1244.86   3
   3  -7  10 3876.59 531.108   3
  -3   7 -10 3846.98 225.981   0
   3   7  10 3456.66 553.490   3
   3  -7  11 18707.3 769.022   3
   3   7  11 17871.8 799.546   3
   3   7  12 7190.97 703.358   3
   3  -7  12 6757.52 648.774   3
   3  -7  13 6630.18 686.862   3
   3   7  13 6720.36 704.022   3
   3  -7  14 1379.31 608.413   3
   3   7  14 1123.02 571.411   3
   3  -7  15 32523.5 1029.96   3
   3   7  15 33446.0 1082.01   3
   3   7  16 4978.81 745.074   3
   3  -7  16 5287.47 667.570   3
   3  -7  17 3082.37 667.858   3
   3   7  17 3019.03 677.645   3
   3  -7  18 2011.19 708.337   3
   3   7  18 1070.49 659.657   3
   3  -7  19 16339.3 979.870   3
   3   7  19 16564.6 962.846   3
   3  -7  20 294.641 712.439   3
   3   7  20 202.412 708.973   3
   3  -7  21 1285.50 665.100   3
   3   7  21 1579.83 689.756   3
   3  -7  22 290.070 709.123   3
   3   7  22 362.532 716.156   3
   3  -7  23 4787.12 910.696   3
   3   7  23 4947.92 863.868   3
   3  -7  24 1025.55 826.210   3
   3   7  24 1003.95 771.323   3
   3   7  25 1866.15 750.012   3
  -3  -8  27 1490.81 731.659   3
  -3  -8  26 3594.16 796.907   3
  -3   8  25-186.805 777.981   0
  -3  -8  25 691.903 671.773   3
  -3   8  24 632.814 709.323   0
  -3  -8  24 1167.02 630.044   3
  -3  -8  23 4597.96 732.614   3
  -3   8  23 5336.03 777.428   0
  -3  -8  22 2715.81 682.319   3
  -3   8  22 4182.55 822.854   0
  -3  -8  21 1474.10 614.139   3
  -3   8  21 765.114 790.304   0
  -3  -8  20 3410.55 670.384   3
  -3  -8  19 5311.57 649.810   3
  -3   8  19 5290.13 481.279   3
  -3  -8  18 4530.29 631.282   3
  -3   8  18 4343.52 461.777   3
  -3  -8  17 10646.0 732.179   3
  -3   8  17 9831.61 529.313   3
   3   8 -17 9442.24 501.096   1
   3   8 -16 8178.57 481.998   1
  -3   8  16 8327.90 456.871   3
  -3  -8  16 8889.15 673.150   3
   3   8 -15 3287.47 422.151   1
  -3   8  15 3363.08 377.160   3
  -3  -8  15 3342.21 563.990   3
  -3   8  14 1320.81 325.604   3
  -3  -8  14 1321.20 494.043   3
  -3  -8  13 1227.34 503.998   3
  -3   8  13 1078.82 300.623   3
  -3   8  12-80.8716 261.503   3
  -3  -8  12 41.2226 456.033   3
  -3   8  11 55848.3 682.689   3
  -3  -8  11 54838.1 1002.83   3
   3  -8 -10 89.3935 185.248   3
  -3  -8  10 635.913 448.740   3
  -3  -8   9 31523.2 766.391   3
   3  -8  -9 29846.9 408.554   3
  -3  -8   8 63059.5 966.806   3
   3  -8  -8 61912.9 485.912   3
  -3  -8   7 47850.1 833.549   3
   3  -8  -7 45862.5 344.541   3
  -3  -8   6 11470.0 509.874   3
  -3  -8   5 7085.01 450.449   3
  -3  -8   4 3876.40 179.658   2
  -3  -8   4 4207.63 406.417   3
  -3  -8   3 54719.6 839.025   3
   3  -8  -3 54510.9 920.776   2
  -3  -8   3 52250.6 397.644   2
   3  -8  -2 91391.4 493.567   3
   3  -8  -2 92396.9 1126.29   2
   3  -8  -1 3725.48 181.372   3
   3  -8  -1 3705.14 483.481   2
  -3   8   1 3833.74 173.365   3
   3  -8   0 454.369 182.983   3
   3  -8   0 916.141 463.291   2
   3   8   0 539.583 88.2087   2
  -3   8   0 696.952 162.189   3
   3  -8   1 43713.1 838.054   2
   3  -8   1 43491.7 544.045   3
   3   8   1 43283.4 375.320   2
  -3   8  -1 43185.9 538.603   3
   3  -8   2 112006. 911.598   3
  -3   8  -2 111971. 903.343   3
   3  -8   2 112075. 1220.04   2
   3  -8   3 49187.6 678.968   3
   3  -8   4 3240.23 320.096   3
   3  -8   5 4110.65 365.447   3
   3  -8   6 2948.98 386.877   3
   3  -8   7 20223.4 620.292   3
   3  -8   8 1964.71 430.640   3
   3  -8   9 1324.44 434.424   3
   3   8   9 1336.36 550.215   3
  -3   8  -9 1592.28 218.399   0
  -3   8 -10 1084.42 215.406   0
   3  -8  10 820.199 453.935   3
   3   8  10 1311.61 549.361   3
   3   8  11 18125.4 822.879   3
   3  -8  11 18180.5 746.539   3
  -3   8 -11 17284.4 400.060   0
   3  -8  12 16052.1 770.280   3
   3   8  12 16246.7 811.045   3
   3   8  13 22363.1 912.380   3
   3  -8  13 21701.8 880.703   3
   3  -8  14 2078.26 619.732   3
   3   8  14 2556.09 667.537   3
   3  -8  15 5334.93 656.630   3
   3   8  15 5496.91 680.951   3
   3  -8  16 18747.5 911.994   3
   3   8  16 20387.7 950.219   3
   3  -8  17 2614.08 727.938   3
   3   8  17 1971.29 713.062   3
   3  -8  18 4723.90 750.108   3
   3   8  18 3969.19 758.851   3
   3  -8  19 557.151 623.290   3
   3   8  19 675.442 714.924   3
   3   8  20 10026.6 903.020   3
   3  -8  20 10134.0 901.699   3
   3  -8  21 6980.19 907.389   3
   3   8  21 6427.49 798.082   3
   3  -8  22 6759.93 856.090   3
   3   8  22 6232.10 845.970   3
   3  -8  23 1073.42 750.578   3
   3   8  23 2181.62 820.494   3
   3  -8  24 960.996 875.119   3
   3   8  24 854.472 721.814   3
  -3  -9  26 615.443 660.606   3
  -3   9  25 196.610 785.151   0
  -3  -9  25 539.935 658.418   3
  -3  -9  24 3335.65 750.866   3
  -3   9  24 2899.22 887.503   0
  -3  -9  23 2266.98 683.515   3
  -3   9  23 2181.14 853.756   0
  -3  -9  22 5901.46 727.500   3
  -3   9  22 5762.08 911.870   0
  -3  -9  21 441.555 633.706   3
  -3  -9  20 2982.22 639.183   3
  -3  -9  19 630.214 579.995   3
  -3   9  19 228.351 386.982   3
  -3  -9  18 7441.41 708.778   3
  -3   9  18 6751.17 487.694   3
  -3  -9  17 8135.33 693.469   3
  -3   9  17 7869.83 495.026   3
   3   9 -17 7558.89 490.549   1
  -3  -9  16 274.017 531.067   3
  -3   9  16 592.764 349.642   3
   3   9 -16 404.039 400.911   1
  -3   9  15 12.5561 316.124   3
  -3  -9  15 21.7673 527.541   3
  -3   9  14 5579.21 374.642   3
  -3  -9  14 5383.86 591.903   3
  -3   9  13 5148.34 358.835   3
  -3  -9  13 5314.77 553.013   3
  -3  -9  12 20579.6 745.815   3
  -3   9  12 20422.5 486.222   3
  -3  -9  11 3800.99 534.677   3
   3  -9 -10 53318.6 596.924   3
  -3  -9  10 53750.5 994.406   3
   3  -9  -9 2791.88 191.925   3
  -3  -9   9 2868.76 483.358   3
   3  -9  -8 4560.54 186.568   3
  -3  -9   8 4866.71 486.686   3
   3  -9  -7 480.278 102.672   3
  -3  -9   7 766.726 403.959   3
  -3  -9   6 42912.3 822.698   3
   3  -9  -6 39221.4 293.580   3
  -3  -9   5 1813.46 393.693   3
  -3  -9   4 69672.5 489.309   2
   3  -9  -4 66510.0 357.867   3
  -3  -9   4 71033.3 988.590   3
  -3  -9   3 7459.02 491.445   3
   3  -9  -3 7767.12 570.358   2
   3  -9  -3 7577.63 162.190   3
   3  -9  -2 48739.2 421.546   3
   3  -9  -2 49915.9 912.920   2
   3  -9  -1 7818.23 238.138   3
   3  -9  -1 7612.15 490.987   2
  -3   9   1 7934.82 231.038   3
   3  -9   0 242410. 4560.07   3
   3  -9   0 240281. 1763.37   2
  -3   9   0 241424. 1156.88   3
   3  -9   1 24948.5 678.647   2
  -3   9  -1 24845.9 435.454   3
   3  -9   1 25314.3 464.523   3
   3   9   1 24459.6 249.325   2
   3  -9   2 57843.2 699.989   3
   3  -9   2 59790.7 976.386   2
   3  -9   3 352.535 270.784   3
   3  -9   3 25.5201 460.224   2
   3  -9   4 87936.5 962.390   3
   3  -9   5 72.0525 319.592   3
   3  -9   6 10288.6 497.390   3
   3  -9   7 6545.63 459.321   3
   3  -9   8 10088.0 548.732   3
   3  -9   9 3949.05 517.619   3
  -3   9  -9 3474.73 264.517   0
   3  -9  10 1215.00 474.282   3
   3   9  10 1050.62 557.984   3
   3  -9  11 433.933 479.140   3
   3   9  11 404.879 526.994   3
   3  -9  12 184.140 543.016   3
   3   9  12 299.621 539.979   3
   3  -9  13 762.883 581.650   3
   3   9  13 1195.31 563.639   3
   3   9  14 40568.4 1129.29   3
   3  -9  14 41203.6 1095.12   3
   3   9  15 29339.2 1063.55   3
   3  -9  15 29524.5 1029.14   3
   3  -9  16 1057.37 666.391   3
   3   9  16 812.678 600.266   3
   3  -9  17 1897.49 616.229   3
   3   9  17 1849.98 645.066   3
   3  -9  18 16844.7 941.907   3
   3   9  18 17567.5 976.962   3
   3   9  19 3674.42 766.621   3
   3  -9  19 2457.80 750.735   3
   3  -9  20 11803.5 887.858   3
   3   9  20 13538.7 964.968   3
   3  -9  21 373.449 707.390   3
   3   9  21 249.589 647.005   3
   3  -9  22 5155.32 920.611   3
   3   9  22 4768.15 815.847   3
   3   9  23 264.178 801.055   3
   3  -9  23 639.406 700.616   3
   3  -9  24 5567.73 913.682   3
   3   9  24 6281.52 831.344   3
  -3 -10  26 4856.30 818.380   3
  -3 -10  25 570.839 722.197   3
  -3  10  25 83.8064 732.900   0
  -3  10  24-455.766 724.924   0
  -3 -10  24 798.732 643.316   3
  -3  10  23-391.147 691.972   0
  -3 -10  23 538.486 660.415   3
  -3 -10  22 5191.43 757.891   3
  -3  10  22 4978.33 798.892   0
  -3 -10  21 1001.37 600.666   3
  -3 -10  20 396.284 621.355   3
  -3 -10  19 1439.25 626.030   3
  -3 -10  18 548.460 567.870   3
  -3  10  18 367.109 365.735   3
  -3 -10  17 6224.97 663.016   3
   3  10 -17 6019.77 487.131   1
  -3  10  17 5958.42 464.349   3
  -3  10  16 21351.0 635.629   3
   3  10 -16 21498.4 680.340   1
  -3 -10  16 20298.0 842.407   3
  -3 -10  15 300.540 506.246   3
  -3  10  15-95.9918 301.396   3
  -3 -10  14 3111.10 566.184   3
  -3 -10  13 12429.9 692.387   3
  -3 -10  12 13005.9 675.993   3
  -3 -10  11 53099.1 1055.18   3
  -3 -10  10 3704.80 522.196   3
   3 -10  -9 2210.83 193.699   3
  -3 -10   9 2478.21 517.225   3
   3 -10  -8 84473.7 613.662   3
  -3 -10   8 84320.0 1181.35   3
   3 -10  -7 289.446 117.726   3
  -3 -10   7 668.775 439.715   3
   3 -10  -6 81996.4 504.792   3
  -3 -10   6 84563.6 1134.91   3
   3 -10  -6 81505.0 506.538   3
  -3 -10   5 6150.13 486.643   3
   3 -10  -5 5551.17 154.336   3
   3 -10  -5 5752.05 157.265   3
  -3 -10   4 78832.0 456.307   2
   3 -10  -4 79161.9 488.384   3
  -3 -10   4 79676.0 1087.15   3
   3 -10  -4 77697.4 487.767   3
   3 -10  -3 7364.33 595.199   2
  -3 -10   3 6593.24 484.765   3
   3 -10  -3 6500.74 192.727   3
   3 -10  -2 126248. 1354.74   2
   3 -10  -2 126554. 739.035   3
   3 -10  -1 292.749 177.952   3
   3 -10  -1 7.07324 449.902   2
   3 -10   0 6013.15 280.429   3
   3 -10   0 5961.49 557.455   2
  -3  10   0 6096.51 262.049   3
   3 -10   1 787.099 231.649   3
   3 -10   1 374.430 424.015   2
  -3  10  -1 510.600 211.271   3
   3 -10   2 149386. 1127.76   3
   3 -10   2 146711. 1451.63   2
   3 -10   3 9158.67 403.787   3
   3 -10   3 9008.92 589.043   2
   3 -10   4 22948.5 571.262   3
   3 -10   5 14133.0 523.185   3
   3 -10   6 7661.32 469.158   3
   3 -10   7 9364.85 519.971   3
   3 -10   8 60284.6 1022.62   3
   3 -10   9 6349.46 556.009   3
   3 -10  10 4692.21 574.633   3
   3 -10  11 2732.94 535.352   3
   3 -10  12 29657.8 953.763   3
   3  10  12 29845.1 991.855   3
   3 -10  13-131.397 537.059   3
   3  10  13-162.593 633.752   3
   3 -10  14 1031.95 619.298   3
   3  10  14 946.939 661.542   3
   3 -10  15 3519.17 678.625   3
   3  10  15 3629.00 661.299   3
   3 -10  16 7136.98 697.965   3
   3  10  16 6301.95 786.206   3
   3 -10  17 3208.11 729.756   3
   3  10  17 3049.49 658.597   3
   3  10  18 2476.10 664.347   3
   3 -10  18 1836.82 660.988   3
   3 -10  19 492.874 645.622   3
   3  10  19 184.118 657.927   3
   3 -10  20 11790.1 964.762   3
   3  10  20 9938.68 890.614   3
   3 -10  21 673.413 666.505   3
   3  10  21 475.873 648.629   3
   3 -10  22 12074.9 1019.54   3
   3  10  22 11100.3 924.332   3
   3 -10  23 663.649 804.826   3
   3  10  23 461.170 798.465   3
   3 -10  24 510.958 707.991   3
   3  10  24 1320.20 721.361   3
  -3 -11  26 345.863 730.482   3
  -3  11  25-779.895 830.187   0
  -3 -11  25 76.9030 644.532   3
  -3 -11  24 3196.91 721.520   3
  -3  11  24 2331.07 892.535   0
  -3  11  23 220.563 844.910   0
  -3 -11  23 1223.98 709.463   3
  -3 -11  22 164.163 606.961   3
  -3 -11  21 365.077 667.640   3
  -3 -11  20 7573.31 732.599   3
  -3 -11  19 5939.77 723.890   3
  -3 -11  18 1356.98 646.563   3
  -3 -11  17 1412.97 628.475   3
   3  11 -17 1256.69 432.126   1
  -3 -11  16 264.262 571.658   3
  -3 -11  15 18184.2 829.037   3
  -3 -11  14 14189.7 756.821   3
  -3 -11  13 1411.10 507.514   3
  -3 -11  12 1374.01 549.300   3
  -3 -11  11 11209.8 668.728   3
  -3 -11  10 74289.0 1221.21   3
  -3 -11   9 33224.6 886.313   3
   3 -11  -9 33449.9 464.611   3
   3 -11  -8 22369.2 362.078   3
  -3 -11   8 23225.3 751.080   3
   3 -11  -7 11357.1 258.839   3
   3 -11  -7 11129.7 265.249   3
  -3 -11   7 12243.2 624.737   3
   3 -11  -6 86437.1 588.351   3
  -3 -11   6 90062.7 1208.17   3
   3 -11  -6 87877.1 597.175   3
   3 -11  -5 73086.7 539.978   3
  -3 -11   5 73848.8 1103.68   3
   3 -11  -5 74458.2 539.545   3
  -3 -11   4 36555.8 829.470   3
   3 -11  -4 34723.5 388.943   3
   3 -11  -4 36628.3 401.603   3
   3 -11  -3 3878.24 529.296   2
  -3 -11   3 3616.12 462.734   3
   3 -11  -3 3722.52 197.095   3
   3 -11  -2 165.297 180.305   3
   3 -11  -2 275.715 497.177   2
   3 -11  -1 2727.88 532.348   2
   3 -11  -1 2868.78 233.926   3
   3 -11   0 85893.7 1177.19   2
  -3  11   0 85832.7 784.785   3
   3 -11   0 83311.2 775.883   3
   3 -11   1 52800.2 677.199   3
   3 -11   1 55087.9 986.437   2
   3 -11   2 19151.4 494.933   3
   3 -11   2 17784.4 708.490   2
   3 -11   3 62927.8 834.242   3
   3 -11   3 62966.7 1025.15   2
   3 -11   4 101614. 1094.17   3
   3 -11   5 474.684 349.819   3
   3 -11   6 36802.8 775.738   3
   3 -11   7 132.978 396.117   3
   3 -11   8 757.116 455.916   3
   3 -11   9 42132.9 950.092   3
   3 -11  10 25594.0 817.127   3
   3 -11  11 9974.96 683.092   3
   3 -11  12 291.126 529.500   3
   3 -11  13 18338.2 856.904   3
   3 -11  14 24854.4 965.077   3
   3 -11  15 39361.1 1145.75   3
   3  11  15 39110.6 1176.70   3
   3 -11  16 4544.44 741.511   3
   3  11  16 4955.28 709.375   3
   3 -11  17 704.494 592.611   3
   3  11  17 606.088 687.950   3
   3 -11  18 2548.88 747.463   3
   3  11  18 1885.73 654.843   3
   3 -11  19 2948.35 688.736   3
   3  11  19 2826.70 671.907   3
   3 -11  20 4223.78 817.788   3
   3  11  20 3028.59 692.224   3
   3 -11  21 82.3509 752.655   3
   3  11  21 826.702 653.152   3
   3 -11  22 656.066 715.222   3
   3  11  22 456.865 694.821   3
   3 -11  23 1571.44 852.076   3
   3  11  23 1845.62 812.649   3
   3  11  24 4998.81 854.298   3
  -3 -12  25 1301.80 684.699   3
  -3 -12  24 50.5743 716.448   3
  -3  12  24-738.690 761.303   0
  -3 -12  23 590.080 627.151   3
  -3 -12  22 681.707 694.858   3
  -3 -12  21 257.706 615.226   3
  -3 -12  20 798.259 667.196   3
  -3 -12  19 1493.49 633.836   3
  -3 -12  18 7854.42 758.637   3
  -3 -12  17 44506.8 1210.47   3
  -3 -12  16 1654.70 634.105   3
  -3 -12  15 1069.19 592.545   3
  -3 -12  14 519.634 533.859   3
  -3 -12  13 812.532 503.021   3
  -3 -12  12 494.364 541.053   3
  -3 -12  11 16894.9 761.582   3
  -3 -12  10 6540.74 593.905   3
  -3 -12   9 260.264 494.931   3
   3 -12  -8 15058.3 335.687   3
  -3 -12   8 15615.2 713.156   3
   3 -12  -7 52399.5 540.309   3
  -3 -12   7 52949.6 1020.79   3
   3 -12  -7 50832.4 534.687   3
   3 -12  -6 5475.88 216.468   3
   3 -12  -6 5358.98 234.249   3
  -3 -12   6 6087.52 556.691   3
   3 -12  -5 29216.1 396.380   3
  -3 -12   5 30325.2 815.420   3
   3 -12  -5 30196.7 413.273   3
  -3 -12   4 659.236 491.001   3
   3 -12  -4 571.256 187.923   3
  -3 -12   3 89076.7 1234.99   3
   3 -12  -3 90404.9 1268.18   2
   3 -12  -3 89612.0 714.893   3
   3 -12  -2 90459.9 1253.48   2
   3 -12  -2 87290.4 743.256   3
   3 -12  -1 22778.2 763.817   2
   3 -12  -1 21881.5 440.408   3
   3 -12   0 14501.6 686.712   2
   3 -12   0 14911.5 412.087   3
   3 -12   1 9272.07 372.954   3
   3 -12   1 9383.80 623.482   2
   3 -12   2 6613.40 532.534   2
   3 -12   2 7377.37 388.887   3
   3 -12   3 36104.5 683.521   3
   3 -12   3 36402.0 888.001   2
   3 -12   4 9783.29 633.753   2
   3 -12   4 9863.79 476.907   3
   3 -12   5 13228.3 546.268   3
   3 -12   6 16551.9 612.841   3
   3 -12   7 111776. 1342.65   3
   3 -12   8 4603.42 529.013   3
   3 -12   9 2183.42 522.078   3
   3 -12  10 779.148 473.880   3
   3 -12  11 45134.3 1079.46   3
   3 -12  12 10800.4 723.844   3
   3 -12  13 48302.1 1189.30   3
   3 -12  14 5159.37 688.430   3
   3 -12  15 2063.52 641.284   3
   3 -12  16 6770.19 761.669   3
   3 -12  17 17426.1 965.297   3
   3 -12  18 3443.61 723.175   3
   3 -12  19 1100.67 747.971   3
   3 -12  20-236.669 644.753   3
   3 -12  21 5351.80 900.579   3
   3 -12  22 2028.03 716.413   3
   3 -12  23 1636.11 879.286   3
  -3 -13  25 3041.47 761.796   3
  -3 -13  24 214.955 717.880   3
  -3 -13  23 28.1804 638.808   3
  -3 -13  22 947.479 730.986   3
  -3 -13  21 1927.37 643.488   3
  -3 -13  20 340.847 678.900   3
  -3 -13  19 19821.5 965.198   3
  -3 -13  18 1389.99 606.623   3
  -3 -13  17 1890.98 660.019   3
  -3 -13  16 2507.16 648.142   3
  -3 -13  15 7110.61 705.703   3
  -3 -13  14 2812.10 582.641   3
  -3 -13  13 15651.2 761.775   3
  -3 -13  12-51.7335 543.754   3
  -3 -13  11 2688.95 547.121   3
  -3 -13  10 3575.10 579.900   3
  -3 -13   9 64026.9 1180.53   3
  -3 -13   8 5313.20 607.206   3
   3 -13  -7 1308.69 200.887   3
   3 -13  -7 1301.64 221.107   3
  -3 -13   7 1532.43 506.718   3
  -3 -13   6 7601.94 612.120   3
   3 -13  -6 6435.76 261.076   3
   3 -13  -6 6962.41 281.570   3
   3 -13  -5 113555. 804.611   3
   3 -13  -5 114706. 818.135   3
  -3 -13   4 297.912 471.597   3
   3 -13  -4-120.741 205.501   3
  -3 -13   3 1760.53 539.361   3
   3 -13  -3 2404.71 550.723   2
   3 -13  -3 1652.68 237.536   3
   3 -13  -2 5654.59 556.739   2
   3 -13  -2 4655.82 289.176   3
  -3 -13   2 5293.17 576.826   3
   3 -13  -1 95777.0 1282.29   2
   3 -13  -1 92601.1 867.474   3
   3 -13   0 181.139 253.025   3
   3 -13   0 129.324 531.582   2
   3 -13   1 20899.5 716.208   2
   3 -13   1 20772.7 516.503   3
   3 -13   2-57.6304 530.275   2
   3 -13   2 668.382 297.605   3
   3 -13   3 2741.13 354.951   3
   3 -13   3 2827.40 508.316   2
   3 -13   4 2451.13 371.267   3
   3 -13   4 2369.17 500.265   2
   3 -13   5 98785.3 1196.88   3
   3 -13   6 1108.62 412.657   3
   3 -13   7 3727.93 489.574   3
   3 -13   8 181.813 438.484   3
   3 -13   9 49932.9 1056.85   3
   3 -13  10 3034.75 554.625   3
   3 -13  11 20737.0 826.150   3
   3 -13  12 1415.56 610.963   3
   3 -13  13 9966.77 769.136   3
   3 -13  14 1635.11 585.687   3
   3 -13  15 17839.5 922.727   3
   3 -13  16 7219.94 718.762   3
   3 -13  17 1342.53 723.255   3
   3 -13  18 1092.36 614.192   3
   3 -13  19 7990.03 886.731   3
   3 -13  20 115.229 632.558   3
   3 -13  21 3110.90 860.877   3
   3 -13  22 463.679 668.381   3
   3 -13  23 5228.55 950.704   3
  -3 -14  24 704.463 725.222   3
  -3 -14  23 1583.63 663.801   3
  -3 -14  22 1071.65 727.391   3
  -3 -14  21 2455.79 676.231   3
  -3 -14  20 3994.90 781.463   3
  -3 -14  19 354.058 645.566   3
  -3 -14  18 93.7540 593.745   3
  -3 -14  17 16058.2 887.905   3
  -3 -14  16 1411.15 647.465   3
  -3 -14  15 1608.84 631.756   3
  -3 -14  14 1112.91 590.613   3
  -3 -14  13 6638.29 654.056   3
  -3 -14  12 1013.25 584.718   3
  -3 -14  11 16789.5 776.881   3
  -3 -14  10 17941.2 806.709   3
  -3 -14   9 1369.85 541.498   3
   3 -14  -8 17413.2 428.463   3
  -3 -14   8 18841.7 775.487   3
   3 -14  -7 56562.1 656.266   3
  -3 -14   7 55613.8 1102.33   3
   3 -14  -6 10468.5 327.728   3
  -3 -14   6 11928.6 681.503   3
   3 -14  -6 11231.1 355.094   3
  -3 -14   5 601.035 553.861   3
   3 -14  -5 341.521 228.717   3
   3 -14  -5 193.325 201.998   3
  -3 -14   4 38174.6 957.910   3
   3 -14  -4 37763.3 551.924   3
  -3 -14   3 19010.4 751.524   3
   3 -14  -3 18834.0 438.227   3
   3 -14  -2 124753. 1495.95   2
  -3 -14   2 125521. 1517.09   3
   3 -14  -2 122289. 1008.89   3
   3 -14  -1 35084.9 908.280   2
   3 -14  -1 32945.9 587.520   3
   3 -14   0 24324.3 808.685   2
   3 -14   0 23513.0 542.822   3
   3 -14   1 12476.1 681.741   2
   3 -14   1 12402.2 449.503   3
   3 -14   2 11568.4 633.352   2
   3 -14   2 12512.4 477.471   3
   3 -14   3 15942.8 708.493   2
   3  14   3 16234.3 255.639   2
   3 -14   3 16658.4 545.220   3
   3 -14   4 7677.53 469.033   3
   3 -14   4 6573.60 587.186   2
   3 -14   5 1453.37 416.142   3
   3 -14   5 1362.66 535.892   2
   3 -14   6 506.013 410.251   3
   3 -14   7 21679.1 728.528   3
   3 -14   8 55.2394 444.260   3
   3 -14   9 9726.43 619.272   3
   3 -14  10 1261.29 505.317   3
   3 -14  11 65545.8 1286.19   3
   3 -14  12 10053.8 730.176   3
   3 -14  13 4934.50 644.115   3
   3 -14  14 4107.90 699.372   3
   3 -14  15 1159.14 624.214   3
   3 -14  16 11392.4 832.015   3
   3 -14  17 12128.2 897.015   3
   3 -14  18 5371.20 706.773   3
   3 -14  19 797.496 758.843   3
   3 -14  20 2463.48 708.622   3
   3 -14  21 3296.64 866.669   3
   3 -14  22 2852.28 755.072   3
  -3 -15  24 4857.84 819.224   3
  -3 -15  23 611.956 637.829   3
  -3 -15  22 4280.73 823.928   3
  -3 -15  21 315.343 634.981   3
  -3 -15  20 2728.19 777.962   3
  -3 -15  19 3341.59 702.490   3
  -3 -15  18 2204.16 625.096   3
  -3 -15  17 2192.13 681.116   3
  -3 -15  16 337.795 636.056   3
  -3 -15  15 858.627 648.964   3
  -3 -15  14 12494.5 823.003   3
  -3 -15  13 212.498 597.057   3
  -3 -15  12 1727.32 579.085   3
  -3 -15  11 7739.98 711.081   3
  -3 -15  10 1373.56 547.357   3
  -3 -15   9 2450.95 622.567   3
   3 -15  -8 347.133 253.055   3
  -3 -15   8 480.813 563.961   3
   3 -15  -7 229.886 253.305   3
  -3 -15   7 202.096 518.076   3
  -3 -15   6 139179. 1667.56   3
   3 -15  -6 137460. 1039.33   3
  -3 -15   5 21847.4 807.256   3
   3 -15  -5 20454.9 465.788   3
   3 -15  -4 48375.3 665.694   3
  -3 -15   4 50121.0 1075.83   3
  -3 -15   3 220.509 521.021   3
   3 -15  -3 216.013 261.406   3
  -3 -15   2 4842.76 613.130   3
   3 -15  -2 5853.83 670.299   2
   3 -15  -2 4520.34 348.536   3
   3 -15  -1 9352.89 660.459   2
   3 -15  -1 9621.47 423.778   3
   3 -15   0 155356. 1643.74   2
   3 -15   0 149461. 1253.48   3
   3 -15   1 453.044 334.414   3
   3 -15   1 389.998 554.294   2
   3 -15   2 5776.85 619.368   2
   3 -15   2 6148.64 429.688   3
   3 -15   3 5386.97 607.559   2
   3  15   3 4696.81 151.780   2
   3 -15   3 4984.57 426.754   3
   3 -15   4 27534.5 720.278   3
   3 -15   4 26212.2 854.645   2
   3 -15   5 6393.58 509.403   3
   3 -15   5 6916.07 596.206   2
   3 -15   6 11464.7 598.636   3
   3 -15   7 329.589 450.536   3
   3 -15   8-26.6513 461.528   3
   3 -15   9 2207.90 543.501   3
   3 -15  10 5805.23 642.036   3
   3 -15  11 5898.09 665.965   3
   3 -15  12 4597.64 628.881   3
   3 -15  13 2012.55 600.268   3
   3 -15  14 8050.56 763.430   3
   3 -15  15 9557.24 749.298   3
   3 -15  16 681.976 653.692   3
   3 -15  17 397.390 682.076   3
   3 -15  18 16671.8 972.083   3
   3 -15  19 3474.20 798.158   3
   3 -15  20 4218.26 746.816   3
   3 -15  21 1325.95 855.707   3
   3 -15  22 605.890 710.081   3
  -3 -16  23 542.563 663.389   3
  -3 -16  22 5126.03 846.597   3
  -3 -16  21 561.669 654.004   3
  -3 -16  20 5392.78 845.340   3
  -3 -16  19-61.0545 625.761   3
  -3 -16  18 491.377 654.659   3
  -3 -16  17 2988.18 735.319   3
  -3 -16  16 2192.27 682.164   3
  -3 -16  15 1653.75 637.681   3
  -3 -16  14 2548.38 635.648   3
  -3 -16  13 2190.66 662.650   3
  -3 -16  12 36541.6 1112.60   3
  -3 -16  11 55.6476 592.727   3
  -3 -16  10 5331.52 664.257   3
  -3 -16   9 1039.01 591.397   3
   3 -16  -8 30165.5 572.503   3
  -3 -16   8 32686.0 982.511   3
   3 -16  -7 249.027 262.958   3
  -3 -16   7 645.356 537.512   3
   3 -16  -6 35805.1 609.430   3
  -3 -16   6 37582.9 1024.39   3
   3 -16  -5 506.111 280.351   3
  -3 -16   5 639.989 609.384   3
  -3 -16   4 42030.0 1058.91   3
   3 -16  -4 40658.4 655.270   3
  -3 -16   3 13607.4 753.072   3
   3 -16  -3 13421.8 449.397   3
   3 -16  -2 170478. 1801.53   2
  -3 -16   2 165147. 1821.68   3
   3 -16  -2 166268. 1294.34   3
  -3 -16   1 1820.66 577.634   3
   3 -16  -1 2360.38 580.863   2
   3 -16  -1 2018.55 345.457   3
   3 -16   0 2591.13 535.078   2
   3 -16   0 3359.01 377.048   3
   3 -16   1 8538.44 608.592   2
   3 -16   1 9064.53 453.176   3
   3 -16   2 53102.1 1062.82   2
   3 -16   2 53815.3 885.800   3
   3 -16   3 452.223 382.004   3
   3  16   3 150.286 85.1919   2
   3 -16   3-49.2185 492.543   2
   3 -16   4 25591.8 854.038   2
   3  16   4 24896.8 370.839   2
   3 -16   4 26864.6 728.474   3
   3 -16   5 233.319 521.685   2
   3 -16   5 424.619 423.877   3
   3 -16   6 7378.76 559.476   3
   3 -16   6 7200.88 672.246   2
   3 -16   7 409.365 470.373   3
   3 -16   8 16478.3 747.314   3
   3 -16   9 425.330 564.796   3
   3 -16  10 431.564 541.016   3
   3 -16  11 366.400 520.487   3
   3 -16  12 18745.1 847.445   3
   3 -16  13 279.510 596.892   3
   3 -16  14 604.576 629.972   3
   3 -16  15 408.419 585.190   3
   3 -16  16 11182.2 869.787   3
   3 -16  17-184.780 671.079   3
   3 -16  18 3131.58 725.294   3
   3 -16  19 340.642 766.492   3
   3 -16  20 4669.90 767.588   3
   3 -16  21 1368.50 824.545   3
   3 -16  22 8035.21 947.648   3
  -3 -17  23 902.655 732.838   3
  -3 -17  22 1213.77 716.585   3
  -3 -17  21 290.849 737.910   3
  -3 -17  20 2017.97 708.609   3
  -3 -17  19 829.619 677.487   3
  -3 -17  18 1733.47 734.070   3
  -3 -17  17 139.192 625.053   3
  -3 -17  16 2535.61 638.989   3
  -3 -17  15 6470.56 727.868   3
  -3 -17  14 6050.88 721.603   3
  -3 -17  13 17097.4 897.034   3
  -3 -17  12 381.804 573.852   3
  -3 -17  11 651.870 601.738   3
  -3 -17  10 37829.6 1118.88   3
  -3 -17   9 8885.78 700.349   3
   3 -17  -9 9762.43 405.070   3
   3 -17  -8 182.174 258.989   3
  -3 -17   8 153.035 588.214   3
   3 -17  -7 1034.74 286.020   3
  -3 -17   7 1613.00 568.189   3
   3 -17  -6 27847.7 581.022   3
  -3 -17   6 30278.6 971.579   3
  -3 -17   5 591.498 562.906   3
   3 -17  -5 331.097 282.244   3
  -3 -17   4 60889.9 1240.18   3
   3 -17  -4 58834.2 805.790   3
  -3 -17   3 20361.6 885.155   3
   3 -17  -3 18865.6 524.148   3
  -3 -17   2 797.734 589.586   3
   3 -17  -2 1292.32 616.900   2
   3 -17  -2 458.801 319.622   3
   3 -17  -1 933.033 573.411   2
  -3 -17   1 908.167 622.091   3
   3 -17  -1 934.174 349.952   3
   3 -17   0 28227.9 879.021   2
   3 -17   0 28007.7 662.026   3
   3 -17   1 5503.05 625.520   2
   3 -17   1 5377.94 425.577   3
   3 -17   2 2339.16 401.336   3
   3 -17   2 2603.21 607.696   2
   3 -17   3 2309.58 446.431   3
   3 -17   3 2385.08 591.025   2
   3 -17   4 18824.4 765.586   2
   3 -17   4 19414.2 677.605   3
   3 -17   5 18929.9 693.933   3
   3 -17   5 18674.3 817.373   2
   3 -17   6 35920.7 903.658   3
   3 -17   6 33910.8 988.241   2
   3 -17   7 5841.84 572.269   3
   3 -17   7 6394.12 684.116   2
   3 -17   8 14509.2 737.151   3
   3 -17   9 40605.0 1054.19   3
   3 -17  10 7099.63 665.091   3
   3 -17  11 2563.89 572.031   3
   3 -17  12 764.057 541.896   3
   3 -17  13 784.512 625.132   3
   3 -17  14 19617.3 954.099   3
   3 -17  15 6410.61 709.355   3
   3 -17  16 63.8312 666.093   3
   3 -17  17 2966.82 779.724   3
   3 -17  18 3242.90 723.258   3
   3 -17  19 2529.84 836.492   3
   3 -17  20 10170.7 948.864   3
   3 -17  21-48.8282 742.830   3
  -3 -18  22 1578.39 704.366   3
  -3 -18  21 1068.81 771.593   3
  -3 -18  20 943.295 639.929   3
  -3 -18  19 527.090 735.505   3
  -3 -18  18 1048.72 646.679   3
  -3 -18  17 6278.47 776.068   3
  -3 -18  16 4106.02 765.614   3
  -3 -18  15 1566.41 700.817   3
  -3 -18  14 3769.90 692.434   3
  -3 -18  13 3723.69 689.781   3
  -3 -18  12 5917.32 740.220   3
  -3 -18  11 32138.7 1115.05   3
  -3 -18  10 99.7310 660.268   3
  -3 -18   9 184.354 574.824   3
  -3 -18   8 6763.49 691.304   3
   3 -18  -8 6371.73 377.545   3
  -3 -18   7 840.653 611.344   3
   3 -18  -7 1000.80 297.075   3
   3 -18  -6 16704.6 502.840   3
  -3 -18   6 17773.7 817.195   3
   3 -18  -5 26997.4 606.169   3
  -3 -18   5 28429.9 981.790   3
  -3 -18   4 17236.3 819.724   3
   3 -18  -4 16963.1 522.946   3
   3 -18  -3 5401.52 397.234   3
  -3 -18   3 5792.23 722.983   3
   3 -18  -2 13171.6 776.879   2
  -3 -18   2 13318.1 753.558   3
   3 -18  -2 13643.6 511.389   3
  -3 -18   1 1011.14 648.812   3
   3 -18  -1 465.350 599.968   2
   3 -18  -1 809.246 345.756   3
   3 -18   0 16.3246 589.697   2
   3 -18   0 21.5079 349.801   3
   3 -18   1 37167.7 998.008   2
   3 -18   1 37010.4 794.631   3
   3 -18   2 58341.2 1154.31   2
   3 -18   2 55536.3 962.662   3
   3 -18   3 12395.6 728.313   2
   3 -18   3 12951.4 601.969   3
   3 -18   4 633.636 593.611   2
   3 -18   4 805.373 438.358   3
   3 -18   5 7151.82 573.097   3
   3 -18   5 6951.55 694.609   2
   3 -18   6-58.6720 568.495   2
   3 -18   6 35.6844 461.632   3
   3 -18   7 40858.7 1012.35   3
   3 -18   7 41719.2 1089.31   2
   3 -18   8 50674.6 1142.66   3
   3 -18   9 5021.90 651.592   3
   3 -18  10 167.006 559.065   3
   3 -18  11 2102.00 557.979   3
   3 -18  12 9973.51 732.395   3
   3 -18  13 12539.6 824.619   3
   3 -18  14 2617.75 698.429   3
   3 -18  15 1276.70 660.660   3
   3 -18  16 3409.43 692.375   3
   3 -18  17 5411.29 834.066   3
   3 -18  18 3114.52 767.705   3
   3 -18  19 1526.21 767.564   3
   3 -18  20 1124.60 829.706   3
   3 -18  21 2586.07 741.204   3
  -3 -19  22 450.588 787.929   3
  -3 -19  21 2076.38 710.177   3
  -3 -19  20 1352.55 791.668   3
  -3 -19  19 4739.63 744.967   3
  -3 -19  18 653.785 721.462   3
  -3 -19  17 1243.70 714.789   3
  -3 -19  16 1218.37 647.933   3
  -3 -19  15 16694.9 933.794   3
  -3 -19  14 268.082 652.484   3
  -3 -19  13 10221.7 848.284   3
  -3 -19  12 299.390 668.961   3
  -3 -19  11 3176.33 709.717   3
  -3 -19  10 1928.84 686.065   3
  -3 -19   9 43693.2 1181.58   3
  -3 -19   8-132.850 551.499   3
   3 -19  -8 61.0525 291.795   3
   3 -19  -7 1179.54 315.630   3
  -3 -19   7 1139.85 627.264   3
   3 -19  -6 2262.20 340.320   3
  -3 -19   6 3069.56 677.334   3
  -3 -19   5 15034.6 806.437   3
   3 -19  -5 15743.0 522.731   3
   3 -19  -4 2230.50 350.872   3
  -3 -19   4 3006.78 681.775   3
  -3 -19   3 1279.05 646.053   3
   3 -19  -3 1300.87 353.297   3
  -3 -19   2 1495.87 594.879   3
   3 -19  -2 1362.00 363.444   3
  -3 -19   1 23721.7 938.547   3
   3 -19  -1 21314.3 890.946   2
   3 -19  -1 22177.1 648.678   3
  -3 -19   0 12487.1 825.341   3
   3 -19   0 11469.0 740.844   2
   3 -19   0 12230.3 564.853   3
   3 -19   1 48808.6 1106.63   2
   3 -19   1 47219.2 915.643   3
   3 -19   2 3178.63 449.533   3
   3 -19   2 3548.51 641.696   2
   3 -19   3 34780.2 992.854   2
   3 -19   3 37426.2 876.857   3
   3 -19   4 6332.82 689.646   2
   3 -19   4 6130.18 540.828   3
   3 -19   5 10772.6 711.305   2
   3 -19   5 12266.6 644.449   3
   3 -19   6 1137.23 484.902   3
   3 -19   6 818.243 550.850   2
   3 -19   7 4663.51 599.083   3
   3 -19   7 4846.82 663.933   2
   3 -19   8 3076.55 657.394   2
   3 -19   8 2297.96 589.225   3
   3 -19   9 70308.7 1373.55   3
   3 -19  10 400.218 577.492   3
   3 -19  11 4289.62 648.231   3
   3 -19  12 4204.13 624.011   3
   3 -19  13 2833.97 615.344   3
   3 -19  14 5794.17 762.057   3
   3 -19  15 19399.9 1020.14   3
   3 -19  16 11.4005 596.381   3
   3 -19  17 1629.07 722.542   3
   3 -19  18 1565.80 820.623   3
   3 -19  19 15780.5 1014.06   3
   3 -19  20 2326.41 831.029   3
  -3 -20  21 1903.71 814.770   3
  -3 -20  20 339.891 662.902   3
  -3 -20  19 23.1791 747.654   3
  -3 -20  18 465.552 651.901   3
  -3 -20  17 4482.82 786.172   3
  -3 -20  16 247.293 708.892   3
  -3 -20  15 1130.66 633.018   3
  -3 -20  14 519.593 597.248   3
  -3 -20  13 6583.69 767.461   3
  -3 -20  12 444.959 671.543   3
  -3 -20  11 12125.4 860.298   3
  -3 -20  10 1383.61 691.666   3
  -3 -20   9 3658.19 694.796   3
  -3 -20   8 4159.90 674.616   3
   3 -20  -7 7919.28 442.889   3
  -3 -20   7 8880.03 730.636   3
   3 -20  -6 811.446 332.341   3
  -3 -20   6 1012.13 602.226   3
  -3 -20   5 2464.99 694.530   3
   3 -20  -5 2538.39 350.151   3
   3 -20  -4 7941.98 461.239   3
  -3 -20   4 9058.99 792.361   3
  -3 -20   3 37648.0 1104.58   3
   3 -20  -3 34685.1 745.658   3
  -3 -20   2 344.853 584.939   3
   3 -20  -2 475.584 349.210   3
   3 -20  -1 947.879 397.101   3
  -3 -20   1 994.414 611.768   3
   3 -20  -1 182.943 618.720   2
   3 -20   0 622.002 586.099   2
  -3 -20   0 1028.84 647.454   3
   3 -20   0 401.196 394.182   3
   3 -20   1 2370.84 654.494   2
   3 -20   1 1885.28 431.311   3
   3 -20   2 8741.45 691.909   2
   3 -20   2 9253.14 576.325   3
   3 -20   3 20426.8 865.913   2
   3 -20   3 19189.0 706.432   3
   3 -20   4 16962.8 781.441   2
   3 -20   4 17771.6 720.891   3
   3 -20   5 1785.11 496.701   3
   3 -20   5 1258.81 555.584   2
   3 -20   6-198.140 491.075   3
   3 -20   6-55.1294 535.678   2
   3 -20   7 43568.3 1087.61   3
   3 -20   7 41928.7 1105.91   2
   3 -20   8 840.054 551.742   3
   3 -20   8 1075.72 631.597   2
   3 -20   9 1737.13 596.137   3
   3 -20   9 1611.07 610.444   2
   3 -20  10 1154.78 595.696   3
   3 -20  11 4120.57 675.306   3
   3 -20  12-26.9014 596.147   3
   3 -20  13 7395.35 741.913   3
   3 -20  14 3613.03 663.159   3
   3 -20  15 557.419 699.071   3
   3 -20  16 1199.56 727.289   3
   3 -20  17 11368.1 894.859   3
   3 -20  18 384.847 728.718   3
   3 -20  19 3262.27 861.449   3
   3 -20  20 3459.12 783.570   3
  -3 -21  20 1407.97 815.897   3
  -3 -21  19 965.326 661.093   3
  -3 -21  18 1029.10 776.087   3
  -3 -21  17-62.2814 628.169   3
  -3 -21  16-87.5480 709.423   3
  -3 -21  15 7309.80 842.804   3
  -3 -21  14 1043.15 627.644   3
  -3 -21  13 4825.13 700.580   3
  -3 -21  12-155.615 645.635   3
  -3 -21  11 2255.94 730.241   3
  -3 -21  10 8257.13 836.766   3
  -3 -21   9 11278.4 863.465   3
  -3 -21   8 91.2253 685.363   3
  -3 -21   7 3240.75 723.572   3
   3 -21  -6 15250.3 566.911   3
  -3 -21   6 15530.0 896.146   3
  -3 -21   5 16644.1 903.627   3
   3 -21  -5 14830.7 555.691   3
   3 -21  -4 33043.4 748.309   3
  -3 -21   4 33014.2 1086.36   3
  -3 -21   3 217.371 586.619   3
   3 -21  -3 292.684 361.479   3
  -3 -21   2 12665.5 810.100   3
   3 -21  -2 11058.3 554.926   3
   3 -21  -1 16511.2 797.244   2
  -3 -21   1 17332.7 874.371   3
   3 -21  -1 16161.6 623.692   3
   3 -21   0 76917.7 1383.28   2
  -3 -21   0 80310.0 1507.65   3
   3 -21   0 77472.5 1165.45   3
   3 -21   1 310.193 566.219   2
   3 -21   1 253.480 427.553   3
  -3 -21  -1 450.508 632.084   3
   3 -21   2 6383.50 687.628   2
   3 -21   2 6740.05 530.756   3
   3 -21   3 3349.06 587.576   2
   3 -21   3 3783.62 500.936   3
   3 -21   4 16887.1 815.247   2
   3 -21   4 17561.2 729.097   3
   3 -21   5 46291.8 1138.48   2
   3 -21   5 45641.3 1059.18   3
   3 -21   6 7210.31 678.045   2
   3 -21   6 7259.03 627.827   3
   3 -21   7 1586.49 553.982   3
   3 -21   7 1117.71 563.012   2
   3 -21   8 775.010 614.700   2
   3 -21   8 1276.54 541.980   3
   3 -21   9 11907.0 750.698   3
   3 -21   9 13314.1 789.064   2
   3 -21  10 1297.90 557.098   3
   3 -21  10 1453.09 566.521   2
   3 -21  11 3237.97 613.798   3
   3 -21  12 605.267 620.079   3
   3 -21  13 1560.75 671.086   3
   3 -21  14 2787.30 717.599   3
   3 -21  15 7277.82 769.269   3
   3 -21  16-111.608 690.965   3
   3 -21  17 803.607 794.753   3
   3 -21  18 10598.7 949.533   3
   3 -21  19 8598.11 913.436   3
  -3 -22  19-108.310 765.496   3
  -3 -22  18 590.607 714.836   3
  -3 -22  17-35.9903 747.521   3
  -3 -22  16 2104.16 675.705   3
  -3 -22  15-33.4549 710.142   3
  -3 -22  14 692.676 696.094   3
  -3 -22  13 3572.09 681.905   3
  -3 -22  12 5773.78 795.827   3
  -3 -22  11 617.257 706.325   3
  -3 -22  10 1316.66 717.146   3
  -3 -22   9 881.315 673.170   3
  -3 -22   8 22921.8 1009.41   3
  -3 -22   7 2374.64 650.100   3
  -3 -22   6 14937.6 850.453   3
  -3 -22   5 233.689 593.840   3
   3 -22  -5-13.4562 359.196   3
   3 -22  -4 4538.70 443.996   3
  -3 -22   4 4702.35 704.678   3
  -3 -22   3 1709.83 628.962   3
   3 -22  -3 1967.72 418.805   3
  -3 -22   2 78091.9 1518.21   3
   3 -22  -2 80334.2 1184.47   3
  -3 -22   1 4473.26 722.244   3
   3 -22  -1 3708.37 467.028   3
   3 -22   0 2261.72 453.427   3
   3 -22   0 2534.46 658.565   2
  -3 -22   0 3210.38 739.107   3
  -3 -22  -1 1861.92 704.895   3
   3 -22   1 1111.11 575.008   2
   3 -22   1 1496.86 456.275   3
   3 -22   2 8868.84 579.158   3
   3 -22   2 8252.06 664.727   2
   3 -22   3 2208.15 482.443   3
   3 -22   3 2117.95 615.757   2
   3 -22   4 12936.8 793.418   2
   3 -22   4 12958.8 685.428   3
   3 -22   5 5634.52 689.005   2
   3 -22   5 5565.80 607.017   3
   3 -22   6 8083.78 711.489   2
   3 -22   6 8906.45 674.905   3
   3 -22   7 418.986 526.154   3
   3 -22   7 315.347 525.310   2
   3 -22   8 1266.55 575.909   3
   3 -22   8 662.555 611.326   2
   3 -22   9 5989.29 691.374   3
   3 -22   9 5334.44 641.055   2
   3 -22  10 759.575 623.125   3
   3 -22  10 1248.01 573.118   2
   3 -22  11 837.480 622.079   3
   3 -22  11 501.536 564.119   2
   3 -22  12 12521.4 836.678   3
   3 -22  13 429.508 589.383   3
   3 -22  14 1134.92 682.698   3
   3 -22  15 1549.37 754.353   3
   3 -22  16 10997.7 939.812   3
   3 -22  17 4381.27 776.217   3
   3 -22  18 5081.90 897.962   3
   3 -22  19 524.347 784.400   3
  -3 -23  19 113.485 810.916   3
  -3 -23  18 1242.15 708.095   3
  -3 -23  17 845.877 805.049   3
  -3 -23  16 450.267 678.581   3
  -3 -23  15 879.970 731.345   3
  -3 -23  14 4400.17 812.433   3
  -3 -23  13 385.875 635.360   3
  -3 -23  12 380.637 721.945   3
  -3 -23  11 72.8446 704.159   3
  -3 -23  10 6143.25 761.372   3
  -3 -23   9 3640.13 673.718   3
  -3 -23   8 5263.07 745.597   3
  -3 -23   7 4511.39 766.923   3
  -3 -23   6 37526.0 1208.03   3
  -3 -23   5 1957.71 705.673   3
   3 -23  -4 20091.6 679.518   3
  -3 -23   4 19778.2 960.263   3
  -3 -23   3 126.209 589.499   3
   3 -23  -3 327.827 375.204   3
  -3 -23   2 2240.48 663.205   3
   3 -23  -2 1422.21 425.028   3
  -3 -23   1 282.817 667.255   3
   3 -23  -1 773.252 426.822   3
  -3 -23   0 22405.6 1020.79   3
   3 -23   0 22210.4 887.982   2
   3 -23   0 21171.7 732.611   3
   3 -23   1 1060.36 601.190   2
  -3 -23  -1 649.313 606.315   3
   3 -23   1 1101.53 459.095   3
   3 -23   2 15447.5 821.238   2
  -3 -23  -2 16743.3 968.187   3
   3 -23   2 15918.6 697.637   3
   3 -23   3 1963.75 504.205   3
   3 -23   3 1568.80 589.578   2
   3 -23   4 4717.46 637.391   2
   3 -23   4 4864.86 574.379   3
   3 -23   5 2370.97 553.464   3
   3 -23   5 2912.12 623.920   2
   3 -23   6 6977.86 706.169   2
   3 -23   6 6176.79 629.832   3
   3 -23   7 1529.32 557.152   3
   3 -23   7 1590.73 569.397   2
   3 -23   8 2918.45 649.890   2
   3 -23   8 2453.13 583.534   3
   3 -23   9 2954.22 606.127   2
   3 -23   9 3225.57 608.414   3
   3 -23  10 18625.6 912.374   3
   3 -23  10 18089.9 863.199   2
   3 -23  11 303.310 551.503   2
   3 -23  11 206.760 566.769   3
   3 -23  12 1273.94 667.201   3
   3 -23  12 751.428 626.568   2
   3 -23  13 1720.82 719.044   3
   3 -23  14 1711.06 719.179   3
   3 -23  15 711.204 658.044   3
   3 -23  16 5963.83 846.174   3
   3 -23  17 590.692 794.235   3
   3 -23  18 8994.24 919.745   3
  -3 -24  18 1955.87 794.341   3
  -3 -24  17 4826.39 884.561   3
  -3 -24  16 1229.86 739.650   3
  -3 -24  15 3167.47 802.727   3
  -3 -24  14 41.7770 729.133   3
  -3 -24  13 966.666 656.450   3
  -3 -24  12 7635.26 883.358   3
  -3 -24  11 5409.37 778.002   3
  -3 -24  10 359.385 616.586   3
  -3 -24   9 363.700 706.744   3
  -3 -24   8 2988.20 756.218   3
  -3 -24   7 10231.2 816.301   3
  -3 -24   6 3272.89 684.672   3
  -3 -24   5 3403.38 751.260   3
  -3 -24   4 1266.04 710.851   3
  -3 -24   3 691.189 641.055   3
   3 -24  -3 267.450 407.784   3
  -3 -24   2 11098.2 827.102   3
   3 -24  -2 10651.5 590.133   3
  -3 -24   1 7098.99 834.681   3
   3 -24  -1 6511.33 544.532   3
  -3 -24   0 2585.99 712.397   3
   3 -24   0 3143.01 649.400   2
   3 -24   0 2877.02 486.224   3
   3 -24   1 12981.7 672.967   3
   3 -24   1 12997.1 772.394   2
  -3 -24  -1 14042.6 927.589   3
  -3 -24  -2 6069.16 794.018   3
   3 -24   2 5912.88 649.923   2
   3 -24   2 5691.99 557.840   3
   3 -24   3 305.458 532.435   2
   3 -24   3 620.219 466.672   3
   3 -24   4 6825.14 660.585   2
   3 -24   4 7531.98 635.026   3
   3 -24   5 12505.7 758.509   2
   3 -24   5 12672.5 732.377   3
   3 -24   6 9692.67 741.170   2
   3 -24   6 10631.5 717.517   3
   3 -24   7 8821.63 697.674   3
   3 -24   7 8347.60 722.249   2
   3 -24   8 5929.65 684.671   2
   3 -24   8 5416.30 641.871   3
   3 -24   9 162.084 567.569   3
   3 -24   9 203.815 541.647   2
   3 -24  10 693.929 561.640   2
   3 -24  10 794.751 631.180   3
   3 -24  11 8764.03 824.448   3
   3 -24  11 8568.64 742.123   2
   3 -24  12 8843.38 862.975   3
   3 -24  12 8101.23 776.682   2
   3 -24  13 7483.38 798.435   3
   3 -24  13 8429.75 817.357   2
   3 -24  14 670.810 648.934   3
   3 -24  14 1030.62 657.018   2
   3 -24  15 2046.09 803.911   3
   3 -24  16 5998.23 900.950   3
   3 -24  17 1282.85 694.576   3
  -3 -25  17 60.5328 745.782   3
  -3 -25  16 1740.36 770.956   3
  -3 -25  15 2830.17 820.159   3
  -3 -25  14-117.802 737.029   3
  -3 -25  13 3010.68 775.905   3
  -3 -25  12 740.833 746.540   3
  -3 -25  11 1368.61 641.865   3
  -3 -25  10 3144.70 783.532   3
  -3 -25   9 12856.7 922.851   3
  -3 -25   8-64.7245 633.973   3
  -3 -25   7 59.4209 731.984   3
  -3 -25   6 506.898 690.841   3
  -3 -25   5 9559.97 801.135   3
  -3 -25   4 2402.11 774.016   3
  -3 -25   3 9275.71 845.461   3
  -3 -25   2-64.8732 648.861   3
   3 -25  -2 201.175 433.614   3
  -3 -25   1 6821.79 830.393   3
   3 -25  -1 5774.47 544.799   3
  -3 -25   0 6383.17 734.615   3
   3 -25   0 6484.23 564.809   3
  -3 -25  -1 5645.28 818.385   3
   3 -25   1 5651.76 698.511   2
   3 -25   1 4998.45 562.743   3
  -3 -25  -2 1181.03 690.057   3
   3 -25   2 990.778 485.544   3
   3 -25   2 543.564 610.552   2
   3 -25   3 1133.42 511.647   3
   3 -25   3 1532.09 616.070   2
  -3 -25  -3 1201.56 666.709   3
   3 -25   4 8932.86 741.788   2
   3 -25   4 8329.01 663.241   3
   3 -25   5 3326.71 604.755   2
   3 -25   5 3830.30 604.816   3
   3 -25   6 431.452 550.767   2
   3 -25   6 365.275 535.668   3
   3 -25   7 468.348 556.778   3
   3 -25   7 663.505 591.486   2
   3 -25   8 1280.09 602.019   3
   3 -25   8 1150.64 592.470   2
   3 -25   9 10159.0 742.606   2
   3 -25   9 10401.7 809.534   3
   3 -25  10 3857.98 721.089   3
   3 -25  10 3034.18 622.059   2
   3 -25  11 2224.07 627.198   2
   3 -25  11 2571.56 700.374   3
   3 -25  12 2679.70 675.542   2
   3 -25  12 2316.89 670.165   3
   3 -25  13 6703.26 811.082   3
   3 -25  13 6765.04 827.021   2
   3 -25  14 714.368 662.718   2
   3 -25  14 1063.61 782.927   3
   3 -25  15 10240.3 971.847   3
   3 -25  15 8960.45 828.061   2
   3 -25  16 1923.70 696.478   3
   3 -25  17 482.500 690.042   3
  -3 -26  16-130.524 753.243   3
  -3 -26  15 1912.05 828.873   3
  -3 -26  14 77.2798 707.980   3
  -3 -26  13 2210.00 832.070   3
  -3 -26  12 254.570 678.750   3
  -3 -26  11 4399.49 833.264   3
  -3 -26  10 479.231 710.680   3
  -3 -26   9 190.768 690.454   3
  -3 -26   8 599.255 760.366   3
  -3 -26   7 13557.0 901.188   3
  -3 -26   6 1001.76 766.566   3
  -3 -26   5 533.591 667.505   3
  -3 -26   4 3258.62 775.471   3
  -3 -26   3 18784.7 1026.00   3
  -3 -26   2 3680.04 741.574   3
  -3 -26   1 5124.56 808.404   3
   3 -26  -1 4847.09 548.729   3
  -3 -26   0 2078.90 748.198   3
   3 -26   0 2030.16 488.405   3
   3 -26   1 8773.89 702.612   2
  -3 -26  -1 9136.55 822.931   3
   3 -26   1 8272.37 622.553   3
  -3 -26  -2 742.265 745.578   3
   3 -26   2 1096.93 556.816   2
   3 -26   2 366.864 476.529   3
   3 -26   3 9488.74 723.593   2
  -3 -26  -3 9628.63 899.526   3
   3 -26   3 9212.15 672.861   3
   3 -26   4 3081.75 574.354   3
   3 -26   4 2923.60 629.507   2
  -3 -26  -4 2715.49 739.596   3
   3 -26   5 473.882 553.258   3
   3 -26   5 541.064 590.440   2
   3 -26   6 187.048 554.677   3
   3 -26   6-211.244 552.744   2
   3 -26   7 7509.92 745.317   2
   3 -26   7 7839.25 731.337   3
   3 -26   8 775.137 603.204   3
   3 -26   8 262.226 578.477   2
   3 -26   9 1860.48 658.265   3
   3 -26   9 1918.12 590.437   2
   3 -26  10 359.490 609.690   3
   3 -26  10 152.844 546.403   2
   3 -26  11 11851.0 869.636   3
   3 -26  11 11519.0 810.275   2
   3 -26  12 594.682 653.221   2
   3 -26  12 1011.06 648.173   3
   3 -26  13 10505.5 962.239   3
   3 -26  13 9937.31 878.952   2
   3 -26  14 1792.06 703.555   2
   3 -26  14 2375.07 819.818   3
   3 -26  15 2903.90 712.920   2
   3 -26  15 2713.93 728.676   3
   3 -26  16 50.7873 694.282   3
   3 -26  16-220.245 700.210   2
   3 -26  17 1586.42 731.229   2
  -3 -27  15 6284.67 944.566   3
  -3 -27  14 9.77959 673.415   3
  -3 -27  13-432.764 799.361   3
  -3 -27  12 374.709 709.805   3
  -3 -27  11 2549.57 811.922   3
  -3 -27  10 800.833 721.661   3
  -3 -27   9 6093.85 882.921   3
  -3 -27   8 1671.84 731.113   3
  -3 -27   7 4732.46 853.437   3
  -3 -27   6 7456.84 838.326   3
  -3 -27   5 13955.7 1000.47   3
  -3 -27   4 8692.67 859.448   3
  -3 -27   3 1241.86 764.845   3
  -3 -27   2 509.984 719.211   3
  -3 -27   1 2478.24 720.347   3
  -3 -27   0 7364.64 900.309   3
   3 -27   0 7211.67 605.916   3
  -3 -27  -1 9541.86 880.319   3
   3 -27   1 9631.47 655.607   3
   3 -27   2 2265.38 545.447   3
   3 -27   2 1472.13 614.354   2
  -3 -27  -2 1973.84 671.344   3
   3 -27   3 11136.5 766.755   2
  -3 -27  -3 12166.3 916.212   3
   3 -27   3 12286.3 745.021   3
   3 -27   4 3949.01 637.914   2
  -3 -27  -4 4507.01 835.407   3
   3 -27   4 4464.59 620.686   3
   3 -27   5 10158.0 796.445   2
   3 -27   5 10379.8 744.480   3
   3 -27   6 1326.26 591.630   2
   3 -27   6 1388.06 604.738   3
   3 -27   7 673.441 598.601   3
   3 -27   7 404.213 618.718   2
   3 -27   8 422.613 606.426   3
   3 -27   8 114.967 546.966   2
   3 -27   9 3887.90 685.613   3
   3 -27   9 4176.63 657.786   2
   3 -27  10 527.974 608.811   3
   3 -27  10 133.264 569.662   2
   3 -27  11 2175.53 670.901   3
   3 -27  11 2967.61 662.936   2
   3 -27  12 2080.24 694.497   2
   3 -27  12 2601.91 769.304   3
   3 -27  13 2030.23 732.402   2
   3 -27  13 2779.53 830.016   3
   3 -27  14 1714.50 708.536   2
   3 -27  14 1938.77 742.399   3
   3 -27  15 3268.13 728.390   3
   3 -27  15 2697.26 687.409   2
   3 -27  16 669.110 702.881   2
   3 -27  17 274.805 694.483   2
  -3 -28  13 1759.85 739.790   3
  -3 -28  12 2360.45 871.056   3
  -3 -28  11 131.279 663.891   3
  -3 -28  10 390.679 803.250   3
  -3 -28   9 257.462 727.172   3
  -3 -28   8 5811.87 840.245   3
  -3 -28   7 5759.68 861.652   3
  -3 -28   6 8972.95 868.375   3
  -3 -28   5 512.449 791.417   3
  -3 -28   4 5560.26 764.998   3
  -3 -28   3 5439.22 854.163   3
  -3 -28   2 10281.5 957.116   3
  -3 -28   1 934.872 684.108   3
  -3 -28   0 1112.18 757.274   3
  -3 -28  -1 4962.35 863.761   3
   3 -28   1 4709.68 593.661   3
   3 -28   2 12715.3 828.706   2
  -3 -28  -2 12393.6 996.876   3
   3 -28   2 12064.6 742.442   3
   3 -28   3 5265.62 709.822   2
  -3 -28  -3 5057.91 854.728   3
   3 -28   3 4503.67 635.413   3
   3 -28   4 4876.55 650.920   2
  -3 -28  -4 5612.24 849.130   3
   3 -28   4 5092.95 654.987   3
   3 -28   5 411.034 565.908   3
  -3 -28  -5 557.760 762.968   3
   3 -28   5 463.088 599.829   2
   3 -28   6 308.278 561.977   3
   3 -28   6 370.038 582.737   2
   3 -28   7 573.687 604.127   3
   3 -28   7 354.897 621.144   2
   3 -28   8 4139.97 702.395   3
   3 -28   8 4664.23 659.134   2
   3 -28   9 1191.31 660.840   3
   3 -28   9 1411.87 597.006   2
   3 -28  10 490.500 617.105   3
   3 -28  10 1608.86 616.638   2
   3 -28  11 217.437 639.925   3
   3 -28  11 519.464 596.056   2
   3 -28  12 4288.76 825.804   3
   3 -28  12 4617.95 741.493   2
   3 -28  13 1677.84 707.372   2
   3 -28  13 2717.01 794.156   3
   3 -28  14 147.040 656.854   2
   3 -28  14 931.952 691.547   3
   3 -28  15 401.380 639.547   2
  -3 -29  12 278.450 714.481   3
  -3 -29  11 520.927 838.420   3
  -3 -29  10 7863.02 900.962   3
  -3 -29   9-151.933 775.220   3
  -3 -29   8 3687.08 866.936   3
  -3 -29   7 970.436 675.836   3
  -3 -29   6 1430.97 815.063   3
  -3 -29   5 208.476 753.551   3
  -3 -29   4 4805.58 752.867   3
  -3 -29   3 382.669 778.034   3
  -3 -29   2 4445.44 872.810   3
  -3 -29   1 545.542 685.326   3
  -3 -29   0 11142.0 904.280   3
  -3 -29  -1 958.312 730.459   3
   3 -29   2 1998.86 591.175   3
  -3 -29  -2 2819.80 838.041   3
  -3 -29  -3 1478.20 799.263   3
   3 -29   3 1256.84 597.065   3
   3 -29   3 1980.31 650.494   2
   3 -29   4 7819.51 740.694   2
  -3 -29  -4 7939.33 933.728   3
   3 -29   4 6409.79 710.400   3
   3 -29   5-26.1112 563.605   3
   3 -29   5 293.303 545.077   2
  -3 -29  -5-386.003 721.422   3
   3 -29   6 3640.80 658.328   3
   3 -29   6 3539.36 660.363   2
  -3 -29  -6 4162.16 778.599   3
   3 -29   7 1115.04 625.363   3
   3 -29   7 1202.65 619.653   2
   3 -29   8 729.625 670.146   3
   3 -29   8 761.323 585.522   2
   3 -29   9 952.713 691.496   3
   3 -29   9 1241.03 617.270   2
   3 -29  10 5989.12 766.436   3
   3 -29  10 5228.80 707.243   2
   3 -29  11-61.2410 654.232   3
   3 -29  11 603.750 585.453   2
   3 -29  12 635.718 744.568   3
   3 -29  12 851.565 682.600   2
   3 -29  13 425.831 727.994   3
   3 -29  14 3846.57 775.726   3
  -3 -30  11 5483.78 820.958   3
  -3 -30  10 1316.12 855.255   3
  -3 -30   9 336.647 814.638   3
  -3 -30   8 2786.75 749.580   3
  -3 -30   7-522.157 795.124   3
  -3 -30   6 3730.93 886.431   3
  -3 -30   5 1282.59 746.101   3
  -3 -30   4 2185.06 726.852   3
  -3 -30   3 452.923 804.720   3
  -3 -30   2 4387.55 886.441   3
  -3 -30   1-92.6458 765.597   3
  -3 -30   0 433.729 722.771   3
  -3 -30  -1 2496.46 731.867   3
  -3 -30  -2 11787.6 938.197   3
  -3 -30  -3 1480.63 718.096   3
   3 -30   4 132.879 589.948   3
   3 -30   4 413.372 636.914   2
  -3 -30  -4 323.418 766.034   3
   3 -30   5 917.223 616.479   3
   3 -30   5 971.661 601.396   2
  -3 -30  -5 869.995 820.118   3
   3 -30   6 4504.10 713.314   3
   3 -30   6 3937.70 692.154   2
  -3 -30  -6 4374.87 908.176   3
   3 -30   7 6559.09 753.965   3
  -3 -30  -7 7230.65 876.898   3
   3 -30   7 6353.09 751.096   2
   3 -30   8 6410.79 771.441   3
   3 -30   9 691.775 705.817   3
   3 -30  10 1054.35 693.767   3
   3 -30  11 2385.51 694.812   3
   3 -30  12 4278.88 814.997   3
   3 -30  13 1793.11 770.872   3
  -3 -31   9 4057.27 786.126   3
  -3 -31   8 2544.70 850.748   3
  -3 -31   7 2017.63 873.809   3
  -3 -31   6-127.574 784.777   3
  -3 -31   5 2150.00 744.401   3
  -3 -31   4 387.652 740.670   3
  -3 -31   3 8.93986 812.487   3
  -3 -31   2 1568.01 834.617   3
  -3 -31   1 1290.64 856.437   3
  -3 -31   0 300.737 799.323   3
  -3 -31  -1 2129.53 827.643   3
  -3 -31  -2 1199.09 829.818   3
  -3 -31  -3 2018.78 851.350   3
  -3 -31  -4 4754.39 899.139   3
   3 -31   5 3295.47 660.212   3
  -3 -31  -5 2580.38 773.245   3
   3 -31   6 2366.94 671.352   3
  -3 -31  -6 1432.03 794.692   3
   3 -31   7-81.8493 637.448   3
  -3 -31  -7 487.074 822.733   3
   3 -31   8 667.046 649.915   3
  -3 -31  -8 1224.46 724.956   3
   3 -31   9 4400.50 773.903   3
   3 -31  10 1385.71 720.120   3
   3 -31  11 1248.10 690.545   3
  -3 -32   6 579.662 715.775   3
  -3 -32   5-11.9781 739.639   3
  -3 -32   4 101.177 774.584   3
  -3 -32   3 4482.61 899.018   3
  -3 -32   2 676.410 825.698   3
  -3 -32   1 6588.39 963.205   3
  -3 -32   0 1612.36 867.251   3
  -3 -32  -1 3537.61 891.290   3
  -3 -32  -2 873.165 810.759   3
  -3 -32  -3 1356.81 727.525   3
  -3 -32  -4 47.2447 725.322   3
  -3 -32  -5 2673.66 901.530   3
  -3 -32  -6 1676.51 806.851   3
   3 -32   7 5363.70 794.708   3
  -3 -32  -7 5697.78 897.754   3
   3 -32   8 1594.27 701.299   3
  -3 -32  -8 1803.45 820.250   3
   3 -32   9 614.822 664.862   3
   3 -32  10 406.162 694.122   3
  -3 -33   3 954.226 829.110   3
  -3 -33   2 72.6094 798.934   3
  -3 -33   1 5960.26 936.812   3
  -3 -33   0 2750.76 817.845   3
  -3 -33  -1 3481.47 777.347   3
  -3 -33  -2 1753.08 726.019   3
  -3 -33  -3 936.380 829.395   3
  -3 -33  -4 424.710 867.673   3
   3 -33   9 1053.56 686.520   3
  -4   0  25 471.184 745.546   0
  -4   0  24 921.684 849.789   0
  -4   0  23 296.086 760.699   0
  -4   0  22 780.115 694.057   0
  -4   0  21 374.453 726.509   0
  -4   0  21 299.457 477.921   3
  -4   0  20 6550.98 862.811   0
  -4   0  20 6790.09 568.297   3
  -4   0  19 600.230 788.202   0
  -4   0  19 373.832 424.929   3
  -4   0  18 2583.73 796.217   0
  -4   0  18 1470.31 425.828   3
  -4   0  17 319.202 390.536   3
  -4   0  17-359.245 758.147   0
  -4   0  16 3657.77 412.086   3
  -4   0  16 4006.39 785.334   0
  -4   0  15 231.998 358.695   3
  -4   0  15-953.841 732.447   0
  -4   0  14 1206.67 343.721   3
   4   0 -14 963.515 464.623   1
  -4   0  14 591.866 666.655   0
  -4   0  13 32.1148 307.974   3
   4   0 -13-188.610 448.674   1
  -4   0  13-748.174 584.526   0
  -4   0  12 9852.63 428.546   3
   4   0 -12 9633.46 582.833   1
  -4   0  12 10357.3 778.067   0
  -4   0  11-242.664 623.090   0
  -4   0  11 24.5221 267.983   3
   4   0 -11-214.013 458.297   1
  -4   0  10 657.930 556.059   0
   4   0 -10 638.369 458.609   1
  -4   0  10 599.820 254.020   3
  -4   0   9 72.1173 225.921   3
  -4   0   9-296.509 549.219   0
   4   0  -9-20.0805 457.379   1
  -4   0   8 111242. 1391.04   0
   4   0  -8 111206. 1294.68   1
  -4   0   8 112041. 868.904   3
  -4   0   7-514.275 500.713   0
   4   0  -7-103.483 446.197   1
  -4   0   7 130.631 194.476   3
   4   0  -6 38862.5 820.061   1
  -4   0   6 41787.5 866.853   0
  -4   0   6 40948.8 500.571   3
  -4   0   5-18.2326 385.001   0
   4   0  -5-157.062 409.524   1
  -4   0   5 34.8235 174.333   3
  -4   0   4 1216.82 407.404   0
   4   0  -4 1185.89 432.237   1
  -4   0   4 1668.43 197.804   3
   4   0  -3-206.529 414.802   1
  -4   0   3-33.1879 176.302   3
  -4   0   3-242.771 374.988   0
  -4   0   2 266333. 1570.81   0
   4   0  -2 268677. 1663.64   2
  -4   0   2 273625. 1278.42   3
   4   0  -2 267393. 1822.96   1
   4   0  -1 27.8092 430.290   1
  -4   0   1 11.0505 296.280   0
   4   0  -1-276.305 356.605   2
  -4   0   1-35.0665 191.852   3
  -4   0   0 87540.1 823.138   0
   4   0   0 86974.5 980.526   2
  -4   0   0 87679.9 816.620   3
   4   0   0 88001.7 1076.09   1
   4   0   1 62.1442 335.698   2
   4   0   1-25.1274 381.688   1
  -4   0  -1 149.184 222.600   0
   4   0   2 3978.33 358.742   3
   4   0   2 3418.44 428.382   1
   4   0   2 3466.40 409.898   2
   4   0   3-41.5551 401.988   1
   4   0   3-107.391 340.724   3
   4   0   4 352122. 1997.53   3
   4   0   4 352571. 1946.96   1
   4   0   5-117.454 368.963   1
   4   0   5 299.202 387.842   3
   4   0   6 22909.5 686.166   3
   4   0   6 21612.7 569.259   1
   4   0   7-91.4890 338.394   1
   4   0   7 33.3107 433.952   3
   4   0   8 59082.3 1034.62   3
   4   0   8 59176.1 814.441   1
   4   0   9 5.70274 456.096   3
   4   0   9-69.7818 287.432   1
   4   0  10 7407.46 631.236   3
   4   0  10 6519.94 382.343   1
   4   0  11-93.8616 277.015   1
   4   0  11 216.042 516.585   3
   4   0  12 24296.8 885.891   3
   4   0  12 22881.1 489.631   1
   4   0  13 296.025 549.295   3
   4   0  14 995.301 585.081   3
   4   0  15 212.450 611.602   3
   4   0  16 9957.05 808.022   3
   4   0  17-263.602 582.779   3
   4   0  18 23223.7 1026.19   3
   4   0  19 230.215 656.188   3
   4   0  20 1790.82 735.877   3
   4   0  21 165.926 633.694   3
   4   0  22 23850.3 1199.12   3
   4   0  23 516.885 832.022   3
   4   0  24 1576.61 811.831   3
  -4   1  25-265.095 706.309   0
  -4  -1  25 889.490 848.044   0
  -4  -1  24 3091.77 862.772   0
  -4   1  24 3284.82 893.726   0
  -4  -1  23 1951.12 748.268   0
  -4   1  23 1675.40 843.115   0
  -4   1  22 8545.13 870.413   0
  -4  -1  22 9440.19 863.443   0
  -4   1  21 1700.76 766.279   0
  -4  -1  21 2069.47 518.514   3
  -4  -1  21 1800.02 751.407   0
  -4   1  20 220.225 768.882   0
  -4  -1  20 154.733 454.605   3
  -4   1  20 282.198 439.072   3
  -4  -1  20 562.205 712.541   0
  -4  -1  19 5304.93 830.075   0
  -4  -1  19 5321.93 529.878   3
  -4   1  19 4760.08 498.304   3
  -4   1  19 4742.57 852.402   0
  -4   1  18 11042.4 908.793   0
  -4  -1  18 11707.2 618.621   3
  -4   1  18 11703.7 593.135   3
  -4  -1  18 10934.6 893.090   0
  -4  -1  17-290.633 689.396   0
  -4   1  17-148.300 680.936   0
  -4  -1  17 294.709 401.875   3
  -4   1  17 293.792 383.469   3
  -4  -1  16 82.8237 587.466   0
  -4  -1  16-56.4679 396.728   3
  -4   1  16 503.357 631.885   0
  -4   1  16 149.079 355.963   3
  -4  -1  15 767.098 392.065   3
  -4  -1  15 620.959 638.049   0
  -4   1  15 766.375 329.409   3
   4   1 -15 658.607 458.220   1
  -4   1  15 1072.96 636.532   0
  -4   1  14 3197.70 670.860   0
  -4  -1  14 3652.04 413.248   3
  -4   1  14 3690.84 381.368   3
  -4  -1  14 3483.30 744.760   0
   4   1 -14 3410.88 488.161   1
  -4  -1  13 23296.7 612.807   3
  -4  -1  13 23962.9 955.264   0
  -4   1  13 22502.9 558.189   3
  -4   1  13 22462.4 947.387   0
   4   1 -13 20513.7 722.785   1
   4  -1 -13 21329.1 729.639   1
  -4   1  12 2624.08 303.147   3
  -4  -1  12 2146.06 354.845   3
   4   1 -12 1783.94 470.808   1
  -4   1  12 1684.79 688.513   0
  -4  -1  12 1697.23 641.598   0
   4  -1 -12 2482.93 483.470   1
  -4   1  11 615.246 259.496   3
  -4  -1  11 690.572 303.623   3
   4   1 -11 287.229 442.959   1
   4  -1 -11 549.372 456.922   1
  -4  -1  11 209.140 609.068   0
  -4   1  11-15.6300 635.511   0
  -4  -1  10 37893.1 636.171   3
  -4  -1  10 37384.4 995.303   0
  -4   1  10 38782.1 960.208   0
   4  -1 -10 37710.5 851.757   1
   4   1 -10 38196.9 852.730   1
  -4   1  10 37381.9 562.072   3
   4  -1  -9 8583.52 553.689   1
  -4   1   9 8888.65 314.373   3
  -4  -1   9 8322.65 650.048   0
   4   1  -9 8039.24 544.916   1
  -4   1   9 8334.04 680.180   0
  -4  -1   9 8616.42 367.678   3
  -4   1   8 21561.1 393.405   3
   4  -1  -8 21778.6 701.478   1
  -4  -1   8 22360.3 765.105   0
  -4   1   8 20523.9 725.528   0
   4   1  -8 22249.7 705.698   1
  -4  -1   8 21418.8 459.895   3
   4   1  -7 7536.56 537.845   1
  -4  -1   7 7796.31 592.414   0
  -4   1   7 7159.79 589.807   0
  -4   1   7 7658.86 254.502   3
   4  -1  -7 7556.66 544.438   1
  -4  -1   7 7631.30 319.112   3
  -4  -1   6 40962.9 854.789   0
  -4   1   6 41105.5 862.025   0
   4   1  -6 39533.6 827.165   1
  -4  -1   6 41401.5 553.679   3
   4  -1  -6 42091.5 852.493   1
  -4   1   6 41078.5 447.757   3
  -4  -1   5 5012.18 489.672   0
   4   1  -5 5564.71 479.521   1
  -4   1   5 5047.61 495.097   0
  -4  -1   5 5117.98 262.905   3
  -4   1   5 5625.36 207.183   3
   4  -1  -5 5054.62 484.951   1
   4  -1  -4 42435.7 841.644   1
  -4  -1   4 41805.9 777.266   0
  -4   1   4 41402.5 763.063   0
  -4  -1   4 41222.9 536.061   3
  -4   1   4 41853.5 436.213   3
   4   1  -4 42627.3 851.975   1
  -4   1   4 42383.0 452.378   3
  -4  -1   3 55341.4 814.076   0
   4  -1  -3 55859.3 922.384   1
  -4   1   3 56610.7 826.113   0
  -4   1   3 57587.3 535.605   3
   4  -1  -3 56058.3 875.362   2
   4   1  -3 57229.9 949.522   1
  -4  -1   2 6083.08 428.173   0
  -4  -1   2 6485.17 294.655   3
   4  -1  -2 6508.46 464.158   2
  -4   1   2 6035.90 421.101   0
   4   1  -2 6474.22 412.855   2
   4   1  -2 6552.89 531.331   1
  -4   1   2 6731.28 248.703   3
   4  -1  -2 6489.37 535.966   1
   4  -1  -1 9245.87 471.587   2
   4   1  -1 9312.22 435.725   2
  -4   1   1 9724.42 403.441   0
  -4   1   1 9663.81 294.401   3
  -4  -1   1 9110.63 338.086   3
   4   1  -1 9791.67 529.101   1
   4  -1  -1 9193.95 514.248   1
  -4  -1   1 9723.81 400.722   0
   4  -1   0 181505. 1413.46   2
   4   1   0 182222. 1324.77   2
  -4   1   0 183686. 1151.70   0
  -4   1   0 185612. 1111.37   3
   4   1   0 187558. 1529.86   1
   4  -1   0 187127. 1504.31   1
  -4  -1   0 181397. 1154.15   0
  -4   1  -1 13774.5 362.658   0
   4   1   1 14490.7 573.638   1
   4  -1   1 13436.2 540.061   1
   4   1   1 14001.4 479.370   2
   4  -1   1 14020.2 532.816   2
   4   1   2 13815.4 561.698   1
   4  -1   2 13458.8 516.132   2
   4  -1   2 13704.4 442.448   3
   4  -1   2 13490.9 538.850   1
  -4   1  -2 14198.7 318.380   0
   4  -1   3 99938.4 1028.51   3
   4   1   3 100143. 1117.99   1
   4  -1   3 99106.7 1104.00   1
   4   1   3 98671.7 1070.36   3
   4   1   4 14054.1 539.448   3
   4  -1   4 12974.2 512.219   3
   4   1   4 13221.9 537.616   1
   4  -1   4 13132.9 522.605   1
   4   1   5 93389.1 1057.87   1
   4  -1   5 92500.4 1100.63   3
   4   1   5 93456.8 1139.24   3
   4  -1   5 92004.4 1031.07   1
   4  -1   6 52299.3 898.257   3
   4   1   6 51489.5 913.342   3
   4   1   6 52508.8 807.233   1
   4  -1   6 51454.9 790.815   1
   4   1   7 1053.38 345.096   1
   4   1   7 1218.67 433.875   3
   4  -1   7 758.636 326.765   1
   4  -1   7 1030.97 436.377   3
   4   1   8 195.101 309.037   1
   4  -1   8 18.1121 310.911   1
   4   1   8 141.741 475.464   3
   4  -1   8 193.807 432.218   3
   4   1   9 302.782 316.224   1
   4  -1   9 568.198 304.075   1
   4  -1   9 738.350 472.042   3
   4   1   9 335.510 473.397   3
   4  -1  10 48006.2 1046.35   3
   4   1  10 47086.2 1041.80   3
   4   1  10 45717.7 709.161   1
   4  -1  10 45869.4 696.163   1
   4   1  11 33412.6 598.547   1
   4  -1  11 35024.8 941.255   3
   4   1  11 35740.3 979.802   3
   4   1  12 382.206 519.751   3
   4   1  12 138.871 250.115   1
   4  -1  12 15.6351 513.000   3
   4   1  13 567.844 238.422   1
   4  -1  13 727.142 529.563   3
   4   1  13 759.043 603.026   3
   4  -1  14 24494.8 922.630   3
   4   1  14 24969.1 958.228   3
   4  -1  15 7529.79 713.524   3
   4   1  15 9149.48 775.517   3
   4  -1  16 20169.8 966.531   3
   4   1  16 19555.0 945.717   3
   4   1  17 1432.01 637.592   3
   4  -1  17 1484.77 594.463   3
   4  -1  18 4203.50 760.224   3
   4   1  18 4483.04 724.200   3
   4   1  19 182.615 690.412   3
   4  -1  19 327.420 598.944   3
   4  -1  20 6772.42 851.497   3
   4   1  20 7686.34 783.046   3
   4  -1  21 370.035 739.802   3
   4   1  21 303.129 744.809   3
   4  -1  22 1055.20 685.406   3
   4   1  22 1525.59 815.035   3
   4  -1  23 1336.01 742.015   3
   4   1  23 2227.84 719.167   3
   4  -1  24 4096.59 875.307   3
   4   1  24 5761.05 892.448   3
  -4  -2  25 3119.37 895.262   0
  -4   2  25 2704.52 885.780   0
  -4   2  24 4460.16 804.586   0
  -4  -2  24 4806.52 869.025   0
  -4   2  23 243.488 837.251   0
  -4  -2  23 894.370 679.678   0
  -4   2  22 587.410 768.429   0
  -4  -2  22 944.370 537.713   3
  -4  -2  22 1034.09 689.734   0
  -4   2  21 8902.86 879.406   0
  -4  -2  21 8870.27 670.641   3
  -4  -2  21 9403.23 873.933   0
  -4  -2  20-75.0159 469.623   3
  -4   2  20 344.575 776.110   0
  -4  -2  20 1042.18 685.619   0
  -4  -2  19 638.483 454.359   3
  -4   2  19 622.522 394.337   3
  -4   2  19 492.881 770.298   0
  -4  -2  19 621.515 656.540   0
  -4  -2  18 641.081 453.822   3
  -4   2  18 342.578 383.272   3
  -4   2  18 573.372 655.498   0
  -4  -2  18 532.543 614.124   0
  -4  -2  17 7909.11 562.217   3
  -4   2  17 9770.65 805.976   0
  -4   2  17 9019.80 522.290   3
  -4  -2  17 8682.16 802.553   0
  -4  -2  16 3924.66 763.354   0
  -4  -2  16 3595.97 460.797   3
  -4   2  16 3565.63 744.605   0
  -4   2  16 3151.83 409.001   3
   4   2 -16 3560.69 492.173   1
  -4  -2  15 41741.1 1205.38   0
  -4   2  15 39728.5 768.833   3
  -4   2  15 41845.7 1220.30   0
  -4  -2  15 42182.4 866.988   3
   4   2 -15 40485.7 910.353   1
  -4  -2  14 3392.03 426.007   3
  -4  -2  14 2895.82 636.629   0
  -4   2  14 3094.61 362.478   3
   4   2 -14 2785.31 495.976   1
  -4   2  14 3177.49 745.632   0
  -4  -2  13 3780.31 416.867   3
  -4  -2  13 3354.27 749.223   0
  -4   2  13 3564.64 341.292   3
   4   2 -13 2772.49 493.552   1
  -4   2  13 2980.76 741.628   0
  -4  -2  12 985.958 350.125   3
  -4  -2  12 983.040 605.308   0
   4   2 -12 805.751 472.582   1
  -4   2  12 275.894 673.536   0
  -4   2  12 961.494 268.852   3
  -4  -2  11 17154.0 512.520   3
  -4  -2  11 17805.6 805.513   0
  -4   2  11 16924.4 421.901   3
   4  -2 -11 16250.3 659.519   1
  -4   2  11 17347.0 837.584   0
   4   2 -11 16338.7 646.500   1
  -4  -2  10 152.180 293.886   3
   4  -2 -10 85.8497 195.771   3
   4   2 -10-77.4254 451.098   1
  -4   2  10 273.034 212.839   3
  -4  -2  10 438.716 598.298   0
  -4   2  10-95.2376 546.159   0
   4  -2 -10 180.239 451.334   1
  -4  -2   9 28897.4 887.548   0
   4  -2  -9 27836.0 778.113   1
  -4   2   9 29409.8 441.481   3
  -4   2   9 28777.0 841.319   0
  -4  -2   9 29568.9 582.167   3
   4   2  -9 28489.8 771.368   1
  -4   2   8 22717.1 357.728   3
  -4   2   8 21991.4 799.443   0
   4   2  -8 23398.6 721.447   1
  -4  -2   8 21529.4 765.408   0
  -4  -2   8 21990.8 500.113   3
   4  -2  -8 22540.2 711.543   1
  -4   2   7 44449.1 433.828   3
   4   2  -7 43710.9 869.407   1
  -4  -2   7 45422.3 918.525   0
  -4  -2   7 43963.8 620.564   3
   4  -2  -7 45665.4 904.755   1
  -4  -2   6 44373.5 875.644   0
   4   2  -6 47160.1 897.059   1
  -4  -2   6 45830.8 616.465   3
   4  -2  -6 44340.7 877.417   1
  -4   2   6 45657.0 401.969   3
  -4  -2   5 36024.3 772.857   0
  -4  -2   5 36759.3 557.034   3
   4   2  -5 37110.8 803.696   1
  -4   2   5 36660.2 346.990   3
   4  -2  -5 36221.9 796.428   1
  -4   2   4 10964.6 214.878   3
  -4  -2   4 11455.5 362.321   3
   4   2  -4 11217.1 589.028   1
   4  -2  -4 10588.0 573.847   1
  -4   2   4 11332.1 215.370   3
  -4  -2   4 10507.7 494.678   0
   4  -2  -3 29930.0 722.397   2
  -4   2   3 30642.9 352.591   3
   4   2  -3 30188.6 766.427   1
   4  -2  -3 30664.0 764.123   1
  -4  -2   3 29119.2 650.304   0
   4  -2  -2 199080. 1515.15   2
   4   2  -2 200976. 1353.32   2
  -4   2   2 204250. 935.744   3
   4  -2  -2 200678. 1616.22   1
  -4  -2   2 195838. 1378.12   0
   4  -2  -1 69287.3 948.084   2
  -4   2   1 71347.6 621.722   3
  -4   2   1 71240.7 795.986   0
   4  -2  -1 71768.0 1010.51   1
   4   2  -1 70515.8 832.688   2
  -4  -2   1 69404.2 802.629   0
   4  -2   0 53815.6 838.083   2
   4   2   0 52261.3 735.382   2
  -4   2   0 54408.2 595.020   3
  -4   2   0 52749.8 664.581   0
   4  -2   0 52608.7 888.353   1
   4   2   1 1037.98 323.261   2
   4  -2   1 746.168 391.385   2
   4  -2   1 949.038 427.888   1
  -4   2  -1 942.694 243.852   0
  -4   2  -1 743.353 212.394   3
   4  -2   1 783.467 252.233   3
   4  -2   2 1725.53 391.898   2
  -4   2  -2 1713.90 213.434   0
   4  -2   2 1688.01 400.125   1
   4  -2   2 1794.45 290.017   3
   4  -2   3 84376.3 933.045   3
   4  -2   3 83651.0 1032.30   1
  -4   2  -3 84970.8 577.426   0
   4  -2   4 5794.66 410.683   3
   4   2   4 5592.57 465.783   3
   4  -2   4 5607.40 444.718   1
   4  -2   5 7390.34 476.775   3
   4   2   5 7083.96 464.908   1
   4   2   5 6994.27 503.361   3
   4  -2   5 6845.77 455.100   1
   4  -2   6 621.771 400.438   3
   4  -2   6 506.977 359.002   1
   4   2   6 573.605 360.847   1
   4   2   6 875.474 427.830   3
   4  -2   7 119542. 1125.32   1
   4   2   7 119571. 1159.83   1
   4  -2   7 120253. 1329.95   3
   4   2   7 118739. 1391.97   3
   4   2   8 31849.0 847.554   3
   4  -2   8 30267.2 785.450   3
   4   2   8 31359.0 650.658   1
   4  -2   8 31537.4 628.556   1
   4   2   9 117305. 1110.79   1
   4  -2   9 117531. 1439.82   3
   4   2   9 116817. 1478.72   3
   4  -2   9 118792. 1073.65   1
   4   2  10 10432.4 436.448   1
   4  -2  10 11355.8 633.465   3
   4   2  10 11668.2 695.141   3
   4  -2  11 35674.1 964.367   3
   4   2  11 35295.7 965.427   3
   4   2  11 35015.5 618.785   1
   4  -2  12 7901.73 677.523   3
   4   2  12 8763.95 710.434   3
   4   2  12 7778.98 365.368   1
   4  -2  13 24573.6 914.409   3
   4   2  13 23325.9 891.358   3
   4   2  13 23633.3 481.161   1
   4  -2  14 200.322 561.512   3
   4   2  14 63.5400 600.099   3
   4  -2  15 7990.47 704.429   3
   4   2  15 8212.96 759.192   3
   4   2  16 1986.96 676.870   3
   4  -2  16 1735.70 680.184   3
   4  -2  17 15617.2 871.061   3
   4   2  17 15893.1 883.926   3
   4  -2  18 9246.86 848.558   3
   4   2  18 8548.14 766.785   3
   4  -2  19 2367.90 716.798   3
   4   2  19 2163.66 741.694   3
   4   2  20 879.271 651.907   3
   4  -2  20 493.829 610.004   3
   4  -2  21 1791.40 773.185   3
   4   2  21 2930.23 829.180   3
   4   2  22 3661.37 752.832   3
   4  -2  22 3639.23 856.717   3
   4  -2  23 3948.32 879.287   3
   4   2  23 3796.69 865.806   3
   4  -2  24 920.644 799.042   3
   4   2  24 1257.10 838.992   3
  -4   3  25 1322.42 860.622   0
  -4   3  24 2032.88 836.874   0
  -4   3  23 3852.41 859.460   0
  -4  -3  23 3731.34 750.646   0
  -4  -3  22 773.274 539.286   3
  -4   3  22 144.732 824.558   0
  -4  -3  22 638.047 667.866   0
  -4  -3  21 557.431 515.736   3
  -4   3  21 108.729 673.542   0
  -4  -3  21 396.160 664.506   0
  -4   3  20 439.843 787.213   0
  -4  -3  20 165.782 498.796   3
  -4  -3  20-81.6156 612.490   0
  -4  -3  19 13209.1 689.833   3
  -4   3  19 13518.1 977.794   0
  -4   3  19 13111.8 589.250   3
  -4  -3  19 12130.0 878.703   0
  -4   3  18 151.682 619.813   0
  -4  -3  18 46.7454 452.950   3
  -4   3  18 61.3232 374.779   3
  -4  -3  18 649.645 722.506   0
  -4  -3  17 7684.25 591.189   3
  -4   3  17 8180.87 863.106   0
  -4   3  17 8333.60 491.588   3
  -4  -3  17 8493.77 875.006   0
   4   3 -17 8822.26 574.339   1
  -4  -3  16 364.601 429.708   3
  -4   3  16 247.498 346.709   3
   4   3 -16 218.628 410.986   1
  -4   3  16-94.8439 751.293   0
  -4  -3  16 677.187 623.597   0
  -4  -3  15 24319.6 739.215   3
  -4   3  15 24351.2 618.208   3
  -4   3  15 25923.1 1050.56   0
   4   3 -15 23482.8 744.399   1
  -4  -3  15 24730.5 1019.83   0
  -4  -3  14 37.3709 391.788   3
   4   3 -14 97.8123 445.334   1
  -4   3  14-70.6634 290.652   3
  -4   3  14-24.4768 612.133   0
  -4  -3  14 349.016 658.891   0
  -4  -3  13 43937.0 845.527   3
  -4   3  13 43524.7 686.561   3
  -4   3  13 42836.1 1114.29   0
   4   3 -13 42090.7 920.886   1
  -4  -3  13 44949.8 1178.61   0
  -4  -3  12 9661.59 486.179   3
  -4   3  12 9665.05 370.588   3
  -4   3  12 8908.32 716.035   0
   4   3 -12 9165.34 576.448   1
  -4  -3  12 9592.64 705.459   0
  -4  -3  11 2085.53 557.259   0
   4   3 -11 2370.57 495.212   1
  -4   3  11 2351.97 257.394   3
  -4  -3  11 2424.70 378.671   3
  -4   3  10 4653.77 241.198   3
   4  -3 -10 4432.02 241.175   3
   4   3 -10 4603.25 512.580   1
  -4  -3  10 4608.16 378.544   3
  -4  -3  10 4907.49 582.485   0
  -4   3   9 27831.5 388.111   3
   4   3  -9 27155.0 749.162   1
  -4  -3   9 26924.3 819.638   0
  -4  -3   9 26258.3 574.658   3
   4  -3  -9 27247.6 766.303   1
   4   3  -8 576.807 447.322   1
  -4   3   8 505.001 128.409   3
   4  -3  -8 507.425 449.582   1
  -4  -3   8 456.816 288.737   3
  -4  -3   8 673.102 559.682   0
  -4   3   7 5767.54 154.241   3
   4  -3  -7 5326.57 534.440   1
   4   3  -7 5358.40 519.731   1
  -4  -3   7 5547.32 343.193   3
  -4  -3   7 5408.71 518.187   0
  -4   3   6 657.968 73.1518   3
  -4  -3   6 700.645 432.751   0
   4  -3  -6 480.670 462.064   1
  -4  -3   6 690.543 256.321   3
   4   3  -6 492.901 468.334   1
  -4  -3   5 43206.3 634.183   3
   4  -3  -5 44241.3 869.451   1
  -4  -3   5 43164.4 827.264   0
  -4   3   4 16551.7 187.721   3
  -4  -3   4 17609.5 440.475   3
  -4   3   4 16299.2 184.914   3
  -4  -3   4 17774.9 583.295   0
   4  -3  -4 16730.7 649.598   1
  -4   3   3 30502.9 293.468   3
   4  -3  -3 30536.7 721.274   2
  -4  -3   3 31050.4 670.773   0
   4  -3  -3 30960.8 747.426   1
  -4   3   2 7131.59 192.383   3
   4  -3  -2 6803.25 489.023   2
   4   3  -2 6992.09 374.100   2
   4  -3  -2 6440.25 532.787   1
  -4   3   1 209.192 149.939   3
   4  -3  -1 374.397 418.609   2
   4   3  -1 179.130 266.218   2
   4  -3  -1 45.4663 402.516   1
   4  -3   0 888.472 417.787   2
   4   3   0 846.293 285.570   2
  -4   3   0 732.376 179.829   3
   4  -3   0 605.505 428.198   1
   4  -3   0 935.239 208.639   3
   4  -3   1 250809. 1744.54   2
  -4   3  -1 249452. 1280.81   3
   4   3   1 238856. 1301.98   0
   4  -3   1 250229. 1324.24   3
   4  -3   1 247591. 1717.25   1
   4   3   1 246399. 1448.60   2
   4  -3   2 12590.3 565.208   2
   4   3   2 10837.6 326.962   0
   4  -3   2 12031.0 397.504   3
   4  -3   2 12971.5 546.295   1
   4   3   3 18246.5 366.062   0
  -4   3  -3 18919.6 327.874   0
   4  -3   3 20053.6 521.410   3
   4  -3   3 18673.3 610.422   1
  -4   3  -4 2769.68 145.099   0
   4   3   4 3020.97 198.104   0
   4  -3   4 2609.27 369.387   3
   4  -3   4 3144.50 416.641   1
   4   3   4 2756.03 421.831   3
   4   3   5 208095. 856.167   0
   4   3   5 211014. 1716.86   3
   4  -3   5 206587. 1549.72   3
   4  -3   5 206570. 1508.70   1
   4  -3   6 393.782 364.781   3
   4  -3   6-19.9416 343.487   1
   4   3   6 65.1934 440.661   3
   4   3   6 107.969 90.5021   0
   4  -3   7 38128.7 815.689   3
   4   3   7 38012.3 883.428   3
   4  -3   7 39518.3 703.168   1
   4  -3   8 614.753 418.070   3
   4   3   8 759.333 502.977   3
   4  -3   9 59786.6 1081.39   3
   4   3   9 59575.2 846.604   1
   4   3   9 59813.4 1140.53   3
   4  -3  10 5134.20 564.020   3
   4   3  10 4542.19 378.165   1
   4   3  10 4258.86 618.528   3
   4   3  11 14730.4 776.746   3
   4   3  11 14432.9 471.536   1
   4  -3  11 13740.8 688.394   3
   4   3  12 695.434 283.638   1
   4  -3  12 808.227 519.629   3
   4   3  12 654.484 535.832   3
   4   3  13 523.341 269.540   1
   4  -3  13 698.049 607.732   3
   4   3  13 626.364 621.137   3
   4  -3  14 5076.90 680.221   3
   4   3  14 4659.61 644.637   3
   4  -3  15 29876.3 1004.47   3
   4   3  15 30840.7 1037.61   3
   4  -3  16 351.547 652.072   3
   4   3  16 368.064 606.895   3
   4  -3  17 5754.08 729.505   3
   4   3  17 5924.91 706.279   3
   4  -3  18 495.840 622.501   3
   4   3  18 415.722 581.150   3
   4  -3  19 6664.82 831.430   3
   4   3  19 7291.95 844.280   3
   4  -3  20 400.805 717.597   3
   4   3  20 867.037 720.272   3
   4  -3  21 2857.37 708.334   3
   4   3  21 3610.78 785.799   3
   4  -3  22 47.8604 667.293   3
   4   3  22 19.9481 765.826   3
   4  -3  23 1012.39 707.388   3
   4   3  23 1426.82 817.457   3
   4  -3  24 512.295 743.080   3
   4   3  24-33.7267 671.180   3
  -4   4  25 104.064 711.170   0
  -4   4  24 1589.28 909.483   0
  -4  -4  23 534.742 576.094   3
  -4   4  23-226.402 696.734   0
  -4  -4  22 439.386 527.598   3
  -4   4  22 839.141 870.967   0
  -4   4  21 13323.1 986.601   0
  -4  -4  21 13937.2 761.279   3
  -4  -4  21 13857.1 922.615   0
  -4   4  20 4358.41 851.171   0
  -4  -4  20 5039.43 600.166   3
  -4  -4  20 5535.57 791.858   0
  -4  -4  19 1414.76 515.236   3
  -4   4  19 1494.88 796.785   0
  -4  -4  19 2737.23 804.592   0
  -4  -4  18 698.756 485.140   3
  -4   4  18 525.168 635.430   0
  -4   4  18 948.196 384.322   3
  -4  -4  18 1238.82 743.124   0
   4   4 -18 797.339 437.486   1
  -4  -4  17 30194.0 870.777   3
  -4   4  17 30904.0 1178.30   0
  -4   4  17 29486.0 720.375   3
  -4  -4  17 29895.9 1055.41   0
   4   4 -17 29013.1 790.316   1
  -4  -4  16 260.514 432.335   3
  -4  -4  16 537.708 702.979   0
   4   4 -16 75.6316 412.911   1
  -4   4  16 63.4466 711.326   0
  -4   4  16 213.386 325.231   3
  -4  -4  15 32205.3 842.131   3
  -4   4  15 29954.2 649.546   3
  -4   4  15 32515.2 1075.14   0
   4   4 -15 30450.0 822.702   1
  -4  -4  15 31024.9 1048.34   0
  -4  -4  14 558.249 401.127   3
  -4   4  14 11.1121 700.851   0
   4   4 -14 62.6845 430.607   1
  -4   4  14 424.372 282.441   3
  -4  -4  14 656.973 715.010   0
  -4  -4  13 3237.82 457.753   3
   4   4 -13 2910.32 494.354   1
  -4   4  13 3232.80 308.294   3
  -4  -4  13 3869.71 684.996   0
  -4   4  12 6633.40 322.532   3
   4   4 -12 6836.93 553.327   1
  -4  -4  12 7472.72 667.066   0
  -4  -4  12 7629.92 496.587   3
  -4  -4  11 75551.7 1287.06   0
  -4   4  11 75186.3 708.686   3
   4   4 -11 75916.0 1141.88   1
  -4  -4  11 74724.7 1005.48   3
   4   4 -10 89.6921 462.167   1
  -4   4  10 61.8201 165.201   3
   4  -4 -10 36.8470 158.031   3
  -4  -4  10 540.002 557.792   0
  -4  -4  10 380.984 320.910   3
  -4   4   9 20507.4 306.149   3
   4   4  -9 21079.7 703.211   1
  -4  -4   9 20825.2 558.366   3
  -4  -4   9 20507.1 818.867   0
  -4   4   8 333.897 84.8901   3
   4   4  -8 395.430 453.524   1
  -4  -4   8 480.785 475.471   0
  -4  -4   8 218.186 294.871   3
  -4  -4   7 4456.06 343.341   3
  -4  -4   7 4323.41 536.397   0
   4  -4  -7 4177.20 520.791   1
  -4  -4   6 9303.07 392.212   3
  -4  -4   6 8442.34 540.729   0
   4  -4  -6 9079.05 567.221   1
  -4  -4   5 68917.4 825.622   3
  -4  -4   5 69807.8 1030.24   0
   4  -4  -5 70758.2 1061.45   1
  -4  -4   4 29756.4 585.124   3
   4  -4  -4 29969.1 770.511   1
   4  -4  -3 56877.9 949.388   2
   4  -4  -3 53297.4 925.158   1
  -4   4   2 17443.8 236.556   3
   4  -4  -2 17502.0 627.192   2
   4  -4  -2 17760.0 644.438   1
  -4   4   1 8622.15 224.374   3
   4  -4  -1 8376.27 530.312   2
   4   4  -1 8356.44 352.101   2
   4  -4  -1 8456.68 543.779   1
   4   4   0 6499.69 326.773   2
  -4   4   0 6708.40 243.953   3
   4  -4   0 6325.13 261.694   3
   4  -4   0 6284.78 523.397   1
   4  -4   0 6787.61 505.981   2
  -4   4  -1 19104.7 397.482   3
   4  -4   1 19989.1 630.648   2
   4  -4   1 19684.0 432.412   3
   4   4   1 19044.8 466.818   2
   4  -4   1 19264.4 610.012   1
   4   4   2 24551.2 470.027   0
   4  -4   2 24714.8 496.446   3
   4  -4   2 24234.9 660.377   1
   4  -4   2 25623.5 724.540   2
   4   4   3 404865. 6170.21   0
   4  -4   3 411650. 7601.44   3
   4  -4   3 403683. 2150.93   1
   4   4   4 5975.24 260.896   0
   4  -4   4 6352.03 405.694   3
   4  -4   4 6014.96 453.920   1
  -4   4  -5 14406.4 183.395   0
   4  -4   5 15750.5 543.308   3
   4   4   5 15612.5 627.891   3
   4   4   5 15088.8 317.832   0
   4  -4   5 15362.5 548.188   1
   4  -4   6 1311.79 386.092   3
   4   4   6 1005.99 161.269   0
   4   4   6 1299.44 483.685   3
   4  -4   7 120212. 1319.61   3
   4   4   7 117957. 647.756   0
   4   4   7 121879. 1457.40   3
   4  -4   8 3404.92 472.514   3
   4   4   8 3213.47 538.074   3
   4   4   9 107988. 1482.41   3
   4  -4   9 107326. 1374.13   3
   4  -4  10 6002.63 569.954   3
   4   4  10 5297.83 606.254   3
   4  -4  11 3801.66 556.540   3
   4   4  11 3706.48 588.022   3
   4  -4  12 4823.69 577.853   3
   4   4  12 5709.79 678.492   3
   4   4  12 5139.83 358.983   1
   4   4  13 64160.1 791.855   1
   4  -4  13 66568.5 1310.28   3
   4   4  13 68068.9 1352.11   3
   4  -4  14 7845.70 730.515   3
   4   4  14 7852.58 750.255   3
   4  -4  15 2216.38 610.539   3
   4   4  15 2624.18 617.510   3
   4   4  16 6222.36 688.477   3
   4  -4  16 5934.38 736.392   3
   4  -4  17 7205.86 785.066   3
   4   4  17 7425.88 725.585   3
   4  -4  18 1303.78 608.300   3
   4   4  18 815.759 590.685   3
   4  -4  19 8806.72 806.347   3
   4   4  19 8729.91 846.821   3
   4  -4  20 748.803 730.942   3
   4   4  20 1190.31 764.786   3
   4  -4  21 4028.73 858.186   3
   4   4  21 3897.62 734.169   3
   4  -4  22 956.212 824.931   3
   4   4  22 2170.47 849.251   3
   4  -4  23 3427.46 867.416   3
   4   4  23 3285.00 753.344   3
   4  -4  24 448.750 827.203   3
   4   4  24 442.635 813.684   3
  -4   5  25 276.094 878.858   0
  -4   5  24 2837.01 823.204   0
  -4  -5  23 1709.78 608.423   3
  -4   5  23 1259.95 875.397   0
  -4  -5  22-25.9860 537.100   3
  -4   5  22 240.245 772.020   0
  -4   5  21 500.788 822.668   0
  -4  -5  21 606.808 543.995   3
  -4  -5  20 459.870 509.168   3
  -4   5  20 297.406 702.195   0
  -4  -5  19 3645.24 811.927   0
  -4  -5  19 3593.26 570.092   3
  -4   5  19 3978.50 848.043   0
  -4  -5  18 7231.36 599.084   3
  -4   5  18 6320.15 754.387   0
  -4  -5  18 7078.82 734.903   0
   4   5 -18 7390.66 538.363   1
  -4  -5  17 354.256 455.675   3
   4   5 -17 336.500 416.300   1
  -4  -5  17 994.503 746.091   0
  -4   5  17 628.976 343.243   3
  -4   5  17 228.217 775.706   0
  -4  -5  16 1021.88 475.296   3
   4   5 -16 638.045 455.943   1
  -4   5  16 593.949 645.834   0
  -4  -5  16 521.748 617.154   0
  -4   5  16 718.946 324.433   3
  -4  -5  15 16843.1 687.441   3
  -4   5  15 16285.1 499.862   3
  -4  -5  15 18195.4 957.404   0
   4   5 -15 16857.8 698.745   1
  -4  -5  14 91.0108 421.324   3
   4   5 -14 284.381 449.371   1
  -4  -5  14 611.994 657.453   0
  -4   5  14 371.337 266.495   3
  -4  -5  13 11094.5 566.844   3
  -4   5  13 11238.7 387.988   3
   4   5 -13 10857.4 604.549   1
  -4  -5  13 11542.3 739.649   0
  -4  -5  12 467.139 405.820   3
   4   5 -12 492.811 462.747   1
  -4  -5  12 789.115 561.205   0
  -4   5  12 403.737 224.192   3
  -4   5  11 4107.71 229.040   3
   4   5 -11 3537.10 519.102   1
  -4  -5  11 4549.49 621.873   0
  -4  -5  11 4416.06 437.300   3
   4  -5 -10 47915.2 475.306   3
  -4  -5  10 50007.3 1103.48   0
  -4   5  10 49548.1 479.995   3
   4   5 -10 49607.1 982.077   1
  -4  -5  10 48960.8 849.188   3
  -4  -5   9 5755.38 608.345   0
  -4   5   9 5132.53 153.405   3
  -4  -5   9 5617.45 410.303   3
  -4  -5   8 663.733 563.337   0
  -4  -5   8 814.338 341.460   3
  -4  -5   7 8183.03 634.690   0
  -4  -5   7 8102.85 415.357   3
  -4  -5   6 5807.55 387.752   3
  -4  -5   5 978.806 324.554   3
  -4  -5   4 104368. 1043.16   3
  -4  -5   3 42.3245 203.144   2
   4  -5  -3 254.199 408.918   2
  -4   5   2 83.2369 75.7823   3
   4  -5  -2 104.885 461.988   2
   4  -5  -1 20218.2 659.896   2
   4   5  -1 20886.0 433.369   2
   4  -5  -1 20751.2 308.188   3
   4  -5  -1 21368.8 653.613   1
  -4   5   1 20866.8 297.259   3
  -4   5   0 93347.4 689.901   3
   4  -5   0 93309.9 1153.97   2
   4   5   0 91517.0 823.661   2
   4  -5   0 94972.7 722.672   3
  -4   5  -1 27387.7 449.901   3
   4  -5   1 27188.5 742.563   2
   4  -5   1 27400.5 471.390   3
   4   5   1 27244.5 511.198   2
   4  -5   2 169088. 1158.64   3
   4  -5   2 174887. 1568.87   2
[truncated: 332,870 more chars]
