# Supplementary material for: The Anion Impact on Dimensionality of Cadmium(II) Complexes with Nicotinamide
Source: MDPI journal article supplement (doi:10.3390/chemistry5020092), 2023-06-01
Supplement: s1 [file s1 › supplementary materials.pdf]

## Supplementary Materials

# The anion impact on dimensionality of cadmium(II) complexes with nicotinamide

Željka Soldin <sup>1,\*</sup>, Boris-Marko Kukovec <sup>2,\*</sup>, Milica Kovačić <sup>3</sup>, Marijana Đaković <sup>1</sup> and Zora Popović <sup>1</sup>

<sup>1</sup> Division of General and Inorganic Chemistry, Department of Chemistry, Faculty of Science, University of Zagreb, Horvatovac 102a, HR-10000 Zagreb, Croatia; zeljka.chem@pmf.hr (Ž.S.); mdjakovic@chem.pmf.hr (M.Đ.); zpopovic@chem.pmf.hr (Z.P.)

<sup>2</sup> Department of Physical Chemistry, Faculty of Chemistry and Technology, University of Split, Ruđera Boškovića 35, HR-21000 Split, Croatia; bmkukovec@ktf-split.hr (B.-M.K.)

<sup>3</sup> Institute for Medical Research and Occupational Health, Ksaverska cesta 2, HR-10000 Zagreb, Croatia; mkovacic@imi.hr (M.K.)

\* Correspondence: zeljka.chem@pmf.hr (Ž.S.); bmkukovec@ktf-split.hr (B.-M.K.)

## 1. Crystal structures

**Table S1.** Selected bond lengths (Å) and angles (°) for [Cd(CH<sub>3</sub>COO)<sub>2</sub>(nia)<sub>2</sub>]<sub>2</sub> (**1**), [[Cd(nia)<sub>4</sub>](ClO<sub>4</sub>)<sub>2</sub>]<sub>n</sub> (**2**) and [Cd(H<sub>2</sub>O)<sub>3</sub>(nia)<sub>3</sub>](ClO<sub>4</sub>)<sub>2</sub>·nia (**3**).

| 1            |          | 2                       |          | 3         |          |
|--------------|----------|-------------------------|----------|-----------|----------|
| Bond lengths |          |                         |          |           |          |
| Cd1–N1       | 2.348(3) | Cd1–N1                  | 2.349(2) | Cd1–N1    | 2.336(3) |
| Cd1–N3       | 2.312(3) | Cd1–N3                  | 2.338(2) | Cd1–N3    | 2.321(3) |
| Cd1–O3       | 2.465(3) | Cd1–O1                  | 2.329(2) | Cd1–N5    | 2.316(3) |
| Cd1–O4       | 2.360(4) |                         |          | Cd1–O5    | 2.323(3) |
| Cd1–O5       | 2.277(4) |                         |          | Cd1–O6    | 2.395(4) |
| Cd1–O6       | 2.365(4) |                         |          | Cd1–O7    | 2.301(3) |
| Bond angles  |          |                         |          |           |          |
| O5–Cd1–N3    | 89.8(1)  | O1–Cd1–N3 <sup>ii</sup> | 90.50(7) | O7–Cd1–N5 | 87.8(1)  |
| O5–Cd1–N1    | 90.2(1)  | O1–Cd1–N3               | 89.50(7) | O7–Cd1–N3 | 91.7(1)  |
| N3–Cd1–N1    | 179.0(1) | O1–Cd1–N1               | 95.30(6) | N5–Cd1–N3 | 93.4(1)  |
| O5–Cd1–O4    | 100.3(3) | N3–Cd1–N1               | 98.64(7) | O7–Cd1–O5 | 177.9(1) |
| N3–Cd1–O4    | 95.0(1)  | O1–Cd1–N1 <sup>ii</sup> | 84.70(6) | N5–Cd1–O5 | 92.5(1)  |
| N1–Cd1–O4    | 86.0(1)  | N3–Cd1–N1 <sup>ii</sup> | 81.36(7) | N3–Cd1–O5 | 90.3(1)  |
| O5–Cd1–O6    | 123.9(3) |                         |          | O7–Cd1–N1 | 91.3(1)  |
| N3–Cd1–O6    | 90.3(1)  |                         |          | N5–Cd1–N1 | 171.9(1) |
| N1–Cd1–O6    | 88.9(1)  |                         |          | N3–Cd1–N1 | 94.6(1)  |
| O4–Cd1–O6    | 135.5(1) |                         |          | O5–Cd1–N1 | 88.2(1)  |
| O5–Cd1–O3    | 154.0(3) |                         |          | O7–Cd1–O6 | 87.8(2)  |
| N3–Cd1–O3    | 90.1(1)  |                         |          | N5–Cd1–O6 | 84.6(1)  |
| N1–Cd1–O3    | 90.4(1)  |                         |          | N3–Cd1–O6 | 177.9(1) |
| O4–Cd1–O3    | 53.8(1)  |                         |          | O5–Cd1–O6 | 90.2(2)  |
| O6–Cd1–O3    | 82.1(1)  |                         |          | N1–Cd1–O6 | 87.4(1)  |

Symmetry code (ii)  $-x+1, -y, -z$ .

**Table S2.** The hydrogen bond geometry for [Cd(CH<sub>3</sub>COO)<sub>2</sub>(nia)<sub>2</sub>]<sub>2</sub> (**1**), {[Cd(nia)<sub>4</sub>](ClO<sub>4</sub>)<sub>2</sub>]<sub>n</sub> (**2**) and [Cd(H<sub>2</sub>O)<sub>3</sub>(nia)<sub>3</sub>](ClO<sub>4</sub>)<sub>2</sub>·nia (**3**).

| D–H...A       | <i>d</i> (D–H)/Å | <i>d</i> (H...A)/Å | <i>d</i> (D...A)/<br>Å | ∠(D–H...A)/° | Symmetry code on<br>A                           |
|---------------|------------------|--------------------|------------------------|--------------|-------------------------------------------------|
| <b>1</b>      |                  |                    |                        |              |                                                 |
| N2–H12N...O2  | 0.87             | 1.99               | 2.856(5)               | 170          | <i>x</i> , <i>y</i> +1, <i>z</i>                |
| N4–H14N...O1  | 0.88             | 2.50               | 3.020(5)               | 119          | <i>x</i> , <i>y</i> –1, <i>z</i>                |
| N2–H22N...O4  | 0.86             | 2.45               | 2.879(7)               | 111          | – <i>x</i> –1, 1/2+ <i>y</i> , 1/2– <i>z</i>    |
| N4–H24N...O3  | 0.87             | 2.30               | 3.151(7)               | 169          | – <i>x</i> , –1/2+ <i>y</i> , 1/2– <i>z</i>     |
| C3–H3...O4    | 0.93             | 2.59               | 3.450(5)               | 154          | – <i>x</i> –1, 1/2+ <i>y</i> , 1/2– <i>z</i>    |
| C9–H9...O3    | 0.93             | 2.33               | 3.219(7)               | 160          | – <i>x</i> , –1/2+ <i>y</i> , 1/2– <i>z</i>     |
| C10–H10...O1  | 0.93             | 2.37               | 3.148(9)               | 142          | – <i>x</i> , –1/2+ <i>y</i> , 1/2– <i>z</i>     |
| <b>2</b>      |                  |                    |                        |              |                                                 |
| N2–H12N...O6  | 0.85(4)          | 2.18(3)            | 2.980(4)               | 158(3)       | <i>x</i> , <i>y</i> , <i>z</i>                  |
| N4–H14N...O3  | 0.88(4)          | 2.13(3)            | 3.010(4)               | 177(3)       | <i>x</i> , –1/2– <i>y</i> , –1/2+ <i>z</i>      |
| N2–H22N...O2  | 0.91(3)          | 2.16(3)            | 3.004(3)               | 153(3)       | – <i>x</i> +1, 1/2+ <i>y</i> , 1/2– <i>z</i>    |
| N4–H24N...O2  | 0.97(4)          | 2.00(4)            | 2.920(4)               | 159(4)       | – <i>x</i> , – <i>y</i> –1, – <i>z</i>          |
| C3–H3...O4    | 0.93             | 2.46               | 3.321(4)               | 154          | – <i>x</i> , 1/2+ <i>y</i> , 1/2– <i>z</i>      |
| C5–H5...O3    | 0.93             | 2.41               | 3.272(3)               | 155          | – <i>x</i> +1, 1/2+ <i>y</i> , 1/2– <i>z</i>    |
| <b>3</b>      |                  |                    |                        |              |                                                 |
| N2–H12N...O4  | 0.86(1)          | 2.12(1)            | 2.970(4)               | 172(4)       | – <i>x</i> , – <i>y</i> +1, – <i>z</i> +2       |
| N2–H22N...O9  | 0.86(1)          | 2.27(1)            | 3.112(4)               | 169(4)       | – <i>x</i> +1/2, <i>y</i> –1/2, – <i>z</i> +3/2 |
| N4–H24N...O3  | 0.86(1)          | 2.06(1)            | 2.913(4)               | 173(4)       | <i>x</i> +3/2, – <i>y</i> +3/2, <i>z</i> +1/2   |
| N6–H16N...O1  | 0.86(1)          | 2.03(2)            | 2.849(4)               | 159(4)       | <i>x</i> –1/2, – <i>y</i> +3/2, <i>z</i> –1/2   |
| N6–H26N...O2  | 0.86(1)          | 2.06(1)            | 2.921(4)               | 173(4)       | <i>x</i> –3/2, – <i>y</i> +3/2, <i>z</i> –1/2   |
| N8–H18N...O1  | 0.86(1)          | 2.07(1)            | 2.932(4)               | 177(5)       | – <i>x</i> , – <i>y</i> +1, – <i>z</i> +2       |
| N8–H28N...O10 | 0.86(1)          | 2.19(2)            | 3.011(5)               | 160(4)       | – <i>x</i> –1/2, <i>y</i> –1/2, – <i>z</i> +3/2 |
| O5–H15O...O3  | 0.83(1)          | 1.98(2)            | 2.777(4)               | 162(4)       | <i>x</i> +1, <i>y</i> , <i>z</i>                |
| O5–H25O...O13 | 0.82(1)          | 2.08(1)            | 2.898(5)               | 172(4)       | <i>x</i> , <i>y</i> , <i>z</i>                  |
| O6–H16O...O12 | 0.82(1)          | 2.36(1)            | 3.171(7)               | 177(6)       | – <i>x</i> +1, – <i>y</i> +1, – <i>z</i> +1     |
| O7–H17O...O8  | 0.81(1)          | 2.11(2)            | 2.893(4)               | 163(4)       | <i>x</i> , <i>y</i> , <i>z</i>                  |
| O7–H27O...N7  | 0.82(1)          | 1.89(1)            | 2.692(4)               | 167(4)       | <i>x</i> , <i>y</i> , <i>z</i>                  |
| C11–H11...O8  | 0.93             | 2.44               | 3.361(5)               | 172          | <i>x</i> , <i>y</i> , <i>z</i>                  |
| C16–H16...O4  | 0.93             | 2.56               | 3.229(4)               | 129          | <i>x</i> +1/2, – <i>y</i> +3/2, <i>z</i> –1/2   |
| C17–H17...O10 | 0.93             | 2.41               | 3.275(5)               | 154          | <i>x</i> +1, <i>y</i> , <i>z</i>                |
| C22–H22...O15 | 0.93             | 2.52               | 3.286(6)               | 139          | – <i>x</i> +1, – <i>y</i> +1, – <i>z</i> +1     |

## 2. IR spectra

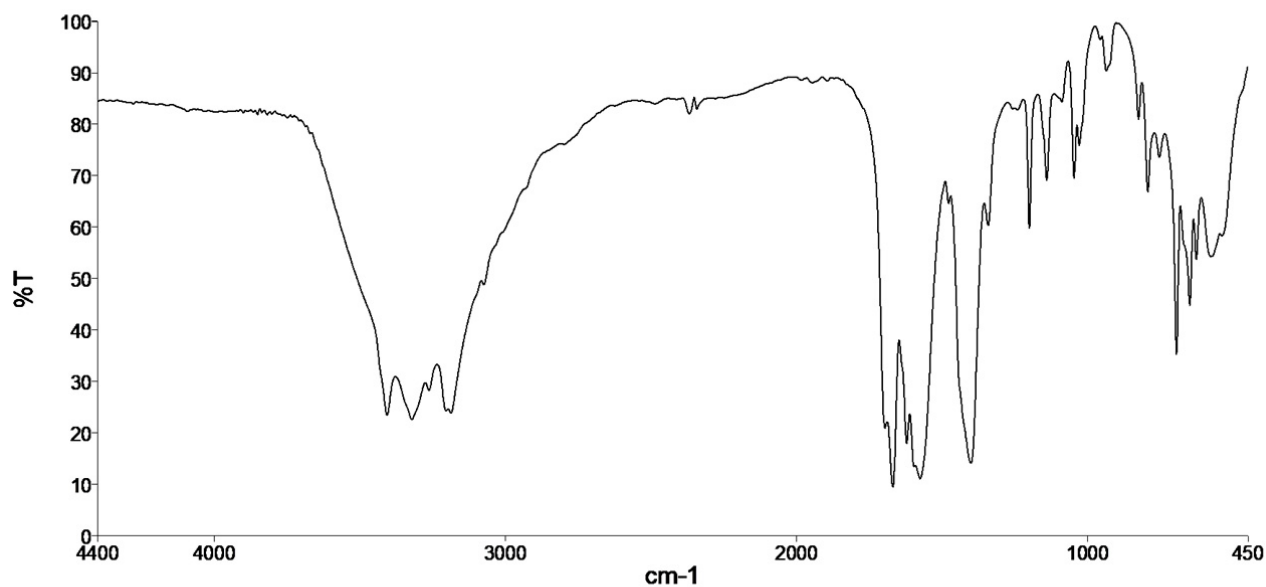

Figure S1. IR spectrum of  $[\text{Cd}(\text{CH}_3\text{COO})_2(\text{nia})_2]$  (1).

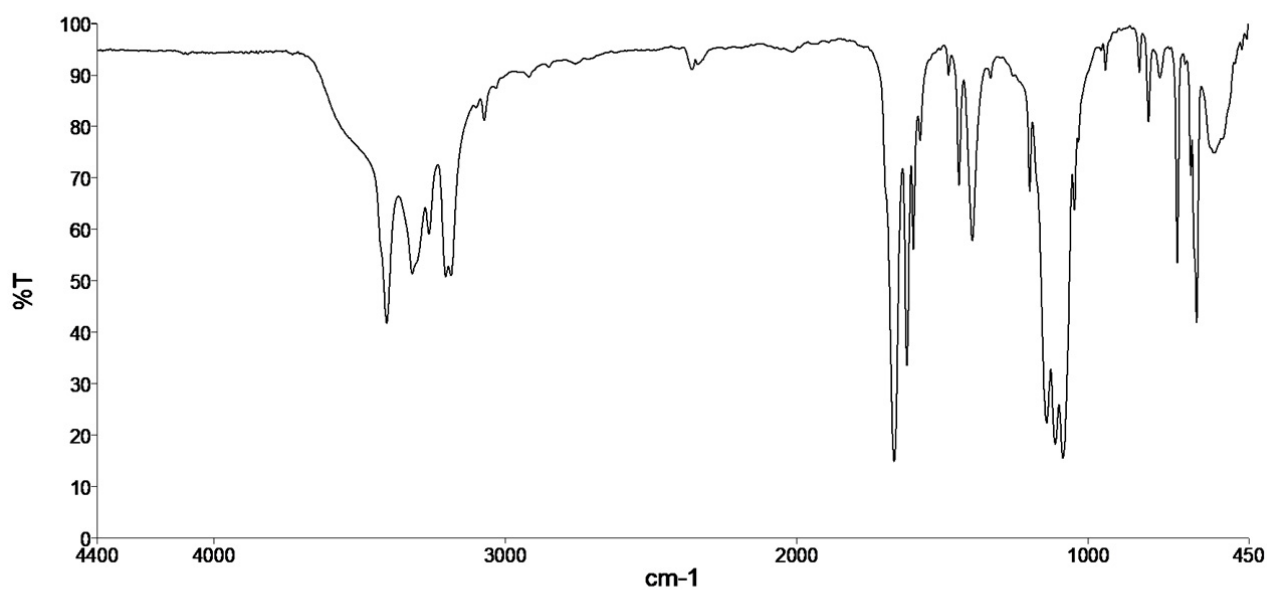

Figure S2. IR spectrum of  $[\text{Cd}(\text{nia})_4](\text{ClO}_4)_2$  (2).

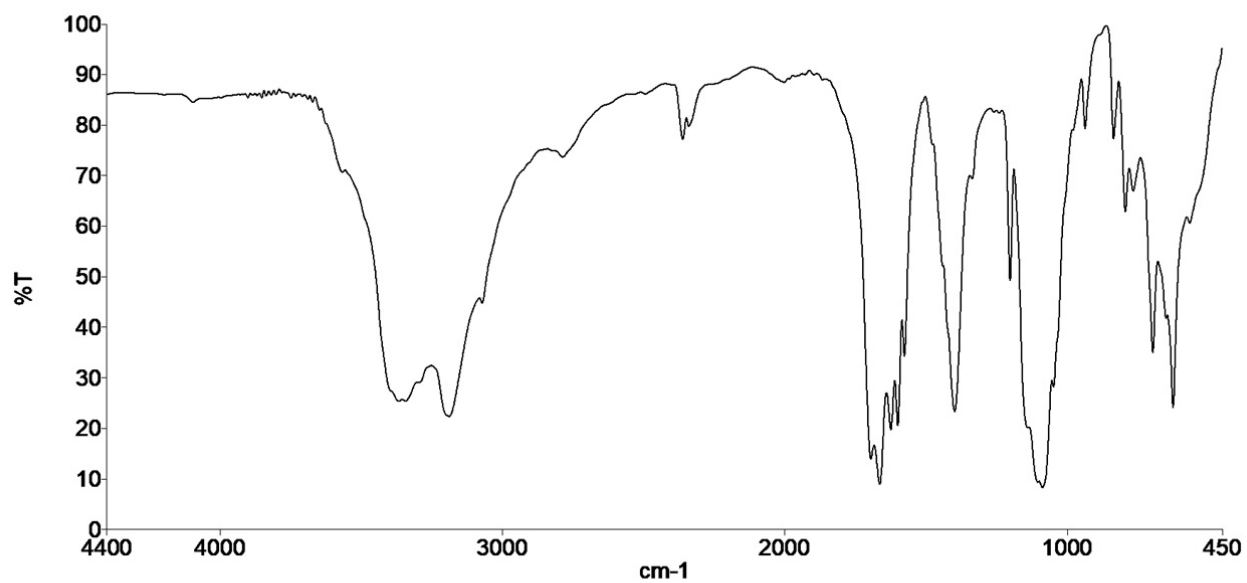

**Figure S3.** IR spectrum of  $[\text{Cd}(\text{H}_2\text{O})_3(\text{nia})_3](\text{ClO}_4)_2 \cdot \text{nia}$  (**3**).

### 3. TGA/DTA curves

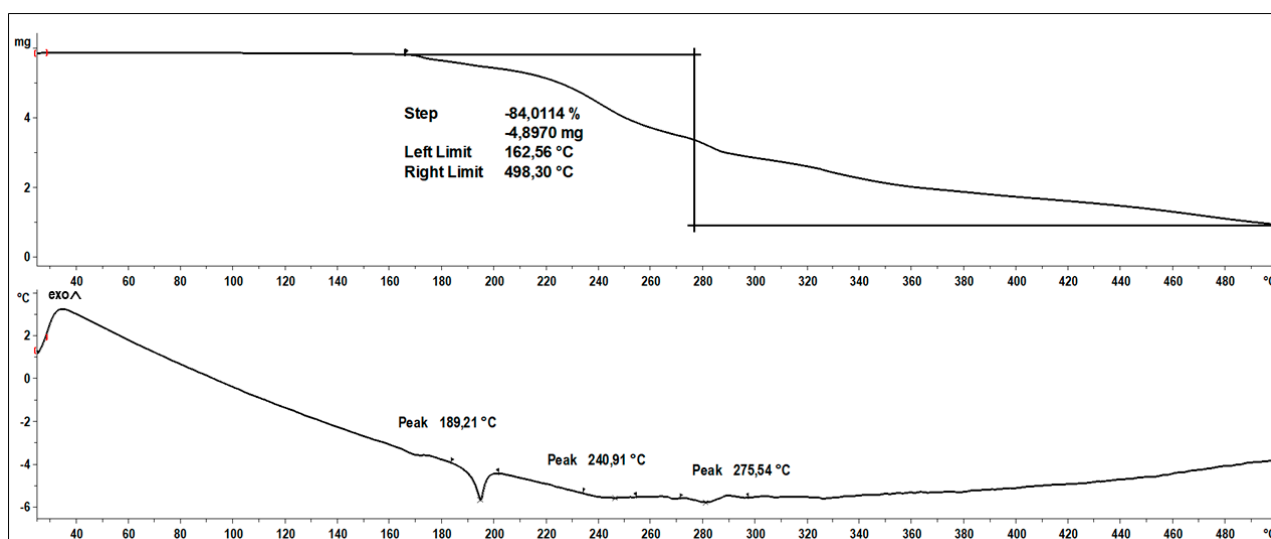

Figure S4. TGA/DTA curves of  $[\text{Cd}(\text{CH}_3\text{COO})_2(\text{nia})_2]_2$  (1).

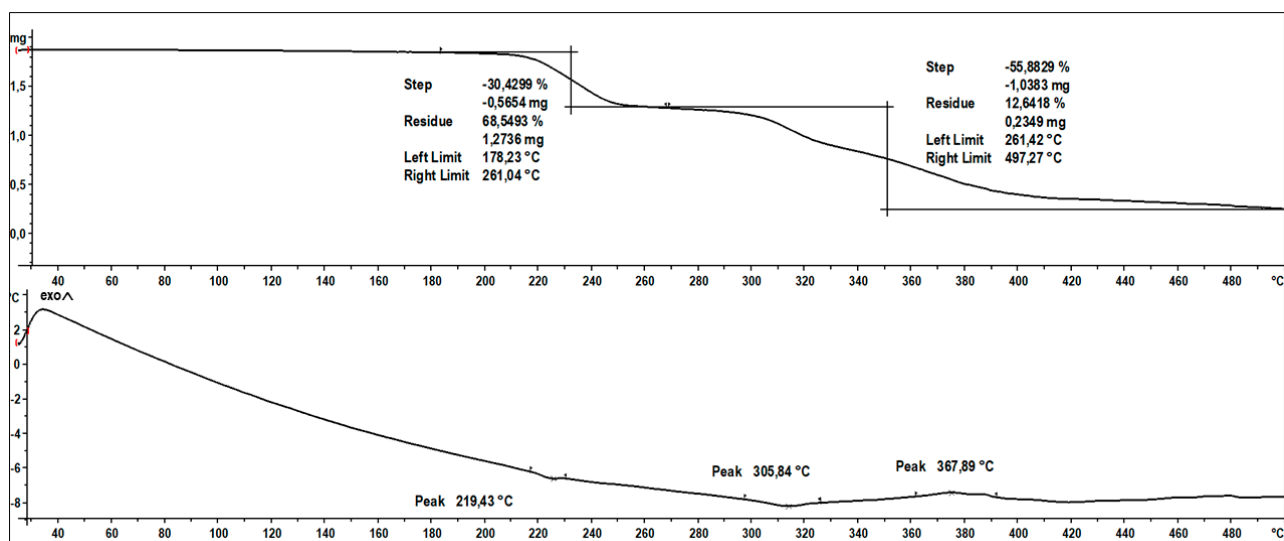

Figure S5. TGA/DTA curves of  $\{[\text{Cd}(\text{nia})_4](\text{ClO}_4)_2\}_n$  (2).

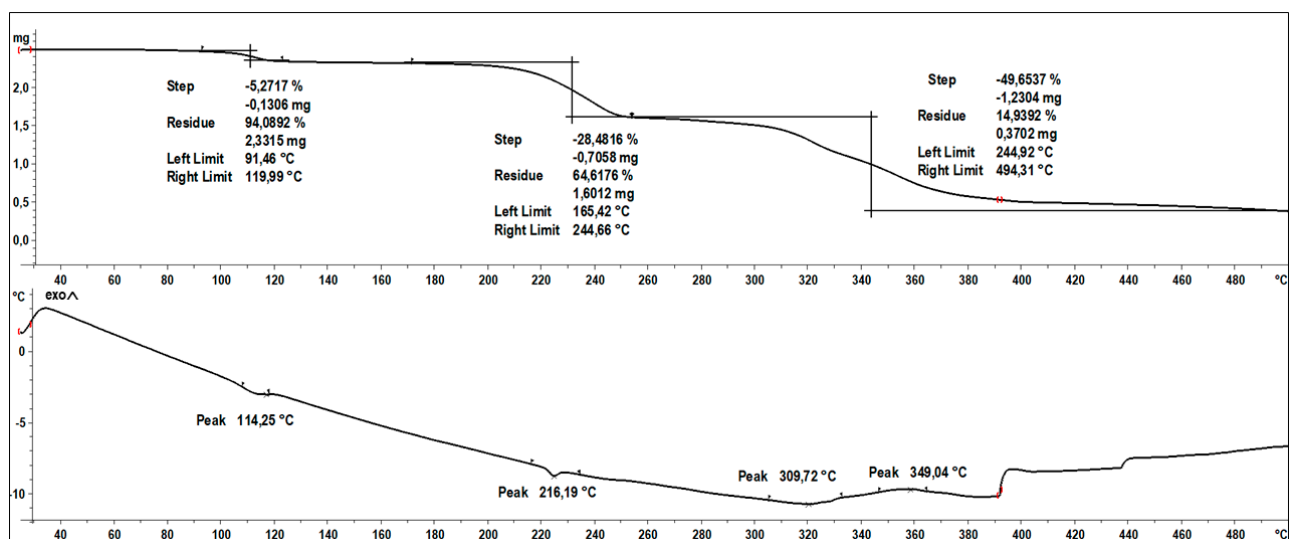

**Figure S6.** TGA/DTA curves of  $[\text{Cd}(\text{H}_2\text{O})_3(\text{nia})_3](\text{ClO}_4)_2 \cdot \text{nia}$  (3).
